# Supplementary material for: Cross-platform genomic identification and clinical validation of breast cancer diagnostic biomarkers
Source: Aging (Albany NY). 2021 Jan 20;13(3):4258–73. doi: 10.18632/aging.202388 (PMC7906147; doi:10.18632/aging.202388)
Supplement: Supplementary Table 1 [file aging-13-202388-s002.xlsx]

## Sheet: hsa-miR-423-5p target genes 
Supplementary Table 1. High confidential predicted hsa-miR-423-5p target mRNA.
miRNA	MIMATid	Gene	EntrezID	RefseqID	Gene	miRWalk	Microt4	miRanda	mirbridge	miRDB	miRMap	miRNAMap	Pictar2	PITA	RNA22	RNAhybrid	Targetscan	SUM
hsa-miR-423-5p	MIMAT0004748	PA2G4	5036	NM_006191	PA2G4	1	1	1	1	1	1	0	1	1	1	1	1	11
hsa-miR-423-5p	MIMAT0004748	SOX12	6666	NM_006943	SOX12	1	1	1	0	1	1	0	1	1	1	1	1	10
hsa-miR-423-5p	MIMAT0004748	SYP	6855	NM_003179	SYP	1	1	1	0	1	1	0	1	1	1	1	1	10
hsa-miR-423-5p	MIMAT0004748	PLCB1	23236	NM_182734	PLCB1	1	1	1	0	1	1	0	1	1	1	1	1	10
hsa-miR-423-5p	MIMAT0004748	BEND3	57673	NM_001080450	BEND3	1	1	1	0	1	1	0	1	1	1	1	1	10
hsa-miR-423-5p	MIMAT0004748	CADM3	57863	NM_021189	CADM3	1	1	1	0	1	1	0	1	1	1	1	1	10
hsa-miR-423-5p	MIMAT0004748	FBRS	64319	NM_001105079	FBRS	1	1	1	1	0	1	0	1	1	1	1	1	10
hsa-miR-423-5p	MIMAT0004748	COPS7B	64708	NM_022730	COPS7B	1	1	1	0	1	1	0	1	1	1	1	1	10
hsa-miR-423-5p	MIMAT0004748	AQP1	358	NM_198098	AQP1	1	1	1	0	0	1	0	1	1	1	1	1	9
hsa-miR-423-5p	MIMAT0004748	ARSB	411	NM_000046	ARSB	1	1	1	1	0	1	0	0	1	1	1	1	9
hsa-miR-423-5p	MIMAT0004748	CACNB1	782	NM_000723	CACNB1	1	1	1	0	0	1	0	1	1	1	1	1	9
hsa-miR-423-5p	MIMAT0004748	TBCB	1155	NM_001281	TBCB	1	1	1	0	0	1	0	1	1	1	1	1	9
hsa-miR-423-5p	MIMAT0004748	DMWD	1762	NM_004943	DMWD	1	1	1	0	1	1	0	0	1	1	1	1	9
hsa-miR-423-5p	MIMAT0004748	DUSP8	1850	NM_004420	DUSP8	1	1	1	0	1	1	0	0	1	1	1	1	9
hsa-miR-423-5p	MIMAT0004748	EFNA3	1944	NM_004952	EFNA3	1	1	1	0	0	1	0	1	1	1	1	1	9
hsa-miR-423-5p	MIMAT0004748	CELSR2	1952	NM_001408	CELSR2	1	1	1	0	0	1	0	1	1	1	1	1	9
hsa-miR-423-5p	MIMAT0004748	ERF	2077	NM_006494	ERF	1	1	1	0	0	1	0	1	1	1	1	1	9
hsa-miR-423-5p	MIMAT0004748	B4GALNT1	2583	NM_001478	B4GALNT1	1	1	1	0	1	1	0	0	1	1	1	1	9
hsa-miR-423-5p	MIMAT0004748	HTT	3064	NM_002111	HTT	1	1	1	0	0	1	0	1	1	1	1	1	9
hsa-miR-423-5p	MIMAT0004748	HDGF	3068	NM_004494	HDGF	1	1	1	1	0	1	0	0	1	1	1	1	9
hsa-miR-423-5p	MIMAT0004748	HOXB9	3219	NM_024017	HOXB9	1	1	1	0	1	1	0	0	1	1	1	1	9
hsa-miR-423-5p	MIMAT0004748	AGFG2	3268	NM_006076	AGFG2	1	1	1	1	0	1	0	0	1	1	1	1	9
hsa-miR-423-5p	MIMAT0004748	IL17A	3605	NM_002190	IL17A	1	1	1	0	1	1	0	0	1	1	1	1	9
hsa-miR-423-5p	MIMAT0004748	IMPDH1	3614	NM_000883	IMPDH1	1	1	1	1	0	1	0	1	0	1	1	1	9
hsa-miR-423-5p	MIMAT0004748	MMP15	4324	NM_002428	MMP15	1	1	1	1	0	1	0	0	1	1	1	1	9
hsa-miR-423-5p	MIMAT0004748	MN1	4330	NM_002430	MN1	1	1	1	1	0	1	0	0	1	1	1	1	9
hsa-miR-423-5p	MIMAT0004748	MTR	4548	NM_000254	MTR	1	1	1	0	1	1	0	0	1	1	1	1	9
hsa-miR-423-5p	MIMAT0004748	NTRK3	4916	NM_001007156	NTRK3	1	1	1	0	0	1	0	1	1	1	1	1	9
hsa-miR-423-5p	MIMAT0004748	PER1	5187	NM_002616	PER1	1	1	1	0	0	1	0	1	1	1	1	1	9
hsa-miR-423-5p	MIMAT0004748	PLXNA1	5361	NM_032242	PLXNA1	1	1	1	0	0	1	0	1	1	1	1	1	9
hsa-miR-423-5p	MIMAT0004748	PML	5371	NM_033238	PML	1	1	1	0	1	1	0	0	1	1	1	1	9
hsa-miR-423-5p	MIMAT0004748	PKIA	5569	NM_006823	PKIA	1	1	1	0	1	1	0	1	0	1	1	1	9
hsa-miR-423-5p	MIMAT0004748	ATXN1	6310	NM_000332	ATXN1	1	1	1	1	0	1	0	0	1	1	1	1	9
hsa-miR-423-5p	MIMAT0004748	ITSN1	6453	NM_003024	ITSN1	1	1	1	0	0	1	0	1	1	1	1	1	9
hsa-miR-423-5p	MIMAT0004748	SLC7A1	6541	NM_003045	SLC7A1	1	1	1	1	0	1	0	0	1	1	1	1	9
hsa-miR-423-5p	MIMAT0004748	STAT5B	6777	NM_012448	STAT5B	1	1	1	0	0	1	0	1	1	1	1	1	9
hsa-miR-423-5p	MIMAT0004748	TAL1	6886	NM_003189	TAL1	1	1	1	0	0	1	0	1	1	1	1	1	9
hsa-miR-423-5p	MIMAT0004748	TEF	7008	NM_003216	TEF	1	1	1	0	1	1	0	0	1	1	1	1	9
hsa-miR-423-5p	MIMAT0004748	TYRO3	7301	NM_006293	TYRO3	1	1	1	0	1	1	0	0	1	1	1	1	9
hsa-miR-423-5p	MIMAT0004748	VGF	7425	NM_003378	VGF	1	1	1	0	0	1	0	1	1	1	1	1	9
hsa-miR-423-5p	MIMAT0004748	BAP1	8314	NM_004656	BAP1	1	1	1	0	0	1	0	1	1	1	1	1	9
hsa-miR-423-5p	MIMAT0004748	SOCS3	9021	NM_003955	SOCS3	1	1	1	1	0	1	0	0	1	1	1	1	9
hsa-miR-423-5p	MIMAT0004748	SPATA2	9825	NM_001135773	SPATA2	1	1	1	1	1	1	0	0	0	1	1	1	9
hsa-miR-423-5p	MIMAT0004748	CTDSP2	10106	NM_005730	CTDSP2	1	1	1	1	0	1	0	0	1	1	1	1	9
hsa-miR-423-5p	MIMAT0004748	BAZ2A	11176	NM_013449	BAZ2A	1	1	1	0	0	1	0	1	1	1	1	1	9
hsa-miR-423-5p	MIMAT0004748	MRAS	22808	NM_012219	MRAS	1	1	1	0	1	1	0	1	0	1	1	1	9
hsa-miR-423-5p	MIMAT0004748	ZNF609	23060	NM_015042	ZNF609	1	1	1	0	0	1	0	1	1	1	1	1	9
hsa-miR-423-5p	MIMAT0004748	N4BP3	23138	NM_015111	N4BP3	1	1	1	0	1	1	0	0	1	1	1	1	9
hsa-miR-423-5p	MIMAT0004748	ZDHHC5	25921	NM_015457	ZDHHC5	1	1	1	0	0	1	0	1	1	1	1	1	9
hsa-miR-423-5p	MIMAT0004748	PNKD	25953	NM_015488	PNKD	1	1	1	0	1	1	0	1	0	1	1	1	9
hsa-miR-423-5p	MIMAT0004748	IRF2BP1	26145	NM_015649	IRF2BP1	1	1	1	0	0	1	0	1	1	1	1	1	9
hsa-miR-423-5p	MIMAT0004748	B3GAT3	26229	NM_012200	B3GAT3	1	1	1	0	0	1	0	1	1	1	1	1	9
hsa-miR-423-5p	MIMAT0004748	CEND1	51286	NM_016564	CEND1	1	1	1	0	1	1	0	0	1	1	1	1	9
hsa-miR-423-5p	MIMAT0004748	UBE2R2	54926	NM_017811	UBE2R2	1	1	1	1	0	1	0	0	1	1	1	1	9
hsa-miR-423-5p	MIMAT0004748	PACS1	55690	NM_018026	PACS1	1	1	1	0	1	1	0	0	1	1	1	1	9
hsa-miR-423-5p	MIMAT0004748	GNG12	55970	NM_018841	GNG12	1	1	1	1	0	1	0	0	1	1	1	1	9
hsa-miR-423-5p	MIMAT0004748	UBFD1	56061	NM_019116	UBFD1	1	1	1	0	0	1	0	1	1	1	1	1	9
hsa-miR-423-5p	MIMAT0004748	CDC42SE1	56882	NM_001038707	CDC42SE1	1	1	1	0	1	1	0	1	0	1	1	1	9
hsa-miR-423-5p	MIMAT0004748	JPH2	57158	NM_020433	JPH2	1	1	1	0	0	1	0	1	1	1	1	1	9
hsa-miR-423-5p	MIMAT0004748	CTDSP1	58190	NM_021198	CTDSP1	1	1	1	0	1	1	0	0	1	1	1	1	9
hsa-miR-423-5p	MIMAT0004748	BACH2	60468	NM_021813	BACH2	0	1	1	1	0	1	0	1	1	1	1	1	9
hsa-miR-423-5p	MIMAT0004748	C22orf29	79680	NM_024627	C22orf29	1	1	1	0	1	1	0	0	1	1	1	1	9
hsa-miR-423-5p	MIMAT0004748	TMUB1	83590	NM_031434	TMUB1	0	1	1	1	0	1	0	1	1	1	1	1	9
hsa-miR-423-5p	MIMAT0004748	STK40	83931	NM_032017	STK40	1	1	1	0	1	1	0	0	1	1	1	1	9
hsa-miR-423-5p	MIMAT0004748	TMEM25	84866	NM_032780	TMEM25	1	1	1	0	1	1	0	0	1	1	1	1	9
hsa-miR-423-5p	MIMAT0004748	ARHGEF39	84904	NM_032818	ARHGEF39	1	1	1	0	1	1	0	0	1	1	1	1	9
hsa-miR-423-5p	MIMAT0004748	ATCAY	85300	NM_033064	ATCAY	1	1	1	0	1	1	0	0	1	1	1	1	9
hsa-miR-423-5p	MIMAT0004748	PAQR8	85315	NM_133367	PAQR8	1	1	1	0	1	1	0	0	1	1	1	1	9
hsa-miR-423-5p	MIMAT0004748	TMEM41A	90407	NM_080652	TMEM41A	1	1	1	0	1	1	0	0	1	1	1	1	9
hsa-miR-423-5p	MIMAT0004748	RASL10B	91608	NM_033315	RASL10B	1	1	1	0	0	1	0	1	1	1	1	1	9
hsa-miR-423-5p	MIMAT0004748	GLYCTK	132158	NM_145262	GLYCTK	1	1	1	0	1	1	0	0	1	1	1	1	9
hsa-miR-423-5p	MIMAT0004748	RIMS4	140730	NM_001205317	RIMS4	1	1	1	0	1	1	0	1	0	1	1	1	9
hsa-miR-423-5p	MIMAT0004748	NFAM1	150372	NM_145912	NFAM1	1	1	1	0	1	1	0	0	1	1	1	1	9
hsa-miR-423-5p	MIMAT0004748	ANKRD52	283373	NM_173595	ANKRD52	1	1	1	0	0	1	0	1	1	1	1	1	9
hsa-miR-423-5p	MIMAT0004748	KIAA2022	340533	NM_001008537	KIAA2022	1	1	1	0	1	1	0	0	1	1	1	1	9
hsa-miR-423-5p	MIMAT0004748	TMEM189	387521	NM_199129	TMEM189	1	1	1	0	1	1	0	0	1	1	1	1	9
hsa-miR-423-5p	MIMAT0004748	SBK1	388228	NM_001024401	SBK1	1	1	1	0	1	1	0	0	1	1	1	1	9
hsa-miR-423-5p	MIMAT0004748	C11orf87	399947	NM_207645	C11orf87	1	1	1	0	0	1	0	1	1	1	1	1	9
hsa-miR-423-5p	MIMAT0004748	EVC	2121	NM_153717	EVC	1	0	1	1	1	1	0	0	1	1	1	1	9
hsa-miR-423-5p	MIMAT0004748	2018-09-09	10801	NM_006640	2018-09-09	1	0	1	1	1	1	0	0	1	1	1	1	9
hsa-miR-423-5p	MIMAT0004748	ACACA	31	NM_198839	ACACA	1	1	1	0	1	1	0	0	0	1	1	1	8
hsa-miR-423-5p	MIMAT0004748	ASIC1	41	NM_020039	ASIC1	1	1	1	0	0	1	0	1	0	1	1	1	8
hsa-miR-423-5p	MIMAT0004748	ANPEP	290	NM_001150	ANPEP	1	1	1	0	0	1	0	1	1	0	1	1	8
hsa-miR-423-5p	MIMAT0004748	PHOX2A	401	NM_005169	PHOX2A	1	1	1	0	0	1	0	0	1	1	1	1	8
hsa-miR-423-5p	MIMAT0004748	ATP6V1G2	534	NM_130463	ATP6V1G2	1	1	1	0	1	1	0	0	0	1	1	1	8
hsa-miR-423-5p	MIMAT0004748	BAI2	576	NM_001703	BAI2	1	1	1	0	0	1	0	0	1	1	1	1	8
hsa-miR-423-5p	MIMAT0004748	NKX3-2	579	NM_001189	NKX3-2	1	1	1	0	0	1	0	0	1	1	1	1	8
hsa-miR-423-5p	MIMAT0004748	DAGLA	747	NM_006133	DAGLA	1	1	1	0	0	1	0	0	1	1	1	1	8
hsa-miR-423-5p	MIMAT0004748	FMNL1	752	NM_005892	FMNL1	1	1	1	0	0	1	0	0	1	1	1	1	8
hsa-miR-423-5p	MIMAT0004748	CACNB3	784	NM_000725	CACNB3	1	1	0	1	0	1	0	0	1	1	1	1	8
hsa-miR-423-5p	MIMAT0004748	CCNF	899	NM_001761	CCNF	1	1	1	0	0	1	0	0	1	1	1	1	8
hsa-miR-423-5p	MIMAT0004748	CD5	921	NM_014207	CD5	1	1	1	0	0	1	0	0	1	1	1	1	8
hsa-miR-423-5p	MIMAT0004748	CD34	947	NM_001773	CD34	1	1	1	0	0	1	0	0	1	1	1	1	8
hsa-miR-423-5p	MIMAT0004748	CDH5	1003	NM_001795	CDH5	1	1	1	0	0	1	0	0	1	1	1	1	8
hsa-miR-423-5p	MIMAT0004748	CDKN1A	1026	NM_001220778	CDKN1A	1	1	1	0	1	1	0	0	0	1	1	1	8
hsa-miR-423-5p	MIMAT0004748	CEBPB	1051	NM_005194	CEBPB	1	1	1	0	0	1	0	0	1	1	1	1	8
hsa-miR-423-5p	MIMAT0004748	COL1A1	1277	NM_000088	COL1A1	1	1	1	0	0	1	0	0	1	1	1	1	8
hsa-miR-423-5p	MIMAT0004748	CYP21A2	1589	NM_000500	CYP21A2	1	1	0	1	0	1	0	1	0	1	1	1	8
hsa-miR-423-5p	MIMAT0004748	DAO	1610	NM_001917	DAO	1	1	1	0	0	1	0	0	1	1	1	1	8
hsa-miR-423-5p	MIMAT0004748	DLX3	1747	NM_005220	DLX3	1	1	1	0	0	1	0	0	1	1	1	1	8
hsa-miR-423-5p	MIMAT0004748	DVL3	1857	NM_004423	DVL3	1	1	1	0	0	1	0	0	1	1	1	1	8
hsa-miR-423-5p	MIMAT0004748	EFNA5	1946	NM_001962	EFNA5	1	1	0	1	0	1	0	0	1	1	1	1	8
hsa-miR-423-5p	MIMAT0004748	EGR1	1958	NM_001964	EGR1	1	1	1	0	0	1	0	0	1	1	1	1	8
hsa-miR-423-5p	MIMAT0004748	MARK2	2011	NM_001039469	MARK2	1	1	1	0	0	1	0	1	0	1	1	1	8
hsa-miR-423-5p	MIMAT0004748	EPHB3	2049	NM_004443	EPHB3	1	1	1	0	0	1	0	0	1	1	1	1	8
hsa-miR-423-5p	MIMAT0004748	EPHB4	2050	NM_004444	EPHB4	1	1	1	0	0	1	0	1	1	0	1	1	8
hsa-miR-423-5p	MIMAT0004748	STX2	2054	NM_194356	STX2	1	1	1	0	0	1	0	0	1	1	1	1	8
hsa-miR-423-5p	MIMAT0004748	FLOT2	2319	NM_004475	FLOT2	1	1	1	0	0	1	0	0	1	1	1	1	8
hsa-miR-423-5p	MIMAT0004748	FOSB	2354	NM_006732	FOSB	1	1	1	0	0	1	0	0	1	1	1	1	8
hsa-miR-423-5p	MIMAT0004748	FUT1	2523	NM_000148	FUT1	1	1	1	0	0	1	0	0	1	1	1	1	8
hsa-miR-423-5p	MIMAT0004748	GALNT2	2590	NM_004481	GALNT2	1	1	1	0	0	1	0	0	1	1	1	1	8
hsa-miR-423-5p	MIMAT0004748	GDI1	2664	NM_001493	GDI1	1	1	1	0	0	1	0	0	1	1	1	1	8
hsa-miR-423-5p	MIMAT0004748	GLP1R	2740	NM_002062	GLP1R	1	1	1	0	0	1	0	0	1	1	1	1	8
hsa-miR-423-5p	MIMAT0004748	GNB1	2782	NM_002074	GNB1	1	1	0	0	0	1	0	1	1	1	1	1	8
hsa-miR-423-5p	MIMAT0004748	GOLGA4	2803	NM_002078	GOLGA4	1	1	1	0	0	1	0	0	1	1	1	1	8
hsa-miR-423-5p	MIMAT0004748	GRM4	2914	NM_000841	GRM4	1	1	1	0	0	1	0	0	1	1	1	1	8
hsa-miR-423-5p	MIMAT0004748	GSK3A	2931	NM_019884	GSK3A	1	1	1	0	0	1	0	0	1	1	1	1	8
hsa-miR-423-5p	MIMAT0004748	GYS1	2997	NM_002103	GYS1	1	1	1	0	0	1	0	0	1	1	1	1	8
hsa-miR-423-5p	MIMAT0004748	HK2	3099	NM_000189	HK2	0	1	1	1	0	1	0	0	1	1	1	1	8
hsa-miR-423-5p	MIMAT0004748	HLA-DOA	3111	NM_002119	HLA-DOA	1	1	1	0	0	1	0	0	1	1	1	1	8
hsa-miR-423-5p	MIMAT0004748	HPCA	3208	NM_002143	HPCA	1	1	1	0	0	1	0	0	1	1	1	1	8
hsa-miR-423-5p	MIMAT0004748	HOXC10	3226	NM_017409	HOXC10	0	1	1	0	0	1	0	1	1	1	1	1	8
hsa-miR-423-5p	MIMAT0004748	HPS1	3257	NM_000195	HPS1	1	1	1	0	0	1	0	0	1	1	1	1	8
hsa-miR-423-5p	MIMAT0004748	NDST1	3340	XM_005268435	NDST1	1	1	1	1	0	1	0	0	0	1	1	1	8
hsa-miR-423-5p	MIMAT0004748	IRF1	3659	NM_002198	IRF1	1	1	1	0	0	1	0	0	1	1	1	1	8
hsa-miR-423-5p	MIMAT0004748	ITGA5	3678	NM_002205	ITGA5	1	1	1	0	0	1	0	0	1	1	1	1	8
hsa-miR-423-5p	MIMAT0004748	KCNC4	3749	NM_004978	KCNC4	1	1	1	0	0	1	0	1	0	1	1	1	8
hsa-miR-423-5p	MIMAT0004748	KIF5C	3800	NM_004522	KIF5C	1	1	1	0	0	1	0	0	1	1	1	1	8
hsa-miR-423-5p	MIMAT0004748	KRT3	3850	NM_057088	KRT3	1	1	1	0	0	1	0	0	1	1	1	1	8
hsa-miR-423-5p	MIMAT0004748	KRT83	3889	NM_002282	KRT83	1	1	1	0	0	1	0	0	1	1	1	1	8
hsa-miR-423-5p	MIMAT0004748	LASP1	3927	NM_006148	LASP1	1	1	1	0	0	1	0	0	1	1	1	1	8
hsa-miR-423-5p	MIMAT0004748	MEF2D	4209	NM_005920	MEF2D	1	1	1	0	0	1	0	0	1	1	1	1	8
hsa-miR-423-5p	MIMAT0004748	KMT2A	4297	NM_001197104	KMT2A	1	1	1	0	0	1	0	1	0	1	1	1	8
hsa-miR-423-5p	MIMAT0004748	MMP2	4313	NM_004530	MMP2	1	1	1	0	0	1	0	0	1	1	1	1	8
hsa-miR-423-5p	MIMAT0004748	MSI1	4440	NM_002442	MSI1	1	1	1	0	0	1	0	0	1	1	1	1	8
hsa-miR-423-5p	MIMAT0004748	MVK	4598	NM_000431	MVK	1	1	1	0	0	1	0	0	1	1	1	1	8
hsa-miR-423-5p	MIMAT0004748	MYBL2	4605	NM_002466	MYBL2	1	1	1	0	0	1	0	1	1	0	1	1	8
hsa-miR-423-5p	MIMAT0004748	MYO1D	4642	NM_015194	MYO1D	1	1	1	0	0	1	0	0	1	1	1	1	8
hsa-miR-423-5p	MIMAT0004748	MYO5A	4644	NM_000259	MYO5A	1	1	1	0	0	1	0	0	1	1	1	1	8
hsa-miR-423-5p	MIMAT0004748	MYO9B	4650	NM_001130065	MYO9B	1	1	1	0	0	1	0	1	0	1	1	1	8
hsa-miR-423-5p	MIMAT0004748	NAGA	4668	NM_000262	NAGA	1	1	1	0	0	1	0	0	1	1	1	1	8
hsa-miR-423-5p	MIMAT0004748	NEUROG1	4762	NM_006161	NEUROG1	1	1	1	0	0	1	0	0	1	1	1	1	8
hsa-miR-423-5p	MIMAT0004748	NFATC4	4776	NM_001136022	NFATC4	1	1	1	0	0	1	0	1	0	1	1	1	8
hsa-miR-423-5p	MIMAT0004748	NFIX	4784	NM_001271043	NFIX	1	1	1	0	0	1	0	1	0	1	1	1	8
hsa-miR-423-5p	MIMAT0004748	NGF	4803	NM_002506	NGF	1	1	1	0	0	1	0	0	1	1	1	1	8
hsa-miR-423-5p	MIMAT0004748	NGFR	4804	NM_002507	NGFR	1	1	1	0	0	1	0	0	1	1	1	1	8
hsa-miR-423-5p	MIMAT0004748	NID1	4811	NM_002508	NID1	1	1	1	0	0	1	0	0	1	1	1	1	8
hsa-miR-423-5p	MIMAT0004748	NPTX1	4884	NM_002522	NPTX1	1	1	1	0	0	1	0	0	1	1	1	1	8
hsa-miR-423-5p	MIMAT0004748	NPTX2	4885	NM_002523	NPTX2	1	1	1	0	0	1	0	0	1	1	1	1	8
hsa-miR-423-5p	MIMAT0004748	SLC11A2	4891	NM_001174129	SLC11A2	1	1	1	0	1	1	0	0	0	1	1	1	8
hsa-miR-423-5p	MIMAT0004748	NTSR1	4923	NM_002531	NTSR1	1	1	1	0	0	1	0	0	1	1	1	1	8
hsa-miR-423-5p	MIMAT0004748	PAFAH1B1	5048	NM_000430	PAFAH1B1	1	1	1	0	0	1	0	0	1	1	1	1	8
hsa-miR-423-5p	MIMAT0004748	SERPINE1	5054	NM_000602	SERPINE1	1	1	1	0	0	1	0	0	1	1	1	1	8
hsa-miR-423-5p	MIMAT0004748	PAX2	5076	NM_003988	PAX2	1	1	1	0	0	1	0	0	1	1	1	1	8
hsa-miR-423-5p	MIMAT0004748	PAX9	5083	NM_006194	PAX9	1	1	0	0	0	1	0	1	1	1	1	1	8
hsa-miR-423-5p	MIMAT0004748	PBX2	5089	NM_002586	PBX2	1	1	1	0	0	1	0	1	0	1	1	1	8
hsa-miR-423-5p	MIMAT0004748	PDE1B	5153	NM_000924	PDE1B	1	1	1	0	0	1	0	0	1	1	1	1	8
hsa-miR-423-5p	MIMAT0004748	PDYN	5173	NM_024411	PDYN	1	1	1	0	0	1	0	0	1	1	1	1	8
hsa-miR-423-5p	MIMAT0004748	PEX6	5190	NM_000287	PEX6	1	1	1	0	0	1	0	0	1	1	1	1	8
hsa-miR-423-5p	MIMAT0004748	PFAS	5198	NM_012393	PFAS	1	1	1	0	0	1	0	0	1	1	1	1	8
hsa-miR-423-5p	MIMAT0004748	PIM1	5292	NM_002648	PIM1	1	1	1	0	0	1	0	0	1	1	1	1	8
hsa-miR-423-5p	MIMAT0004748	PIK3R2	5296	NM_005027	PIK3R2	1	1	1	0	0	1	0	0	1	1	1	1	8
hsa-miR-423-5p	MIMAT0004748	POR	5447	NM_000941	POR	1	1	1	0	0	1	0	0	1	1	1	1	8
hsa-miR-423-5p	MIMAT0004748	PRKCG	5582	NM_002739	PRKCG	1	1	1	0	0	1	0	0	1	1	1	1	8
hsa-miR-423-5p	MIMAT0004748	PTGFRN	5738	NM_020440	PTGFRN	1	1	1	0	0	1	0	0	1	1	1	1	8
hsa-miR-423-5p	MIMAT0004748	PVR	5817	NM_006505	PVR	1	1	1	0	0	1	0	0	1	1	1	1	8
hsa-miR-423-5p	MIMAT0004748	PVRL1	5818	NM_002855	PVRL1	1	1	1	0	0	1	0	0	1	1	1	1	8
hsa-miR-423-5p	MIMAT0004748	ABCD4	5826	NM_005050	ABCD4	1	1	1	0	0	1	0	0	1	1	1	1	8
hsa-miR-423-5p	MIMAT0004748	RAC2	5880	NM_002872	RAC2	1	1	1	0	0	1	0	0	1	1	1	1	8
hsa-miR-423-5p	MIMAT0004748	RAD23A	5886	NM_005053	RAD23A	1	1	1	0	0	1	0	1	1	0	1	1	8
hsa-miR-423-5p	MIMAT0004748	RHO	6010	NM_000539	RHO	1	1	1	0	0	1	0	0	1	1	1	1	8
hsa-miR-423-5p	MIMAT0004748	SCN2B	6327	NM_004588	SCN2B	1	1	1	0	0	1	0	0	1	1	1	1	8
hsa-miR-423-5p	MIMAT0004748	CCL22	6367	NM_002990	CCL22	1	1	1	0	0	1	0	0	1	1	1	1	8
hsa-miR-423-5p	MIMAT0004748	SELL	6402	NM_000655	SELL	1	1	1	0	0	1	0	0	1	1	1	1	8
hsa-miR-423-5p	MIMAT0004748	SEPW1	6415	NM_003009	SEPW1	1	1	1	0	0	1	0	1	1	0	1	1	8
hsa-miR-423-5p	MIMAT0004748	SGSH	6448	NM_000199	SGSH	1	1	1	0	0	1	0	0	1	1	1	1	8
hsa-miR-423-5p	MIMAT0004748	SH3GL1	6455	NM_003025	SH3GL1	1	1	1	0	0	1	0	0	1	1	1	1	8
hsa-miR-423-5p	MIMAT0004748	SKI	6497	NM_003036	SKI	1	1	1	0	0	1	0	0	1	1	1	1	8
hsa-miR-423-5p	MIMAT0004748	SLC2A4	6517	NM_001042	SLC2A4	1	1	0	0	0	1	0	1	1	1	1	1	8
hsa-miR-423-5p	MIMAT0004748	SLC6A6	6533	NM_003043	SLC6A6	1	1	1	0	0	1	0	0	1	1	1	1	8
hsa-miR-423-5p	MIMAT0004748	SLC6A7	6534	NM_014228	SLC6A7	1	1	1	0	0	1	0	0	1	1	1	1	8
hsa-miR-423-5p	MIMAT0004748	SLC12A4	6560	NM_005072	SLC12A4	1	1	1	0	0	1	0	1	0	1	1	1	8
hsa-miR-423-5p	MIMAT0004748	SLC20A2	6575	NM_001257180	SLC20A2	1	1	1	0	0	1	0	1	0	1	1	1	8
hsa-miR-423-5p	MIMAT0004748	SLCO2A1	6578	NM_005630	SLCO2A1	1	1	1	0	0	1	0	0	1	1	1	1	8
hsa-miR-423-5p	MIMAT0004748	SOX1	6656	NM_005986	SOX1	1	1	1	0	0	1	0	0	1	1	1	1	8
hsa-miR-423-5p	MIMAT0004748	SREBF2	6721	NM_004599	SREBF2	1	1	1	0	0	1	0	0	1	1	1	1	8
hsa-miR-423-5p	MIMAT0004748	SRF	6722	NM_003131	SRF	1	1	1	0	0	1	0	0	1	1	1	1	8
hsa-miR-423-5p	MIMAT0004748	SRM	6723	NM_003132	SRM	1	1	1	0	0	1	0	0	1	1	1	1	8
hsa-miR-423-5p	MIMAT0004748	SSTR1	6751	NM_001049	SSTR1	1	1	1	0	0	1	0	0	1	1	1	1	8
hsa-miR-423-5p	MIMAT0004748	STXBP1	6812	NM_003165	STXBP1	1	1	1	0	0	1	0	0	1	1	1	1	8
hsa-miR-423-5p	MIMAT0004748	MED22	6837	NM_181491	MED22	1	1	1	0	0	1	0	0	1	1	1	1	8
hsa-miR-423-5p	MIMAT0004748	CNTN2	6900	NM_005076	CNTN2	1	1	1	0	0	1	0	0	1	1	1	1	8
hsa-miR-423-5p	MIMAT0004748	TBL1X	6907	NM_005647	TBL1X	1	1	1	0	0	1	0	0	1	1	1	1	8
hsa-miR-423-5p	MIMAT0004748	TBX2	6909	NM_005994	TBX2	1	1	1	0	0	1	0	0	1	1	1	1	8
hsa-miR-423-5p	MIMAT0004748	MLX	6945	NM_170607	MLX	1	1	1	0	0	1	0	1	0	1	1	1	8
hsa-miR-423-5p	MIMAT0004748	TGFBR3	7049	NM_003243	TGFBR3	1	1	1	0	0	1	0	0	1	1	1	1	8
hsa-miR-423-5p	MIMAT0004748	UBE2L3	7332	NM_003347	UBE2L3	1	1	1	0	0	1	0	1	0	1	1	1	8
hsa-miR-423-5p	MIMAT0004748	USF2	7392	NM_003367	USF2	1	1	1	0	0	1	0	1	0	1	1	1	8
hsa-miR-423-5p	MIMAT0004748	XBP1	7494	NM_005080	XBP1	1	1	1	0	0	1	0	0	1	1	1	1	8
hsa-miR-423-5p	MIMAT0004748	ZFPL1	7542	NM_006782	ZFPL1	1	1	1	0	0	1	0	0	1	1	1	1	8
hsa-miR-423-5p	MIMAT0004748	ZNF135	7694	NM_003436	ZNF135	1	1	0	1	0	1	0	0	1	1	1	1	8
hsa-miR-423-5p	MIMAT0004748	MAPKAPK3	7867	NM_001243926	MAPKAPK3	1	1	1	0	1	1	0	0	0	1	1	1	8
hsa-miR-423-5p	MIMAT0004748	ANP32A	8125	NM_006305	ANP32A	1	1	1	0	0	1	0	0	1	1	1	1	8
hsa-miR-423-5p	MIMAT0004748	ST8SIA2	8128	NM_006011	ST8SIA2	1	1	1	0	0	1	0	0	1	1	1	1	8
hsa-miR-423-5p	MIMAT0004748	ZNF282	8427	NM_003575	ZNF282	1	1	1	0	0	1	0	0	1	1	1	1	8
hsa-miR-423-5p	MIMAT0004748	CUL3	8452	NM_003590	CUL3	1	1	1	0	0	1	0	0	1	1	1	1	8
hsa-miR-423-5p	MIMAT0004748	PIK3R3	8503	NM_003629	PIK3R3	1	1	1	0	0	1	0	0	1	1	1	1	8
hsa-miR-423-5p	MIMAT0004748	ENC1	8507	NM_001256574	ENC1	1	1	1	0	0	1	0	1	0	1	1	1	8
hsa-miR-423-5p	MIMAT0004748	MKNK1	8569	NM_003684	MKNK1	1	1	0	0	0	1	0	1	1	1	1	1	8
hsa-miR-423-5p	MIMAT0004748	SSNA1	8636	NM_003731	SSNA1	1	1	1	0	0	1	0	0	1	1	1	1	8
hsa-miR-423-5p	MIMAT0004748	ALDH4A1	8659	NM_003748	ALDH4A1	1	1	1	0	0	1	0	0	1	1	1	1	8
hsa-miR-423-5p	MIMAT0004748	APLN	8862	NM_017413	APLN	1	1	1	0	0	1	0	0	1	1	1	1	8
hsa-miR-423-5p	MIMAT0004748	RPS6KA4	8986	NM_003942	RPS6KA4	1	1	1	0	1	1	0	0	0	1	1	1	8
hsa-miR-423-5p	MIMAT0004748	HAP1	9001	NM_177977	HAP1	1	1	1	0	1	1	0	0	0	1	1	1	8
hsa-miR-423-5p	MIMAT0004748	USP2	9099	XM_005271721	USP2	1	1	1	1	0	1	0	0	0	1	1	1	8
hsa-miR-423-5p	MIMAT0004748	SYNGR3	9143	NM_004209	SYNGR3	1	1	1	0	0	1	0	0	1	1	1	1	8
hsa-miR-423-5p	MIMAT0004748	SYNGR1	9145	NM_004711	SYNGR1	1	1	1	0	0	1	0	0	1	1	1	1	8
hsa-miR-423-5p	MIMAT0004748	GPR55	9290	NM_005683	GPR55	1	1	1	0	0	1	0	0	1	1	1	1	8
hsa-miR-423-5p	MIMAT0004748	KIF3B	9371	NM_004798	KIF3B	1	1	1	0	0	1	0	0	1	1	1	1	8
hsa-miR-423-5p	MIMAT0004748	HS6ST1	9394	NM_004807	HS6ST1	1	1	1	0	0	1	0	0	1	1	1	1	8
hsa-miR-423-5p	MIMAT0004748	NTN1	9423	NM_004822	NTN1	1	1	1	0	0	1	0	0	1	1	1	1	8
hsa-miR-423-5p	MIMAT0004748	PPM1F	9647	NM_014634	PPM1F	1	1	1	0	0	1	0	0	1	1	1	1	8
hsa-miR-423-5p	MIMAT0004748	N4BP1	9683	NM_153029	N4BP1	1	1	1	0	0	1	0	0	1	1	1	1	8
hsa-miR-423-5p	MIMAT0004748	PLEKHM1	9842	NM_014798	PLEKHM1	1	1	1	0	0	1	0	0	1	1	1	1	8
hsa-miR-423-5p	MIMAT0004748	SRGAP3	9901	NM_014850	SRGAP3	1	1	1	1	0	1	0	0	0	1	1	1	8
hsa-miR-423-5p	MIMAT0004748	NAALADL1	10004	NM_005468	NAALADL1	0	1	1	0	1	1	0	0	1	1	1	1	8
hsa-miR-423-5p	MIMAT0004748	HCN4	10021	NM_005477	HCN4	1	1	1	0	0	1	0	0	1	1	1	1	8
hsa-miR-423-5p	MIMAT0004748	FRAT1	10023	NM_005479	FRAT1	1	1	1	0	0	1	0	0	1	1	1	1	8
hsa-miR-423-5p	MIMAT0004748	SLC17A4	10050	NM_005495	SLC17A4	1	1	1	0	0	1	0	0	1	1	1	1	8
hsa-miR-423-5p	MIMAT0004748	ABCF2	10061	NM_007189	ABCF2	1	1	1	0	0	1	0	0	1	1	1	1	8
hsa-miR-423-5p	MIMAT0004748	TSPAN3	10099	NM_005724	TSPAN3	1	1	1	0	1	1	0	0	0	1	1	1	8
hsa-miR-423-5p	MIMAT0004748	WASF2	10163	NM_006990	WASF2	1	1	1	0	0	1	0	0	1	1	1	1	8
hsa-miR-423-5p	MIMAT0004748	PSME3	10197	NM_001267045	PSME3	1	1	1	0	0	1	0	1	0	1	1	1	8
hsa-miR-423-5p	MIMAT0004748	CORO2B	10391	NM_001190457	CORO2B	1	1	1	0	1	1	0	0	0	1	1	1	8
hsa-miR-423-5p	MIMAT0004748	NXF1	10482	NM_001081491	NXF1	1	1	1	0	0	1	0	0	1	1	1	1	8
hsa-miR-423-5p	MIMAT0004748	DPYSL4	10570	NM_006426	DPYSL4	1	1	1	0	0	1	0	0	1	1	1	1	8
hsa-miR-423-5p	MIMAT0004748	MXD4	10608	NM_006454	MXD4	1	1	1	0	0	1	0	0	1	1	1	1	8
hsa-miR-423-5p	MIMAT0004748	IGF2BP1	10642	NM_006546	IGF2BP1	1	1	1	0	0	1	0	0	1	1	1	1	8
hsa-miR-423-5p	MIMAT0004748	CELF2	10659	NM_001025077	CELF2	0	1	1	1	0	1	0	0	1	1	1	1	8
hsa-miR-423-5p	MIMAT0004748	KDM5B	10765	NM_006618	KDM5B	1	1	1	0	0	1	0	0	1	1	1	1	8
hsa-miR-423-5p	MIMAT0004748	ALDH1L1	10840	NM_012190	ALDH1L1	1	1	1	0	0	1	0	0	1	1	1	1	8
hsa-miR-423-5p	MIMAT0004748	CYP46A1	10858	NM_006668	CYP46A1	1	1	1	0	0	1	0	0	1	1	1	1	8
hsa-miR-423-5p	MIMAT0004748	SLC27A4	10999	NM_005094	SLC27A4	1	1	1	0	0	1	0	0	1	1	1	1	8
hsa-miR-423-5p	MIMAT0004748	ADAM30	11085	NM_021794	ADAM30	1	1	1	0	0	1	0	0	1	1	1	1	8
hsa-miR-423-5p	MIMAT0004748	KAT7	11143	NM_007067	KAT7	1	1	0	0	0	1	0	1	1	1	1	1	8
hsa-miR-423-5p	MIMAT0004748	PADI2	11240	NM_007365	PADI2	1	1	1	0	0	1	0	0	1	1	1	1	8
hsa-miR-423-5p	MIMAT0004748	NXPH4	11247	NM_007224	NXPH4	1	1	1	0	0	1	0	0	1	1	1	1	8
hsa-miR-423-5p	MIMAT0004748	PDAP1	11333	NM_014891	PDAP1	1	1	1	0	0	1	0	0	1	1	1	1	8
hsa-miR-423-5p	MIMAT0004748	DLGAP4	22839	NM_014902	DLGAP4	1	1	1	1	0	1	0	0	0	1	1	1	8
hsa-miR-423-5p	MIMAT0004748	KDM2A	22992	NM_012308	KDM2A	1	1	1	0	0	1	0	1	1	0	1	1	8
hsa-miR-423-5p	MIMAT0004748	ERC1	23085	NM_178040	ERC1	1	1	1	0	1	1	0	0	0	1	1	1	8
hsa-miR-423-5p	MIMAT0004748	CDK19	23097	NM_015076	CDK19	1	1	1	0	0	1	0	0	1	1	1	1	8
hsa-miR-423-5p	MIMAT0004748	KDM6B	23135	NM_001080424	KDM6B	1	1	1	0	0	1	0	0	1	1	1	1	8
hsa-miR-423-5p	MIMAT0004748	NBEAL2	23218	NM_015175	NBEAL2	1	1	1	0	0	1	0	1	1	0	1	1	8
hsa-miR-423-5p	MIMAT0004748	ZC3H7B	23264	NM_017590	ZC3H7B	1	1	1	0	0	1	0	0	1	1	1	1	8
hsa-miR-423-5p	MIMAT0004748	CTDNEP1	23399	NM_015343	CTDNEP1	1	1	1	0	0	1	0	0	1	1	1	1	8
hsa-miR-423-5p	MIMAT0004748	ANGPTL2	23452	NM_012098	ANGPTL2	1	1	1	0	0	1	0	0	1	1	1	1	8
hsa-miR-423-5p	MIMAT0004748	NPTXR	23467	NM_014293	NPTXR	1	1	1	0	0	1	0	0	1	1	1	1	8
hsa-miR-423-5p	MIMAT0004748	DAAM2	23500	NM_015345	DAAM2	1	1	1	0	0	1	0	0	1	1	1	1	8
hsa-miR-423-5p	MIMAT0004748	OSBP2	23762	NM_030758	OSBP2	1	1	1	0	0	1	0	0	1	1	1	1	8
hsa-miR-423-5p	MIMAT0004748	DCAF12	25853	NM_015397	DCAF12	1	1	0	1	0	1	0	0	1	1	1	1	8
hsa-miR-423-5p	MIMAT0004748	SNED1	25992	NM_001080437	SNED1	1	1	1	0	0	1	0	0	1	1	1	1	8
hsa-miR-423-5p	MIMAT0004748	CCDC69	26112	NM_015621	CCDC69	1	1	0	1	0	1	0	0	1	1	1	1	8
hsa-miR-423-5p	MIMAT0004748	GMEB2	26205	NM_012384	GMEB2	1	1	1	0	0	1	0	0	1	1	1	1	8
hsa-miR-423-5p	MIMAT0004748	FAM155B	27112	NM_015686	FAM155B	1	1	0	0	0	1	0	1	1	1	1	1	8
hsa-miR-423-5p	MIMAT0004748	STK39	27347	NM_013233	STK39	1	1	0	0	0	1	0	1	1	1	1	1	8
hsa-miR-423-5p	MIMAT0004748	CCDC113	29070	NM_014157	CCDC113	1	1	1	0	0	1	0	0	1	1	1	1	8
hsa-miR-423-5p	MIMAT0004748	PACSIN1	29993	NM_020804	PACSIN1	1	1	1	0	0	1	0	0	1	1	1	1	8
hsa-miR-423-5p	MIMAT0004748	CDR2L	30850	NM_014603	CDR2L	1	1	1	0	0	1	0	0	1	1	1	1	8
hsa-miR-423-5p	MIMAT0004748	ST8SIA3	51046	NM_015879	ST8SIA3	1	1	1	0	0	1	0	0	1	1	1	1	8
hsa-miR-423-5p	MIMAT0004748	NAGPA	51172	NM_016256	NAGPA	1	1	1	0	0	1	0	0	1	1	1	1	8
hsa-miR-423-5p	MIMAT0004748	RAB9B	51209	NM_016370	RAB9B	1	1	1	0	0	1	0	0	1	1	1	1	8
hsa-miR-423-5p	MIMAT0004748	HEMK1	51409	NM_016173	HEMK1	1	1	1	0	0	1	0	0	1	1	1	1	8
hsa-miR-423-5p	MIMAT0004748	RAB6B	51560	NM_016577	RAB6B	1	1	1	0	0	1	0	0	1	1	1	1	8
hsa-miR-423-5p	MIMAT0004748	CALML5	51806	NM_017422	CALML5	1	1	1	0	0	1	0	0	1	1	1	1	8
hsa-miR-423-5p	MIMAT0004748	FXYD6	53826	NM_001164836	FXYD6	1	1	1	1	0	1	0	0	0	1	1	1	8
hsa-miR-423-5p	MIMAT0004748	GPR173	54328	NM_018969	GPR173	1	1	1	0	0	1	0	0	1	1	1	1	8
hsa-miR-423-5p	MIMAT0004748	SASH3	54440	NM_018990	SASH3	1	1	1	0	0	1	0	0	1	1	1	1	8
hsa-miR-423-5p	MIMAT0004748	INO80	54617	NM_017553	INO80	1	1	1	0	0	1	0	0	1	1	1	1	8
hsa-miR-423-5p	MIMAT0004748	CC2D1A	54862	NM_017721	CC2D1A	1	1	1	0	0	1	0	0	1	1	1	1	8
hsa-miR-423-5p	MIMAT0004748	ALKBH5	54890	NM_017758	ALKBH5	1	1	1	0	1	1	0	0	1	0	1	1	8
hsa-miR-423-5p	MIMAT0004748	RNF43	54894	NM_017763	RNF43	1	1	1	0	0	1	0	0	1	1	1	1	8
hsa-miR-423-5p	MIMAT0004748	MSL2	55167	NM_018133	MSL2	1	1	0	1	0	1	0	0	1	1	1	1	8
hsa-miR-423-5p	MIMAT0004748	TRIM62	55223	NM_018207	TRIM62	1	1	1	0	0	1	0	0	1	1	1	1	8
hsa-miR-423-5p	MIMAT0004748	STK32B	55351	NM_018401	STK32B	1	1	1	0	0	1	0	0	1	1	1	1	8
hsa-miR-423-5p	MIMAT0004748	IPO9	55705	NM_018085	IPO9	1	1	1	0	0	1	0	0	1	1	1	1	8
hsa-miR-423-5p	MIMAT0004748	DOK4	55715	NM_018110	DOK4	1	1	1	0	0	1	0	0	1	1	1	1	8
hsa-miR-423-5p	MIMAT0004748	2018-09-11	55752	NM_018243	2018-09-11	1	1	1	0	0	1	0	0	1	1	1	1	8
hsa-miR-423-5p	MIMAT0004748	H2AFJ	55766	NM_177925	H2AFJ	1	1	1	0	0	1	0	0	1	1	1	1	8
hsa-miR-423-5p	MIMAT0004748	2018-09-03	55964	NM_019106	2018-09-03	1	1	1	0	0	1	0	0	1	1	1	1	8
hsa-miR-423-5p	MIMAT0004748	RGMA	56963	NM_020211	RGMA	1	1	1	0	0	1	0	0	1	1	1	1	8
hsa-miR-423-5p	MIMAT0004748	TOMM22	56993	NM_020243	TOMM22	1	1	1	0	0	1	0	0	1	1	1	1	8
hsa-miR-423-5p	MIMAT0004748	PLSCR3	57048	NM_020360	PLSCR3	1	1	1	0	0	1	0	0	1	1	1	1	8
hsa-miR-423-5p	MIMAT0004748	DOLPP1	57171	NM_020438	DOLPP1	1	1	1	0	1	1	0	0	1	0	1	1	8
hsa-miR-423-5p	MIMAT0004748	CASKIN2	57513	NM_020753	CASKIN2	1	1	1	0	0	1	0	0	1	1	1	1	8
hsa-miR-423-5p	MIMAT0004748	SORCS2	57537	NM_020777	SORCS2	1	1	1	0	0	1	0	0	1	1	1	1	8
hsa-miR-423-5p	MIMAT0004748	ALPK3	57538	NM_020778	ALPK3	1	1	1	0	0	1	0	0	1	1	1	1	8
hsa-miR-423-5p	MIMAT0004748	NLGN2	57555	NM_020795	NLGN2	1	1	1	0	0	1	0	0	1	1	1	1	8
hsa-miR-423-5p	MIMAT0004748	USP35	57558	NM_020798	USP35	1	1	1	0	0	1	0	0	1	1	1	1	8
hsa-miR-423-5p	MIMAT0004748	ZBTB4	57659	NM_020899	ZBTB4	1	1	1	0	0	1	0	0	1	1	1	1	8
hsa-miR-423-5p	MIMAT0004748	UBE2O	63893	NM_022066	UBE2O	1	1	1	0	0	1	0	0	1	1	1	1	8
hsa-miR-423-5p	MIMAT0004748	TSPYL2	64061	NM_022117	TSPYL2	0	1	1	0	0	1	0	1	1	1	1	1	8
hsa-miR-423-5p	MIMAT0004748	XYLT1	64131	NM_022166	XYLT1	1	1	1	0	0	1	0	0	1	1	1	1	8
hsa-miR-423-5p	MIMAT0004748	IRF2BPL	64207	NM_024496	IRF2BPL	1	1	1	0	0	1	0	0	1	1	1	1	8
hsa-miR-423-5p	MIMAT0004748	ZNF106	64397	NM_022473	ZNF106	1	1	1	0	0	1	0	0	1	1	1	1	8
hsa-miR-423-5p	MIMAT0004748	WBSCR17	64409	NM_022479	WBSCR17	1	1	1	0	0	1	0	0	1	1	1	1	8
hsa-miR-423-5p	MIMAT0004748	ZDHHC6	64429	XM_005270051	ZDHHC6	1	1	1	1	0	1	0	0	0	1	1	1	8
hsa-miR-423-5p	MIMAT0004748	LPPR2	64748	NM_022737	LPPR2	1	1	1	0	0	1	0	0	1	1	1	1	8
hsa-miR-423-5p	MIMAT0004748	CREB3L2	64764	NM_194071	CREB3L2	1	1	1	0	0	1	0	0	1	1	1	1	8
hsa-miR-423-5p	MIMAT0004748	FAM129B	64855	NM_022833	FAM129B	1	1	1	0	0	1	0	1	0	1	1	1	8
hsa-miR-423-5p	MIMAT0004748	LYNX1	66004	NM_177457	LYNX1	1	1	1	0	1	1	0	0	0	1	1	1	8
hsa-miR-423-5p	MIMAT0004748	OTUB2	78990	NM_023112	OTUB2	1	1	1	0	0	1	0	0	1	1	1	1	8
hsa-miR-423-5p	MIMAT0004748	DDX54	79039	NM_001111322	DDX54	1	1	1	0	1	1	0	0	0	1	1	1	8
hsa-miR-423-5p	MIMAT0004748	KCTD15	79047	NM_024076	KCTD15	1	1	1	0	0	1	0	0	1	1	1	1	8
hsa-miR-423-5p	MIMAT0004748	FA2H	79152	NM_024306	FA2H	1	1	1	0	0	1	0	0	1	1	1	1	8
hsa-miR-423-5p	MIMAT0004748	THTPA	79178	NM_024328	THTPA	1	1	1	0	0	1	0	1	1	0	1	1	8
hsa-miR-423-5p	MIMAT0004748	C10orf76	79591	NM_024541	C10orf76	1	1	1	0	0	1	0	0	1	1	1	1	8
hsa-miR-423-5p	MIMAT0004748	HMBOX1	79618	XM_005273634	HMBOX1	1	1	1	1	0	1	0	0	0	1	1	1	8
hsa-miR-423-5p	MIMAT0004748	HECTD3	79654	NM_024602	HECTD3	1	1	1	0	0	1	0	0	1	1	1	1	8
hsa-miR-423-5p	MIMAT0004748	CPSF7	79869	NM_024811	CPSF7	1	1	1	0	0	1	0	0	1	1	1	1	8
hsa-miR-423-5p	MIMAT0004748	GRHL2	79977	NM_024915	GRHL2	1	1	1	0	0	1	0	0	1	1	1	1	8
hsa-miR-423-5p	MIMAT0004748	SVEP1	79987	NM_153366	SVEP1	1	1	1	0	0	1	0	0	1	1	1	1	8
hsa-miR-423-5p	MIMAT0004748	DCAF17	80067	NM_025000	DCAF17	1	1	0	1	0	1	0	0	1	1	1	1	8
hsa-miR-423-5p	MIMAT0004748	OPA3	80207	NM_025136	OPA3	1	1	1	0	0	1	0	0	1	1	1	1	8
hsa-miR-423-5p	MIMAT0004748	C16orf70	80262	NM_025187	C16orf70	1	1	1	0	0	1	0	0	1	1	1	1	8
hsa-miR-423-5p	MIMAT0004748	AKNA	80709	NM_030767	AKNA	1	1	1	0	0	1	0	0	1	1	1	1	8
hsa-miR-423-5p	MIMAT0004748	SRCIN1	80725	NM_025248	SRCIN1	1	1	1	0	0	1	0	0	1	1	1	1	8
hsa-miR-423-5p	MIMAT0004748	FAM117A	81558	NM_030802	FAM117A	0	1	1	1	0	1	0	0	1	1	1	1	8
hsa-miR-423-5p	MIMAT0004748	ADAMTS10	81794	NM_030957	ADAMTS10	1	1	1	0	0	1	0	0	1	1	1	1	8
hsa-miR-423-5p	MIMAT0004748	GUCD1	83606	NM_031444	GUCD1	1	1	1	0	0	1	0	0	1	1	1	1	8
hsa-miR-423-5p	MIMAT0004748	KLF16	83855	NM_031918	KLF16	1	1	1	0	0	1	0	0	1	1	1	1	8
hsa-miR-423-5p	MIMAT0004748	MRO	83876	NM_031939	MRO	1	1	1	0	0	1	0	0	1	1	1	1	8
hsa-miR-423-5p	MIMAT0004748	FAM172A	83989	NM_032042	FAM172A	1	1	1	0	0	1	0	0	1	1	1	1	8
hsa-miR-423-5p	MIMAT0004748	NICN1	84276	NM_032316	NICN1	1	1	1	0	0	1	0	0	1	1	1	1	8
hsa-miR-423-5p	MIMAT0004748	KIRREL3	84623	NM_032531	KIRREL3	1	1	1	0	0	1	0	1	0	1	1	1	8
hsa-miR-423-5p	MIMAT0004748	SLC35B4	84912	NM_032826	SLC35B4	1	1	1	0	0	1	0	0	1	1	1	1	8
hsa-miR-423-5p	MIMAT0004748	FAM222A	84915	NM_032829	FAM222A	1	1	1	0	0	1	0	0	1	1	1	1	8
hsa-miR-423-5p	MIMAT0004748	ZNRF1	84937	NM_032268	ZNRF1	1	1	0	0	0	1	0	1	1	1	1	1	8
hsa-miR-423-5p	MIMAT0004748	SMIM3	85027	NM_032947	SMIM3	1	1	1	0	0	1	0	0	1	1	1	1	8
hsa-miR-423-5p	MIMAT0004748	MICALL1	85377	NM_033386	MICALL1	1	1	1	0	0	1	0	0	1	1	1	1	8
hsa-miR-423-5p	MIMAT0004748	UNK	85451	NM_001080419	UNK	1	1	1	0	0	1	0	0	1	1	1	1	8
hsa-miR-423-5p	MIMAT0004748	HPS4	89781	NM_022081	HPS4	1	1	1	0	1	1	0	0	0	1	1	1	8
hsa-miR-423-5p	MIMAT0004748	FCHSD1	89848	NM_033449	FCHSD1	1	1	1	0	0	1	0	0	1	1	1	1	8
hsa-miR-423-5p	MIMAT0004748	SYS1	90196	NM_001099791	SYS1	1	1	1	0	0	1	0	0	1	1	1	1	8
hsa-miR-423-5p	MIMAT0004748	LRRC46	90506	NM_033413	LRRC46	1	1	1	1	0	1	0	0	1	0	1	1	8
hsa-miR-423-5p	MIMAT0004748	PLXNA4	91584	NM_020911	PLXNA4	1	1	1	0	0	1	0	0	1	1	1	1	8
hsa-miR-423-5p	MIMAT0004748	PGAP3	93210	NM_033419	PGAP3	1	1	1	0	0	1	0	0	1	1	1	1	8
hsa-miR-423-5p	MIMAT0004748	STX1B	112755	NM_052874	STX1B	1	1	1	0	0	1	0	0	1	1	1	1	8
hsa-miR-423-5p	MIMAT0004748	NACC1	112939	NM_052876	NACC1	1	1	1	0	0	1	0	0	1	1	1	1	8
hsa-miR-423-5p	MIMAT0004748	RPUSD1	113000	NM_058192	RPUSD1	1	1	1	0	0	1	0	0	1	1	1	1	8
hsa-miR-423-5p	MIMAT0004748	GPRIN1	114787	NM_052899	GPRIN1	1	1	1	0	0	1	0	0	1	1	1	1	8
hsa-miR-423-5p	MIMAT0004748	ELFN2	114794	NM_052906	ELFN2	1	1	1	0	0	1	0	0	1	1	1	1	8
hsa-miR-423-5p	MIMAT0004748	TRMT61A	115708	NM_152307	TRMT61A	1	1	1	0	0	1	0	0	1	1	1	1	8
hsa-miR-423-5p	MIMAT0004748	FOXP4	116113	NM_001012426	FOXP4	1	1	1	0	1	1	0	0	0	1	1	1	8
hsa-miR-423-5p	MIMAT0004748	UBALD1	124402	NM_145253	UBALD1	0	1	1	0	0	1	0	1	1	1	1	1	8
hsa-miR-423-5p	MIMAT0004748	USH1G	124590	NM_173477	USH1G	1	1	1	0	0	1	0	0	1	1	1	1	8
hsa-miR-423-5p	MIMAT0004748	ANKRD13B	124930	NM_152345	ANKRD13B	1	1	1	0	0	1	0	0	1	1	1	1	8
hsa-miR-423-5p	MIMAT0004748	SLC43A2	124935	NM_152346	SLC43A2	1	1	1	0	0	1	0	0	1	1	1	1	8
hsa-miR-423-5p	MIMAT0004748	CYP4F22	126410	NM_173483	CYP4F22	1	1	1	0	0	1	0	1	1	0	1	1	8
hsa-miR-423-5p	MIMAT0004748	TBC1D20	128637	NM_144628	TBC1D20	1	1	1	0	0	1	0	0	1	1	1	1	8
hsa-miR-423-5p	MIMAT0004748	TANGO2	128989	NM_152906	TANGO2	1	1	1	0	0	1	0	0	1	1	1	1	8
hsa-miR-423-5p	MIMAT0004748	TMEM150A	129303	NM_001031738	TMEM150A	1	1	1	0	1	1	0	0	0	1	1	1	8
hsa-miR-423-5p	MIMAT0004748	LRRC15	131578	NM_001135057	LRRC15	1	1	1	0	1	1	0	0	0	1	1	1	8
hsa-miR-423-5p	MIMAT0004748	C5orf20	140947	NM_130848	C5orf20	1	1	1	0	0	1	0	0	1	1	1	1	8
hsa-miR-423-5p	MIMAT0004748	VTI1A	143187	NM_145206	VTI1A	1	1	1	0	0	1	0	0	1	1	1	1	8
hsa-miR-423-5p	MIMAT0004748	FBXL16	146330	NM_153350	FBXL16	1	1	1	0	0	1	0	0	1	1	1	1	8
hsa-miR-423-5p	MIMAT0004748	NOTUM	147111	NM_178493	NOTUM	1	1	1	0	0	1	0	0	1	1	1	1	8
hsa-miR-423-5p	MIMAT0004748	FBXO41	150726	NM_001080410	FBXO41	1	1	1	0	0	1	0	0	1	1	1	1	8
hsa-miR-423-5p	MIMAT0004748	VPS37D	155382	NM_001077621	VPS37D	0	1	1	0	0	1	0	1	1	1	1	1	8
hsa-miR-423-5p	MIMAT0004748	RHBDL3	162494	NM_138328	RHBDL3	1	1	1	0	0	1	0	0	1	1	1	1	8
hsa-miR-423-5p	MIMAT0004748	DEDD2	162989	NM_133328	DEDD2	1	1	1	0	0	1	0	0	1	1	1	1	8
hsa-miR-423-5p	MIMAT0004748	PRICKLE2	166336	NM_198859	PRICKLE2	1	1	1	0	0	1	0	0	1	1	1	1	8
hsa-miR-423-5p	MIMAT0004748	PLBD2	196463	NM_173542	PLBD2	1	1	1	0	0	1	0	0	1	1	1	1	8
hsa-miR-423-5p	MIMAT0004748	GRAMD2	196996	NM_001012642	GRAMD2	1	1	1	0	0	1	0	0	1	1	1	1	8
hsa-miR-423-5p	MIMAT0004748	CRTC2	200186	NM_181715	CRTC2	0	1	1	0	0	1	0	1	1	1	1	1	8
hsa-miR-423-5p	MIMAT0004748	LGI3	203190	NM_139278	LGI3	1	1	1	0	0	1	0	0	1	1	1	1	8
hsa-miR-423-5p	MIMAT0004748	FAM219A	203259	NM_001184940	FAM219A	1	1	1	0	1	1	0	0	0	1	1	1	8
hsa-miR-423-5p	MIMAT0004748	ZCCHC24	219654	NM_153367	ZCCHC24	1	1	1	0	0	1	0	0	1	1	1	1	8
hsa-miR-423-5p	MIMAT0004748	UNC5B	219699	NM_170744	UNC5B	1	1	1	0	0	1	0	0	1	1	1	1	8
hsa-miR-423-5p	MIMAT0004748	C6orf223	221416	NM_001171992	C6orf223	1	1	1	0	1	1	0	0	0	1	1	1	8
hsa-miR-423-5p	MIMAT0004748	KIF6	221458	NM_145027	KIF6	1	1	1	0	0	1	0	0	1	1	1	1	8
hsa-miR-423-5p	MIMAT0004748	PI16	221476	NM_153370	PI16	1	1	1	0	0	1	0	0	1	1	1	1	8
hsa-miR-423-5p	MIMAT0004748	PHYHD1	254295	NM_001100876	PHYHD1	1	1	1	1	0	1	0	0	0	1	1	1	8
hsa-miR-423-5p	MIMAT0004748	CALHM1	255022	NM_001001412	CALHM1	1	1	1	0	0	1	0	0	1	1	1	1	8
hsa-miR-423-5p	MIMAT0004748	FRMD3	257019	NM_174938	FRMD3	1	1	1	0	1	1	0	0	0	1	1	1	8
hsa-miR-423-5p	MIMAT0004748	HID1	283987	NM_030630	HID1	1	1	1	0	0	1	0	0	1	1	1	1	8
hsa-miR-423-5p	MIMAT0004748	TMEM102	284114	NM_178518	TMEM102	1	1	1	0	0	1	0	0	1	1	1	1	8
hsa-miR-423-5p	MIMAT0004748	EPHA10	284656	NM_001099439	EPHA10	1	1	1	0	0	1	0	0	1	1	1	1	8
hsa-miR-423-5p	MIMAT0004748	C3orf56	285311	NM_001007534	C3orf56	1	1	1	0	0	1	0	0	1	1	1	1	8
hsa-miR-423-5p	MIMAT0004748	C5orf51	285636	NM_175921	C5orf51	1	1	1	0	0	1	0	0	1	1	1	1	8
hsa-miR-423-5p	MIMAT0004748	ATP11C	286410	NM_173694	ATP11C	1	1	1	0	0	1	0	1	0	1	1	1	8
hsa-miR-423-5p	MIMAT0004748	VSX2	338917	NM_182894	VSX2	1	1	1	0	0	1	0	0	1	1	1	1	8
hsa-miR-423-5p	MIMAT0004748	SYCN	342898	NM_001080468	SYCN	1	1	1	0	0	1	0	0	1	1	1	1	8
hsa-miR-423-5p	MIMAT0004748	HDDC3	374659	NM_198527	HDDC3	1	1	1	0	0	1	0	0	1	1	1	1	8
hsa-miR-423-5p	MIMAT0004748	C12orf68	387856	NM_001013635	C12orf68	1	1	0	1	0	1	0	0	1	1	1	1	8
hsa-miR-423-5p	MIMAT0004748	TRNP1	388610	NM_001013642	TRNP1	1	1	1	0	0	1	0	0	1	1	1	1	8
hsa-miR-423-5p	MIMAT0004748	LYSMD1	388695	NM_212551	LYSMD1	1	1	0	1	0	1	0	0	1	1	1	1	8
hsa-miR-423-5p	MIMAT0004748	ARHGEF37	389337	NM_001001669	ARHGEF37	1	1	1	0	0	1	0	0	1	1	1	1	8
hsa-miR-423-5p	MIMAT0004748	IER5L	389792	NM_203434	IER5L	0	1	1	0	0	1	0	1	1	1	1	1	8
hsa-miR-423-5p	MIMAT0004748	SLC25A35	399512	NM_201520	SLC25A35	1	1	1	0	0	1	0	0	1	1	1	1	8
hsa-miR-423-5p	MIMAT0004748	DEFB132	400830	NM_207469	DEFB132	1	1	1	0	0	1	0	1	1	0	1	1	8
hsa-miR-423-5p	MIMAT0004748	PAIP2B	400961	NM_020459	PAIP2B	1	1	1	0	0	1	0	0	1	1	1	1	8
hsa-miR-423-5p	MIMAT0004748	FAM127C	441518	NM_001078173	FAM127C	1	1	1	0	0	1	0	0	1	1	1	1	8
hsa-miR-423-5p	MIMAT0004748	ACHE	43	NM_015831	ACHE	1	0	1	0	0	1	0	1	1	1	1	1	8
hsa-miR-423-5p	MIMAT0004748	ADRA2A	150	NM_000681	ADRA2A	1	0	1	1	0	1	0	0	1	1	1	1	8
hsa-miR-423-5p	MIMAT0004748	BGN	633	NM_001711	BGN	1	0	1	0	1	1	0	0	1	1	1	1	8
hsa-miR-423-5p	MIMAT0004748	CALM3	808	NM_005184	CALM3	1	0	1	0	1	1	0	0	1	1	1	1	8
hsa-miR-423-5p	MIMAT0004748	CLCN4	1183	NM_001830	CLCN4	1	0	1	0	1	1	0	0	1	1	1	1	8
hsa-miR-423-5p	MIMAT0004748	CLCN7	1186	NM_001287	CLCN7	1	0	1	0	1	1	0	0	1	1	1	1	8
hsa-miR-423-5p	MIMAT0004748	DAP	1611	NM_004394	DAP	1	0	1	0	1	1	0	0	1	1	1	1	8
hsa-miR-423-5p	MIMAT0004748	KRT82	3888	NM_033033	KRT82	1	0	1	0	1	1	0	0	1	1	1	1	8
hsa-miR-423-5p	MIMAT0004748	PHF2	5253	NM_005392	PHF2	1	0	1	0	1	1	0	0	1	1	1	1	8
hsa-miR-423-5p	MIMAT0004748	RGS1	5996	NM_002922	RGS1	1	0	1	0	1	1	0	0	1	1	1	1	8
hsa-miR-423-5p	MIMAT0004748	SCN4B	6330	NM_174934	SCN4B	1	0	1	1	0	1	0	0	1	1	1	1	8
hsa-miR-423-5p	MIMAT0004748	SLC20A2	6575	NM_006749	SLC20A2	1	0	1	0	1	1	0	1	1	0	1	1	8
hsa-miR-423-5p	MIMAT0004748	TEC	7006	NM_003215	TEC	1	0	1	0	1	1	0	0	1	1	1	1	8
hsa-miR-423-5p	MIMAT0004748	TRH	7200	NM_007117	TRH	1	0	1	1	0	1	0	0	1	1	1	1	8
hsa-miR-423-5p	MIMAT0004748	DNALI1	7802	NM_003462	DNALI1	1	0	1	0	1	1	0	0	1	1	1	1	8
hsa-miR-423-5p	MIMAT0004748	ZNF212	7988	NM_012256	ZNF212	1	0	1	0	0	1	0	1	1	1	1	1	8
hsa-miR-423-5p	MIMAT0004748	TMEM187	8269	NM_003492	TMEM187	1	0	1	0	1	1	0	0	1	1	1	1	8
hsa-miR-423-5p	MIMAT0004748	ZMYM4	9202	NM_005095	ZMYM4	1	0	1	0	1	1	0	1	1	0	1	1	8
hsa-miR-423-5p	MIMAT0004748	CHST3	9469	NM_004273	CHST3	1	0	1	1	0	1	0	0	1	1	1	1	8
hsa-miR-423-5p	MIMAT0004748	TMEM63A	9725	NM_014698	TMEM63A	1	0	1	1	0	1	0	0	1	1	1	1	8
hsa-miR-423-5p	MIMAT0004748	UST	10090	NM_005715	UST	1	0	1	1	0	1	0	0	1	1	1	1	8
hsa-miR-423-5p	MIMAT0004748	PRAF2	11230	NM_007213	PRAF2	1	0	1	0	1	1	0	0	1	1	1	1	8
hsa-miR-423-5p	MIMAT0004748	KIAA1045	23349	NM_015297	KIAA1045	1	0	1	0	0	1	0	1	1	1	1	1	8
hsa-miR-423-5p	MIMAT0004748	MKRN2	23609	NM_014160	MKRN2	1	0	1	0	1	1	0	0	1	1	1	1	8
hsa-miR-423-5p	MIMAT0004748	KIAA1549L	25758	NM_012194	KIAA1549L	1	0	1	0	1	1	0	0	1	1	1	1	8
hsa-miR-423-5p	MIMAT0004748	AGPAT4	56895	NM_020133	AGPAT4	1	0	1	1	0	1	0	0	1	1	1	1	8
hsa-miR-423-5p	MIMAT0004748	CXCL16	58191	NM_022059	CXCL16	1	0	1	0	1	1	0	0	1	1	1	1	8
hsa-miR-423-5p	MIMAT0004748	GREM2	64388	NM_022469	GREM2	1	0	1	1	0	1	0	0	1	1	1	1	8
hsa-miR-423-5p	MIMAT0004748	LMF1	64788	NM_022773	LMF1	1	0	1	0	1	1	0	0	1	1	1	1	8
hsa-miR-423-5p	MIMAT0004748	WNT3A	89780	NM_033131	WNT3A	1	0	1	0	1	1	0	0	1	1	1	1	8
hsa-miR-423-5p	MIMAT0004748	SLC52A3	113278	NM_033409	SLC52A3	1	0	1	0	1	1	0	0	1	1	1	1	8
hsa-miR-423-5p	MIMAT0004748	OSCAR	126014	NM_206818	OSCAR	1	0	1	0	1	1	0	0	1	1	1	1	8
hsa-miR-423-5p	MIMAT0004748	RTP1	132112	NM_153708	RTP1	1	0	1	0	1	1	0	0	1	1	1	1	8
hsa-miR-423-5p	MIMAT0004748	RIMS4	140730	NM_182970	RIMS4	1	0	1	0	1	1	0	1	1	0	1	1	8
hsa-miR-423-5p	MIMAT0004748	ZBTB9	221504	NM_152735	ZBTB9	1	0	1	0	1	1	0	0	1	1	1	1	8
hsa-miR-423-5p	MIMAT0004748	NAT8L	339983	NM_178557	NAT8L	1	0	1	0	1	1	0	0	1	1	1	1	8
hsa-miR-423-5p	MIMAT0004748	ZNF445	353274	NM_181489	ZNF445	1	0	1	1	0	1	0	0	1	1	1	1	8
hsa-miR-423-5p	MIMAT0004748	TMEM110	375346	NM_198563	TMEM110	1	0	1	0	0	1	0	1	1	1	1	1	8
hsa-miR-423-5p	MIMAT0004748	NAT16	375607	NM_198571	NAT16	1	0	1	0	1	1	0	0	1	1	1	1	8
hsa-miR-423-5p	MIMAT0004748	TSPYL6	388951	NM_001003937	TSPYL6	1	0	1	0	0	1	0	1	1	1	1	1	8
hsa-miR-423-5p	MIMAT0004748	RNF165	494470	NM_152470	RNF165	1	0	1	0	1	1	0	1	1	0	1	1	8
hsa-miR-423-5p	MIMAT0004748	ACVR1B	91	NM_020328	ACVR1B	1	1	1	0	0	1	0	0	0	1	1	1	7
hsa-miR-423-5p	MIMAT0004748	ADCY5	111	XM_005247077	ADCY5	1	1	1	0	0	1	0	0	0	1	1	1	7
hsa-miR-423-5p	MIMAT0004748	AP1B1	162	XM_005261378	AP1B1	1	1	1	0	0	1	0	0	0	1	1	1	7
hsa-miR-423-5p	MIMAT0004748	ALDOC	230	XM_005257947	ALDOC	1	1	1	0	0	1	0	0	0	1	1	1	7
hsa-miR-423-5p	MIMAT0004748	ALPL	249	NM_000478	ALPL	1	1	0	0	0	1	0	0	1	1	1	1	7
hsa-miR-423-5p	MIMAT0004748	APBA1	320	NM_001163	APBA1	1	1	1	0	0	1	0	0	1	0	1	1	7
hsa-miR-423-5p	MIMAT0004748	ARF3	377	XM_005268856	ARF3	1	1	1	0	0	1	0	0	0	1	1	1	7
hsa-miR-423-5p	MIMAT0004748	ARRB2	409	NM_001257328	ARRB2	1	1	1	0	0	1	0	0	0	1	1	1	7
hsa-miR-423-5p	MIMAT0004748	ZFHX3	463	NM_006885	ZFHX3	1	1	0	0	0	1	0	0	1	1	1	1	7
hsa-miR-423-5p	MIMAT0004748	ATP2A3	489	NM_174953	ATP2A3	1	1	1	0	0	1	0	0	0	1	1	1	7
hsa-miR-423-5p	MIMAT0004748	ATP2B3	492	XM_005274692	ATP2B3	1	1	1	0	0	1	0	0	0	1	1	1	7
hsa-miR-423-5p	MIMAT0004748	ATP2B3	492	XM_005277859	ATP2B3	1	1	1	0	0	1	0	0	0	1	1	1	7
hsa-miR-423-5p	MIMAT0004748	ATP6AP1	537	NM_001183	ATP6AP1	1	1	0	0	0	1	0	0	1	1	1	1	7
hsa-miR-423-5p	MIMAT0004748	AXL	558	NM_021913	AXL	1	1	1	0	0	1	0	0	0	1	1	1	7
hsa-miR-423-5p	MIMAT0004748	BAI1	575	NM_001702	BAI1	0	1	1	0	0	1	0	1	1	0	1	1	7
hsa-miR-423-5p	MIMAT0004748	BCKDHA	593	XM_005259126	BCKDHA	1	1	1	0	0	1	0	0	0	1	1	1	7
hsa-miR-423-5p	MIMAT0004748	HCN2	610	NM_001194	HCN2	1	1	0	0	0	1	0	0	1	1	1	1	7
hsa-miR-423-5p	MIMAT0004748	CEACAM1	634	NM_001712	CEACAM1	1	1	1	0	0	1	0	0	0	1	1	1	7
hsa-miR-423-5p	MIMAT0004748	BICD1	636	XM_005253465	BICD1	1	1	1	0	0	1	0	0	0	1	1	1	7
hsa-miR-423-5p	MIMAT0004748	BNIP1	662	NM_013979	BNIP1	1	1	1	0	0	1	0	0	0	1	1	1	7
hsa-miR-423-5p	MIMAT0004748	ZFP36L1	677	NM_004926	ZFP36L1	1	1	0	0	0	1	0	0	1	1	1	1	7
hsa-miR-423-5p	MIMAT0004748	BTK	695	NM_000061	BTK	1	1	1	0	0	1	0	0	1	0	1	1	7
hsa-miR-423-5p	MIMAT0004748	MYRF	745	XM_005274222	MYRF	1	1	1	0	0	1	0	0	0	1	1	1	7
hsa-miR-423-5p	MIMAT0004748	LDLRAD4	753	NM_001003674	LDLRAD4	1	1	1	0	0	1	0	0	0	1	1	1	7
hsa-miR-423-5p	MIMAT0004748	CASP9	842	NM_001229	CASP9	1	1	1	0	0	1	0	0	0	1	1	1	7
hsa-miR-423-5p	MIMAT0004748	CBFA2T3	863	NM_005187	CBFA2T3	1	1	1	0	0	1	0	0	0	1	1	1	7
hsa-miR-423-5p	MIMAT0004748	CD4	920	NM_001195014	CD4	1	1	1	0	0	1	0	0	0	1	1	1	7
hsa-miR-423-5p	MIMAT0004748	CD5L	922	NM_005894	CD5L	1	1	0	0	0	1	0	0	1	1	1	1	7
hsa-miR-423-5p	MIMAT0004748	ENTPD1	953	NM_001776	ENTPD1	1	1	1	0	0	1	0	0	0	1	1	1	7
hsa-miR-423-5p	MIMAT0004748	CDKN1C	1028	NM_000076	CDKN1C	1	1	1	1	0	1	0	0	0	0	1	1	7
hsa-miR-423-5p	MIMAT0004748	RCC1	1104	NM_001048199	RCC1	1	1	1	0	0	1	0	0	0	1	1	1	7
hsa-miR-423-5p	MIMAT0004748	CHD3	1107	XM_005256427	CHD3	1	1	1	0	0	1	0	0	0	1	1	1	7
hsa-miR-423-5p	MIMAT0004748	FOXN3	1112	XM_005267289	FOXN3	1	1	1	0	0	1	0	0	0	1	1	1	7
hsa-miR-423-5p	MIMAT0004748	CHM	1121	NM_000390	CHM	0	1	1	0	0	1	0	0	1	1	1	1	7
hsa-miR-423-5p	MIMAT0004748	CHRNG	1146	NM_005199	CHRNG	1	1	0	0	0	1	0	0	1	1	1	1	7
hsa-miR-423-5p	MIMAT0004748	CNP	1267	NM_033133	CNP	1	1	1	0	0	1	0	0	1	0	1	1	7
hsa-miR-423-5p	MIMAT0004748	COL9A2	1298	NM_001852	COL9A2	1	1	0	1	0	1	0	0	1	0	1	1	7
hsa-miR-423-5p	MIMAT0004748	CREBL2	1389	NM_001310	CREBL2	1	1	0	0	0	1	0	0	1	1	1	1	7
hsa-miR-423-5p	MIMAT0004748	CSF1	1435	NM_000757	CSF1	1	1	1	0	0	1	0	0	0	1	1	1	7
hsa-miR-423-5p	MIMAT0004748	CSNK1G2	1455	XM_005259502	CSNK1G2	1	1	1	0	0	1	0	0	0	1	1	1	7
hsa-miR-423-5p	MIMAT0004748	CSNK2A2	1459	NM_001896	CSNK2A2	1	1	1	0	0	1	0	0	1	0	1	1	7
hsa-miR-423-5p	MIMAT0004748	SLC25A10	1468	NM_001270888	SLC25A10	1	1	1	0	0	1	0	0	0	1	1	1	7
hsa-miR-423-5p	MIMAT0004748	CTSD	1509	NM_001909	CTSD	0	1	1	0	0	1	0	0	1	1	1	1	7
hsa-miR-423-5p	MIMAT0004748	DBN1	1627	NM_080881	DBN1	0	1	1	0	0	1	0	1	0	1	1	1	7
hsa-miR-423-5p	MIMAT0004748	DES	1674	NM_001927	DES	1	1	0	0	0	1	0	0	1	1	1	1	7
hsa-miR-423-5p	MIMAT0004748	DIAPH1	1729	XM_005268384	DIAPH1	1	1	1	0	0	1	0	0	0	1	1	1	7
hsa-miR-423-5p	MIMAT0004748	DLG3	1741	NM_021120	DLG3	1	1	1	0	0	1	0	0	0	1	1	1	7
hsa-miR-423-5p	MIMAT0004748	DLST	1743	NM_001933	DLST	1	1	0	0	0	1	0	0	1	1	1	1	7
hsa-miR-423-5p	MIMAT0004748	DUSP7	1849	NM_001947	DUSP7	1	1	1	0	0	1	0	0	0	1	1	1	7
hsa-miR-423-5p	MIMAT0004748	E2F3	1871	NM_001949	E2F3	1	1	0	0	0	1	0	0	1	1	1	1	7
hsa-miR-423-5p	MIMAT0004748	E2F4	1874	NM_001950	E2F4	1	1	0	0	0	1	0	0	1	1	1	1	7
hsa-miR-423-5p	MIMAT0004748	S1PR1	1901	NM_001400	S1PR1	0	1	1	0	0	1	0	0	1	1	1	1	7
hsa-miR-423-5p	MIMAT0004748	EFNB1	1947	NM_004429	EFNB1	0	1	1	0	0	1	0	0	1	1	1	1	7
hsa-miR-423-5p	MIMAT0004748	EFNB2	1948	NM_004093	EFNB2	0	1	1	0	0	1	0	0	1	1	1	1	7
hsa-miR-423-5p	MIMAT0004748	EFNB3	1949	NM_001406	EFNB3	1	1	0	0	0	1	0	0	1	1	1	1	7
hsa-miR-423-5p	MIMAT0004748	CELSR3	1951	NM_001407	CELSR3	0	1	1	0	0	1	0	0	1	1	1	1	7
hsa-miR-423-5p	MIMAT0004748	EIF4EBP1	1978	NM_004095	EIF4EBP1	1	1	1	0	0	1	0	0	1	0	1	1	7
hsa-miR-423-5p	MIMAT0004748	ELAVL3	1995	NM_001420	ELAVL3	1	1	1	0	0	1	0	0	0	1	1	1	7
hsa-miR-423-5p	MIMAT0004748	ELK1	2002	NM_001114123	ELK1	0	1	1	0	0	1	0	1	0	1	1	1	7
hsa-miR-423-5p	MIMAT0004748	ELN	2006	NM_001278939	ELN	1	1	1	0	0	1	0	0	0	1	1	1	7
hsa-miR-423-5p	MIMAT0004748	ETS1	2113	NM_005238	ETS1	1	1	0	0	0	1	0	0	1	1	1	1	7
hsa-miR-423-5p	MIMAT0004748	FGF11	2256	NM_004112	FGF11	1	1	0	0	0	1	0	0	1	1	1	1	7
hsa-miR-423-5p	MIMAT0004748	FGFR1	2260	NM_001174064	FGFR1	1	1	1	0	0	1	0	0	0	1	1	1	7
hsa-miR-423-5p	MIMAT0004748	FGFR3	2261	NM_001163213	FGFR3	1	1	1	0	0	1	0	0	0	1	1	1	7
hsa-miR-423-5p	MIMAT0004748	FUT1	2523	XM_005258712	FUT1	1	1	1	0	0	1	0	0	0	1	1	1	7
hsa-miR-423-5p	MIMAT0004748	FUT4	2526	NM_002033	FUT4	1	1	0	0	0	1	0	0	1	1	1	1	7
hsa-miR-423-5p	MIMAT0004748	GCDH	2639	NM_000159	GCDH	1	1	0	0	0	1	0	0	1	1	1	1	7
hsa-miR-423-5p	MIMAT0004748	KAT2A	2648	NM_021078	KAT2A	0	1	1	0	0	1	0	0	1	1	1	1	7
hsa-miR-423-5p	MIMAT0004748	MSTN	2660	NM_005259	MSTN	1	1	0	0	0	1	0	0	1	1	1	1	7
hsa-miR-423-5p	MIMAT0004748	GFRA3	2676	XM_005271959	GFRA3	1	1	1	0	0	1	0	0	0	1	1	1	7
hsa-miR-423-5p	MIMAT0004748	B4GALT1	2683	NM_001497	B4GALT1	1	1	0	0	0	1	0	0	1	1	1	1	7
hsa-miR-423-5p	MIMAT0004748	GJB1	2705	NM_000166	GJB1	0	1	1	0	0	1	0	1	0	1	1	1	7
hsa-miR-423-5p	MIMAT0004748	GNAI2	2771	XM_005265067	GNAI2	1	1	1	0	0	1	0	0	0	1	1	1	7
hsa-miR-423-5p	MIMAT0004748	GPD1	2819	NM_005276	GPD1	0	1	1	0	0	1	0	0	1	1	1	1	7
hsa-miR-423-5p	MIMAT0004748	MKNK2	2872	NM_199054	MKNK2	1	1	1	0	0	1	0	0	1	0	1	1	7
hsa-miR-423-5p	MIMAT0004748	GPX3	2878	NM_002084	GPX3	1	1	0	0	0	1	0	0	1	1	1	1	7
hsa-miR-423-5p	MIMAT0004748	GRIN1	2902	NM_007327	GRIN1	1	1	1	0	0	1	0	0	0	1	1	1	7
hsa-miR-423-5p	MIMAT0004748	GSS	2937	XM_005260406	GSS	1	1	1	0	0	1	0	0	0	1	1	1	7
hsa-miR-423-5p	MIMAT0004748	GTF2E1	2960	XM_005247401	GTF2E1	1	1	1	0	0	1	0	0	0	1	1	1	7
hsa-miR-423-5p	MIMAT0004748	HOXB5	3215	NM_002147	HOXB5	0	1	1	0	0	1	0	0	1	1	1	1	7
hsa-miR-423-5p	MIMAT0004748	HOXC6	3223	NM_153693	HOXC6	1	1	1	0	0	1	0	0	0	1	1	1	7
hsa-miR-423-5p	MIMAT0004748	HSD11B2	3291	NM_000196	HSD11B2	1	1	0	0	0	1	0	0	1	1	1	1	7
hsa-miR-423-5p	MIMAT0004748	IL10RA	3587	NM_001558	IL10RA	1	1	0	0	0	1	0	0	1	1	1	1	7
hsa-miR-423-5p	MIMAT0004748	ITGA2	3673	NM_002203	ITGA2	1	1	0	0	0	1	0	0	1	1	1	1	7
hsa-miR-423-5p	MIMAT0004748	JAG2	3714	NM_002226	JAG2	1	1	1	0	0	1	0	0	0	1	1	1	7
hsa-miR-423-5p	MIMAT0004748	JUP	3728	XM_005257315	JUP	1	1	1	0	0	1	0	0	0	1	1	1	7
hsa-miR-423-5p	MIMAT0004748	JUP	3728	XM_005277016	JUP	1	1	1	0	0	1	0	0	0	1	1	1	7
hsa-miR-423-5p	MIMAT0004748	KCNA6	3742	XM_005253686	KCNA6	1	1	1	0	0	1	0	0	0	1	1	1	7
hsa-miR-423-5p	MIMAT0004748	KCNJ11	3767	XM_005252910	KCNJ11	1	1	0	1	0	1	0	0	0	1	1	1	7
hsa-miR-423-5p	MIMAT0004748	KCNJ12	3768	NM_021012	KCNJ12	1	1	1	0	0	1	0	0	1	0	1	1	7
hsa-miR-423-5p	MIMAT0004748	KCNK2	3776	NM_001017424	KCNK2	1	1	1	0	0	1	0	0	0	1	1	1	7
hsa-miR-423-5p	MIMAT0004748	KCNQ3	3786	NM_004519	KCNQ3	1	1	1	0	0	1	0	0	1	0	1	1	7
hsa-miR-423-5p	MIMAT0004748	KIFC3	3801	XM_005255945	KIFC3	1	1	1	1	0	1	0	0	0	0	1	1	7
hsa-miR-423-5p	MIMAT0004748	KIFC3	3801	XM_005277768	KIFC3	1	1	1	1	0	1	0	0	0	0	1	1	7
hsa-miR-423-5p	MIMAT0004748	LCP1	3936	NM_002298	LCP1	0	1	1	0	0	1	0	0	1	1	1	1	7
hsa-miR-423-5p	MIMAT0004748	LIMK2	3985	NM_016733	LIMK2	0	1	1	0	0	1	0	1	0	1	1	1	7
hsa-miR-423-5p	MIMAT0004748	LRP4	4038	NM_002334	LRP4	1	1	0	0	0	1	0	0	1	1	1	1	7
hsa-miR-423-5p	MIMAT0004748	MAF	4094	NM_001031804	MAF	1	1	0	0	0	1	0	0	1	1	1	1	7
hsa-miR-423-5p	MIMAT0004748	MAFG	4097	NM_032711	MAFG	1	1	1	0	0	1	0	0	0	1	1	1	7
hsa-miR-423-5p	MIMAT0004748	MAG	4099	NM_080600	MAG	1	1	1	0	0	1	0	0	0	1	1	1	7
hsa-miR-423-5p	MIMAT0004748	MAP1B	4131	NM_005909	MAP1B	0	1	1	0	0	1	0	0	1	1	1	1	7
hsa-miR-423-5p	MIMAT0004748	MAZ	4150	NM_001042539	MAZ	0	1	1	0	0	1	0	0	1	1	1	1	7
hsa-miR-423-5p	MIMAT0004748	ADAM11	4185	XM_005257373	ADAM11	1	1	1	0	0	1	0	0	0	1	1	1	7
hsa-miR-423-5p	MIMAT0004748	MEF2A	4205	NM_001171894	MEF2A	1	1	0	0	0	1	0	1	0	1	1	1	7
hsa-miR-423-5p	MIMAT0004748	MAP3K3	4215	XM_005257376	MAP3K3	1	1	1	0	0	1	0	0	0	1	1	1	7
hsa-miR-423-5p	MIMAT0004748	MGAT3	4248	NM_002409	MGAT3	1	1	1	0	0	1	0	0	0	1	1	1	7
hsa-miR-423-5p	MIMAT0004748	MGAT5	4249	XM_005263666	MGAT5	1	1	1	0	0	1	0	0	0	1	1	1	7
hsa-miR-423-5p	MIMAT0004748	FOXO4	4303	NM_005938	FOXO4	1	1	0	0	0	1	0	0	1	1	1	1	7
hsa-miR-423-5p	MIMAT0004748	MMP14	4323	NM_004995	MMP14	1	1	1	0	0	1	0	0	1	0	1	1	7
hsa-miR-423-5p	MIMAT0004748	MOCS1	4337	NM_005943	MOCS1	1	1	0	0	0	1	0	1	0	1	1	1	7
hsa-miR-423-5p	MIMAT0004748	MPZ	4359	NM_000530	MPZ	1	1	0	0	0	1	0	0	1	1	1	1	7
hsa-miR-423-5p	MIMAT0004748	MYCL	4610	NM_001033081	MYCL	1	1	1	0	0	1	0	0	0	1	1	1	7
hsa-miR-423-5p	MIMAT0004748	MYH10	4628	XM_005256651	MYH10	1	1	1	0	0	1	0	0	0	1	1	1	7
hsa-miR-423-5p	MIMAT0004748	NDUFB4	4710	NM_001168331	NDUFB4	1	1	1	0	0	1	0	0	0	1	1	1	7
hsa-miR-423-5p	MIMAT0004748	NF2	4771	NM_181832	NF2	1	1	1	0	0	1	0	0	0	1	1	1	7
hsa-miR-423-5p	MIMAT0004748	NFATC2	4773	NM_012340	NFATC2	1	1	1	0	0	1	0	0	0	1	1	1	7
hsa-miR-423-5p	MIMAT0004748	NFATC3	4775	XM_005255973	NFATC3	1	1	1	0	0	1	0	0	0	1	1	1	7
hsa-miR-423-5p	MIMAT0004748	NFE2L1	4779	NM_003204	NFE2L1	1	1	0	0	0	1	0	0	1	1	1	1	7
hsa-miR-423-5p	MIMAT0004748	NFIB	4781	XM_005251467	NFIB	1	1	1	0	0	1	0	0	0	1	1	1	7
hsa-miR-423-5p	MIMAT0004748	NFIC	4782	NM_205843	NFIC	1	1	1	0	1	1	0	0	0	0	1	1	7
hsa-miR-423-5p	MIMAT0004748	NNAT	4826	NM_005386	NNAT	1	1	1	0	0	1	0	0	0	1	1	1	7
hsa-miR-423-5p	MIMAT0004748	NOS1	4842	NM_001204218	NOS1	1	1	1	0	0	1	0	0	0	1	1	1	7
hsa-miR-423-5p	MIMAT0004748	CNOT3	4849	XM_005258956	CNOT3	1	1	1	0	0	1	0	0	0	1	1	1	7
hsa-miR-423-5p	MIMAT0004748	CNOT3	4849	XM_005277076	CNOT3	1	1	1	0	0	1	0	0	0	1	1	1	7
hsa-miR-423-5p	MIMAT0004748	CNOT3	4849	XM_005277117	CNOT3	1	1	1	0	0	1	0	0	0	1	1	1	7
hsa-miR-423-5p	MIMAT0004748	CNOT3	4849	XM_005277142	CNOT3	1	1	1	0	0	1	0	0	0	1	1	1	7
hsa-miR-423-5p	MIMAT0004748	CNOT3	4849	XM_005277164	CNOT3	1	1	1	0	0	1	0	0	0	1	1	1	7
hsa-miR-423-5p	MIMAT0004748	CNOT3	4849	XM_005277187	CNOT3	1	1	1	0	0	1	0	0	0	1	1	1	7
hsa-miR-423-5p	MIMAT0004748	CNOT3	4849	XM_005277210	CNOT3	1	1	1	0	0	1	0	0	0	1	1	1	7
hsa-miR-423-5p	MIMAT0004748	CNOT3	4849	XM_005277266	CNOT3	1	1	1	0	0	1	0	0	0	1	1	1	7
hsa-miR-423-5p	MIMAT0004748	CNOT3	4849	XM_005277311	CNOT3	1	1	1	0	0	1	0	0	0	1	1	1	7
hsa-miR-423-5p	MIMAT0004748	CNOT3	4849	XM_005278279	CNOT3	1	1	1	0	0	1	0	0	0	1	1	1	7
hsa-miR-423-5p	MIMAT0004748	NOTCH3	4854	NM_000435	NOTCH3	1	1	0	0	0	1	0	0	1	1	1	1	7
hsa-miR-423-5p	MIMAT0004748	OGDH	4967	XM_005249761	OGDH	1	1	1	0	0	1	0	0	0	1	1	1	7
hsa-miR-423-5p	MIMAT0004748	OLR1	4973	NM_002543	OLR1	1	1	0	0	0	1	0	0	1	1	1	1	7
hsa-miR-423-5p	MIMAT0004748	OPHN1	4983	NM_002547	OPHN1	1	1	0	0	0	1	0	0	1	1	1	1	7
hsa-miR-423-5p	MIMAT0004748	OPRD1	4985	NM_000911	OPRD1	1	1	1	0	0	1	0	0	1	0	1	1	7
hsa-miR-423-5p	MIMAT0004748	PALM	5064	XM_005259566	PALM	1	1	1	0	0	1	0	0	0	1	1	1	7
hsa-miR-423-5p	MIMAT0004748	PCSK2	5126	NM_002594	PCSK2	1	1	0	0	0	1	0	0	1	1	1	1	7
hsa-miR-423-5p	MIMAT0004748	PFDN1	5201	NM_002622	PFDN1	1	1	1	0	0	1	0	0	1	0	1	1	7
hsa-miR-423-5p	MIMAT0004748	PFKFB3	5209	XM_005252463	PFKFB3	1	1	1	0	0	1	0	0	0	1	1	1	7
hsa-miR-423-5p	MIMAT0004748	PGF	5228	NM_002632	PGF	1	1	0	0	0	1	0	0	1	1	1	1	7
hsa-miR-423-5p	MIMAT0004748	PIM1	5292	NM_001243186	PIM1	1	1	1	0	0	1	0	0	0	1	1	1	7
hsa-miR-423-5p	MIMAT0004748	PLAGL2	5326	XM_005260436	PLAGL2	1	1	1	0	0	1	0	0	0	1	1	1	7
hsa-miR-423-5p	MIMAT0004748	POU2F2	5452	XM_005259009	POU2F2	1	1	1	0	0	1	0	0	0	1	1	1	7
hsa-miR-423-5p	MIMAT0004748	PPARD	5467	XM_005249192	PPARD	1	1	1	0	0	1	0	0	0	1	1	1	7
hsa-miR-423-5p	MIMAT0004748	CTSA	5476	NM_001127695	CTSA	1	1	1	0	0	1	0	0	0	1	1	1	7
hsa-miR-423-5p	MIMAT0004748	PPP1R10	5514	NM_002714	PPP1R10	1	1	0	0	0	1	0	1	0	1	1	1	7
hsa-miR-423-5p	MIMAT0004748	PPP2R4	5524	NM_178001	PPP2R4	1	1	1	0	0	1	0	0	0	1	1	1	7
hsa-miR-423-5p	MIMAT0004748	PRKACA	5566	XM_005259984	PRKACA	1	1	1	0	0	1	0	0	0	1	1	1	7
hsa-miR-423-5p	MIMAT0004748	MAPK3	5595	NM_002746	MAPK3	1	1	1	0	0	1	0	0	0	1	1	1	7
hsa-miR-423-5p	MIMAT0004748	MAPK4	5596	XM_005258299	MAPK4	1	1	1	0	0	1	0	0	0	1	1	1	7
hsa-miR-423-5p	MIMAT0004748	PRLR	5618	NM_000949	PRLR	1	1	1	0	0	1	0	0	0	1	1	1	7
hsa-miR-423-5p	MIMAT0004748	PSMD11	5717	NM_001270482	PSMD11	1	1	1	0	0	1	0	0	0	1	1	1	7
hsa-miR-423-5p	MIMAT0004748	QSOX1	5768	XM_005245375	QSOX1	1	1	1	0	0	1	0	0	0	1	1	1	7
hsa-miR-423-5p	MIMAT0004748	PVALB	5816	NM_002854	PVALB	1	1	1	0	0	1	0	0	1	0	1	1	7
hsa-miR-423-5p	MIMAT0004748	PXN	5829	XM_005253910	PXN	1	1	1	0	0	1	0	0	0	1	1	1	7
hsa-miR-423-5p	MIMAT0004748	PYCR1	5831	NM_006907	PYCR1	1	1	1	0	0	1	0	0	0	1	1	1	7
hsa-miR-423-5p	MIMAT0004748	RAB3B	5865	NM_002867	RAB3B	1	1	0	0	0	1	0	0	1	1	1	1	7
hsa-miR-423-5p	MIMAT0004748	RAB5B	5869	NM_002868	RAB5B	1	1	0	0	0	1	0	1	1	0	1	1	7
hsa-miR-423-5p	MIMAT0004748	RALB	5899	XM_005263728	RALB	1	1	1	0	0	1	0	0	0	1	1	1	7
hsa-miR-423-5p	MIMAT0004748	RALGDS	5900	NM_006266	RALGDS	1	1	1	0	0	1	0	0	0	1	1	1	7
hsa-miR-423-5p	MIMAT0004748	RNF2	6045	NM_007212	RNF2	1	1	0	0	0	1	0	0	1	1	1	1	7
hsa-miR-423-5p	MIMAT0004748	RRBP1	6238	XM_005260784	RRBP1	1	1	1	1	0	1	0	0	0	0	1	1	7
hsa-miR-423-5p	MIMAT0004748	SCN1B	6324	NM_001037	SCN1B	1	1	1	0	0	1	0	0	1	0	1	1	7
hsa-miR-423-5p	MIMAT0004748	SCN4A	6329	XM_005257566	SCN4A	1	1	1	0	0	1	0	0	0	1	1	1	7
hsa-miR-423-5p	MIMAT0004748	SCN5A	6331	NM_001099404	SCN5A	1	1	1	0	0	1	0	0	0	1	1	1	7
hsa-miR-423-5p	MIMAT0004748	SCN5A	6331	NM_198056	SCN5A	1	1	1	0	0	1	0	0	0	1	1	1	7
hsa-miR-423-5p	MIMAT0004748	SCN7A	6332	NM_002976	SCN7A	1	1	1	0	0	1	0	0	0	1	1	1	7
hsa-miR-423-5p	MIMAT0004748	SH3BP2	6452	NM_001145855	SH3BP2	1	1	1	0	0	1	0	0	0	1	1	1	7
hsa-miR-423-5p	MIMAT0004748	SHC1	6464	NM_001130040	SHC1	1	1	1	0	0	1	0	0	0	1	1	1	7
hsa-miR-423-5p	MIMAT0004748	SLC1A3	6507	NM_004172	SLC1A3	1	1	0	0	0	1	0	0	1	1	1	1	7
hsa-miR-423-5p	MIMAT0004748	SLC2A3	6515	NM_006931	SLC2A3	1	1	0	0	0	1	0	0	1	1	1	1	7
hsa-miR-423-5p	MIMAT0004748	SLC6A8	6535	NM_005629	SLC6A8	1	1	0	0	0	1	0	0	1	1	1	1	7
hsa-miR-423-5p	MIMAT0004748	SLIT1	6585	NM_003061	SLIT1	1	1	1	0	0	1	0	0	0	1	1	1	7
hsa-miR-423-5p	MIMAT0004748	SMARCA4	6597	XM_005260026	SMARCA4	0	1	1	1	0	1	0	0	0	1	1	1	7
hsa-miR-423-5p	MIMAT0004748	SMARCC2	6601	NM_003075	SMARCC2	1	1	1	0	0	1	0	1	0	0	1	1	7
hsa-miR-423-5p	MIMAT0004748	SMARCD1	6602	XM_005269107	SMARCD1	1	1	0	1	0	1	0	0	0	1	1	1	7
hsa-miR-423-5p	MIMAT0004748	SNTA1	6640	NM_003098	SNTA1	1	1	0	0	0	1	0	0	1	1	1	1	7
hsa-miR-423-5p	MIMAT0004748	CAPN15	6650	XM_005255516	CAPN15	1	1	1	0	0	1	0	0	0	1	1	1	7
hsa-miR-423-5p	MIMAT0004748	STIM1	6786	NM_001277961	STIM1	1	1	0	1	0	1	0	0	0	1	1	1	7
hsa-miR-423-5p	MIMAT0004748	SUPT6H	6830	XM_005258026	SUPT6H	1	1	1	0	0	1	0	0	0	1	1	1	7
hsa-miR-423-5p	MIMAT0004748	SUV39H1	6839	NM_003173	SUV39H1	1	1	0	0	0	1	0	0	1	1	1	1	7
hsa-miR-423-5p	MIMAT0004748	VAMP2	6844	XM_005256775	VAMP2	1	1	1	0	0	1	0	0	0	1	1	1	7
hsa-miR-423-5p	MIMAT0004748	SYN1	6853	NM_006950	SYN1	1	1	1	0	0	1	0	0	0	1	1	1	7
hsa-miR-423-5p	MIMAT0004748	TACC1	6867	XM_005273622	TACC1	1	1	1	0	0	1	0	0	0	1	1	1	7
hsa-miR-423-5p	MIMAT0004748	TACC1	6867	XM_005273623	TACC1	1	1	1	0	0	1	0	0	0	1	1	1	7
hsa-miR-423-5p	MIMAT0004748	HNF1B	6928	NM_000458	HNF1B	1	1	0	0	0	1	0	0	1	1	1	1	7
hsa-miR-423-5p	MIMAT0004748	TFDP2	7029	NM_001178138	TFDP2	1	1	1	0	0	1	0	0	0	1	1	1	7
hsa-miR-423-5p	MIMAT0004748	THRB	7068	NM_001252634	THRB	1	1	1	0	0	1	0	0	0	1	1	1	7
hsa-miR-423-5p	MIMAT0004748	TLN1	7094	NM_006289	TLN1	1	1	1	0	0	1	0	0	1	0	1	1	7
hsa-miR-423-5p	MIMAT0004748	TSPAN7	7102	XM_005272646	TSPAN7	1	1	1	0	0	1	0	0	0	1	1	1	7
hsa-miR-423-5p	MIMAT0004748	TNFAIP2	7127	XM_005268036	TNFAIP2	1	1	1	0	0	1	0	0	0	1	1	1	7
hsa-miR-423-5p	MIMAT0004748	TRPS1	7227	NM_014112	TRPS1	1	1	0	0	0	1	0	0	1	1	1	1	7
hsa-miR-423-5p	MIMAT0004748	TUB	7275	NM_003320	TUB	1	1	1	0	0	1	0	0	0	1	1	1	7
hsa-miR-423-5p	MIMAT0004748	TUBG1	7283	NM_001070	TUBG1	1	1	0	0	0	1	0	0	1	1	1	1	7
hsa-miR-423-5p	MIMAT0004748	VAV2	7410	XM_005272213	VAV2	1	1	1	0	0	1	0	0	0	1	1	1	7
hsa-miR-423-5p	MIMAT0004748	VIPR1	7433	NM_001251882	VIPR1	1	1	1	0	0	1	0	0	0	1	1	1	7
hsa-miR-423-5p	MIMAT0004748	CLIP2	7461	NM_003388	CLIP2	1	1	1	0	0	1	0	0	0	1	1	1	7
hsa-miR-423-5p	MIMAT0004748	WNT5A	7474	NM_003392	WNT5A	1	1	0	0	0	1	0	0	1	1	1	1	7
hsa-miR-423-5p	MIMAT0004748	YWHAE	7531	NM_006761	YWHAE	1	1	0	0	0	1	0	0	1	1	1	1	7
hsa-miR-423-5p	MIMAT0004748	ZNF177	7730	NM_001172651	ZNF177	1	1	1	0	0	1	0	0	0	1	1	1	7
hsa-miR-423-5p	MIMAT0004748	SLC30A2	7780	XM_005245990	SLC30A2	1	1	1	0	0	1	0	0	0	1	1	1	7
hsa-miR-423-5p	MIMAT0004748	PAX8	7849	XM_005263758	PAX8	1	1	1	0	0	1	0	0	0	1	1	1	7
hsa-miR-423-5p	MIMAT0004748	KAT6A	7994	NM_001099412	KAT6A	1	1	0	0	0	1	0	1	0	1	1	1	7
hsa-miR-423-5p	MIMAT0004748	CCDC6	8030	NM_005436	CCDC6	1	1	0	0	0	1	0	0	1	1	1	1	7
hsa-miR-423-5p	MIMAT0004748	MLF2	8079	NM_005439	MLF2	1	1	0	0	0	1	0	0	1	1	1	1	7
hsa-miR-423-5p	MIMAT0004748	PABPN1	8106	NM_004643	PABPN1	1	1	1	0	0	0	0	1	1	0	1	1	7
hsa-miR-423-5p	MIMAT0004748	RND2	8153	NM_005440	RND2	1	1	0	0	0	1	0	0	1	1	1	1	7
hsa-miR-423-5p	MIMAT0004748	DPF1	8193	XM_005259288	DPF1	1	1	1	0	0	1	0	0	0	1	1	1	7
hsa-miR-423-5p	MIMAT0004748	UBL4A	8266	NM_014235	UBL4A	0	1	1	0	0	1	0	0	1	1	1	1	7
hsa-miR-423-5p	MIMAT0004748	ARID1A	8289	NM_006015	ARID1A	1	1	1	0	0	1	0	0	0	1	1	1	7
hsa-miR-423-5p	MIMAT0004748	PIP4K2B	8396	NM_003559	PIP4K2B	1	1	0	0	0	1	0	0	1	1	1	1	7
hsa-miR-423-5p	MIMAT0004748	PLA2G6	8398	XM_005261766	PLA2G6	1	1	1	0	0	1	0	0	0	1	1	1	7
hsa-miR-423-5p	MIMAT0004748	SPOP	8405	NM_001007226	SPOP	1	1	1	0	0	1	0	0	0	1	1	1	7
hsa-miR-423-5p	MIMAT0004748	STK24	8428	NM_001032296	STK24	1	1	1	0	0	1	0	0	0	1	1	1	7
hsa-miR-423-5p	MIMAT0004748	NDST2	8509	NM_003635	NDST2	0	1	1	0	0	1	0	0	1	1	1	1	7
hsa-miR-423-5p	MIMAT0004748	DGKD	8527	NM_152879	DGKD	1	1	1	0	0	1	0	0	0	1	1	1	7
hsa-miR-423-5p	MIMAT0004748	MADD	8567	XM_005253198	MADD	1	1	1	0	0	1	0	0	0	1	1	1	7
hsa-miR-423-5p	MIMAT0004748	PEA15	8682	XM_005245562	PEA15	1	1	1	0	0	1	0	0	0	1	1	1	7
hsa-miR-423-5p	MIMAT0004748	ALDH1A2	8854	NM_001206897	ALDH1A2	1	1	1	0	0	1	0	0	0	1	1	1	7
hsa-miR-423-5p	MIMAT0004748	LDB1	8861	XM_005270262	LDB1	1	1	1	0	0	1	0	0	0	1	1	1	7
hsa-miR-423-5p	MIMAT0004748	FAM127A	8933	NM_001078171	FAM127A	0	1	1	0	0	1	0	0	1	1	1	1	7
hsa-miR-423-5p	MIMAT0004748	TAF1C	9013	NM_005679	TAF1C	1	1	1	0	0	1	0	0	0	1	1	1	7
hsa-miR-423-5p	MIMAT0004748	RNF8	9025	NM_003958	RNF8	0	1	1	1	0	1	0	0	0	1	1	1	7
hsa-miR-423-5p	MIMAT0004748	DNAJA3	9093	NM_005147	DNAJA3	0	1	1	0	0	1	0	0	1	1	1	1	7
hsa-miR-423-5p	MIMAT0004748	ARHGEF2	9181	XM_005245594	ARHGEF2	1	1	1	0	0	1	0	0	0	1	1	1	7
hsa-miR-423-5p	MIMAT0004748	ZMYM4	9202	XM_005271328	ZMYM4	1	1	1	0	0	1	0	0	0	1	1	1	7
hsa-miR-423-5p	MIMAT0004748	DLGAP2	9228	XM_005266038	DLGAP2	1	1	1	0	0	1	0	0	0	1	1	1	7
hsa-miR-423-5p	MIMAT0004748	CYTH2	9266	NM_017457	CYTH2	1	1	1	0	0	1	0	0	0	1	1	1	7
hsa-miR-423-5p	MIMAT0004748	NRXN2	9379	NM_015080	NRXN2	1	1	1	0	0	1	0	0	0	1	1	1	7
hsa-miR-423-5p	MIMAT0004748	ECEL1	9427	NM_004826	ECEL1	1	1	1	0	0	1	0	0	1	0	1	1	7
hsa-miR-423-5p	MIMAT0004748	ARHGEF6	9459	XM_005262500	ARHGEF6	1	1	1	0	0	1	0	0	0	1	1	1	7
hsa-miR-423-5p	MIMAT0004748	RASAL2	9462	NM_170692	RASAL2	1	1	1	0	0	1	0	0	0	1	1	1	7
hsa-miR-423-5p	MIMAT0004748	ONECUT2	9480	NM_004852	ONECUT2	1	1	0	0	0	1	0	0	1	1	1	1	7
hsa-miR-423-5p	MIMAT0004748	H6PD	9563	XM_005263539	H6PD	1	1	1	0	0	1	0	0	0	1	1	1	7
hsa-miR-423-5p	MIMAT0004748	GTPBP1	9567	NM_004286	GTPBP1	0	1	1	0	0	1	0	0	1	1	1	1	7
hsa-miR-423-5p	MIMAT0004748	IER2	9592	NM_004907	IER2	0	1	1	0	0	1	0	0	1	1	1	1	7
hsa-miR-423-5p	MIMAT0004748	KLK4	9622	NM_004917	KLK4	0	1	1	0	0	1	0	0	1	1	1	1	7
hsa-miR-423-5p	MIMAT0004748	TRAM2	9697	NM_012288	TRAM2	1	1	0	0	0	1	0	0	1	1	1	1	7
hsa-miR-423-5p	MIMAT0004748	SNPH	9751	XM_005260888	SNPH	1	1	1	0	0	1	0	0	0	1	1	1	7
hsa-miR-423-5p	MIMAT0004748	HDAC4	9759	NM_006037	HDAC4	0	1	1	0	0	1	0	0	1	1	1	1	7
hsa-miR-423-5p	MIMAT0004748	ATG13	9776	NM_001205119	ATG13	1	1	1	0	0	1	0	1	0	0	1	1	7
hsa-miR-423-5p	MIMAT0004748	PHYHIP	9796	NM_001099335	PHYHIP	1	1	1	0	0	1	0	0	0	1	1	1	7
hsa-miR-423-5p	MIMAT0004748	CTIF	9811	NM_001142397	CTIF	1	1	1	0	0	1	0	0	0	1	1	1	7
hsa-miR-423-5p	MIMAT0004748	ARHGEF17	9828	NM_014786	ARHGEF17	1	1	1	0	0	1	0	0	1	0	1	1	7
hsa-miR-423-5p	MIMAT0004748	TRIM14	9830	NM_014788	TRIM14	1	1	1	0	0	1	0	0	0	1	1	1	7
hsa-miR-423-5p	MIMAT0004748	TRANK1	9881	NM_014831	TRANK1	1	1	0	0	0	1	0	0	1	1	1	1	7
hsa-miR-423-5p	MIMAT0004748	SV2A	9900	NM_014849	SV2A	1	1	0	0	0	1	0	0	1	1	1	1	7
hsa-miR-423-5p	MIMAT0004748	G3BP2	9908	XM_005263384	G3BP2	1	1	1	0	0	1	0	0	0	1	1	1	7
hsa-miR-423-5p	MIMAT0004748	ARHGAP44	9912	NM_014859	ARHGAP44	0	1	1	0	0	1	0	0	1	1	1	1	7
hsa-miR-423-5p	MIMAT0004748	HDAC5	10014	XM_005256904	HDAC5	1	1	1	0	0	1	0	0	0	1	1	1	7
hsa-miR-423-5p	MIMAT0004748	TOM1	10043	NM_001135732	TOM1	1	1	1	0	0	1	0	0	0	1	1	1	7
hsa-miR-423-5p	MIMAT0004748	ABCC5	10057	XM_005247059	ABCC5	1	1	1	0	0	1	0	0	0	1	1	1	7
hsa-miR-423-5p	MIMAT0004748	ARPC4	10093	NM_005718	ARPC4	1	1	0	0	0	1	0	1	0	1	1	1	7
hsa-miR-423-5p	MIMAT0004748	TSPAN5	10098	NM_005723	TSPAN5	1	1	1	0	0	1	0	0	0	1	1	1	7
hsa-miR-423-5p	MIMAT0004748	PREB	10113	NM_013388	PREB	1	1	0	0	0	1	0	0	1	1	1	1	7
hsa-miR-423-5p	MIMAT0004748	GDF11	10220	NM_005811	GDF11	1	1	1	0	0	1	0	0	0	1	1	1	7
hsa-miR-423-5p	MIMAT0004748	AP3S2	10239	NM_005829	AP3S2	0	1	1	0	0	1	0	0	1	1	1	1	7
hsa-miR-423-5p	MIMAT0004748	CACNG3	10368	NM_006539	CACNG3	1	1	0	0	0	1	0	0	1	1	1	1	7
hsa-miR-423-5p	MIMAT0004748	APPBP2	10513	NM_006380	APPBP2	1	1	0	0	0	1	0	0	1	1	1	1	7
hsa-miR-423-5p	MIMAT0004748	HYOU1	10525	NM_006389	HYOU1	1	1	0	0	0	1	0	0	1	1	1	1	7
hsa-miR-423-5p	MIMAT0004748	NEBL	10529	NM_006393	NEBL	0	1	1	0	0	1	0	0	1	1	1	1	7
hsa-miR-423-5p	MIMAT0004748	DCTN2	10540	NM_006400	DCTN2	1	1	0	1	0	1	0	0	1	0	1	1	7
hsa-miR-423-5p	MIMAT0004748	HEXIM1	10614	NM_006460	HEXIM1	1	1	0	0	0	1	0	0	1	1	1	1	7
hsa-miR-423-5p	MIMAT0004748	CELF1	10658	XM_005252758	CELF1	1	1	1	0	0	1	0	0	0	1	1	1	7
hsa-miR-423-5p	MIMAT0004748	KLF1	10661	NM_006563	KLF1	0	1	1	0	0	1	0	0	1	1	1	1	7
hsa-miR-423-5p	MIMAT0004748	CHL1	10752	NM_006614	CHL1	1	1	1	0	0	1	0	0	1	0	1	1	7
hsa-miR-423-5p	MIMAT0004748	IQGAP2	10788	NM_006633	IQGAP2	1	1	0	0	0	1	0	0	1	1	1	1	7
hsa-miR-423-5p	MIMAT0004748	CPLX2	10814	XM_005265800	CPLX2	1	1	1	0	0	1	0	0	0	1	1	1	7
hsa-miR-423-5p	MIMAT0004748	RAB10	10890	NM_016131	RAB10	1	1	0	0	0	1	0	0	1	1	1	1	7
hsa-miR-423-5p	MIMAT0004748	MMP24	10893	NM_006690	MMP24	1	1	0	0	0	1	0	0	1	1	1	1	7
hsa-miR-423-5p	MIMAT0004748	HNRNPA0	10949	NM_006805	HNRNPA0	1	1	0	0	0	1	0	0	1	1	1	1	7
hsa-miR-423-5p	MIMAT0004748	RAB35	11021	NM_006861	RAB35	0	1	1	0	0	1	0	0	1	1	1	1	7
hsa-miR-423-5p	MIMAT0004748	ABHD2	11057	NM_007011	ABHD2	1	1	1	0	0	1	0	0	0	1	1	1	7
hsa-miR-423-5p	MIMAT0004748	CYB561D2	11068	NM_007022	CYB561D2	0	1	1	0	0	1	0	0	1	1	1	1	7
hsa-miR-423-5p	MIMAT0004748	TRIOBP	11078	NM_001039141	TRIOBP	1	1	1	0	0	1	0	0	0	1	1	1	7
hsa-miR-423-5p	MIMAT0004748	HNRNPUL1	11100	NM_007040	HNRNPUL1	1	1	1	0	0	1	0	0	0	1	1	1	7
hsa-miR-423-5p	MIMAT0004748	AKAP13	11214	XM_005254839	AKAP13	1	1	1	0	0	1	0	0	0	1	1	1	7
hsa-miR-423-5p	MIMAT0004748	MAN1B1	11253	NM_016219	MAN1B1	0	1	1	0	0	1	0	0	1	1	1	1	7
hsa-miR-423-5p	MIMAT0004748	EXOC3	11336	NM_007277	EXOC3	1	1	1	0	0	1	0	0	1	0	1	1	7
hsa-miR-423-5p	MIMAT0004748	MGLL	11343	NM_007283	MGLL	1	1	1	0	0	1	0	0	0	1	1	1	7
hsa-miR-423-5p	MIMAT0004748	SYNPO	11346	XM_005268368	SYNPO	1	1	1	0	0	1	0	0	0	1	1	1	7
hsa-miR-423-5p	MIMAT0004748	VASH1	22846	NM_014909	VASH1	1	1	0	0	0	1	0	0	1	1	1	1	7
hsa-miR-423-5p	MIMAT0004748	ZNF365	22891	NM_014951	ZNF365	1	1	0	0	0	1	0	0	1	1	1	1	7
hsa-miR-423-5p	MIMAT0004748	RPH3A	22895	NM_001143854	RPH3A	1	1	1	0	0	1	0	0	0	1	1	1	7
hsa-miR-423-5p	MIMAT0004748	MAPKBP1	23005	NM_001128608	MAPKBP1	1	1	1	0	0	1	0	0	0	1	1	1	7
hsa-miR-423-5p	MIMAT0004748	UNC13A	23025	XM_005259821	UNC13A	1	1	1	0	0	1	0	0	0	1	1	1	7
hsa-miR-423-5p	MIMAT0004748	WDTC1	23038	NM_001276252	WDTC1	1	1	1	0	0	1	0	0	0	1	1	1	7
hsa-miR-423-5p	MIMAT0004748	KIF21B	23046	NM_001252100	KIF21B	1	1	1	0	0	1	0	0	0	1	1	1	7
hsa-miR-423-5p	MIMAT0004748	ZHX3	23051	XM_005260343	ZHX3	1	1	1	0	0	1	0	0	0	1	1	1	7
hsa-miR-423-5p	MIMAT0004748	SIPA1L3	23094	XM_005258672	SIPA1L3	1	1	1	0	0	1	0	0	0	1	1	1	7
hsa-miR-423-5p	MIMAT0004748	FSTL4	23105	NM_015082	FSTL4	0	1	1	0	0	1	0	0	1	1	1	1	7
hsa-miR-423-5p	MIMAT0004748	TNRC6B	23112	XM_005261393	TNRC6B	1	1	1	0	0	1	0	0	0	1	1	1	7
hsa-miR-423-5p	MIMAT0004748	NFASC	23114	XM_005244973	NFASC	1	1	1	0	0	1	0	0	0	1	1	1	7
hsa-miR-423-5p	MIMAT0004748	TAB2	23118	NM_015093	TAB2	1	1	0	0	0	1	0	0	1	1	1	1	7
hsa-miR-423-5p	MIMAT0004748	HIC2	23119	XM_005261395	HIC2	1	1	1	0	0	1	0	0	0	1	1	1	7
hsa-miR-423-5p	MIMAT0004748	PLXND1	23129	NM_015103	PLXND1	1	1	1	0	0	1	0	0	1	0	1	1	7
hsa-miR-423-5p	MIMAT0004748	PHF8	23133	NM_015107	PHF8	1	1	0	0	0	1	0	0	1	1	1	1	7
hsa-miR-423-5p	MIMAT0004748	GGA3	23163	NM_001172703	GGA3	1	1	1	0	0	1	0	0	0	1	1	1	7
hsa-miR-423-5p	MIMAT0004748	TTLL12	23170	NM_015140	TTLL12	1	1	0	0	0	1	0	0	1	1	1	1	7
hsa-miR-423-5p	MIMAT0004748	FAM168A	23201	XM_005273852	FAM168A	1	1	1	0	0	1	0	0	0	1	1	1	7
hsa-miR-423-5p	MIMAT0004748	NUP210	23225	NM_024923	NUP210	0	1	1	0	0	1	0	0	1	1	1	1	7
hsa-miR-423-5p	MIMAT0004748	MGA	23269	XM_005254243	MGA	1	1	1	0	0	1	0	0	0	1	1	1	7
hsa-miR-423-5p	MIMAT0004748	WWC1	23286	NM_001161661	WWC1	1	1	1	0	0	1	0	0	0	1	1	1	7
hsa-miR-423-5p	MIMAT0004748	RPGRIP1L	23322	NM_015272	RPGRIP1L	1	1	0	0	0	1	0	0	1	1	1	1	7
hsa-miR-423-5p	MIMAT0004748	HAUS5	23354	NM_015302	HAUS5	1	1	0	0	0	1	0	0	1	1	1	1	7
hsa-miR-423-5p	MIMAT0004748	SMG5	23381	NM_015327	SMG5	1	1	0	0	0	1	0	0	1	1	1	1	7
hsa-miR-423-5p	MIMAT0004748	SLC7A8	23428	NM_012244	SLC7A8	1	1	1	0	0	1	0	0	0	1	1	1	7
hsa-miR-423-5p	MIMAT0004748	C3orf27	23434	NM_007354	C3orf27	1	1	0	0	0	1	0	0	1	1	1	1	7
hsa-miR-423-5p	MIMAT0004748	CBX6	23466	XM_005261412	CBX6	1	1	1	0	0	1	0	0	0	1	1	1	7
hsa-miR-423-5p	MIMAT0004748	CBX5	23468	NM_001127322	CBX5	1	1	0	0	0	1	0	1	0	1	1	1	7
hsa-miR-423-5p	MIMAT0004748	GLTSCR1L	23506	NM_015349	GLTSCR1L	1	1	0	0	0	1	0	0	1	1	1	1	7
hsa-miR-423-5p	MIMAT0004748	ATP6V0A2	23545	NM_012463	ATP6V0A2	1	1	0	0	0	1	0	0	1	1	1	1	7
hsa-miR-423-5p	MIMAT0004748	PSD4	23550	NM_012455	PSD4	1	1	0	0	0	1	0	0	1	1	1	1	7
hsa-miR-423-5p	MIMAT0004748	SMUG1	23583	NM_014311	SMUG1	0	1	1	0	0	1	0	0	1	1	1	1	7
hsa-miR-423-5p	MIMAT0004748	MKRN1	23608	NM_013446	MKRN1	1	1	0	0	0	1	0	0	1	1	1	1	7
hsa-miR-423-5p	MIMAT0004748	BACE1	23621	NM_012104	BACE1	1	1	1	0	0	1	0	0	0	1	1	1	7
hsa-miR-423-5p	MIMAT0004748	MAFF	23764	NM_001161572	MAFF	1	1	1	0	0	1	0	0	0	1	1	1	7
hsa-miR-423-5p	MIMAT0004748	DSTYK	25778	NM_015375	DSTYK	1	1	1	0	0	1	0	0	0	1	1	1	7
hsa-miR-423-5p	MIMAT0004748	ULK3	25989	NM_001099436	ULK3	1	1	0	0	0	1	0	0	1	1	1	1	7
hsa-miR-423-5p	MIMAT0004748	TENM4	26011	XM_005273900	TENM4	1	1	1	0	0	1	0	0	0	1	1	1	7
hsa-miR-423-5p	MIMAT0004748	FAM127B	26071	NM_001078172	FAM127B	0	1	1	0	0	1	0	0	1	1	1	1	7
hsa-miR-423-5p	MIMAT0004748	SZRD1	26099	NM_001114600	SZRD1	1	1	0	0	0	1	0	1	0	1	1	1	7
hsa-miR-423-5p	MIMAT0004748	TANC2	26115	XM_005257201	TANC2	1	1	1	0	0	1	0	0	0	1	1	1	7
hsa-miR-423-5p	MIMAT0004748	PHF19	26147	NM_015651	PHF19	1	1	0	0	0	1	0	0	1	1	1	1	7
hsa-miR-423-5p	MIMAT0004748	KLHL3	26249	NM_001257194	KLHL3	1	1	1	0	0	1	0	0	0	1	1	1	7
hsa-miR-423-5p	MIMAT0004748	PLA2G2D	26279	NM_012400	PLA2G2D	1	1	1	0	0	0	0	0	1	1	1	1	7
hsa-miR-423-5p	MIMAT0004748	LHX6	26468	NM_001242335	LHX6	1	1	1	0	0	1	0	0	0	1	1	1	7
hsa-miR-423-5p	MIMAT0004748	DIEXF	27042	NM_014388	DIEXF	1	1	1	0	0	1	0	0	1	0	1	1	7
hsa-miR-423-5p	MIMAT0004748	CYTH4	27128	NM_013385	CYTH4	1	1	0	0	0	1	0	0	1	1	1	1	7
hsa-miR-423-5p	MIMAT0004748	STRN4	29888	NM_001039877	STRN4	1	1	1	0	0	1	0	0	0	1	1	1	7
hsa-miR-423-5p	MIMAT0004748	GLTSCR1	29998	XM_005258833	GLTSCR1	1	1	1	0	0	1	0	0	0	1	1	1	7
hsa-miR-423-5p	MIMAT0004748	RAX	30062	NM_013435	RAX	0	1	1	0	0	1	0	0	1	1	1	1	7
hsa-miR-423-5p	MIMAT0004748	ST6GALNAC6	30815	XM_005251952	ST6GALNAC6	1	1	1	0	0	1	0	0	0	1	1	1	7
hsa-miR-423-5p	MIMAT0004748	KLK14	43847	NM_022046	KLK14	0	1	1	0	0	1	0	0	1	1	1	1	7
hsa-miR-423-5p	MIMAT0004748	ARHGEF4	50649	XM_005263681	ARHGEF4	1	1	1	0	0	1	0	0	0	1	1	1	7
hsa-miR-423-5p	MIMAT0004748	ZBTB7B	51043	NM_001252406	ZBTB7B	1	1	1	0	0	1	0	0	0	1	1	1	7
hsa-miR-423-5p	MIMAT0004748	ADIPOR1	51094	NM_015999	ADIPOR1	1	1	1	0	0	1	0	0	1	0	1	1	7
hsa-miR-423-5p	MIMAT0004748	ZDHHC9	51114	NM_001008222	ZDHHC9	1	1	0	0	0	1	0	1	0	1	1	1	7
hsa-miR-423-5p	MIMAT0004748	FAM53C	51307	NM_001135647	FAM53C	1	1	0	0	0	1	0	1	0	1	1	1	7
hsa-miR-423-5p	MIMAT0004748	PHF21A	51317	NM_001101802	PHF21A	1	1	1	0	0	1	0	0	0	1	1	1	7
hsa-miR-423-5p	MIMAT0004748	ZBTB7A	51341	XM_005259572	ZBTB7A	1	1	1	0	0	1	0	0	0	1	1	1	7
hsa-miR-423-5p	MIMAT0004748	SCARA3	51435	XM_005273527	SCARA3	1	1	1	0	0	1	0	0	0	1	1	1	7
hsa-miR-423-5p	MIMAT0004748	C9orf114	51490	NM_016390	C9orf114	1	1	0	0	0	1	0	0	1	1	1	1	7
hsa-miR-423-5p	MIMAT0004748	PPHLN1	51535	NM_016488	PPHLN1	1	1	0	0	0	1	0	0	1	1	1	1	7
hsa-miR-423-5p	MIMAT0004748	ZCCHC17	51538	NM_016505	ZCCHC17	1	1	0	0	0	1	0	0	1	1	1	1	7
hsa-miR-423-5p	MIMAT0004748	UBE2D4	51619	NM_015983	UBE2D4	1	1	1	0	0	1	0	0	1	0	1	1	7
hsa-miR-423-5p	MIMAT0004748	ADAM22	53616	XM_005250444	ADAM22	1	1	1	0	0	1	0	0	0	1	1	1	7
hsa-miR-423-5p	MIMAT0004748	C21orf58	54058	XM_005261150	C21orf58	0	1	1	1	0	1	0	0	0	1	1	1	7
hsa-miR-423-5p	MIMAT0004748	NEURL1B	54492	NM_001142651	NEURL1B	1	1	1	0	0	1	0	0	0	1	1	1	7
hsa-miR-423-5p	MIMAT0004748	CCDC93	54520	NM_019044	CCDC93	1	1	0	0	0	1	0	0	1	1	1	1	7
hsa-miR-423-5p	MIMAT0004748	DDIT4	54541	NM_019058	DDIT4	1	1	0	1	0	1	0	0	1	0	1	1	7
hsa-miR-423-5p	MIMAT0004748	SDK2	54549	NM_001144952	SDK2	1	1	1	0	0	1	0	0	0	1	1	1	7
hsa-miR-423-5p	MIMAT0004748	DLL4	54567	NM_019074	DLL4	1	1	1	0	0	1	0	0	1	0	1	1	7
hsa-miR-423-5p	MIMAT0004748	FBXL19	54620	NM_001099784	FBXL19	1	1	1	0	0	1	0	0	1	0	1	1	7
hsa-miR-423-5p	MIMAT0004748	CNNM2	54805	NM_017649	CNNM2	0	1	1	1	0	1	0	0	0	1	1	1	7
hsa-miR-423-5p	MIMAT0004748	BCAS3	54828	XM_005257473	BCAS3	1	1	1	0	0	1	0	0	0	1	1	1	7
hsa-miR-423-5p	MIMAT0004748	BSPRY	54836	NM_017688	BSPRY	0	1	1	0	0	1	0	0	1	1	1	1	7
hsa-miR-423-5p	MIMAT0004748	TMEM214	54867	XM_005264381	TMEM214	1	1	1	0	0	1	0	0	0	1	1	1	7
hsa-miR-423-5p	MIMAT0004748	TMEM260	54916	NM_017799	TMEM260	0	1	1	0	0	1	0	0	1	1	1	1	7
hsa-miR-423-5p	MIMAT0004748	C20orf27	54976	NM_001258430	C20orf27	1	1	1	0	0	1	0	0	0	1	1	1	7
hsa-miR-423-5p	MIMAT0004748	VPS37C	55048	XM_005274077	VPS37C	1	1	1	0	0	1	0	0	0	1	1	1	7
hsa-miR-423-5p	MIMAT0004748	SAMD4B	55095	XM_005259029	SAMD4B	1	1	1	0	0	1	0	0	0	1	1	1	7
hsa-miR-423-5p	MIMAT0004748	ARHGEF10L	55160	XM_005245921	ARHGEF10L	1	1	1	0	0	1	0	0	0	1	1	1	7
hsa-miR-423-5p	MIMAT0004748	PRMT6	55170	NM_018137	PRMT6	1	1	0	0	0	1	0	0	1	1	1	1	7
hsa-miR-423-5p	MIMAT0004748	TMEM57	55219	NM_018202	TMEM57	0	1	1	0	0	1	0	0	1	1	1	1	7
hsa-miR-423-5p	MIMAT0004748	ELMOD1	55531	NM_018712	ELMOD1	1	1	0	0	0	1	0	0	1	1	1	1	7
hsa-miR-423-5p	MIMAT0004748	MED29	55588	NM_017592	MED29	1	1	0	0	0	1	0	0	1	1	1	1	7
hsa-miR-423-5p	MIMAT0004748	TMEM127	55654	NM_017849	TMEM127	1	1	1	0	0	0	0	0	1	1	1	1	7
hsa-miR-423-5p	MIMAT0004748	MAP7D1	55700	NM_018067	MAP7D1	1	1	1	0	0	1	0	0	1	0	1	1	7
hsa-miR-423-5p	MIMAT0004748	ASF1B	55723	NM_018154	ASF1B	0	1	1	0	0	1	0	0	1	1	1	1	7
hsa-miR-423-5p	MIMAT0004748	FAM222B	55731	XM_005258002	FAM222B	1	1	1	0	0	1	0	0	0	1	1	1	7
hsa-miR-423-5p	MIMAT0004748	FAM212B	55924	NM_019099	FAM212B	1	1	1	0	0	1	0	0	0	1	1	1	7
hsa-miR-423-5p	MIMAT0004748	ERO1LB	56605	NM_019891	ERO1LB	1	1	0	0	0	1	0	0	1	1	1	1	7
hsa-miR-423-5p	MIMAT0004748	UBQLN4	56893	NM_020131	UBQLN4	1	1	0	0	0	1	0	0	1	1	1	1	7
hsa-miR-423-5p	MIMAT0004748	SH3GLB2	56904	NM_020145	SH3GLB2	1	1	0	0	0	1	0	0	1	1	1	1	7
hsa-miR-423-5p	MIMAT0004748	PAK6	56924	NM_001276718	PAK6	1	1	1	0	0	1	0	0	0	1	1	1	7
hsa-miR-423-5p	MIMAT0004748	ATXN7L3	56970	XM_005257526	ATXN7L3	1	1	1	0	0	1	0	0	0	1	1	1	7
hsa-miR-423-5p	MIMAT0004748	NAT14	57106	NM_020378	NAT14	0	1	1	0	0	1	0	0	1	1	1	1	7
hsa-miR-423-5p	MIMAT0004748	PGLYRP4	57115	NM_020393	PGLYRP4	1	1	0	0	0	1	0	0	1	1	1	1	7
hsa-miR-423-5p	MIMAT0004748	SLC44A2	57153	XM_005259998	SLC44A2	1	1	1	0	0	1	0	0	0	1	1	1	7
hsa-miR-423-5p	MIMAT0004748	CAMK1G	57172	XM_005273208	CAMK1G	1	1	1	0	0	1	0	0	0	1	1	1	7
hsa-miR-423-5p	MIMAT0004748	SEPN1	57190	NM_020451	SEPN1	1	1	1	0	0	1	0	0	0	1	1	1	7
hsa-miR-423-5p	MIMAT0004748	ATP8B2	57198	XM_005245355	ATP8B2	1	1	1	0	0	1	0	0	0	1	1	1	7
hsa-miR-423-5p	MIMAT0004748	VANGL2	57216	NM_020335	VANGL2	1	1	0	0	0	1	0	0	1	1	1	1	7
hsa-miR-423-5p	MIMAT0004748	GATAD2B	57459	NM_020699	GATAD2B	1	1	0	0	0	1	0	0	1	1	1	1	7
hsa-miR-423-5p	MIMAT0004748	MTA3	57504	XM_005264459	MTA3	1	1	1	0	0	1	0	0	0	1	1	1	7
hsa-miR-423-5p	MIMAT0004748	ARHGAP31	57514	NM_020754	ARHGAP31	1	1	0	0	0	1	0	0	1	1	1	1	7
hsa-miR-423-5p	MIMAT0004748	SRGAP1	57522	XM_005269042	SRGAP1	1	1	1	0	0	1	0	0	0	1	1	1	7
hsa-miR-423-5p	MIMAT0004748	NUFIP2	57532	NM_020772	NUFIP2	1	1	0	0	0	1	0	0	1	1	1	1	7
hsa-miR-423-5p	MIMAT0004748	MIB1	57534	NM_020774	MIB1	1	1	0	0	0	1	0	0	1	1	1	1	7
hsa-miR-423-5p	MIMAT0004748	2018-03-04	57574	NM_020814	2018-03-04	1	1	0	0	0	1	0	0	1	1	1	1	7
hsa-miR-423-5p	MIMAT0004748	FNIP2	57600	XM_005263156	FNIP2	1	1	1	0	0	1	0	0	0	1	1	1	7
hsa-miR-423-5p	MIMAT0004748	PITPNM2	57605	XM_005253583	PITPNM2	1	1	1	0	0	1	0	0	0	1	1	1	7
hsa-miR-423-5p	MIMAT0004748	KIAA1467	57613	NM_020853	KIAA1467	1	1	0	0	0	1	0	0	1	1	1	1	7
hsa-miR-423-5p	MIMAT0004748	ZNF317	57693	NM_020933	ZNF317	1	1	0	0	0	1	0	0	1	1	1	1	7
hsa-miR-423-5p	MIMAT0004748	PRX	57716	NM_020956	PRX	1	1	1	0	0	1	0	0	1	0	1	1	7
hsa-miR-423-5p	MIMAT0004748	MARK4	57787	NM_031417	MARK4	1	1	0	0	0	1	0	0	1	1	1	1	7
hsa-miR-423-5p	MIMAT0004748	RAB40C	57799	XM_005255460	RAB40C	1	1	1	0	0	1	0	0	0	1	1	1	7
hsa-miR-423-5p	MIMAT0004748	NGB	58157	NM_021257	NGB	1	1	0	0	0	1	0	0	1	1	1	1	7
hsa-miR-423-5p	MIMAT0004748	DLGAP3	58512	XM_005271091	DLGAP3	1	1	1	0	0	1	0	0	0	1	1	1	7
hsa-miR-423-5p	MIMAT0004748	PPCDC	60490	NM_021823	PPCDC	0	1	1	0	0	1	0	0	1	1	1	1	7
hsa-miR-423-5p	MIMAT0004748	BCORL1	63035	XM_005262452	BCORL1	1	1	1	0	0	1	0	0	0	1	1	1	7
hsa-miR-423-5p	MIMAT0004748	PKNOX2	63876	NM_022062	PKNOX2	0	1	1	0	0	1	0	0	1	1	1	1	7
hsa-miR-423-5p	MIMAT0004748	PCIF1	63935	NM_022104	PCIF1	1	1	1	0	0	1	0	0	1	0	1	1	7
hsa-miR-423-5p	MIMAT0004748	DMRTB1	63948	NM_033067	DMRTB1	0	1	1	0	0	1	0	0	1	1	1	1	7
hsa-miR-423-5p	MIMAT0004748	RBM26	64062	XM_005266491	RBM26	1	1	1	0	0	1	0	0	0	1	1	1	7
hsa-miR-423-5p	MIMAT0004748	NSD1	64324	NM_022455	NSD1	1	1	1	0	0	1	0	0	0	1	1	1	7
hsa-miR-423-5p	MIMAT0004748	HIF3A	64344	XM_005259152	HIF3A	1	1	1	0	0	1	0	0	0	1	1	1	7
hsa-miR-423-5p	MIMAT0004748	GORASP1	64689	NM_031899	GORASP1	1	1	1	0	0	1	0	0	1	0	1	1	7
hsa-miR-423-5p	MIMAT0004748	FAM160B2	64760	XM_005273601	FAM160B2	1	1	1	0	0	1	0	0	0	1	1	1	7
hsa-miR-423-5p	MIMAT0004748	C6orf106	64771	NM_024294	C6orf106	1	1	1	0	0	1	0	0	0	1	1	1	7
hsa-miR-423-5p	MIMAT0004748	KLC2	64837	NM_001134775	KLC2	1	1	1	0	0	1	0	0	0	1	1	1	7
hsa-miR-423-5p	MIMAT0004748	NOL6	65083	NM_022917	NOL6	1	1	1	0	0	1	0	0	0	1	1	1	7
hsa-miR-423-5p	MIMAT0004748	CHID1	66005	NM_001142675	CHID1	1	1	1	0	0	1	0	0	0	1	1	1	7
hsa-miR-423-5p	MIMAT0004748	PCYOX1L	78991	NM_024028	PCYOX1L	1	1	0	0	0	1	0	0	1	1	1	1	7
hsa-miR-423-5p	MIMAT0004748	METTL16	79066	NM_024086	METTL16	1	1	1	0	0	1	0	0	1	0	1	1	7
hsa-miR-423-5p	MIMAT0004748	ELOVL6	79071	NM_024090	ELOVL6	0	1	1	0	0	1	0	0	1	1	1	1	7
hsa-miR-423-5p	MIMAT0004748	SLC25A23	79085	NM_024103	SLC25A23	1	1	0	0	0	1	0	0	1	1	1	1	7
hsa-miR-423-5p	MIMAT0004748	DHX58	79132	NM_024119	DHX58	0	1	1	0	0	1	0	0	1	1	1	1	7
hsa-miR-423-5p	MIMAT0004748	C17orf62	79415	NM_001193653	C17orf62	1	1	1	0	0	1	0	0	0	1	1	1	7
hsa-miR-423-5p	MIMAT0004748	FYCO1	79443	XM_005265483	FYCO1	1	1	1	0	0	1	0	0	0	1	1	1	7
hsa-miR-423-5p	MIMAT0004748	MUL1	79594	XM_005246001	MUL1	1	1	1	0	0	1	0	0	0	1	1	1	7
hsa-miR-423-5p	MIMAT0004748	SRD5A3	79644	NM_024592	SRD5A3	1	1	0	0	0	1	0	0	1	1	1	1	7
hsa-miR-423-5p	MIMAT0004748	PEAK1	79834	XM_005254672	PEAK1	1	1	1	0	0	1	0	0	0	1	1	1	7
hsa-miR-423-5p	MIMAT0004748	PIP4K2C	79837	NM_024779	PIP4K2C	0	1	1	0	0	1	0	0	1	1	1	1	7
hsa-miR-423-5p	MIMAT0004748	THSD4	79875	NM_024817	THSD4	1	1	0	0	0	1	0	0	1	1	1	1	7
hsa-miR-423-5p	MIMAT0004748	CCDC134	79879	XM_005261749	CCDC134	1	1	1	0	0	1	0	0	0	1	1	1	7
hsa-miR-423-5p	MIMAT0004748	RIN3	79890	NM_024832	RIN3	1	1	0	0	0	1	0	0	1	1	1	1	7
hsa-miR-423-5p	MIMAT0004748	SYNDIG1	79953	XM_005260830	SYNDIG1	1	1	1	0	0	1	0	0	0	1	1	1	7
hsa-miR-423-5p	MIMAT0004748	WLS	79971	NM_024911	WLS	0	1	1	0	0	1	0	0	1	1	1	1	7
hsa-miR-423-5p	MIMAT0004748	NRSN2	80023	XM_005260832	NRSN2	1	1	1	0	0	1	0	0	0	1	1	1	7
hsa-miR-423-5p	MIMAT0004748	TMEM134	80194	NM_025124	TMEM134	1	1	1	0	0	1	0	0	0	1	1	1	7
hsa-miR-423-5p	MIMAT0004748	ORAI2	80228	NM_001271818	ORAI2	1	1	1	0	0	1	0	0	0	1	1	1	7
hsa-miR-423-5p	MIMAT0004748	C17orf70	80233	NM_025161	C17orf70	1	1	1	0	0	1	0	0	0	1	1	1	7
hsa-miR-423-5p	MIMAT0004748	PLEKHO2	80301	NM_025201	PLEKHO2	1	1	1	0	0	1	0	0	1	0	1	1	7
hsa-miR-423-5p	MIMAT0004748	EFHD1	80303	NM_025202	EFHD1	0	1	1	0	0	1	0	0	1	1	1	1	7
hsa-miR-423-5p	MIMAT0004748	SP6	80320	NM_001258248	SP6	1	1	1	0	0	1	0	0	0	1	1	1	7
hsa-miR-423-5p	MIMAT0004748	WNT10A	80326	NM_025216	WNT10A	1	1	0	0	0	1	0	0	1	1	1	1	7
hsa-miR-423-5p	MIMAT0004748	LIMD2	80774	NM_030576	LIMD2	1	1	0	0	0	1	0	0	1	1	1	1	7
hsa-miR-423-5p	MIMAT0004748	SH3BP5L	80851	NM_030645	SH3BP5L	1	1	0	0	0	1	0	0	1	1	1	1	7
hsa-miR-423-5p	MIMAT0004748	NDEL1	81565	XM_005256805	NDEL1	1	1	1	0	0	1	0	0	0	1	1	1	7
hsa-miR-423-5p	MIMAT0004748	LBH	81606	NM_030915	LBH	1	1	0	0	0	1	0	0	1	1	1	1	7
hsa-miR-423-5p	MIMAT0004748	SPRY4	81848	XM_005268517	SPRY4	1	1	1	0	0	1	0	0	0	1	1	1	7
hsa-miR-423-5p	MIMAT0004748	SCRT1	83482	NM_031309	SCRT1	1	1	1	0	0	1	0	1	0	0	1	1	7
hsa-miR-423-5p	MIMAT0004748	RTBDN	83546	NM_001270440	RTBDN	1	1	1	0	0	1	0	0	0	1	1	1	7
hsa-miR-423-5p	MIMAT0004748	C11orf68	83638	NM_001135635	C11orf68	1	1	0	0	0	1	0	1	0	1	1	1	7
hsa-miR-423-5p	MIMAT0004748	CALN1	83698	NM_001017440	CALN1	1	1	1	0	0	1	0	0	0	1	1	1	7
hsa-miR-423-5p	MIMAT0004748	KREMEN1	83999	NM_001039570	KREMEN1	1	1	1	0	0	1	0	0	0	1	1	1	7
hsa-miR-423-5p	MIMAT0004748	KAT8	84148	NM_182958	KAT8	1	1	1	0	0	1	0	0	1	0	1	1	7
hsa-miR-423-5p	MIMAT0004748	ARID5B	84159	NM_032199	ARID5B	0	1	1	0	0	1	0	0	1	1	1	1	7
hsa-miR-423-5p	MIMAT0004748	ELMOD3	84173	XM_005264596	ELMOD3	1	1	1	0	0	1	0	0	0	1	1	1	7
hsa-miR-423-5p	MIMAT0004748	CAMKK1	84254	XM_005256817	CAMKK1	1	1	1	0	0	1	0	0	0	1	1	1	7
hsa-miR-423-5p	MIMAT0004748	PHF6	84295	NM_032458	PHF6	1	1	0	0	0	1	0	0	1	1	1	1	7
hsa-miR-423-5p	MIMAT0004748	HVCN1	84329	XM_005253949	HVCN1	1	1	1	0	0	1	0	0	0	1	1	1	7
hsa-miR-423-5p	MIMAT0004748	RAB11FIP4	84440	NM_032932	RAB11FIP4	1	1	0	0	0	1	0	0	1	1	1	1	7
hsa-miR-423-5p	MIMAT0004748	ABLIM2	84448	XM_005248015	ABLIM2	1	1	1	0	0	1	0	0	0	1	1	1	7
hsa-miR-423-5p	MIMAT0004748	LCOR	84458	NM_032440	LCOR	1	1	0	0	0	1	0	0	1	1	1	1	7
hsa-miR-423-5p	MIMAT0004748	JPH4	84502	NM_032452	JPH4	0	1	1	0	0	1	0	0	1	1	1	1	7
hsa-miR-423-5p	MIMAT0004748	SRRM4	84530	NM_194286	SRRM4	0	1	0	0	0	1	0	1	1	1	1	1	7
hsa-miR-423-5p	MIMAT0004748	MRPL43	84545	NM_176792	MRPL43	1	1	0	0	0	1	0	0	1	1	1	1	7
hsa-miR-423-5p	MIMAT0004748	MAP1LC3A	84557	XM_005260577	MAP1LC3A	1	1	1	0	0	1	0	0	0	1	1	1	7
hsa-miR-423-5p	MIMAT0004748	TUBB6	84617	XM_005258159	TUBB6	1	1	1	0	0	1	0	0	0	1	1	1	7
hsa-miR-423-5p	MIMAT0004748	TNRC18	84629	NM_001080495	TNRC18	1	1	1	0	0	1	0	0	0	1	1	1	7
hsa-miR-423-5p	MIMAT0004748	TTBK1	84630	NM_032538	TTBK1	1	1	0	0	0	1	0	0	1	1	1	1	7
hsa-miR-423-5p	MIMAT0004748	GLYR1	84656	XM_005255637	GLYR1	1	1	1	0	0	1	0	0	0	1	1	1	7
hsa-miR-423-5p	MIMAT0004748	GLIS2	84662	XM_005255642	GLIS2	1	1	1	0	0	1	0	0	0	1	1	1	7
hsa-miR-423-5p	MIMAT0004748	PRRC2B	84726	XM_005272227	PRRC2B	1	1	1	0	0	1	0	0	0	1	1	1	7
hsa-miR-423-5p	MIMAT0004748	SUV420H2	84787	NM_032701	SUV420H2	1	1	0	0	0	1	0	0	1	1	1	1	7
hsa-miR-423-5p	MIMAT0004748	AGPAT9	84803	NM_032717	AGPAT9	1	1	0	0	0	1	0	0	1	1	1	1	7
hsa-miR-423-5p	MIMAT0004748	C1orf198	84886	NM_001136494	C1orf198	1	1	1	0	0	1	0	0	0	1	1	1	7
hsa-miR-423-5p	MIMAT0004748	CORO6	84940	XM_005258047	CORO6	1	1	1	0	0	1	0	0	0	1	1	1	7
hsa-miR-423-5p	MIMAT0004748	RELT	84957	NM_032871	RELT	1	1	1	0	0	1	0	0	0	1	1	1	7
hsa-miR-423-5p	MIMAT0004748	ATG4D	84971	NM_001281504	ATG4D	1	1	1	0	0	1	0	0	0	1	1	1	7
hsa-miR-423-5p	MIMAT0004748	CEP19	84984	XM_005269370	CEP19	1	1	1	0	0	1	0	0	0	1	1	1	7
hsa-miR-423-5p	MIMAT0004748	NAV1	89796	XM_005245572	NAV1	1	1	1	0	0	1	0	0	0	1	1	1	7
hsa-miR-423-5p	MIMAT0004748	MVB12B	89853	XM_005252297	MVB12B	1	1	1	0	0	1	0	0	0	1	1	1	7
hsa-miR-423-5p	MIMAT0004748	FAM181A	90050	NM_138344	FAM181A	0	1	1	0	0	1	0	0	1	1	1	1	7
hsa-miR-423-5p	MIMAT0004748	TSPAN18	90139	XM_005253217	TSPAN18	1	1	1	0	0	1	0	0	0	1	1	1	7
hsa-miR-423-5p	MIMAT0004748	ZSWIM1	90204	NM_080603	ZSWIM1	0	1	1	0	0	1	0	0	1	1	1	1	7
hsa-miR-423-5p	MIMAT0004748	BMF	90427	XM_005254758	BMF	1	1	1	0	0	1	0	0	0	1	1	1	7
hsa-miR-423-5p	MIMAT0004748	FMNL3	91010	NM_175736	FMNL3	1	1	1	0	1	1	0	0	0	0	1	1	7
hsa-miR-423-5p	MIMAT0004748	DERL3	91319	NM_198440	DERL3	1	1	1	0	0	1	0	0	1	0	1	1	7
hsa-miR-423-5p	MIMAT0004748	RCCD1	91433	NM_033544	RCCD1	0	1	1	0	0	1	0	1	0	1	1	1	7
hsa-miR-423-5p	MIMAT0004748	RNF185	91445	NM_152267	RNF185	1	1	0	0	0	1	0	0	1	1	1	1	7
hsa-miR-423-5p	MIMAT0004748	TMEM129	92305	NM_001127266	TMEM129	1	1	1	0	0	1	0	0	0	1	1	1	7
hsa-miR-423-5p	MIMAT0004748	MYOCD	93649	XM_005256864	MYOCD	1	1	1	0	0	1	0	0	0	1	1	1	7
hsa-miR-423-5p	MIMAT0004748	ABCC12	94160	NM_033226	ABCC12	0	1	1	0	0	1	0	0	1	1	1	1	7
hsa-miR-423-5p	MIMAT0004748	OPN4	94233	NM_001030015	OPN4	1	1	1	0	0	1	0	0	0	1	1	1	7
hsa-miR-423-5p	MIMAT0004748	KLHDC7B	113730	NM_138433	KLHDC7B	1	1	1	0	0	1	0	0	0	1	1	1	7
hsa-miR-423-5p	MIMAT0004748	LMTK3	114783	NM_001080434	LMTK3	0	1	1	0	0	1	0	0	1	1	1	1	7
hsa-miR-423-5p	MIMAT0004748	GALNT13	114805	NM_052917	GALNT13	1	1	0	0	0	1	0	0	1	1	1	1	7
hsa-miR-423-5p	MIMAT0004748	LENG8	114823	XM_005258482	LENG8	1	1	1	0	0	1	0	0	0	1	1	1	7
hsa-miR-423-5p	MIMAT0004748	LENG8	114823	XM_005277240	LENG8	1	1	1	0	0	1	0	0	0	1	1	1	7
hsa-miR-423-5p	MIMAT0004748	C1QTNF6	114904	XM_005261327	C1QTNF6	1	1	1	0	0	1	0	0	0	1	1	1	7
hsa-miR-423-5p	MIMAT0004748	ZNF618	114991	NM_133374	ZNF618	1	1	1	0	0	1	0	0	1	0	1	1	7
hsa-miR-423-5p	MIMAT0004748	ARL11	115761	NM_138450	ARL11	0	1	1	1	0	1	0	0	1	0	1	1	7
hsa-miR-423-5p	MIMAT0004748	APOA5	116519	NM_052968	APOA5	0	1	1	0	0	1	0	0	1	1	1	1	7
hsa-miR-423-5p	MIMAT0004748	AGAP1	116987	NM_001037131	AGAP1	1	1	1	0	0	1	0	0	0	1	1	1	7
hsa-miR-423-5p	MIMAT0004748	AGAP3	116988	NM_031946	AGAP3	1	1	1	0	0	1	0	0	1	0	1	1	7
hsa-miR-423-5p	MIMAT0004748	SNX20	124460	NM_153337	SNX20	1	1	1	0	0	1	0	0	0	1	1	1	7
hsa-miR-423-5p	MIMAT0004748	WFIKKN2	124857	NM_175575	WFIKKN2	1	1	1	0	0	1	0	0	1	0	1	1	7
hsa-miR-423-5p	MIMAT0004748	TSHZ2	128553	NM_173485	TSHZ2	1	1	0	0	0	1	0	1	1	0	1	1	7
hsa-miR-423-5p	MIMAT0004748	SGSM1	129049	NM_001039948	SGSM1	1	1	1	0	0	1	0	0	0	1	1	1	7
hsa-miR-423-5p	MIMAT0004748	NACC2	138151	XM_005263395	NACC2	1	1	1	0	0	1	0	0	0	1	1	1	7
hsa-miR-423-5p	MIMAT0004748	AMER1	139285	NM_152424	AMER1	1	1	0	0	0	1	0	0	1	1	1	1	7
hsa-miR-423-5p	MIMAT0004748	ZBTB46	140685	XM_005260197	ZBTB46	1	1	1	0	0	1	0	0	0	1	1	1	7
hsa-miR-423-5p	MIMAT0004748	ADAMTS14	140766	NM_139155	ADAMTS14	1	1	1	0	0	1	0	0	0	1	1	1	7
hsa-miR-423-5p	MIMAT0004748	ASB14	142686	NM_001142733	ASB14	1	1	1	0	0	1	0	0	0	1	1	1	7
hsa-miR-423-5p	MIMAT0004748	TMEM120B	144404	NM_001080825	TMEM120B	1	1	1	0	0	1	0	0	0	1	1	1	7
hsa-miR-423-5p	MIMAT0004748	E2F7	144455	NM_203394	E2F7	1	1	0	0	0	1	0	0	1	1	1	1	7
hsa-miR-423-5p	MIMAT0004748	HAPLN3	145864	XM_005254871	HAPLN3	1	1	1	0	0	1	0	0	0	1	1	1	7
hsa-miR-423-5p	MIMAT0004748	ZNF362	149076	XM_005270508	ZNF362	1	1	1	0	0	1	0	0	0	1	1	1	7
hsa-miR-423-5p	MIMAT0004748	PDIK1L	149420	XM_005245743	PDIK1L	1	1	1	0	0	1	0	0	0	1	1	1	7
hsa-miR-423-5p	MIMAT0004748	GLIPR2	152007	XM_005251370	GLIPR2	1	1	1	0	0	1	0	0	0	1	1	1	7
hsa-miR-423-5p	MIMAT0004748	CCDC13	152206	NM_144719	CCDC13	1	1	0	0	0	1	0	0	1	1	1	1	7
hsa-miR-423-5p	MIMAT0004748	ZNF827	152485	NM_178835	ZNF827	1	1	0	0	0	1	0	0	1	1	1	1	7
hsa-miR-423-5p	MIMAT0004748	RBM33	155435	XM_005249531	RBM33	1	1	1	0	0	1	0	0	0	1	1	1	7
hsa-miR-423-5p	MIMAT0004748	USP51	158880	XM_005261991	USP51	1	1	1	0	0	1	0	0	0	1	1	1	7
hsa-miR-423-5p	MIMAT0004748	KANK4	163782	NM_181712	KANK4	1	1	0	0	0	1	0	0	1	1	1	1	7
hsa-miR-423-5p	MIMAT0004748	CDC20B	166979	NM_001170402	CDC20B	1	1	1	0	0	1	0	0	0	1	1	1	7
hsa-miR-423-5p	MIMAT0004748	SCAMP5	192683	NM_001178111	SCAMP5	1	1	1	0	0	1	0	0	0	1	1	1	7
hsa-miR-423-5p	MIMAT0004748	ANO6	196527	NM_001204803	ANO6	1	1	1	0	0	1	0	0	0	1	1	1	7
hsa-miR-423-5p	MIMAT0004748	ZNF585A	199704	XM_005258615	ZNF585A	1	1	1	0	0	1	0	0	0	1	1	1	7
hsa-miR-423-5p	MIMAT0004748	PATL1	219988	NM_152716	PATL1	1	1	0	0	0	1	0	0	1	1	1	1	7
hsa-miR-423-5p	MIMAT0004748	RNF214	257160	NM_207343	RNF214	1	1	0	0	0	1	0	1	0	1	1	1	7
hsa-miR-423-5p	MIMAT0004748	HSPA12A	259217	XM_005269672	HSPA12A	1	1	1	0	0	1	0	0	0	1	1	1	7
hsa-miR-423-5p	MIMAT0004748	HECTD4	283450	XM_005253871	HECTD4	1	1	1	0	0	1	0	0	0	1	1	1	7
hsa-miR-423-5p	MIMAT0004748	ZDHHC22	283576	NM_174976	ZDHHC22	1	1	0	0	0	1	0	0	1	1	1	1	7
hsa-miR-423-5p	MIMAT0004748	SYPL2	284612	NM_001040709	SYPL2	1	1	0	0	0	1	0	0	1	1	1	1	7
hsa-miR-423-5p	MIMAT0004748	TUSC1	286319	NM_001004125	TUSC1	0	1	1	0	0	1	0	0	1	1	1	1	7
hsa-miR-423-5p	MIMAT0004748	FAM78A	286336	NM_033387	FAM78A	0	1	1	0	0	1	0	0	1	1	1	1	7
hsa-miR-423-5p	MIMAT0004748	SLC27A1	376497	NM_198580	SLC27A1	0	1	1	0	0	1	0	0	1	1	1	1	7
hsa-miR-423-5p	MIMAT0004748	GPR153	387509	XM_005263456	GPR153	1	1	1	0	0	1	0	0	0	1	1	1	7
hsa-miR-423-5p	MIMAT0004748	SHISA6	388336	NM_207386	SHISA6	1	1	1	0	0	1	0	0	0	1	1	1	7
hsa-miR-423-5p	MIMAT0004748	SLC6A17	388662	NM_001010898	SLC6A17	1	1	0	0	0	1	0	0	1	1	1	1	7
hsa-miR-423-5p	MIMAT0004748	ZBTB34	403341	XM_005251989	ZBTB34	1	1	1	0	0	1	0	0	0	1	1	1	7
hsa-miR-423-5p	MIMAT0004748	HAPLN4	404037	NM_023002	HAPLN4	1	1	0	0	0	1	0	0	1	1	1	1	7
hsa-miR-423-5p	MIMAT0004748	NOMO3	408050	NM_001004067	NOMO3	0	1	1	0	0	1	0	0	1	1	1	1	7
hsa-miR-423-5p	MIMAT0004748	C10orf105	414152	NM_001164375	C10orf105	1	1	1	0	0	1	0	0	0	1	1	1	7
hsa-miR-423-5p	MIMAT0004748	IQSEC3	440073	NM_001170738	IQSEC3	1	1	1	0	0	1	0	0	0	1	1	1	7
hsa-miR-423-5p	MIMAT0004748	RNASEK	440400	NM_001004333	RNASEK	0	1	1	0	0	1	0	0	1	1	1	1	7
hsa-miR-423-5p	MIMAT0004748	TMEM151B	441151	NM_001137560	TMEM151B	1	1	1	0	0	1	0	0	0	1	1	1	7
hsa-miR-423-5p	MIMAT0004748	TSPAN11	441631	XM_005253378	TSPAN11	1	1	1	0	0	1	0	0	0	1	1	1	7
hsa-miR-423-5p	MIMAT0004748	RNF165	494470	XM_005258281	RNF165	1	1	1	0	0	1	0	0	0	1	1	1	7
hsa-miR-423-5p	MIMAT0004748	PEF1	553115	NM_012392	PEF1	1	1	0	0	0	1	0	0	1	1	1	1	7
hsa-miR-423-5p	MIMAT0004748	CPLX3	594855	NM_001030005	CPLX3	0	1	1	0	0	1	0	0	1	1	1	1	7
hsa-miR-423-5p	MIMAT0004748	ZNF704	619279	XM_005251279	ZNF704	1	1	1	0	0	1	0	0	0	1	1	1	7
hsa-miR-423-5p	MIMAT0004748	PCP4L1	654790	NM_001102566	PCP4L1	1	1	0	0	0	1	0	0	1	1	1	1	7
hsa-miR-423-5p	MIMAT0004748	POM121C	100101267	XM_005250082	POM121C	1	1	1	0	0	1	0	0	0	1	1	1	7
hsa-miR-423-5p	MIMAT0004748	ZNF559-ZNF177	100529215	NM_001202425	ZNF559-ZNF177	1	1	1	0	0	1	0	0	0	1	1	1	7
hsa-miR-423-5p	MIMAT0004748	ACADS	35	NM_000017	ACADS	1	0	1	0	0	1	0	0	1	1	1	1	7
hsa-miR-423-5p	MIMAT0004748	ADCY9	115	NM_001116	ADCY9	1	0	1	0	0	1	0	0	1	1	1	1	7
hsa-miR-423-5p	MIMAT0004748	ADRA1D	146	NM_000678	ADRA1D	1	0	1	0	0	1	0	0	1	1	1	1	7
hsa-miR-423-5p	MIMAT0004748	AKT2	208	NM_001626	AKT2	1	0	1	0	0	1	0	0	1	1	1	1	7
hsa-miR-423-5p	MIMAT0004748	ABCD1	215	NM_000033	ABCD1	1	0	1	0	0	1	0	0	1	1	1	1	7
hsa-miR-423-5p	MIMAT0004748	BCKDHB	594	NM_183050	BCKDHB	1	0	1	0	0	1	0	0	1	1	1	1	7
hsa-miR-423-5p	MIMAT0004748	BOK	666	NM_032515	BOK	1	0	1	0	0	1	0	0	1	1	1	1	7
hsa-miR-423-5p	MIMAT0004748	CACNA1B	774	NM_000718	CACNA1B	1	0	1	0	0	1	0	0	1	1	1	1	7
hsa-miR-423-5p	MIMAT0004748	CAPN6	827	NM_014289	CAPN6	1	0	1	0	0	1	0	0	1	1	1	1	7
hsa-miR-423-5p	MIMAT0004748	CDSN	1041	NM_001264	CDSN	1	0	1	0	0	1	0	0	1	1	1	1	7
hsa-miR-423-5p	MIMAT0004748	CHRNA4	1137	NM_000744	CHRNA4	1	0	1	0	0	1	0	0	1	1	1	1	7
hsa-miR-423-5p	MIMAT0004748	AP1S1	1174	NM_001283	AP1S1	1	0	1	0	0	1	0	0	1	1	1	1	7
hsa-miR-423-5p	MIMAT0004748	CLCN6	1185	NM_001286	CLCN6	1	0	1	0	0	1	0	0	1	1	1	1	7
hsa-miR-423-5p	MIMAT0004748	CLCNKB	1188	NM_000085	CLCNKB	1	0	1	0	0	1	0	0	1	1	1	1	7
hsa-miR-423-5p	MIMAT0004748	CMKLR1	1240	NM_001142343	CMKLR1	1	0	1	1	0	1	0	0	0	1	1	1	7
hsa-miR-423-5p	MIMAT0004748	COL9A3	1299	NM_001853	COL9A3	1	0	1	0	0	1	0	0	1	1	1	1	7
hsa-miR-423-5p	MIMAT0004748	NCAN	1463	NM_004386	NCAN	1	0	1	0	0	1	0	0	1	1	1	1	7
hsa-miR-423-5p	MIMAT0004748	CTF1	1489	NM_001330	CTF1	1	0	1	0	0	1	0	0	1	1	1	1	7
hsa-miR-423-5p	MIMAT0004748	DHCR24	1718	NM_014762	DHCR24	1	0	1	0	0	1	0	0	1	1	1	1	7
hsa-miR-423-5p	MIMAT0004748	DOCK1	1793	NM_001380	DOCK1	1	0	1	0	0	1	0	0	1	1	1	1	7
hsa-miR-423-5p	MIMAT0004748	E2F2	1870	NM_004091	E2F2	1	0	1	0	0	1	0	0	1	1	1	1	7
hsa-miR-423-5p	MIMAT0004748	S1PR3	1903	NM_005226	S1PR3	1	0	1	0	0	1	0	0	1	1	1	1	7
hsa-miR-423-5p	MIMAT0004748	ELF4	2000	NM_001421	ELF4	1	0	1	0	0	1	0	0	1	1	1	1	7
hsa-miR-423-5p	MIMAT0004748	EMP2	2013	NM_001424	EMP2	1	0	1	0	0	1	0	0	1	1	1	1	7
hsa-miR-423-5p	MIMAT0004748	EN1	2019	NM_001426	EN1	1	0	1	0	0	1	0	0	1	1	1	1	7
hsa-miR-423-5p	MIMAT0004748	ENG	2022	NM_000118	ENG	1	0	1	0	0	1	0	0	1	1	1	1	7
hsa-miR-423-5p	MIMAT0004748	DMTN	2039	NM_001978	DMTN	1	0	1	0	0	1	0	0	1	1	1	1	7
hsa-miR-423-5p	MIMAT0004748	EPHA8	2046	NM_020526	EPHA8	1	0	1	0	0	1	0	0	1	1	1	1	7
hsa-miR-423-5p	MIMAT0004748	CLN8	2055	NM_018941	CLN8	1	0	1	0	0	1	0	0	1	1	1	1	7
hsa-miR-423-5p	MIMAT0004748	FOXM1	2305	NM_202002	FOXM1	1	0	1	0	1	1	0	0	0	1	1	1	7
hsa-miR-423-5p	MIMAT0004748	FLT4	2324	NM_182925	FLT4	1	0	1	0	0	1	0	0	1	1	1	1	7
hsa-miR-423-5p	MIMAT0004748	GFER	2671	NM_005262	GFER	1	0	1	0	0	1	0	0	1	1	1	1	7
hsa-miR-423-5p	MIMAT0004748	GNA12	2768	NM_007353	GNA12	1	0	1	0	0	1	0	0	1	1	1	1	7
hsa-miR-423-5p	MIMAT0004748	GNAI2	2771	NM_002070	GNAI2	1	0	1	0	0	1	0	1	1	0	1	1	7
hsa-miR-423-5p	MIMAT0004748	GNB3	2784	NM_002075	GNB3	1	0	1	0	0	1	0	0	1	1	1	1	7
hsa-miR-423-5p	MIMAT0004748	GPC1	2817	NM_002081	GPC1	1	0	1	0	0	1	0	0	1	1	1	1	7
hsa-miR-423-5p	MIMAT0004748	GRID1	2894	NM_017551	GRID1	1	0	1	0	0	1	0	0	1	1	1	1	7
hsa-miR-423-5p	MIMAT0004748	GRIK3	2899	NM_000831	GRIK3	1	0	1	0	0	1	0	0	1	1	1	1	7
hsa-miR-423-5p	MIMAT0004748	NDST1	3340	NM_001543	NDST1	1	0	1	0	0	1	0	1	1	0	1	1	7
hsa-miR-423-5p	MIMAT0004748	IGF2	3481	NM_000612	IGF2	1	0	1	1	0	1	0	0	0	1	1	1	7
hsa-miR-423-5p	MIMAT0004748	IGFBP2	3485	NM_000597	IGFBP2	1	0	1	0	0	1	0	0	1	1	1	1	7
hsa-miR-423-5p	MIMAT0004748	IGHMBP2	3508	NM_002180	IGHMBP2	1	0	1	0	0	1	0	0	1	1	1	1	7
hsa-miR-423-5p	MIMAT0004748	JAK3	3718	XM_005259896	JAK3	1	0	1	1	0	1	0	0	0	1	1	1	7
hsa-miR-423-5p	MIMAT0004748	KCNS1	3787	NM_002251	KCNS1	1	0	1	0	0	1	0	0	1	1	1	1	7
hsa-miR-423-5p	MIMAT0004748	LAD1	3898	NM_005558	LAD1	1	0	1	0	0	1	0	0	1	1	1	1	7
hsa-miR-423-5p	MIMAT0004748	LIMK1	3984	NM_002314	LIMK1	1	0	1	0	0	1	0	0	1	1	1	1	7
hsa-miR-423-5p	MIMAT0004748	LRP1	4035	NM_002332	LRP1	1	0	1	0	0	1	0	0	1	1	1	1	7
hsa-miR-423-5p	MIMAT0004748	SMAD7	4092	NM_005904	SMAD7	1	0	1	0	0	1	0	0	1	1	1	1	7
hsa-miR-423-5p	MIMAT0004748	MDM4	4194	NM_002393	MDM4	1	0	1	0	0	1	0	0	1	1	1	1	7
hsa-miR-423-5p	MIMAT0004748	KMT2A	4297	NM_005933	KMT2A	1	0	1	0	0	1	0	1	1	0	1	1	7
hsa-miR-423-5p	MIMAT0004748	MNT	4335	NM_020310	MNT	1	0	1	0	0	1	0	0	1	1	1	1	7
hsa-miR-423-5p	MIMAT0004748	MPV17	4358	NM_002437	MPV17	1	0	1	0	0	1	0	0	1	1	1	1	7
hsa-miR-423-5p	MIMAT0004748	MYH10	4628	NM_005964	MYH10	1	0	1	0	0	1	0	1	1	0	1	1	7
hsa-miR-423-5p	MIMAT0004748	NFIB	4781	NM_005596	NFIB	1	0	1	0	0	1	0	1	1	0	1	1	7
hsa-miR-423-5p	MIMAT0004748	NFIX	4784	NM_002501	NFIX	1	0	1	0	0	1	0	1	1	0	1	1	7
hsa-miR-423-5p	MIMAT0004748	NKG7	4818	NM_005601	NKG7	1	0	1	0	0	1	0	0	1	1	1	1	7
hsa-miR-423-5p	MIMAT0004748	NOS3	4846	NM_000603	NOS3	1	0	1	0	0	1	0	0	1	1	1	1	7
hsa-miR-423-5p	MIMAT0004748	NOTCH2	4853	NM_024408	NOTCH2	1	0	1	0	0	1	0	0	1	1	1	1	7
hsa-miR-423-5p	MIMAT0004748	SLC11A2	4891	NM_000617	SLC11A2	1	0	1	0	1	1	0	0	1	0	1	1	7
hsa-miR-423-5p	MIMAT0004748	NUCB1	4924	NM_006184	NUCB1	1	0	1	0	0	1	0	0	1	1	1	1	7
hsa-miR-423-5p	MIMAT0004748	ODC1	4953	NM_002539	ODC1	1	0	1	0	1	0	0	1	1	0	1	1	7
hsa-miR-423-5p	MIMAT0004748	ORM1	5004	NM_000607	ORM1	1	0	1	0	0	1	0	0	1	1	1	1	7
hsa-miR-423-5p	MIMAT0004748	ORM2	5005	NM_000608	ORM2	1	0	1	0	0	1	0	0	1	1	1	1	7
hsa-miR-423-5p	MIMAT0004748	PDCD1	5133	NM_005018	PDCD1	1	0	1	0	0	1	0	0	1	1	1	1	7
hsa-miR-423-5p	MIMAT0004748	PDGFRB	5159	NM_002609	PDGFRB	1	0	1	0	0	1	0	0	1	1	1	1	7
hsa-miR-423-5p	MIMAT0004748	SERPINB9	5272	NM_004155	SERPINB9	1	0	1	0	0	1	0	0	1	1	1	1	7
hsa-miR-423-5p	MIMAT0004748	PIGR	5284	NM_002644	PIGR	1	0	1	0	0	1	0	0	1	1	1	1	7
hsa-miR-423-5p	MIMAT0004748	PLEK	5341	NM_002664	PLEK	1	0	1	0	0	1	0	0	1	1	1	1	7
hsa-miR-423-5p	MIMAT0004748	POLR2C	5432	NM_032940	POLR2C	1	0	1	0	0	1	0	0	1	1	1	1	7
hsa-miR-423-5p	MIMAT0004748	PPP2R5B	5526	NM_006244	PPP2R5B	1	0	1	0	0	1	0	0	1	1	1	1	7
hsa-miR-423-5p	MIMAT0004748	PPP5C	5536	NM_006247	PPP5C	1	0	1	0	0	1	0	0	1	1	1	1	7
hsa-miR-423-5p	MIMAT0004748	PKIA	5569	NM_181839	PKIA	1	0	1	0	1	1	0	1	0	0	1	1	7
hsa-miR-423-5p	MIMAT0004748	PRSS8	5652	NM_002773	PRSS8	1	0	1	0	0	1	0	0	1	1	1	1	7
hsa-miR-423-5p	MIMAT0004748	PTK6	5753	NM_005975	PTK6	1	0	1	0	0	1	0	0	1	1	1	1	7
hsa-miR-423-5p	MIMAT0004748	PYGB	5834	NM_002862	PYGB	1	0	1	0	1	1	0	0	1	0	1	1	7
hsa-miR-423-5p	MIMAT0004748	PRPH2	5961	NM_000322	PRPH2	1	0	1	0	0	1	0	0	1	1	1	1	7
hsa-miR-423-5p	MIMAT0004748	UPF1	5976	NM_002911	UPF1	1	0	1	0	0	1	0	0	1	1	1	1	7
hsa-miR-423-5p	MIMAT0004748	RET	5979	NM_020975	RET	1	0	1	0	0	1	0	0	1	1	1	1	7
hsa-miR-423-5p	MIMAT0004748	TRIM27	5987	NM_006510	TRIM27	1	0	1	1	0	1	0	0	0	1	1	1	7
hsa-miR-423-5p	MIMAT0004748	SCN4A	6329	NM_000334	SCN4A	1	0	1	0	1	1	0	0	1	0	1	1	7
hsa-miR-423-5p	MIMAT0004748	CX3CL1	6376	NM_002996	CX3CL1	1	0	1	0	0	1	0	0	1	1	1	1	7
hsa-miR-423-5p	MIMAT0004748	SLC4A1	6521	NM_000342	SLC4A1	1	0	1	0	0	1	0	0	1	1	1	1	7
hsa-miR-423-5p	MIMAT0004748	SLC9A1	6548	NM_003047	SLC9A1	1	0	1	0	0	1	0	0	1	1	1	1	7
hsa-miR-423-5p	MIMAT0004748	SNAPC2	6618	NM_003083	SNAPC2	1	0	1	0	0	1	0	0	1	1	1	1	7
hsa-miR-423-5p	MIMAT0004748	FSCN1	6624	NM_003088	FSCN1	1	0	1	0	0	1	0	0	1	1	1	1	7
hsa-miR-423-5p	MIMAT0004748	STK10	6793	NM_005990	STK10	1	0	1	0	0	1	0	0	1	1	1	1	7
hsa-miR-423-5p	MIMAT0004748	SUPT6H	6830	NM_003170	SUPT6H	1	0	1	0	0	1	0	1	1	0	1	1	7
hsa-miR-423-5p	MIMAT0004748	VAMP2	6844	NM_014232	VAMP2	1	0	1	0	1	1	0	0	1	0	1	1	7
hsa-miR-423-5p	MIMAT0004748	TBXA2R	6915	NM_001060	TBXA2R	1	0	1	0	0	1	0	0	1	1	1	1	7
hsa-miR-423-5p	MIMAT0004748	TCEB2	6923	NM_007108	TCEB2	1	0	1	0	0	1	0	0	1	1	1	1	7
hsa-miR-423-5p	MIMAT0004748	TFAP2A	7020	NM_001032280	TFAP2A	1	0	1	1	0	1	0	0	0	1	1	1	7
hsa-miR-423-5p	MIMAT0004748	NR2F2	7026	NM_021005	NR2F2	1	0	1	0	0	1	0	0	1	1	1	1	7
hsa-miR-423-5p	MIMAT0004748	THBS3	7059	NM_007112	THBS3	1	0	1	0	0	1	0	0	1	1	1	1	7
hsa-miR-423-5p	MIMAT0004748	TP73	7161	NM_005427	TP73	1	0	1	0	0	1	0	0	1	1	1	1	7
hsa-miR-423-5p	MIMAT0004748	TRPM2	7226	NM_003307	TRPM2	1	0	1	0	0	1	0	0	1	1	1	1	7
hsa-miR-423-5p	MIMAT0004748	TULP1	7287	NM_003322	TULP1	1	0	1	0	0	1	0	0	1	1	1	1	7
hsa-miR-423-5p	MIMAT0004748	VIPR2	7434	NM_003382	VIPR2	1	0	1	0	0	1	0	0	1	1	1	1	7
hsa-miR-423-5p	MIMAT0004748	YES1	7525	NM_005433	YES1	1	0	1	0	0	1	0	0	1	1	1	1	7
hsa-miR-423-5p	MIMAT0004748	ZNF84	7637	NM_003428	ZNF84	1	0	1	0	1	1	0	0	1	0	1	1	7
hsa-miR-423-5p	MIMAT0004748	PRDM2	7799	NM_012231	PRDM2	1	0	1	0	0	1	0	0	1	1	1	1	7
hsa-miR-423-5p	MIMAT0004748	LAPTM5	7805	NM_006762	LAPTM5	1	0	1	0	0	1	0	0	1	1	1	1	7
hsa-miR-423-5p	MIMAT0004748	MAPKAPK3	7867	NM_004635	MAPKAPK3	1	0	1	0	1	1	0	0	1	0	1	1	7
hsa-miR-423-5p	MIMAT0004748	TFEB	7942	NM_007162	TFEB	1	0	1	0	1	1	0	0	1	0	1	1	7
hsa-miR-423-5p	MIMAT0004748	MAFK	7975	NM_002360	MAFK	1	0	1	0	0	1	0	0	1	1	1	1	7
hsa-miR-423-5p	MIMAT0004748	BRD3	8019	NM_007371	BRD3	1	0	1	0	0	1	0	0	1	1	1	1	7
hsa-miR-423-5p	MIMAT0004748	LHX3	8022	XM_005263410	LHX3	1	0	1	1	0	1	0	0	0	1	1	1	7
hsa-miR-423-5p	MIMAT0004748	ELL	8178	NM_006532	ELL	1	0	1	0	0	1	0	0	1	1	1	1	7
hsa-miR-423-5p	MIMAT0004748	F8A1	8263	NM_012151	F8A1	1	0	1	0	1	1	0	0	0	1	1	1	7
hsa-miR-423-5p	MIMAT0004748	FZD7	8324	NM_003507	FZD7	1	0	1	0	0	1	0	0	1	1	1	1	7
hsa-miR-423-5p	MIMAT0004748	PLA2G6	8398	NM_001199562	PLA2G6	1	0	1	0	1	1	0	1	0	0	1	1	7
hsa-miR-423-5p	MIMAT0004748	PLA2G6	8398	NM_001004426	PLA2G6	1	0	1	0	1	1	0	1	0	0	1	1	7
hsa-miR-423-5p	MIMAT0004748	PLA2G6	8398	NM_003560	PLA2G6	1	0	1	0	1	1	0	1	0	0	1	1	7
hsa-miR-423-5p	MIMAT0004748	ULK1	8408	NM_003565	ULK1	1	0	1	0	0	1	0	0	1	1	1	1	7
hsa-miR-423-5p	MIMAT0004748	ENC1	8507	NM_003633	ENC1	1	0	1	0	0	1	0	1	1	0	1	1	7
hsa-miR-423-5p	MIMAT0004748	GCM1	8521	NM_003643	GCM1	1	0	1	0	0	1	0	0	1	1	1	1	7
hsa-miR-423-5p	MIMAT0004748	DGKE	8526	NM_003647	DGKE	1	0	1	0	0	1	0	0	1	1	1	1	7
hsa-miR-423-5p	MIMAT0004748	PDXK	8566	NM_003681	PDXK	1	0	1	0	0	1	0	0	1	1	1	1	7
hsa-miR-423-5p	MIMAT0004748	ADAM19	8728	NM_033274	ADAM19	1	0	1	0	1	1	0	0	1	0	1	1	7
hsa-miR-423-5p	MIMAT0004748	TNFSF12	8742	NM_003809	TNFSF12	1	0	1	0	0	1	0	0	1	1	1	1	7
hsa-miR-423-5p	MIMAT0004748	TNFRSF10D	8793	NM_003840	TNFRSF10D	1	0	1	0	0	1	0	0	1	1	1	1	7
hsa-miR-423-5p	MIMAT0004748	NRP1	8829	NM_003873	NRP1	1	0	1	0	0	1	0	0	1	1	1	1	7
hsa-miR-423-5p	MIMAT0004748	BSN	8927	NM_003458	BSN	1	0	1	0	0	1	0	0	1	1	1	1	7
hsa-miR-423-5p	MIMAT0004748	CDK5R2	8941	NM_003936	CDK5R2	1	0	1	0	0	1	0	0	1	1	1	1	7
hsa-miR-423-5p	MIMAT0004748	MTA1	9112	NM_004689	MTA1	1	0	1	0	0	1	0	0	1	1	1	1	7
hsa-miR-423-5p	MIMAT0004748	CYTH3	9265	NM_004227	CYTH3	1	0	1	0	0	1	0	0	1	1	1	1	7
hsa-miR-423-5p	MIMAT0004748	H6PD	9563	NM_004285	H6PD	1	0	1	0	1	1	0	0	1	0	1	1	7
hsa-miR-423-5p	MIMAT0004748	SOX13	9580	NM_005686	SOX13	1	0	1	0	0	1	0	0	1	1	1	1	7
hsa-miR-423-5p	MIMAT0004748	CELSR1	9620	NM_014246	CELSR1	1	0	1	0	0	1	0	0	1	1	1	1	7
hsa-miR-423-5p	MIMAT0004748	TCL1B	9623	NM_004918	TCL1B	1	0	1	0	1	1	0	0	0	1	1	1	7
hsa-miR-423-5p	MIMAT0004748	ZNF592	9640	NM_014630	ZNF592	1	0	1	0	0	1	0	0	1	1	1	1	7
hsa-miR-423-5p	MIMAT0004748	DZIP3	9666	NM_014648	DZIP3	1	0	1	0	0	1	0	0	1	1	1	1	7
hsa-miR-423-5p	MIMAT0004748	SLC25A44	9673	NM_014655	SLC25A44	1	0	1	0	0	1	0	0	1	1	1	1	7
hsa-miR-423-5p	MIMAT0004748	GREB1	9687	NM_014668	GREB1	1	0	1	0	0	1	0	0	1	1	1	1	7
hsa-miR-423-5p	MIMAT0004748	KIAA0355	9710	NM_014686	KIAA0355	1	0	1	0	0	1	0	0	1	1	1	1	7
hsa-miR-423-5p	MIMAT0004748	NOS1AP	9722	NM_001126060	NOS1AP	1	0	1	1	0	1	0	0	0	1	1	1	7
hsa-miR-423-5p	MIMAT0004748	SNPH	9751	NM_014723	SNPH	1	0	1	0	0	1	0	1	1	0	1	1	7
hsa-miR-423-5p	MIMAT0004748	KIAA0247	9766	NM_014734	KIAA0247	1	0	1	0	0	1	0	0	1	1	1	1	7
hsa-miR-423-5p	MIMAT0004748	KIAA0195	9772	NM_014738	KIAA0195	1	0	1	0	0	1	0	0	1	1	1	1	7
hsa-miR-423-5p	MIMAT0004748	ATG13	9776	NM_014741	ATG13	1	0	1	0	0	1	0	1	1	0	1	1	7
hsa-miR-423-5p	MIMAT0004748	MAML1	9794	NM_014757	MAML1	1	0	1	0	0	1	0	0	1	1	1	1	7
hsa-miR-423-5p	MIMAT0004748	SPOCK2	9806	NM_001244950	SPOCK2	1	0	1	0	1	1	0	0	0	1	1	1	7
hsa-miR-423-5p	MIMAT0004748	SPOCK2	9806	NM_014767	SPOCK2	1	0	1	0	1	1	0	0	1	0	1	1	7
hsa-miR-423-5p	MIMAT0004748	SPATA2	9825	NM_006038	SPATA2	1	0	1	0	1	1	0	0	1	0	1	1	7
hsa-miR-423-5p	MIMAT0004748	DDX46	9879	NM_014829	DDX46	0	0	1	0	1	1	0	0	1	1	1	1	7
hsa-miR-423-5p	MIMAT0004748	SV2B	9899	NM_014848	SV2B	1	0	1	0	0	1	0	0	1	1	1	1	7
hsa-miR-423-5p	MIMAT0004748	KLHL21	9903	NM_014851	KLHL21	1	0	1	0	0	1	0	0	1	1	1	1	7
hsa-miR-423-5p	MIMAT0004748	DGCR2	9993	NM_005137	DGCR2	1	0	1	0	0	1	0	0	1	1	1	1	7
hsa-miR-423-5p	MIMAT0004748	PDZK1IP1	10158	NM_005764	PDZK1IP1	1	0	1	0	0	1	0	0	1	1	1	1	7
hsa-miR-423-5p	MIMAT0004748	RBM5	10181	NM_005778	RBM5	1	0	1	0	0	1	0	0	1	1	1	1	7
hsa-miR-423-5p	MIMAT0004748	SPEG	10290	NM_005876	SPEG	1	0	1	0	0	1	0	0	1	1	1	1	7
hsa-miR-423-5p	MIMAT0004748	CORO2B	10391	NM_006091	CORO2B	1	0	1	0	1	1	0	0	1	0	1	1	7
hsa-miR-423-5p	MIMAT0004748	PGRMC2	10424	NM_006320	PGRMC2	1	0	1	0	1	1	0	0	0	1	1	1	7
hsa-miR-423-5p	MIMAT0004748	VAT1	10493	NM_006373	VAT1	1	0	1	0	0	1	0	0	1	1	1	1	7
hsa-miR-423-5p	MIMAT0004748	ATG7	10533	NM_006395	ATG7	1	0	1	0	0	1	0	0	1	1	1	1	7
hsa-miR-423-5p	MIMAT0004748	TXNIP	10628	NM_006472	TXNIP	1	0	1	0	0	1	0	0	1	1	1	1	7
hsa-miR-423-5p	MIMAT0004748	FAM114A2	10827	NM_018691	FAM114A2	1	0	1	0	1	1	0	0	1	0	1	1	7
hsa-miR-423-5p	MIMAT0004748	ACTL7A	10881	NM_006687	ACTL7A	1	0	1	0	0	1	0	0	1	1	1	1	7
hsa-miR-423-5p	MIMAT0004748	GPR83	10888	NM_016540	GPR83	1	0	1	0	0	1	0	0	1	1	1	1	7
hsa-miR-423-5p	MIMAT0004748	KDELR1	10945	NM_006801	KDELR1	1	0	1	0	0	1	0	0	1	1	1	1	7
hsa-miR-423-5p	MIMAT0004748	ADAP1	11033	NM_006869	ADAP1	1	0	1	0	0	1	0	0	1	1	1	1	7
hsa-miR-423-5p	MIMAT0004748	TPPP	11076	NM_007030	TPPP	1	0	1	0	0	1	0	0	1	1	1	1	7
hsa-miR-423-5p	MIMAT0004748	ADAMTS5	11096	NM_007038	ADAMTS5	1	0	1	0	0	1	0	0	1	1	1	1	7
hsa-miR-423-5p	MIMAT0004748	SOX21	11166	NM_007084	SOX21	1	0	1	0	0	1	0	0	1	1	1	1	7
hsa-miR-423-5p	MIMAT0004748	NISCH	11188	NM_007184	NISCH	1	0	1	0	0	1	0	0	1	1	1	1	7
hsa-miR-423-5p	MIMAT0004748	HRH3	11255	NM_007232	HRH3	1	0	1	0	0	1	0	0	1	1	1	1	7
hsa-miR-423-5p	MIMAT0004748	MRAS	22808	NM_001252093	MRAS	1	0	1	0	1	1	0	1	0	0	1	1	7
hsa-miR-423-5p	MIMAT0004748	MRAS	22808	NM_001252092	MRAS	1	0	1	0	1	1	0	1	0	0	1	1	7
hsa-miR-423-5p	MIMAT0004748	MRAS	22808	NM_001085049	MRAS	1	0	1	0	1	1	0	1	0	0	1	1	7
hsa-miR-423-5p	MIMAT0004748	MRAS	22808	NM_001252090	MRAS	1	0	1	0	1	1	0	1	0	0	1	1	7
hsa-miR-423-5p	MIMAT0004748	MRAS	22808	NM_001252091	MRAS	1	0	1	0	1	1	0	1	0	0	1	1	7
hsa-miR-423-5p	MIMAT0004748	SHANK2	22941	NM_012309	SHANK2	1	0	1	0	0	1	0	0	1	1	1	1	7
hsa-miR-423-5p	MIMAT0004748	PCNX	22990	NM_014982	PCNX	1	0	1	0	0	1	0	0	1	1	1	1	7
hsa-miR-423-5p	MIMAT0004748	FAIM2	23017	NM_012306	FAIM2	1	0	1	0	0	1	0	0	1	1	1	1	7
hsa-miR-423-5p	MIMAT0004748	SARM1	23098	NM_015077	SARM1	1	0	1	0	0	1	0	0	1	1	1	1	7
hsa-miR-423-5p	MIMAT0004748	HIC2	23119	NM_015094	HIC2	1	0	1	0	1	1	0	0	1	0	1	1	7
hsa-miR-423-5p	MIMAT0004748	ATP10B	23120	NM_025153	ATP10B	1	0	1	0	0	1	0	0	1	1	1	1	7
hsa-miR-423-5p	MIMAT0004748	RGL1	23179	NM_015149	RGL1	1	0	1	0	0	1	0	0	1	1	1	1	7
hsa-miR-423-5p	MIMAT0004748	CLEC16A	23274	NM_015226	CLEC16A	1	0	1	0	0	1	0	0	1	1	1	1	7
hsa-miR-423-5p	MIMAT0004748	POFUT2	23275	NM_015227	POFUT2	1	0	1	0	0	1	0	0	1	1	1	1	7
hsa-miR-423-5p	MIMAT0004748	SIN3B	23309	NM_015260	SIN3B	1	0	1	0	0	1	0	0	1	1	1	1	7
hsa-miR-423-5p	MIMAT0004748	USP22	23326	NM_015276	USP22	1	0	1	0	0	1	0	0	1	1	1	1	7
hsa-miR-423-5p	MIMAT0004748	LARS2	23395	NM_015340	LARS2	1	0	1	0	0	1	0	0	1	1	1	1	7
hsa-miR-423-5p	MIMAT0004748	PIP5K1C	23396	NM_012398	PIP5K1C	1	0	1	0	0	1	0	0	1	1	1	1	7
hsa-miR-423-5p	MIMAT0004748	NCS1	23413	NM_014286	NCS1	1	0	1	0	0	1	0	0	1	1	1	1	7
hsa-miR-423-5p	MIMAT0004748	TMED3	23423	NM_007364	TMED3	1	0	1	0	0	1	0	0	1	1	1	1	7
hsa-miR-423-5p	MIMAT0004748	PES1	23481	NM_014303	PES1	1	0	1	0	0	1	0	0	1	1	1	1	7
hsa-miR-423-5p	MIMAT0004748	KCTD2	23510	NM_015353	KCTD2	1	0	1	0	0	1	0	0	1	1	1	1	7
hsa-miR-423-5p	MIMAT0004748	KPNA6	23633	NM_012316	KPNA6	1	0	1	0	0	1	0	0	1	1	1	1	7
hsa-miR-423-5p	MIMAT0004748	PLA2G15	23659	NM_012320	PLA2G15	1	0	1	0	0	1	0	0	1	1	1	1	7
hsa-miR-423-5p	MIMAT0004748	TBC1D22A	25771	NM_014346	TBC1D22A	1	0	1	0	0	1	0	0	1	1	1	1	7
hsa-miR-423-5p	MIMAT0004748	TECPR1	25851	NM_015395	TECPR1	1	0	1	0	0	1	0	0	1	1	1	1	7
hsa-miR-423-5p	MIMAT0004748	BRMS1	25855	NM_015399	BRMS1	1	0	1	0	0	1	0	0	1	1	1	1	7
hsa-miR-423-5p	MIMAT0004748	PNKD	25953	NM_022572	PNKD	1	0	1	0	1	1	0	1	0	0	1	1	7
hsa-miR-423-5p	MIMAT0004748	CHD5	26038	NM_015557	CHD5	1	0	1	0	0	1	0	0	1	1	1	1	7
hsa-miR-423-5p	MIMAT0004748	ABHD12	26090	NM_001042472	ABHD12	1	0	1	0	0	1	0	0	1	1	1	1	7
hsa-miR-423-5p	MIMAT0004748	NAT9	26151	NM_015654	NAT9	1	0	1	0	0	1	0	0	1	1	1	1	7
hsa-miR-423-5p	MIMAT0004748	KLHL3	26249	NM_017415	KLHL3	1	0	1	0	1	1	0	0	1	0	1	1	7
hsa-miR-423-5p	MIMAT0004748	FBXO10	26267	NM_012166	FBXO10	1	0	1	0	0	1	0	0	1	1	1	1	7
hsa-miR-423-5p	MIMAT0004748	TIMM13	26517	NM_012458	TIMM13	1	0	1	0	0	1	0	0	1	1	1	1	7
hsa-miR-423-5p	MIMAT0004748	VENTX	27287	NM_014468	VENTX	1	0	1	0	0	1	0	0	1	1	1	1	7
hsa-miR-423-5p	MIMAT0004748	SGSM3	27352	NM_015705	SGSM3	1	0	1	0	0	1	0	0	1	1	1	1	7
hsa-miR-423-5p	MIMAT0004748	TMEM208	29100	NM_014187	TMEM208	1	0	1	0	0	1	0	0	1	1	1	1	7
hsa-miR-423-5p	MIMAT0004748	SAP30BP	29115	NM_013260	SAP30BP	1	0	1	0	0	1	0	0	1	1	1	1	7
hsa-miR-423-5p	MIMAT0004748	CYP2S1	29785	NM_030622	CYP2S1	1	0	1	0	0	1	0	0	1	1	1	1	7
hsa-miR-423-5p	MIMAT0004748	TFCP2L1	29842	NM_014553	TFCP2L1	1	0	1	0	0	1	0	0	1	1	1	1	7
hsa-miR-423-5p	MIMAT0004748	CDIP1	29965	NM_001199054	CDIP1	1	0	1	1	0	1	0	0	0	1	1	1	7
hsa-miR-423-5p	MIMAT0004748	SOX8	30812	NM_014587	SOX8	1	0	1	0	0	1	0	0	1	1	1	1	7
hsa-miR-423-5p	MIMAT0004748	KCNIP3	30818	NM_013434	KCNIP3	1	0	1	0	1	1	0	0	0	1	1	1	7
hsa-miR-423-5p	MIMAT0004748	CD209	30835	NM_021155	CD209	1	0	1	0	0	1	0	0	1	1	1	1	7
hsa-miR-423-5p	MIMAT0004748	TAX1BP3	30851	NM_014604	TAX1BP3	1	0	1	0	0	1	0	0	1	1	1	1	7
hsa-miR-423-5p	MIMAT0004748	SOST	50964	NM_025237	SOST	1	0	1	0	0	1	0	0	1	1	1	1	7
hsa-miR-423-5p	MIMAT0004748	CPA4	51200	NM_016352	CPA4	1	0	1	0	0	1	0	0	1	1	1	1	7
hsa-miR-423-5p	MIMAT0004748	THEM6	51337	NM_016647	THEM6	1	0	1	0	0	1	0	0	1	1	1	1	7
hsa-miR-423-5p	MIMAT0004748	RAB14	51552	NM_016322	RAB14	1	0	1	0	0	1	0	0	1	1	1	1	7
hsa-miR-423-5p	MIMAT0004748	KLF13	51621	NM_015995	KLF13	1	0	1	0	0	1	0	0	1	1	1	1	7
hsa-miR-423-5p	MIMAT0004748	ASB2	51676	NM_016150	ASB2	1	0	1	0	1	1	0	0	1	0	1	1	7
hsa-miR-423-5p	MIMAT0004748	SUFU	51684	NM_016169	SUFU	1	0	1	0	0	1	0	0	1	1	1	1	7
hsa-miR-423-5p	MIMAT0004748	TPCN1	53373	NM_001143819	TPCN1	1	0	1	0	1	1	0	0	0	1	1	1	7
hsa-miR-423-5p	MIMAT0004748	RIPPLY3	53820	NM_018962	RIPPLY3	1	0	1	0	0	1	0	0	1	1	1	1	7
hsa-miR-423-5p	MIMAT0004748	FXYD7	53822	NM_022006	FXYD7	1	0	1	0	0	1	0	0	1	1	1	1	7
hsa-miR-423-5p	MIMAT0004748	CSNK1G1	53944	NM_022048	CSNK1G1	1	0	1	0	0	1	0	0	1	1	1	1	7
hsa-miR-423-5p	MIMAT0004748	CHRAC1	54108	NM_017444	CHRAC1	1	0	1	0	0	1	0	0	1	1	1	1	7
hsa-miR-423-5p	MIMAT0004748	MTRF1L	54516	NM_019041	MTRF1L	1	0	1	0	0	1	0	0	1	1	1	1	7
hsa-miR-423-5p	MIMAT0004748	ROBO4	54538	NM_019055	ROBO4	0	0	1	1	0	1	0	0	1	1	1	1	7
hsa-miR-423-5p	MIMAT0004748	SGTB	54557	NM_019072	SGTB	1	0	1	1	0	1	0	0	1	0	1	1	7
hsa-miR-423-5p	MIMAT0004748	EPB41L4B	54566	NM_019114	EPB41L4B	1	0	1	0	0	1	0	0	1	1	1	1	7
hsa-miR-423-5p	MIMAT0004748	TBC1D13	54662	NM_018201	TBC1D13	1	0	1	0	0	1	0	0	1	1	1	1	7
hsa-miR-423-5p	MIMAT0004748	TMEM104	54868	NM_017728	TMEM104	1	0	1	0	0	1	0	0	1	1	1	1	7
hsa-miR-423-5p	MIMAT0004748	CASZ1	54897	NM_001079843	CASZ1	1	0	1	0	0	1	0	0	1	1	1	1	7
hsa-miR-423-5p	MIMAT0004748	ELOVL2	54898	NM_017770	ELOVL2	1	0	1	0	0	1	0	0	1	1	1	1	7
hsa-miR-423-5p	MIMAT0004748	WDYHV1	55093	NM_018024	WDYHV1	1	0	1	0	0	1	0	0	1	1	1	1	7
hsa-miR-423-5p	MIMAT0004748	SAMD4B	55095	NM_018028	SAMD4B	1	0	1	0	1	1	0	0	1	0	1	1	7
hsa-miR-423-5p	MIMAT0004748	LGI2	55203	NM_018176	LGI2	1	0	1	0	0	1	0	0	1	1	1	1	7
hsa-miR-423-5p	MIMAT0004748	TMEM144	55314	NM_018342	TMEM144	1	0	1	0	0	1	0	0	1	1	1	1	7
hsa-miR-423-5p	MIMAT0004748	SMPD3	55512	NM_018667	SMPD3	1	0	1	0	0	1	0	1	1	0	1	1	7
hsa-miR-423-5p	MIMAT0004748	FERMT1	55612	NM_017671	FERMT1	1	0	1	0	0	1	0	0	1	1	1	1	7
hsa-miR-423-5p	MIMAT0004748	TBC1D22B	55633	NM_017772	TBC1D22B	1	0	1	0	0	1	0	0	1	1	1	1	7
hsa-miR-423-5p	MIMAT0004748	SLC48A1	55652	NM_017842	SLC48A1	1	0	1	0	0	1	0	0	1	1	1	1	7
hsa-miR-423-5p	MIMAT0004748	RPRM	56475	NM_019845	RPRM	1	0	1	0	0	1	0	0	1	1	1	1	7
hsa-miR-423-5p	MIMAT0004748	JPH1	56704	NM_020647	JPH1	1	0	1	0	0	1	0	0	1	1	1	1	7
hsa-miR-423-5p	MIMAT0004748	CDC42SE1	56882	NM_020239	CDC42SE1	1	0	1	0	1	1	0	1	0	0	1	1	7
hsa-miR-423-5p	MIMAT0004748	DPYSL5	56896	NM_020134	DPYSL5	1	0	1	0	0	1	0	0	1	1	1	1	7
hsa-miR-423-5p	MIMAT0004748	SEMA3G	56920	NM_020163	SEMA3G	1	0	1	0	0	1	0	0	1	1	1	1	7
hsa-miR-423-5p	MIMAT0004748	PDXP	57026	NM_020315	PDXP	1	0	1	0	0	1	0	0	1	1	1	1	7
hsa-miR-423-5p	MIMAT0004748	ADCK1	57143	NM_020421	ADCK1	1	0	1	0	0	1	0	0	1	1	1	1	7
hsa-miR-423-5p	MIMAT0004748	SLC44A2	57153	NM_020428	SLC44A2	1	0	1	0	1	1	0	0	1	0	1	1	7
hsa-miR-423-5p	MIMAT0004748	ATP8B2	57198	NM_020452	ATP8B2	1	0	1	0	0	1	0	1	1	0	1	1	7
hsa-miR-423-5p	MIMAT0004748	JPH3	57338	NM_020655	JPH3	1	0	1	0	0	1	0	0	1	1	1	1	7
hsa-miR-423-5p	MIMAT0004748	REXO1	57455	NM_020695	REXO1	1	0	1	0	1	1	0	0	1	0	1	1	7
hsa-miR-423-5p	MIMAT0004748	PPM1H	57460	NM_020700	PPM1H	1	0	1	0	0	1	0	0	1	1	1	1	7
hsa-miR-423-5p	MIMAT0004748	STRIP2	57464	NM_020704	STRIP2	1	0	1	0	0	1	0	0	1	1	1	1	7
hsa-miR-423-5p	MIMAT0004748	LRRC47	57470	NM_020710	LRRC47	1	0	1	0	0	1	0	0	1	1	1	1	7
hsa-miR-423-5p	MIMAT0004748	PRR12	57479	NM_020719	PRR12	1	0	1	0	0	1	0	0	1	1	1	1	7
hsa-miR-423-5p	MIMAT0004748	ZNF608	57507	NM_020747	ZNF608	1	0	1	0	1	1	0	0	1	0	1	1	7
hsa-miR-423-5p	MIMAT0004748	RPTOR	57521	NM_020761	RPTOR	1	0	1	0	0	1	0	0	1	1	1	1	7
hsa-miR-423-5p	MIMAT0004748	ZNF319	57567	NM_020807	ZNF319	0	0	1	1	0	1	0	0	1	1	1	1	7
hsa-miR-423-5p	MIMAT0004748	KIF17	57576	NM_020816	KIF17	1	0	1	0	0	1	0	0	1	1	1	1	7
hsa-miR-423-5p	MIMAT0004748	EPG5	57724	NM_020964	EPG5	1	0	1	0	0	1	0	0	1	1	1	1	7
hsa-miR-423-5p	MIMAT0004748	CADM3	57863	NM_001127173	CADM3	1	0	1	0	1	1	0	1	0	0	1	1	7
hsa-miR-423-5p	MIMAT0004748	TP53INP2	58476	NM_021202	TP53INP2	1	0	1	0	0	1	0	0	1	1	1	1	7
hsa-miR-423-5p	MIMAT0004748	SCAF1	58506	NM_021228	SCAF1	1	0	1	0	1	1	0	0	1	0	1	1	7
hsa-miR-423-5p	MIMAT0004748	TMEM8A	58986	NM_021259	TMEM8A	1	0	1	0	0	1	0	0	1	1	1	1	7
hsa-miR-423-5p	MIMAT0004748	MESDC1	59274	NM_022566	MESDC1	1	0	1	0	0	1	0	0	1	1	1	1	7
hsa-miR-423-5p	MIMAT0004748	PRDM12	59335	NM_021619	PRDM12	1	0	1	0	0	1	0	0	1	1	1	1	7
hsa-miR-423-5p	MIMAT0004748	ALX4	60529	NM_021926	ALX4	1	0	1	0	0	1	0	0	1	1	1	1	7
hsa-miR-423-5p	MIMAT0004748	DMRTA2	63950	NM_032110	DMRTA2	1	0	1	0	0	1	0	0	1	1	1	1	7
hsa-miR-423-5p	MIMAT0004748	NEUROG2	63973	NM_024019	NEUROG2	1	0	1	0	0	1	0	0	1	1	1	1	7
hsa-miR-423-5p	MIMAT0004748	GOLPH3	64083	NM_022130	GOLPH3	0	0	1	0	0	1	0	1	1	1	1	1	7
hsa-miR-423-5p	MIMAT0004748	C10orf54	64115	NM_022153	C10orf54	1	0	1	0	0	1	0	0	1	1	1	1	7
hsa-miR-423-5p	MIMAT0004748	PDLIM2	64236	NM_176871	PDLIM2	1	0	1	0	0	1	0	0	1	1	1	1	7
hsa-miR-423-5p	MIMAT0004748	IKZF4	64375	NM_022465	IKZF4	1	0	1	0	0	1	0	0	1	1	1	1	7
hsa-miR-423-5p	MIMAT0004748	PYCRL	65263	NM_023078	PYCRL	1	0	1	0	0	1	0	0	1	1	1	1	7
hsa-miR-423-5p	MIMAT0004748	C17orf53	78995	NM_024032	C17orf53	1	0	1	0	0	1	0	0	1	1	1	1	7
hsa-miR-423-5p	MIMAT0004748	DDX54	79039	NM_024072	DDX54	1	0	1	0	1	1	0	0	1	0	1	1	7
hsa-miR-423-5p	MIMAT0004748	TMEM109	79073	NM_024092	TMEM109	1	0	1	0	0	1	0	0	1	1	1	1	7
hsa-miR-423-5p	MIMAT0004748	CCDC28B	79140	NM_024296	CCDC28B	1	0	1	0	0	1	0	0	1	1	1	1	7
hsa-miR-423-5p	MIMAT0004748	CENPO	79172	NM_001199803	CENPO	1	0	1	1	0	1	0	0	0	1	1	1	7
hsa-miR-423-5p	MIMAT0004748	EFHD2	79180	NM_024329	EFHD2	1	0	1	0	0	1	0	0	1	1	1	1	7
hsa-miR-423-5p	MIMAT0004748	MUL1	79594	NM_024544	MUL1	1	0	1	0	1	1	0	0	1	0	1	1	7
hsa-miR-423-5p	MIMAT0004748	LPCAT1	79888	NM_024830	LPCAT1	1	0	1	0	0	1	0	0	1	1	1	1	7
hsa-miR-423-5p	MIMAT0004748	ADM2	79924	NM_024866	ADM2	1	0	1	0	0	1	0	0	1	1	1	1	7
hsa-miR-423-5p	MIMAT0004748	MAP6D1	79929	NM_024871	MAP6D1	1	0	1	0	0	1	0	0	1	1	1	1	7
hsa-miR-423-5p	MIMAT0004748	ERMP1	79956	NM_024896	ERMP1	1	0	1	0	0	1	0	0	1	1	1	1	7
hsa-miR-423-5p	MIMAT0004748	NRSN2	80023	NM_024958	NRSN2	1	0	1	0	1	1	0	0	1	0	1	1	7
hsa-miR-423-5p	MIMAT0004748	DBF4B	80174	NM_145663	DBF4B	1	0	1	0	0	1	0	0	1	1	1	1	7
hsa-miR-423-5p	MIMAT0004748	SPSB1	80176	NM_025106	SPSB1	1	0	1	0	0	1	0	0	1	1	1	1	7
hsa-miR-423-5p	MIMAT0004748	DNAJC5	80331	NM_025219	DNAJC5	1	0	1	0	0	1	0	0	1	1	1	1	7
hsa-miR-423-5p	MIMAT0004748	PTDSS2	81490	NM_030783	PTDSS2	1	0	1	0	0	1	0	0	1	1	1	1	7
hsa-miR-423-5p	MIMAT0004748	WBSCR16	81554	NM_030798	WBSCR16	1	0	1	0	1	1	0	0	1	0	1	1	7
hsa-miR-423-5p	MIMAT0004748	SYDE2	84144	NM_032184	SYDE2	1	0	1	0	1	1	0	0	1	0	1	1	7
hsa-miR-423-5p	MIMAT0004748	CAMKK1	84254	NM_172207	CAMKK1	1	0	1	0	1	1	0	0	1	0	1	1	7
hsa-miR-423-5p	MIMAT0004748	CHCHD5	84269	NM_032309	CHCHD5	1	0	1	0	0	1	0	0	1	1	1	1	7
hsa-miR-423-5p	MIMAT0004748	PROK1	84432	NM_032414	PROK1	1	0	1	0	0	1	0	0	1	1	1	1	7
hsa-miR-423-5p	MIMAT0004748	MAP1LC3A	84557	NM_181509	MAP1LC3A	1	0	1	0	1	1	0	1	0	0	1	1	7
hsa-miR-423-5p	MIMAT0004748	MAP1LC3A	84557	NM_032514	MAP1LC3A	1	0	1	0	1	1	0	1	0	0	1	1	7
hsa-miR-423-5p	MIMAT0004748	GLYR1	84656	NM_032569	GLYR1	1	0	1	0	1	1	0	0	1	0	1	1	7
hsa-miR-423-5p	MIMAT0004748	CBX2	84733	NM_005189	CBX2	1	0	1	0	0	1	0	0	1	1	1	1	7
hsa-miR-423-5p	MIMAT0004748	UNC119B	84747	NM_001080533	UNC119B	1	0	1	0	0	1	0	0	1	1	1	1	7
hsa-miR-423-5p	MIMAT0004748	MPV17L2	84769	NM_032683	MPV17L2	1	0	1	0	0	1	0	0	1	1	1	1	7
hsa-miR-423-5p	MIMAT0004748	LMNB2	84823	NM_032737	LMNB2	1	0	1	0	0	1	0	0	1	1	1	1	7
hsa-miR-423-5p	MIMAT0004748	SPRYD3	84926	NM_032840	SPRYD3	1	0	1	0	0	1	0	0	1	1	1	1	7
hsa-miR-423-5p	MIMAT0004748	FAM207A	85395	NM_058190	FAM207A	1	0	1	0	0	1	0	0	1	1	1	1	7
hsa-miR-423-5p	MIMAT0004748	NAV1	89796	NM_020443	NAV1	1	0	1	0	0	1	0	1	1	0	1	1	7
hsa-miR-423-5p	MIMAT0004748	TSPAN18	90139	NM_130783	TSPAN18	1	0	1	0	1	1	0	0	1	0	1	1	7
hsa-miR-423-5p	MIMAT0004748	UNC5A	90249	NM_133369	UNC5A	1	0	1	0	0	1	0	0	1	1	1	1	7
hsa-miR-423-5p	MIMAT0004748	SPSB3	90864	XM_005255673	SPSB3	1	0	1	1	0	1	0	0	0	1	1	1	7
hsa-miR-423-5p	MIMAT0004748	TRIM41	90933	NM_033549	TRIM41	0	0	1	0	0	1	0	1	1	1	1	1	7
hsa-miR-423-5p	MIMAT0004748	CREB3L1	90993	NM_052854	CREB3L1	0	0	1	1	0	1	0	0	1	1	1	1	7
hsa-miR-423-5p	MIMAT0004748	RFT1	91869	NM_052859	RFT1	1	0	1	0	0	1	0	0	1	1	1	1	7
hsa-miR-423-5p	MIMAT0004748	SPSB4	92369	NM_080862	SPSB4	1	0	1	0	0	1	0	0	1	1	1	1	7
hsa-miR-423-5p	MIMAT0004748	ASB16	92591	NM_080863	ASB16	1	0	1	0	0	1	0	0	1	1	1	1	7
hsa-miR-423-5p	MIMAT0004748	B3GNT7	93010	NM_145236	B3GNT7	1	0	1	0	1	1	0	0	0	1	1	1	7
hsa-miR-423-5p	MIMAT0004748	PLCD3	113026	NM_133373	PLCD3	1	0	1	0	0	1	0	0	1	1	1	1	7
hsa-miR-423-5p	MIMAT0004748	CDCA5	113130	NM_080668	CDCA5	1	0	1	0	0	1	0	0	1	1	1	1	7
hsa-miR-423-5p	MIMAT0004748	CSMD2	114784	NM_052896	CSMD2	1	0	1	0	0	1	0	0	1	1	1	1	7
hsa-miR-423-5p	MIMAT0004748	C5orf55	116349	NM_138464	C5orf55	1	0	1	0	0	1	0	0	1	1	1	1	7
hsa-miR-423-5p	MIMAT0004748	ACAP3	116983	NM_030649	ACAP3	1	0	1	0	1	1	0	0	0	1	1	1	7
hsa-miR-423-5p	MIMAT0004748	AGAP3	116988	NM_001042535	AGAP3	1	0	1	0	0	1	0	1	1	0	1	1	7
hsa-miR-423-5p	MIMAT0004748	TADA1	117143	NM_053053	TADA1	0	0	1	0	1	1	0	0	1	1	1	1	7
hsa-miR-423-5p	MIMAT0004748	FOXN4	121643	NM_213596	FOXN4	1	0	1	0	0	1	0	0	1	1	1	1	7
hsa-miR-423-5p	MIMAT0004748	JDP2	122953	NM_130469	JDP2	1	0	1	0	0	1	0	0	1	1	1	1	7
hsa-miR-423-5p	MIMAT0004748	ZNF787	126208	NM_001002836	ZNF787	1	0	1	0	0	1	0	0	1	1	1	1	7
hsa-miR-423-5p	MIMAT0004748	MFSD12	126321	NM_174983	MFSD12	1	0	1	0	1	1	0	0	1	0	1	1	7
hsa-miR-423-5p	MIMAT0004748	LRRC25	126364	NM_145256	LRRC25	1	0	1	0	0	1	0	0	1	1	1	1	7
hsa-miR-423-5p	MIMAT0004748	FBXO27	126433	NM_178820	FBXO27	1	0	1	0	0	1	0	0	1	1	1	1	7
hsa-miR-423-5p	MIMAT0004748	B3GALT6	126792	NM_080605	B3GALT6	1	0	1	0	0	1	0	0	1	1	1	1	7
hsa-miR-423-5p	MIMAT0004748	IQGAP3	128239	NM_178229	IQGAP3	1	0	1	0	0	1	0	0	1	1	1	1	7
hsa-miR-423-5p	MIMAT0004748	GAB4	128954	NM_001037814	GAB4	1	0	1	0	0	1	0	0	1	1	1	1	7
hsa-miR-423-5p	MIMAT0004748	C22orf39	128977	NM_173793	C22orf39	1	0	1	0	0	1	0	0	1	1	1	1	7
hsa-miR-423-5p	MIMAT0004748	BBS5	129880	NM_152384	BBS5	1	0	1	0	0	1	0	0	1	1	1	1	7
hsa-miR-423-5p	MIMAT0004748	LRRC15	131578	NM_130830	LRRC15	1	0	1	0	1	1	0	0	1	0	1	1	7
hsa-miR-423-5p	MIMAT0004748	ENPP6	133121	NM_153343	ENPP6	1	0	1	0	0	1	0	0	1	1	1	1	7
hsa-miR-423-5p	MIMAT0004748	PPARGC1B	133522	NM_133263	PPARGC1B	1	0	1	0	0	1	0	0	1	1	1	1	7
hsa-miR-423-5p	MIMAT0004748	CLDN23	137075	NM_194284	CLDN23	1	0	1	0	0	1	0	0	1	1	1	1	7
hsa-miR-423-5p	MIMAT0004748	TMEM68	137695	NM_152417	TMEM68	1	0	1	0	1	1	0	0	1	0	1	1	7
hsa-miR-423-5p	MIMAT0004748	KRT72	140807	NM_080747	KRT72	1	0	1	0	0	1	0	0	1	1	1	1	7
hsa-miR-423-5p	MIMAT0004748	STK35	140901	NM_080836	STK35	1	0	1	0	0	1	0	0	1	1	1	1	7
hsa-miR-423-5p	MIMAT0004748	FAM101A	144347	NM_181709	FAM101A	1	0	1	0	0	1	0	0	1	1	1	1	7
hsa-miR-423-5p	MIMAT0004748	WIPF2	147179	NM_133264	WIPF2	1	0	1	0	1	1	0	0	1	0	1	1	7
hsa-miR-423-5p	MIMAT0004748	C19orf25	148223	NM_152482	C19orf25	1	0	1	0	0	1	0	0	1	1	1	1	7
hsa-miR-423-5p	MIMAT0004748	ZNF362	149076	NM_152493	ZNF362	1	0	1	0	1	1	0	0	1	0	1	1	7
hsa-miR-423-5p	MIMAT0004748	CLDN19	149461	NM_001123395	CLDN19	1	0	1	1	0	1	0	0	0	1	1	1	7
hsa-miR-423-5p	MIMAT0004748	SIK1	150094	NM_173354	SIK1	1	0	1	0	0	1	0	0	1	1	1	1	7
hsa-miR-423-5p	MIMAT0004748	METTL21A	151194	NM_001127395	METTL21A	1	0	1	0	1	1	0	0	0	1	1	1	7
hsa-miR-423-5p	MIMAT0004748	FAM84A	151354	NM_145175	FAM84A	1	0	1	0	0	1	0	0	1	1	1	1	7
hsa-miR-423-5p	MIMAT0004748	DTX3L	151636	NM_138287	DTX3L	1	0	1	0	0	1	0	0	1	1	1	1	7
hsa-miR-423-5p	MIMAT0004748	RNF38	152006	NM_194328	RNF38	1	0	1	0	1	1	0	0	0	1	1	1	7
hsa-miR-423-5p	MIMAT0004748	TMEM229B	161145	NM_182526	TMEM229B	1	0	1	0	0	1	0	1	1	0	1	1	7
hsa-miR-423-5p	MIMAT0004748	ODF3L1	161753	NM_175881	ODF3L1	1	0	1	0	0	1	0	0	1	1	1	1	7
hsa-miR-423-5p	MIMAT0004748	ITPRIPL2	162073	NM_001034841	ITPRIPL2	1	0	1	0	0	1	0	0	1	1	1	1	7
hsa-miR-423-5p	MIMAT0004748	LONRF2	164832	NM_198461	LONRF2	1	0	1	0	0	1	0	0	1	1	1	1	7
hsa-miR-423-5p	MIMAT0004748	OLFML2A	169611	NM_182487	OLFML2A	1	0	1	0	0	1	0	0	1	1	1	1	7
hsa-miR-423-5p	MIMAT0004748	QSOX2	169714	NM_181701	QSOX2	1	0	1	0	0	1	0	0	1	1	1	1	7
hsa-miR-423-5p	MIMAT0004748	POLR3H	171568	NM_001018050	POLR3H	1	0	1	1	0	1	0	0	0	1	1	1	7
hsa-miR-423-5p	MIMAT0004748	TMEM201	199953	NM_001010866	TMEM201	1	0	1	0	0	1	0	0	1	1	1	1	7
hsa-miR-423-5p	MIMAT0004748	CC2D1B	200014	NM_032449	CC2D1B	1	0	1	0	0	1	0	0	1	1	1	1	7
hsa-miR-423-5p	MIMAT0004748	IBA57	200205	NM_001010867	IBA57	1	0	1	0	0	1	0	0	1	1	1	1	7
hsa-miR-423-5p	MIMAT0004748	TRIM65	201292	NM_173547	TRIM65	1	0	1	0	0	1	0	0	1	1	1	1	7
hsa-miR-423-5p	MIMAT0004748	FAM219A	203259	NM_147202	FAM219A	1	0	1	0	1	1	0	0	1	0	1	1	7
hsa-miR-423-5p	MIMAT0004748	ANKS6	203286	NM_173551	ANKS6	1	0	1	0	0	1	0	0	1	1	1	1	7
hsa-miR-423-5p	MIMAT0004748	FAM124A	220108	NM_145019	FAM124A	1	0	1	0	0	1	0	0	1	1	1	1	7
hsa-miR-423-5p	MIMAT0004748	C6orf223	221416	NM_153246	C6orf223	1	0	1	0	1	1	0	0	1	0	1	1	7
hsa-miR-423-5p	MIMAT0004748	SDK1	221935	NM_152744	SDK1	1	0	1	0	0	1	0	0	1	1	1	1	7
hsa-miR-423-5p	MIMAT0004748	FOXK1	221937	NM_001037165	FOXK1	1	0	1	0	0	1	0	0	1	1	1	1	7
hsa-miR-423-5p	MIMAT0004748	C7orf41	222166	NM_152793	C7orf41	1	0	1	0	0	1	0	0	1	1	1	1	7
hsa-miR-423-5p	MIMAT0004748	IL27	246778	NM_145659	IL27	1	0	1	0	0	1	0	0	1	1	1	1	7
hsa-miR-423-5p	MIMAT0004748	MSRB3	253827	NM_001193460	MSRB3	0	0	1	1	1	1	0	0	0	1	1	1	7
hsa-miR-423-5p	MIMAT0004748	UTS2B	257313	NM_198152	UTS2B	0	0	1	1	0	1	0	0	1	1	1	1	7
hsa-miR-423-5p	MIMAT0004748	HSPA12A	259217	NM_025015	HSPA12A	1	0	1	0	1	1	0	0	1	0	1	1	7
hsa-miR-423-5p	MIMAT0004748	MDGA1	266727	NM_153487	MDGA1	1	0	1	0	0	1	0	0	1	1	1	1	7
hsa-miR-423-5p	MIMAT0004748	KCTD21	283219	NM_001029859	KCTD21	1	0	1	0	1	1	0	0	1	0	1	1	7
hsa-miR-423-5p	MIMAT0004748	KSR2	283455	NM_173598	KSR2	1	0	1	0	0	1	0	0	1	1	1	1	7
hsa-miR-423-5p	MIMAT0004748	FAM169B	283777	NM_182562	FAM169B	1	0	1	0	0	1	0	0	1	1	1	1	7
hsa-miR-423-5p	MIMAT0004748	PGP	283871	NM_001042371	PGP	1	0	1	0	0	1	0	0	1	1	1	1	7
hsa-miR-423-5p	MIMAT0004748	TCAIM	285343	NM_173826	TCAIM	1	0	1	0	0	1	0	0	1	1	1	1	7
hsa-miR-423-5p	MIMAT0004748	SH3PXD2B	285590	NM_001017995	SH3PXD2B	1	0	1	0	0	1	0	0	1	1	1	1	7
hsa-miR-423-5p	MIMAT0004748	RELL2	285613	NM_173828	RELL2	1	0	1	0	0	1	0	1	1	0	1	1	7
hsa-miR-423-5p	MIMAT0004748	ZFP41	286128	NM_173832	ZFP41	1	0	1	0	0	1	0	0	1	1	1	1	7
hsa-miR-423-5p	MIMAT0004748	GPIHBP1	338328	NM_178172	GPIHBP1	1	0	1	0	0	1	0	0	1	1	1	1	7
hsa-miR-423-5p	MIMAT0004748	TFAP2E	339488	NM_178548	TFAP2E	1	0	1	0	0	1	0	0	1	1	1	1	7
hsa-miR-423-5p	MIMAT0004748	MYLK4	340156	NM_001012418	MYLK4	1	0	1	0	0	1	0	0	1	1	1	1	7
hsa-miR-423-5p	MIMAT0004748	KIF24	347240	NM_194313	KIF24	1	0	1	0	0	1	0	0	1	1	1	1	7
hsa-miR-423-5p	MIMAT0004748	PDDC1	347862	NM_182612	PDDC1	1	0	1	0	0	1	0	0	1	1	1	1	7
hsa-miR-423-5p	MIMAT0004748	RBPMS2	348093	NM_194272	RBPMS2	1	0	1	0	0	1	0	0	1	1	1	1	7
hsa-miR-423-5p	MIMAT0004748	ATP9B	374868	NM_198531	ATP9B	1	0	1	0	0	1	0	0	1	1	1	1	7
hsa-miR-423-5p	MIMAT0004748	C1orf95	375057	NM_001003665	C1orf95	1	0	1	0	0	1	0	0	1	1	1	1	7
hsa-miR-423-5p	MIMAT0004748	KLHL30	377007	NM_198582	KLHL30	1	0	1	0	0	1	0	0	1	1	1	1	7
hsa-miR-423-5p	MIMAT0004748	IFITM5	387733	NM_001025295	IFITM5	1	0	1	0	0	1	0	0	1	1	1	1	7
hsa-miR-423-5p	MIMAT0004748	FOXI2	399823	NM_207426	FOXI2	1	0	1	0	0	1	0	0	1	1	1	1	7
hsa-miR-423-5p	MIMAT0004748	C15orf53	400359	NM_207444	C15orf53	1	0	1	0	0	1	0	0	1	1	1	1	7
hsa-miR-423-5p	MIMAT0004748	C3orf72	401089	NM_001040061	C3orf72	1	0	1	0	0	1	0	0	1	1	1	1	7
hsa-miR-423-5p	MIMAT0004748	C9orf139	401563	NM_207511	C9orf139	1	0	1	0	0	1	0	0	1	1	1	1	7
hsa-miR-423-5p	MIMAT0004748	ERVFRD-1	405754	NM_207582	ERVFRD-1	1	0	1	0	0	1	0	0	1	1	1	1	7
hsa-miR-423-5p	MIMAT0004748	C10orf55	414236	NM_001001791	C10orf55	1	0	1	0	0	1	0	0	1	1	1	1	7
hsa-miR-423-5p	MIMAT0004748	TSPAN11	441631	NM_001080509	TSPAN11	1	0	1	0	1	1	0	0	1	0	1	1	7
hsa-miR-423-5p	MIMAT0004748	CYB5RL	606495	NM_001031672	CYB5RL	1	0	1	0	0	1	0	0	1	1	1	1	7
hsa-miR-423-5p	MIMAT0004748	PSAPL1	768239	NM_001085382	PSAPL1	1	0	1	0	0	1	0	0	1	1	1	1	7
hsa-miR-423-5p	MIMAT0004748	SIGLEC14	100049587	NM_001098612	SIGLEC14	1	0	1	0	0	1	0	0	1	1	1	1	7
hsa-miR-423-5p	MIMAT0004748	ARL4D	379	NM_001661	ARL4D	1	0	0	1	0	1	0	0	1	1	1	1	7
hsa-miR-423-5p	MIMAT0004748	IGFBP5	3488	NM_000599	IGFBP5	1	0	0	1	0	1	0	0	1	1	1	1	7
hsa-miR-423-5p	MIMAT0004748	PLEKHG4	25894	NM_015432	PLEKHG4	1	0	0	1	0	1	0	0	1	1	1	1	7
hsa-miR-423-5p	MIMAT0004748	TMEM43	79188	NM_024334	TMEM43	1	0	0	1	0	1	0	0	1	1	1	1	7
hsa-miR-423-5p	MIMAT0004748	ARMC7	79637	NM_024585	ARMC7	1	0	0	1	0	1	0	0	1	1	1	1	7
hsa-miR-423-5p	MIMAT0004748	DCAKD	79877	NM_024819	DCAKD	1	0	0	1	0	1	0	0	1	1	1	1	7
hsa-miR-423-5p	MIMAT0004748	GRIN3A	116443	NM_133445	GRIN3A	1	0	0	1	0	1	0	0	1	1	1	1	7
hsa-miR-423-5p	MIMAT0004748	FAM84B	157638	NM_174911	FAM84B	1	0	0	1	0	1	0	0	1	1	1	1	7
hsa-miR-423-5p	MIMAT0004748	TAB3	257397	NM_152787	TAB3	1	0	0	1	0	1	0	0	1	1	1	1	7
hsa-miR-423-5p	MIMAT0004748	CA13	377677	NM_198584	CA13	1	0	0	1	0	1	0	0	1	1	1	1	7
hsa-miR-423-5p	MIMAT0004748	ADAR	103	NM_001193495	ADAR	0	1	1	0	0	1	0	0	0	1	1	1	6
hsa-miR-423-5p	MIMAT0004748	ADRA2B	151	NM_000682	ADRA2B	1	1	0	0	0	1	0	0	1	1	1	0	6
hsa-miR-423-5p	MIMAT0004748	AP2A1	160	NM_014203	AP2A1	1	1	1	0	0	1	0	0	0	0	1	1	6
hsa-miR-423-5p	MIMAT0004748	AP2B1	163	XM_005257940	AP2B1	1	1	0	0	0	1	0	0	0	1	1	1	6
hsa-miR-423-5p	MIMAT0004748	ALAD	210	XM_005251799	ALAD	1	1	1	0	0	1	0	0	0	0	1	1	6
hsa-miR-423-5p	MIMAT0004748	ALPI	248	NM_001631	ALPI	1	1	0	0	0	1	0	0	1	0	1	1	6
hsa-miR-423-5p	MIMAT0004748	AMPD2	271	NM_001257360	AMPD2	0	1	1	0	0	1	0	0	0	1	1	1	6
hsa-miR-423-5p	MIMAT0004748	AR	367	NM_000044	AR	1	1	0	0	0	1	0	0	0	1	1	1	6
hsa-miR-423-5p	MIMAT0004748	ARF1	375	NM_001024227	ARF1	0	1	1	0	0	1	0	0	0	1	1	1	6
hsa-miR-423-5p	MIMAT0004748	ARHGAP4	393	XM_005274670	ARHGAP4	1	1	1	0	0	1	0	0	0	0	1	1	6
hsa-miR-423-5p	MIMAT0004748	ARHGAP4	393	XM_005277844	ARHGAP4	1	1	1	0	0	1	0	0	0	0	1	1	6
hsa-miR-423-5p	MIMAT0004748	ARHGDIA	396	NM_001185077	ARHGDIA	1	1	1	0	0	1	0	0	0	0	1	1	6
hsa-miR-423-5p	MIMAT0004748	ATP5B	506	NM_001686	ATP5B	1	1	0	0	0	1	0	0	1	0	1	1	6
hsa-miR-423-5p	MIMAT0004748	KIF1A	547	NM_001244008	KIF1A	0	1	1	0	0	1	0	0	0	1	1	1	6
hsa-miR-423-5p	MIMAT0004748	BAG1	573	NM_004323	BAG1	1	1	0	0	0	1	0	0	1	0	1	1	6
hsa-miR-423-5p	MIMAT0004748	PRDM1	639	XM_005267094	PRDM1	1	1	0	0	0	1	0	0	0	1	1	1	6
hsa-miR-423-5p	MIMAT0004748	BNC1	646	XM_005272447	BNC1	1	1	0	0	0	1	0	0	0	1	1	1	6
hsa-miR-423-5p	MIMAT0004748	BMP8B	656	NM_001720	BMP8B	1	1	1	0	0	0	0	0	1	0	1	1	6
hsa-miR-423-5p	MIMAT0004748	BMPR2	659	NM_001204	BMPR2	1	1	0	0	0	1	0	0	1	1	1	0	6
hsa-miR-423-5p	MIMAT0004748	CALM1	801	XM_005268091	CALM1	1	1	0	0	0	1	0	0	0	1	1	1	6
hsa-miR-423-5p	MIMAT0004748	CAPNS1	826	XM_005259296	CAPNS1	1	1	0	0	0	1	0	0	0	1	1	1	6
hsa-miR-423-5p	MIMAT0004748	CASQ1	844	NM_001231	CASQ1	1	1	0	0	0	1	0	0	1	0	1	1	6
hsa-miR-423-5p	MIMAT0004748	CAV1	857	NM_001172895	CAV1	0	1	1	0	0	1	0	0	0	1	1	1	6
hsa-miR-423-5p	MIMAT0004748	CCND2	894	NM_001759	CCND2	1	1	0	0	0	1	0	0	1	1	1	0	6
hsa-miR-423-5p	MIMAT0004748	SCARB1	949	NM_005505	SCARB1	1	1	0	0	0	1	0	0	0	1	1	1	6
hsa-miR-423-5p	MIMAT0004748	CD74	972	NM_001025159	CD74	0	1	1	0	0	1	0	0	0	1	1	1	6
hsa-miR-423-5p	MIMAT0004748	CDC42	998	NM_001039802	CDC42	0	1	1	0	0	1	0	1	0	0	1	1	6
hsa-miR-423-5p	MIMAT0004748	CHD2	1106	XM_005254836	CHD2	1	1	0	0	0	1	0	0	0	1	1	1	6
hsa-miR-423-5p	MIMAT0004748	AP2M1	1173	XM_005247097	AP2M1	1	1	1	0	0	1	0	0	0	0	1	1	6
hsa-miR-423-5p	MIMAT0004748	CLK2	1196	NM_003993	CLK2	1	1	0	0	0	1	0	0	1	0	1	1	6
hsa-miR-423-5p	MIMAT0004748	COL4A4	1286	NM_000092	COL4A4	1	1	0	0	0	1	0	0	1	1	1	0	6
hsa-miR-423-5p	MIMAT0004748	COL8A2	1296	XM_005270477	COL8A2	0	1	1	0	0	1	0	0	0	1	1	1	6
hsa-miR-423-5p	MIMAT0004748	COL12A1	1303	NM_004370	COL12A1	1	1	0	0	0	1	0	0	0	1	1	1	6
hsa-miR-423-5p	MIMAT0004748	CRHR1	1394	NM_001256299	CRHR1	1	1	0	0	0	1	0	0	0	1	1	1	6
hsa-miR-423-5p	MIMAT0004748	CSK	1445	NM_004383	CSK	0	1	1	0	0	1	0	0	1	0	1	1	6
hsa-miR-423-5p	MIMAT0004748	CSNK1A1	1452	XM_005268376	CSNK1A1	0	1	1	0	0	1	0	0	0	1	1	1	6
hsa-miR-423-5p	MIMAT0004748	NKX2-5	1482	NM_001166175	NKX2-5	1	1	0	0	0	1	0	0	0	1	1	1	6
hsa-miR-423-5p	MIMAT0004748	CYLD	1540	XM_005255811	CYLD	0	1	1	0	0	1	0	0	0	1	1	1	6
hsa-miR-423-5p	MIMAT0004748	DDB2	1643	NM_000107	DDB2	0	1	1	0	0	1	0	0	1	0	1	1	6
hsa-miR-423-5p	MIMAT0004748	DDX6	1656	NM_004397	DDX6	0	1	1	0	0	0	0	1	1	0	1	1	6
hsa-miR-423-5p	MIMAT0004748	DLG1	1739	XM_005269289	DLG1	1	1	0	0	0	1	0	0	0	1	1	1	6
hsa-miR-423-5p	MIMAT0004748	DPP6	1804	NM_001039350	DPP6	0	1	1	0	0	1	0	0	0	1	1	1	6
hsa-miR-423-5p	MIMAT0004748	DRD5	1816	NM_000798	DRD5	0	1	0	1	0	1	0	0	1	0	1	1	6
hsa-miR-423-5p	MIMAT0004748	DTNB	1838	NM_021907	DTNB	1	1	0	0	0	1	0	0	0	1	1	1	6
hsa-miR-423-5p	MIMAT0004748	ECE1	1889	NM_001113347	ECE1	1	1	0	0	0	1	0	0	0	1	1	1	6
hsa-miR-423-5p	MIMAT0004748	EFNA2	1943	NM_001405	EFNA2	1	1	1	0	0	1	0	0	0	0	1	1	6
hsa-miR-423-5p	MIMAT0004748	EIF4B	1975	XM_005268709	EIF4B	0	1	1	0	0	1	0	0	0	1	1	1	6
hsa-miR-423-5p	MIMAT0004748	ELF3	1999	NM_001114309	ELF3	0	1	1	0	0	1	0	0	0	1	1	1	6
hsa-miR-423-5p	MIMAT0004748	EPB41L1	2036	XM_005260318	EPB41L1	1	1	0	0	0	1	0	0	0	1	1	1	6
hsa-miR-423-5p	MIMAT0004748	FAP	2191	NM_004460	FAP	1	1	0	0	0	1	0	0	1	0	1	1	6
hsa-miR-423-5p	MIMAT0004748	FKTN	2218	NM_001079802	FKTN	1	1	0	0	0	1	0	0	0	1	1	1	6
hsa-miR-423-5p	MIMAT0004748	FGF5	2250	NM_004464	FGF5	1	1	0	0	0	1	0	0	0	1	1	1	6
hsa-miR-423-5p	MIMAT0004748	FHL1	2273	NM_001159704	FHL1	1	1	0	0	0	1	0	0	0	1	1	1	6
hsa-miR-423-5p	MIMAT0004748	FKBP4	2288	NM_002014	FKBP4	1	1	1	0	0	0	0	0	1	0	1	1	6
hsa-miR-423-5p	MIMAT0004748	FOXD1	2297	NM_004472	FOXD1	0	1	1	0	0	1	0	0	1	0	1	1	6
hsa-miR-423-5p	MIMAT0004748	FOSL2	2355	NM_005253	FOSL2	1	1	1	0	0	0	0	0	1	0	1	1	6
hsa-miR-423-5p	MIMAT0004748	NR5A2	2494	XM_005245061	NR5A2	0	1	1	0	0	1	0	0	0	1	1	1	6
hsa-miR-423-5p	MIMAT0004748	GALNS	2588	XM_005256301	GALNS	1	1	1	0	0	0	0	0	0	1	1	1	6
hsa-miR-423-5p	MIMAT0004748	GATA4	2626	XM_005272386	GATA4	1	1	0	0	0	1	0	0	0	1	1	1	6
hsa-miR-423-5p	MIMAT0004748	GLUL	2752	NM_002065	GLUL	0	1	1	0	0	1	0	0	0	1	1	1	6
hsa-miR-423-5p	MIMAT0004748	GNAT1	2779	NM_144499	GNAT1	1	1	1	0	0	0	0	0	1	0	1	1	6
hsa-miR-423-5p	MIMAT0004748	GPR12	2835	NM_005288	GPR12	0	1	1	0	0	1	0	0	0	1	1	1	6
hsa-miR-423-5p	MIMAT0004748	GRK6	2870	NM_002082	GRK6	1	1	0	0	0	1	0	0	0	1	1	1	6
hsa-miR-423-5p	MIMAT0004748	GPX1	2876	NM_201397	GPX1	0	1	1	0	0	1	0	0	1	0	1	1	6
hsa-miR-423-5p	MIMAT0004748	GRIK5	2901	XM_005258821	GRIK5	0	1	1	0	0	1	0	0	0	1	1	1	6
hsa-miR-423-5p	MIMAT0004748	GSTZ1	2954	NM_001513	GSTZ1	1	1	0	0	0	1	0	0	0	1	1	1	6
hsa-miR-423-5p	MIMAT0004748	HABP2	3026	NM_004132	HABP2	1	1	0	0	0	1	0	0	1	1	1	0	6
hsa-miR-423-5p	MIMAT0004748	HCRTR1	3061	XM_005270789	HCRTR1	1	1	0	0	0	1	0	0	0	1	1	1	6
hsa-miR-423-5p	MIMAT0004748	HDAC1	3065	XM_005270791	HDAC1	1	1	0	0	0	1	0	0	0	1	1	1	6
hsa-miR-423-5p	MIMAT0004748	HDC	3067	NM_002112	HDC	1	1	0	0	0	1	0	0	1	0	1	1	6
hsa-miR-423-5p	MIMAT0004748	HLA-DQA1	3117	XM_005249049	HLA-DQA1	1	1	0	0	0	1	0	0	0	1	1	1	6
hsa-miR-423-5p	MIMAT0004748	HLF	3131	NM_002126	HLF	1	1	0	0	0	1	0	0	1	1	1	0	6
hsa-miR-423-5p	MIMAT0004748	HLCS	3141	NM_001242784	HLCS	1	1	0	0	0	1	0	0	0	1	1	1	6
hsa-miR-423-5p	MIMAT0004748	SLC29A2	3177	XM_005273964	SLC29A2	0	1	1	0	0	1	0	0	0	1	1	1	6
hsa-miR-423-5p	MIMAT0004748	HNRNPU	3192	NM_031844	HNRNPU	1	1	0	0	0	1	0	0	0	1	1	1	6
hsa-miR-423-5p	MIMAT0004748	HPCAL1	3241	XM_005246163	HPCAL1	1	1	1	0	0	1	0	0	0	0	1	1	6
hsa-miR-423-5p	MIMAT0004748	HSPA1L	3305	XM_005249070	HSPA1L	1	1	1	0	0	1	0	0	0	0	1	1	6
hsa-miR-423-5p	MIMAT0004748	IL9R	3581	NM_176786	IL9R	1	1	0	0	0	1	0	0	0	1	1	1	6
hsa-miR-423-5p	MIMAT0004748	ITPKB	3707	NM_002221	ITPKB	1	1	0	0	0	1	0	0	1	1	1	0	6
hsa-miR-423-5p	MIMAT0004748	JUND	3727	NM_005354	JUND	1	1	0	0	0	1	0	0	1	1	1	0	6
hsa-miR-423-5p	MIMAT0004748	KIF5A	3798	XM_005268858	KIF5A	1	1	0	0	0	1	0	0	0	1	1	1	6
hsa-miR-423-5p	MIMAT0004748	KRT4	3851	NM_002272	KRT4	1	1	0	0	0	1	0	0	1	1	1	0	6
hsa-miR-423-5p	MIMAT0004748	LEP	3952	XM_005250340	LEP	1	1	0	0	0	1	0	0	0	1	1	1	6
hsa-miR-423-5p	MIMAT0004748	LTBR	4055	NM_002342	LTBR	0	1	1	0	0	1	0	0	1	0	1	1	6
hsa-miR-423-5p	MIMAT0004748	SMAD3	4088	XM_005254383	SMAD3	1	1	0	0	0	1	0	0	0	1	1	1	6
hsa-miR-423-5p	MIMAT0004748	MAPT	4137	NM_001123066	MAPT	1	1	0	0	0	1	0	0	0	1	1	1	6
hsa-miR-423-5p	MIMAT0004748	RAB8A	4218	NM_005370	RAB8A	1	1	1	0	0	0	0	0	1	0	1	1	6
hsa-miR-423-5p	MIMAT0004748	MFAP2	4237	NM_002403	MFAP2	1	1	1	0	0	1	0	0	0	0	1	1	6
hsa-miR-423-5p	MIMAT0004748	MKLN1	4289	NM_001145354	MKLN1	1	1	0	0	0	1	0	0	0	1	1	1	6
hsa-miR-423-5p	MIMAT0004748	MAP3K9	4293	NM_033141	MAP3K9	1	1	1	0	0	0	0	0	1	0	1	1	6
hsa-miR-423-5p	MIMAT0004748	MLN	4295	NM_002418	MLN	1	1	1	0	0	1	0	0	0	0	1	1	6
hsa-miR-423-5p	MIMAT0004748	AFF1	4299	XM_005263009	AFF1	1	1	0	0	0	1	0	0	0	1	1	1	6
hsa-miR-423-5p	MIMAT0004748	AFF1	4299	XM_005263010	AFF1	1	1	0	0	0	1	0	0	0	1	1	1	6
hsa-miR-423-5p	MIMAT0004748	MOV10	4343	XM_005270871	MOV10	1	1	1	0	0	1	0	0	0	0	1	1	6
hsa-miR-423-5p	MIMAT0004748	MYO9A	4649	XM_005254404	MYO9A	1	1	0	0	0	1	0	0	0	1	1	1	6
hsa-miR-423-5p	MIMAT0004748	PPP1R12B	4660	XM_005245201	PPP1R12B	1	1	0	0	0	1	0	0	0	1	1	1	6
hsa-miR-423-5p	MIMAT0004748	NBN	4683	NM_002485	NBN	1	1	0	0	0	1	0	0	0	1	1	1	6
hsa-miR-423-5p	MIMAT0004748	NPR3	4883	NM_001204375	NPR3	1	1	1	0	0	1	0	0	0	0	1	1	6
hsa-miR-423-5p	MIMAT0004748	OSBP	5007	NM_002556	OSBP	1	1	0	0	0	1	0	0	1	1	1	0	6
hsa-miR-423-5p	MIMAT0004748	OTX1	5013	NM_014562	OTX1	1	1	0	0	0	1	0	0	1	0	1	1	6
hsa-miR-423-5p	MIMAT0004748	FURIN	5045	XM_005254932	FURIN	1	1	0	0	0	1	0	0	0	1	1	1	6
hsa-miR-423-5p	MIMAT0004748	PAK3	5063	XM_005262131	PAK3	1	1	0	0	0	1	0	0	0	1	1	1	6
hsa-miR-423-5p	MIMAT0004748	PFKL	5211	XM_005261135	PFKL	1	1	1	0	0	1	0	0	0	0	1	1	6
hsa-miR-423-5p	MIMAT0004748	PFN2	5217	NM_053024	PFN2	1	1	0	0	0	1	0	0	1	1	1	0	6
hsa-miR-423-5p	MIMAT0004748	PKLR	5313	XM_005245266	PKLR	1	1	1	0	0	1	0	0	0	0	1	1	6
hsa-miR-423-5p	MIMAT0004748	PLCB3	5331	NM_000932	PLCB3	1	1	1	0	0	1	0	0	0	0	1	1	6
hsa-miR-423-5p	MIMAT0004748	PLEC	5339	NM_201380	PLEC	1	1	1	0	0	1	0	0	0	0	1	1	6
hsa-miR-423-5p	MIMAT0004748	PMM1	5372	XM_005261641	PMM1	1	1	1	0	0	1	0	0	0	0	1	1	6
hsa-miR-423-5p	MIMAT0004748	2018-09-04	5414	NM_080415	2018-09-04	1	1	1	0	0	1	0	0	0	0	1	1	6
hsa-miR-423-5p	MIMAT0004748	POU6F1	5463	NM_002702	POU6F1	1	1	1	0	0	0	0	0	1	0	1	1	6
hsa-miR-423-5p	MIMAT0004748	PPP1R8	5511	NM_138558	PPP1R8	1	1	0	0	0	1	0	0	0	1	1	1	6
hsa-miR-423-5p	MIMAT0004748	PPP2R5D	5528	NM_001270476	PPP2R5D	1	1	0	0	0	1	0	0	0	1	1	1	6
hsa-miR-423-5p	MIMAT0004748	RAB6A	5870	NM_002869	RAB6A	1	1	0	0	0	1	0	0	0	1	1	1	6
hsa-miR-423-5p	MIMAT0004748	RAB6A	5870	NM_198896	RAB6A	1	1	0	0	0	1	0	0	0	1	1	1	6
hsa-miR-423-5p	MIMAT0004748	RABIF	5877	NM_002871	RABIF	1	1	1	0	0	0	0	0	1	0	1	1	6
hsa-miR-423-5p	MIMAT0004748	RANBP1	5902	NM_001278639	RANBP1	1	1	1	0	0	1	0	0	0	0	1	1	6
hsa-miR-423-5p	MIMAT0004748	RAP1GAP	5909	XM_005245955	RAP1GAP	1	1	0	0	0	1	0	0	0	1	1	1	6
hsa-miR-423-5p	MIMAT0004748	RBMS2	5939	NM_002898	RBMS2	1	1	1	1	0	0	0	0	0	0	1	1	6
hsa-miR-423-5p	MIMAT0004748	RFX1	5989	NM_002918	RFX1	1	1	0	0	0	1	0	0	1	1	1	0	6
hsa-miR-423-5p	MIMAT0004748	BRD2	6046	NM_005104	BRD2	1	1	0	0	0	1	0	0	0	1	1	1	6
hsa-miR-423-5p	MIMAT0004748	RPA1	6117	NM_002945	RPA1	1	1	0	0	0	1	0	0	1	1	1	0	6
hsa-miR-423-5p	MIMAT0004748	RTKN	6242	NM_033046	RTKN	1	1	1	0	0	1	0	0	0	0	1	1	6
hsa-miR-423-5p	MIMAT0004748	CLIP1	6249	XM_005253593	CLIP1	1	1	0	0	0	1	0	0	0	1	1	1	6
hsa-miR-423-5p	MIMAT0004748	CLIP1	6249	XM_005253594	CLIP1	1	1	0	0	0	1	0	0	0	1	1	1	6
hsa-miR-423-5p	MIMAT0004748	SRL	6345	NM_001098814	SRL	1	1	0	0	0	1	0	0	1	1	1	0	6
hsa-miR-423-5p	MIMAT0004748	SFTPB	6439	NM_000542	SFTPB	1	1	0	0	0	1	0	0	1	1	1	0	6
hsa-miR-423-5p	MIMAT0004748	SLC6A4	6532	NM_001045	SLC6A4	1	1	0	0	0	1	0	0	1	1	1	0	6
hsa-miR-423-5p	MIMAT0004748	SLC11A1	6556	NM_000578	SLC11A1	1	1	0	0	0	1	0	0	1	1	1	0	6
hsa-miR-423-5p	MIMAT0004748	SLC16A2	6567	NM_006517	SLC16A2	1	1	0	0	0	1	0	0	1	1	1	0	6
hsa-miR-423-5p	MIMAT0004748	SOX10	6663	NM_006941	SOX10	1	1	0	0	0	1	0	0	1	1	1	0	6
hsa-miR-423-5p	MIMAT0004748	SP2	6668	XM_005257611	SP2	1	1	0	0	0	1	0	0	0	1	1	1	6
hsa-miR-423-5p	MIMAT0004748	SRPR	6734	NM_003139	SRPR	1	1	0	0	0	1	0	0	1	1	1	0	6
hsa-miR-423-5p	MIMAT0004748	STAT3	6774	XM_005257614	STAT3	1	1	0	0	0	1	0	0	0	1	1	1	6
hsa-miR-423-5p	MIMAT0004748	TBCA	6902	XM_005248586	TBCA	1	1	0	0	0	1	0	0	0	1	1	1	6
hsa-miR-423-5p	MIMAT0004748	TBX6	6911	XM_005255523	TBX6	1	1	1	0	0	1	0	0	0	0	1	1	6
hsa-miR-423-5p	MIMAT0004748	TCF7	6932	NM_001134851	TCF7	1	1	0	0	0	1	0	0	0	1	1	1	6
hsa-miR-423-5p	MIMAT0004748	DYNLT3	6990	NM_006520	DYNLT3	1	1	0	0	0	1	0	0	1	0	1	1	6
hsa-miR-423-5p	MIMAT0004748	TFAP4	7023	NM_003223	TFAP4	1	1	0	0	0	1	0	0	1	1	1	0	6
hsa-miR-423-5p	MIMAT0004748	TGFA	7039	XM_005264522	TGFA	1	1	0	0	0	1	0	0	0	1	1	1	6
hsa-miR-423-5p	MIMAT0004748	TGFA	7039	XM_005278324	TGFA	1	1	0	0	0	1	0	0	0	1	1	1	6
hsa-miR-423-5p	MIMAT0004748	THRA	7067	NM_003250	THRA	1	1	0	0	0	1	0	0	1	1	1	0	6
hsa-miR-423-5p	MIMAT0004748	THY1	7070	NM_006288	THY1	1	1	1	0	0	0	0	0	1	0	1	1	6
hsa-miR-423-5p	MIMAT0004748	TIMP2	7077	NM_003255	TIMP2	1	1	0	0	0	1	0	0	1	1	1	0	6
hsa-miR-423-5p	MIMAT0004748	TK2	7084	NM_001271934	TK2	1	1	0	0	0	1	0	0	0	1	1	1	6
hsa-miR-423-5p	MIMAT0004748	TKT	7086	NM_001135055	TKT	1	1	0	0	0	1	0	0	0	1	1	1	6
hsa-miR-423-5p	MIMAT0004748	TPI1	7167	XM_005253762	TPI1	1	1	0	0	0	1	0	0	0	1	1	1	6
hsa-miR-423-5p	MIMAT0004748	TPI1	7167	XM_005277757	TPI1	1	1	0	0	0	1	0	0	0	1	1	1	6
hsa-miR-423-5p	MIMAT0004748	UBE2N	7334	NM_003348	UBE2N	1	1	1	0	0	0	0	0	1	0	1	1	6
hsa-miR-423-5p	MIMAT0004748	UCHL1	7345	NM_004181	UCHL1	1	1	0	0	0	1	0	0	1	0	1	1	6
hsa-miR-423-5p	MIMAT0004748	VEGFB	7423	NM_003377	VEGFB	1	1	0	0	0	0	0	1	1	0	1	1	6
hsa-miR-423-5p	MIMAT0004748	WNT3	7473	NM_030753	WNT3	1	1	1	0	0	1	0	0	0	0	1	1	6
hsa-miR-423-5p	MIMAT0004748	ZNF70	7621	NM_021916	ZNF70	1	1	0	0	0	1	0	0	1	1	1	0	6
hsa-miR-423-5p	MIMAT0004748	ZNF74	7625	NM_003426	ZNF74	1	1	1	0	0	0	0	0	1	0	1	1	6
hsa-miR-423-5p	MIMAT0004748	ZMYM2	7750	NM_003453	ZMYM2	1	1	0	0	0	1	0	0	0	1	1	1	6
hsa-miR-423-5p	MIMAT0004748	MAP3K12	7786	XM_005269139	MAP3K12	1	1	1	0	0	1	0	0	0	0	1	1	6
hsa-miR-423-5p	MIMAT0004748	ZYX	7791	XM_005250052	ZYX	1	1	1	0	0	1	0	0	0	0	1	1	6
hsa-miR-423-5p	MIMAT0004748	FZD5	7855	NM_003468	FZD5	1	1	0	0	0	1	0	0	1	1	1	0	6
hsa-miR-423-5p	MIMAT0004748	RAB7A	7879	NM_004637	RAB7A	1	1	0	0	0	1	0	0	1	1	1	0	6
hsa-miR-423-5p	MIMAT0004748	ABHD16A	7920	NM_001177515	ABHD16A	1	1	0	0	0	1	0	0	0	1	1	1	6
hsa-miR-423-5p	MIMAT0004748	FZD3	7976	NM_017412	FZD3	1	1	0	0	0	1	0	0	0	1	1	1	6
hsa-miR-423-5p	MIMAT0004748	SMC1A	8243	NM_001281463	SMC1A	1	1	0	0	0	1	0	0	0	1	1	1	6
hsa-miR-423-5p	MIMAT0004748	HIST1H3I	8354	NM_003533	HIST1H3I	1	1	1	0	0	1	0	0	0	0	1	1	6
hsa-miR-423-5p	MIMAT0004748	SLC25A11	8402	NM_003562	SLC25A11	1	1	0	0	0	1	0	0	1	0	1	1	6
hsa-miR-423-5p	MIMAT0004748	SUPT3H	8464	NM_181356	SUPT3H	1	1	1	0	0	0	0	0	1	0	1	1	6
hsa-miR-423-5p	MIMAT0004748	CDC14B	8555	NM_033331	CDC14B	1	1	0	0	0	1	0	0	0	1	1	1	6
hsa-miR-423-5p	MIMAT0004748	DCHS1	8642	XM_005253207	DCHS1	1	1	0	0	0	1	0	0	0	1	1	1	6
hsa-miR-423-5p	MIMAT0004748	KCNK5	8645	NM_003740	KCNK5	1	1	0	0	0	1	0	0	1	0	1	1	6
hsa-miR-423-5p	MIMAT0004748	TNKS	8658	XM_005272399	TNKS	0	1	1	0	0	1	0	0	0	1	1	1	6
hsa-miR-423-5p	MIMAT0004748	VAMP4	8674	NM_003762	VAMP4	0	1	1	0	0	1	0	0	0	1	1	1	6
hsa-miR-423-5p	MIMAT0004748	DGAT1	8694	NM_012079	DGAT1	1	1	1	0	0	0	0	1	0	0	1	1	6
hsa-miR-423-5p	MIMAT0004748	B4GALT3	8703	NM_001199873	B4GALT3	1	1	1	0	0	1	0	0	0	0	1	1	6
hsa-miR-423-5p	MIMAT0004748	RIPK1	8737	XM_005249457	RIPK1	1	1	0	0	0	1	0	0	0	1	1	1	6
hsa-miR-423-5p	MIMAT0004748	CDS2	8760	NM_003818	CDS2	0	1	1	0	0	1	0	0	0	1	1	1	6
hsa-miR-423-5p	MIMAT0004748	ALKBH1	8846	NM_006020	ALKBH1	1	1	0	0	0	1	0	0	1	1	1	0	6
hsa-miR-423-5p	MIMAT0004748	MTMR3	8897	NM_021090	MTMR3	1	1	0	0	0	1	0	0	0	1	1	1	6
hsa-miR-423-5p	MIMAT0004748	PAPSS2	9060	NM_001015880	PAPSS2	1	1	0	0	0	1	0	0	0	1	1	1	6
hsa-miR-423-5p	MIMAT0004748	CBFA2T2	9139	NM_005093	CBFA2T2	0	1	1	0	0	1	0	0	0	1	1	1	6
hsa-miR-423-5p	MIMAT0004748	NEURL	9148	NM_004210	NEURL	1	1	0	0	0	1	0	0	1	0	1	1	6
hsa-miR-423-5p	MIMAT0004748	VAPB	9217	NM_004738	VAPB	1	1	0	0	0	1	0	0	1	1	1	0	6
hsa-miR-423-5p	MIMAT0004748	RAB11B	9230	NM_004218	RAB11B	0	1	1	0	0	1	0	0	0	1	1	1	6
hsa-miR-423-5p	MIMAT0004748	CRLF1	9244	NM_004750	CRLF1	0	1	1	0	0	1	0	0	1	0	1	1	6
hsa-miR-423-5p	MIMAT0004748	NUMBL	9253	NM_004756	NUMBL	1	1	1	0	0	0	0	0	1	0	1	1	6
hsa-miR-423-5p	MIMAT0004748	CACNA2D2	9254	NM_001174051	CACNA2D2	1	1	1	0	0	1	0	0	0	0	1	1	6
hsa-miR-423-5p	MIMAT0004748	SLIT2	9353	XM_005248211	SLIT2	0	1	1	0	0	1	0	0	0	1	1	1	6
hsa-miR-423-5p	MIMAT0004748	IGDCC3	9543	NM_004884	IGDCC3	0	1	1	0	0	1	0	0	1	0	1	1	6
hsa-miR-423-5p	MIMAT0004748	CXCL14	9547	NM_004887	CXCL14	1	1	0	0	0	1	0	0	1	1	1	0	6
hsa-miR-423-5p	MIMAT0004748	PREPL	9581	NM_006036	PREPL	1	1	0	0	0	1	0	0	0	1	1	1	6
hsa-miR-423-5p	MIMAT0004748	AKAP12	9590	XM_005267234	AKAP12	1	1	0	0	0	1	0	0	0	1	1	1	6
hsa-miR-423-5p	MIMAT0004748	PUM1	9698	XM_005271357	PUM1	0	1	1	0	0	1	0	0	0	1	1	1	6
hsa-miR-423-5p	MIMAT0004748	ARHGAP32	9743	NM_001142685	ARHGAP32	1	1	0	0	0	1	0	0	0	1	1	1	6
hsa-miR-423-5p	MIMAT0004748	CLSTN3	9746	XM_005253531	CLSTN3	1	1	1	0	0	1	0	0	0	0	1	1	6
hsa-miR-423-5p	MIMAT0004748	KIAA0513	9764	XM_005256265	KIAA0513	0	1	1	0	0	1	0	0	0	1	1	1	6
hsa-miR-423-5p	MIMAT0004748	TM9SF4	9777	XM_005260622	TM9SF4	1	1	0	0	0	1	0	0	0	1	1	1	6
hsa-miR-423-5p	MIMAT0004748	GAB2	9846	NM_080491	GAB2	1	1	0	0	0	1	0	0	0	1	1	1	6
hsa-miR-423-5p	MIMAT0004748	SGSM2	9905	NM_014853	SGSM2	1	1	0	0	0	1	0	0	0	1	1	1	6
hsa-miR-423-5p	MIMAT0004748	XYLB	9942	NM_005108	XYLB	1	1	0	0	0	1	0	0	1	1	1	0	6
hsa-miR-423-5p	MIMAT0004748	AMMECR1	9949	NM_001171689	AMMECR1	1	1	0	0	0	1	0	0	0	1	1	1	6
hsa-miR-423-5p	MIMAT0004748	ARL4C	10123	NM_005737	ARL4C	1	1	0	0	0	1	0	0	1	1	1	0	6
hsa-miR-423-5p	MIMAT0004748	DNAL4	10126	NM_005740	DNAL4	1	1	0	0	0	1	0	0	1	0	1	1	6
hsa-miR-423-5p	MIMAT0004748	FLOT1	10211	XM_005248781	FLOT1	1	1	0	0	0	1	0	0	0	1	1	1	6
hsa-miR-423-5p	MIMAT0004748	SPRY1	10252	XM_005262686	SPRY1	1	1	0	0	0	1	0	0	0	1	1	1	6
hsa-miR-423-5p	MIMAT0004748	IKZF1	10320	NM_006060	IKZF1	1	1	0	0	0	1	0	0	1	1	1	0	6
hsa-miR-423-5p	MIMAT0004748	PPIE	10450	NM_006112	PPIE	1	1	0	0	0	1	0	0	0	1	1	1	6
hsa-miR-423-5p	MIMAT0004748	VAV3	10451	XM_005270358	VAV3	0	1	1	0	0	1	0	0	0	1	1	1	6
hsa-miR-423-5p	MIMAT0004748	CARM1	10498	NM_199141	CARM1	0	1	1	0	0	1	0	0	1	0	1	1	6
hsa-miR-423-5p	MIMAT0004748	ERN2	10595	NM_033266	ERN2	1	1	0	0	0	1	0	0	1	0	1	1	6
hsa-miR-423-5p	MIMAT0004748	AHSA1	10598	NM_012111	AHSA1	0	1	1	0	0	1	0	0	1	0	1	1	6
hsa-miR-423-5p	MIMAT0004748	PDLIM5	10611	XM_005262693	PDLIM5	1	1	0	0	0	1	0	0	0	1	1	1	6
hsa-miR-423-5p	MIMAT0004748	ARID3B	10620	XM_005254129	ARID3B	0	1	1	0	0	1	0	0	0	1	1	1	6
hsa-miR-423-5p	MIMAT0004748	PDPN	10630	NM_006474	PDPN	1	1	0	0	0	1	0	0	0	1	1	1	6
hsa-miR-423-5p	MIMAT0004748	TBR1	10716	NM_006593	TBR1	1	1	1	0	0	0	0	0	1	0	1	1	6
hsa-miR-423-5p	MIMAT0004748	TSPAN9	10867	NM_006675	TSPAN9	1	1	0	0	0	1	0	0	1	1	1	0	6
hsa-miR-423-5p	MIMAT0004748	EHMT2	10919	XM_005248824	EHMT2	0	1	1	0	0	1	0	0	0	1	1	1	6
hsa-miR-423-5p	MIMAT0004748	STARD3	10948	NM_006804	STARD3	1	1	1	0	0	0	0	0	1	0	1	1	6
hsa-miR-423-5p	MIMAT0004748	CCDC85B	11007	NM_006848	CCDC85B	0	1	1	0	0	1	0	0	1	0	1	1	6
hsa-miR-423-5p	MIMAT0004748	ATF7	11016	XM_005268586	ATF7	1	1	0	0	0	1	0	0	0	1	1	1	6
hsa-miR-423-5p	MIMAT0004748	VAX1	11023	NM_199131	VAX1	1	1	0	0	0	1	0	0	1	0	1	1	6
hsa-miR-423-5p	MIMAT0004748	C10orf10	11067	NM_007021	C10orf10	1	1	0	0	0	1	0	0	1	1	1	0	6
hsa-miR-423-5p	MIMAT0004748	PTPN21	11099	XM_005267287	PTPN21	1	1	0	0	0	1	0	0	0	1	1	1	6
hsa-miR-423-5p	MIMAT0004748	FAM107A	11170	NM_007177	FAM107A	1	1	0	0	0	1	0	0	0	1	1	1	6
hsa-miR-423-5p	MIMAT0004748	ABCB8	11194	NM_007188	ABCB8	1	1	0	0	0	1	0	0	1	1	1	0	6
hsa-miR-423-5p	MIMAT0004748	NRM	11270	NM_007243	NRM	1	1	0	0	0	1	0	0	0	1	1	1	6
hsa-miR-423-5p	MIMAT0004748	TUSC2	11334	NM_007275	TUSC2	1	1	0	0	0	1	0	0	1	1	1	0	6
hsa-miR-423-5p	MIMAT0004748	U2AF2	11338	NM_007279	U2AF2	1	1	1	0	0	1	0	0	0	0	1	1	6
hsa-miR-423-5p	MIMAT0004748	CLSTN1	22883	NM_001009566	CLSTN1	0	1	1	0	0	1	0	0	0	1	1	1	6
hsa-miR-423-5p	MIMAT0004748	CARD8	22900	NM_001184902	CARD8	0	1	1	0	0	0	0	1	0	1	1	1	6
hsa-miR-423-5p	MIMAT0004748	RALY	22913	NM_016732	RALY	1	1	1	0	0	1	0	0	0	0	1	1	6
hsa-miR-423-5p	MIMAT0004748	SV2C	22987	XM_005248470	SV2C	1	1	1	0	0	1	0	0	0	0	1	1	6
hsa-miR-423-5p	MIMAT0004748	MAST3	23031	XM_005259822	MAST3	1	1	0	0	0	1	0	0	0	1	1	1	6
hsa-miR-423-5p	MIMAT0004748	TNIK	23043	NM_015028	TNIK	0	1	1	0	0	1	0	0	0	1	1	1	6
hsa-miR-423-5p	MIMAT0004748	NMNAT2	23057	NM_015039	NMNAT2	0	1	1	0	0	1	0	0	0	1	1	1	6
hsa-miR-423-5p	MIMAT0004748	TBC1D9B	23061	NM_198868	TBC1D9B	0	1	1	0	0	1	0	0	0	1	1	1	6
hsa-miR-423-5p	MIMAT0004748	CAND2	23066	NM_001162499	CAND2	1	1	0	0	0	1	0	0	0	1	1	1	6
hsa-miR-423-5p	MIMAT0004748	PEG10	23089	NM_001040152	PEG10	1	1	0	0	0	1	0	0	0	1	1	1	6
hsa-miR-423-5p	MIMAT0004748	PEG10	23089	NM_001184961	PEG10	1	1	0	0	0	1	0	0	0	1	1	1	6
hsa-miR-423-5p	MIMAT0004748	PEG10	23089	NM_001184962	PEG10	1	1	0	0	0	1	0	0	0	1	1	1	6
hsa-miR-423-5p	MIMAT0004748	PEG10	23089	NM_015068	PEG10	1	1	0	0	0	1	0	0	0	1	1	1	6
hsa-miR-423-5p	MIMAT0004748	ZZEF1	23140	XM_005256561	ZZEF1	0	1	1	0	0	1	0	0	0	1	1	1	6
hsa-miR-423-5p	MIMAT0004748	NCDN	23154	XM_005270660	NCDN	1	1	1	0	0	1	0	0	0	0	1	1	6
hsa-miR-423-5p	MIMAT0004748	ARC	23237	NM_015193	ARC	1	1	1	0	0	0	0	0	1	0	1	1	6
hsa-miR-423-5p	MIMAT0004748	PDS5A	23244	NM_001100399	PDS5A	1	1	0	0	0	1	0	0	0	1	1	1	6
hsa-miR-423-5p	MIMAT0004748	ATP11A	23250	XM_005268305	ATP11A	1	1	0	0	0	1	0	0	0	1	1	1	6
hsa-miR-423-5p	MIMAT0004748	SMG6	23293	XM_005256569	SMG6	0	1	1	0	0	1	0	0	0	1	1	1	6
hsa-miR-423-5p	MIMAT0004748	MGRN1	23295	NM_001142290	MGRN1	0	1	1	0	0	1	0	0	0	1	1	1	6
hsa-miR-423-5p	MIMAT0004748	UBR2	23304	XM_005248965	UBR2	1	1	1	0	0	1	0	0	0	0	1	1	6
hsa-miR-423-5p	MIMAT0004748	PHF15	23338	XM_005271948	PHF15	1	1	0	0	0	1	0	0	0	1	1	1	6
hsa-miR-423-5p	MIMAT0004748	COTL1	23406	NM_021149	COTL1	1	1	0	0	0	1	0	0	1	1	1	0	6
hsa-miR-423-5p	MIMAT0004748	OTP	23440	NM_032109	OTP	1	1	1	0	0	0	0	0	1	0	1	1	6
hsa-miR-423-5p	MIMAT0004748	RBFOX2	23543	XM_005261428	RBFOX2	0	1	1	0	0	1	0	0	0	1	1	1	6
hsa-miR-423-5p	MIMAT0004748	TSPAN15	23555	XM_005269665	TSPAN15	0	1	1	0	0	1	0	0	0	1	1	1	6
hsa-miR-423-5p	MIMAT0004748	CA14	23632	XM_005245058	CA14	1	1	0	0	0	1	0	0	0	1	1	1	6
hsa-miR-423-5p	MIMAT0004748	CA14	23632	XM_005277359	CA14	1	1	0	0	0	1	0	0	0	1	1	1	6
hsa-miR-423-5p	MIMAT0004748	FLRT3	23767	XM_005260682	FLRT3	1	1	0	0	0	1	0	0	0	1	1	1	6
hsa-miR-423-5p	MIMAT0004748	ABTB2	25841	NM_145804	ABTB2	0	1	0	0	0	1	0	0	1	1	1	1	6
hsa-miR-423-5p	MIMAT0004748	CLIC4	25932	NM_013943	CLIC4	0	1	0	0	0	1	0	0	1	1	1	1	6
hsa-miR-423-5p	MIMAT0004748	ZNF385A	25946	NM_015481	ZNF385A	0	1	1	0	0	1	0	0	1	0	1	1	6
hsa-miR-423-5p	MIMAT0004748	CLIP3	25999	NM_001199570	CLIP3	1	1	0	0	0	1	0	0	0	1	1	1	6
hsa-miR-423-5p	MIMAT0004748	OSBPL3	26031	NM_015550	OSBPL3	1	1	0	0	0	1	0	0	0	1	1	1	6
hsa-miR-423-5p	MIMAT0004748	SETBP1	26040	XM_005258243	SETBP1	1	1	0	0	0	1	0	0	0	1	1	1	6
hsa-miR-423-5p	MIMAT0004748	CHTOP	26097	NM_001206612	CHTOP	1	1	0	0	0	1	0	0	0	1	1	1	6
hsa-miR-423-5p	MIMAT0004748	TINF2	26277	XM_005267528	TINF2	0	1	1	0	0	1	0	0	0	1	1	1	6
hsa-miR-423-5p	MIMAT0004748	SEZ6L2	26470	NM_001243332	SEZ6L2	1	1	1	0	0	1	0	0	0	0	1	1	6
hsa-miR-423-5p	MIMAT0004748	PPP1R14B	26472	NM_138689	PPP1R14B	1	1	0	0	0	1	0	0	1	0	1	1	6
hsa-miR-423-5p	MIMAT0004748	IL36RN	26525	NM_012275	IL36RN	1	1	0	0	0	1	0	0	0	1	1	1	6
hsa-miR-423-5p	MIMAT0004748	CYFIP2	26999	NM_001037332	CYFIP2	1	1	0	0	0	1	0	0	0	1	1	1	6
hsa-miR-423-5p	MIMAT0004748	CNPPD1	27013	XM_005246463	CNPPD1	0	1	1	0	0	1	0	0	0	1	1	1	6
hsa-miR-423-5p	MIMAT0004748	VPS41	27072	NM_014396	VPS41	1	1	0	0	0	1	0	0	0	1	1	1	6
hsa-miR-423-5p	MIMAT0004748	CACNG4	27092	NM_014405	CACNG4	1	1	0	0	0	1	0	0	1	1	1	0	6
hsa-miR-423-5p	MIMAT0004748	HSPB7	27129	XM_005245842	HSPB7	1	1	0	0	0	1	0	0	0	1	1	1	6
hsa-miR-423-5p	MIMAT0004748	ARHGEF16	27237	NM_014448	ARHGEF16	0	1	1	0	0	1	0	0	1	0	1	1	6
hsa-miR-423-5p	MIMAT0004748	AHDC1	27245	XM_005245850	AHDC1	0	1	1	0	0	1	0	0	0	1	1	1	6
hsa-miR-423-5p	MIMAT0004748	ZNF544	27300	XM_005258756	ZNF544	1	1	0	0	0	1	0	0	0	1	1	1	6
hsa-miR-423-5p	MIMAT0004748	PGAP2	27315	NM_001256236	PGAP2	1	1	0	0	0	1	0	0	0	1	1	1	6
hsa-miR-423-5p	MIMAT0004748	KCNMB4	27345	NM_014505	KCNMB4	1	1	0	0	0	1	0	0	0	1	1	1	6
hsa-miR-423-5p	MIMAT0004748	GIT1	28964	NM_001085454	GIT1	0	1	1	0	0	1	0	0	0	1	1	1	6
hsa-miR-423-5p	MIMAT0004748	ORMDL2	29095	NM_014182	ORMDL2	1	1	0	0	0	0	0	1	1	0	1	1	6
hsa-miR-423-5p	MIMAT0004748	CARD10	29775	XM_005261591	CARD10	0	1	1	0	0	1	0	0	0	1	1	1	6
hsa-miR-423-5p	MIMAT0004748	RBM15B	29890	NM_013286	RBM15B	1	1	0	0	0	1	0	0	1	1	1	0	6
hsa-miR-423-5p	MIMAT0004748	SNX12	29934	NM_001256185	SNX12	0	1	1	0	0	1	0	0	0	1	1	1	6
hsa-miR-423-5p	MIMAT0004748	PADI1	29943	NM_013358	PADI1	1	1	0	0	0	1	0	0	1	1	1	0	6
hsa-miR-423-5p	MIMAT0004748	MINK1	50488	XM_005256664	MINK1	0	1	1	0	0	1	0	0	0	1	1	1	6
hsa-miR-423-5p	MIMAT0004748	DUOX2	50506	XM_005254421	DUOX2	0	1	1	0	0	1	0	0	0	1	1	1	6
hsa-miR-423-5p	MIMAT0004748	TMED5	50999	NM_001167830	TMED5	1	1	0	0	0	1	0	0	0	1	1	1	6
hsa-miR-423-5p	MIMAT0004748	MRPL4	51073	NM_146388	MRPL4	0	1	1	0	0	1	0	0	1	0	1	1	6
hsa-miR-423-5p	MIMAT0004748	SAR1B	51128	NM_001033503	SAR1B	1	1	0	0	0	1	0	0	0	1	1	1	6
hsa-miR-423-5p	MIMAT0004748	RLIM	51132	NM_183353	RLIM	1	1	1	0	1	0	0	0	0	0	1	1	6
hsa-miR-423-5p	MIMAT0004748	ZNF580	51157	XM_005258968	ZNF580	0	1	1	1	0	1	0	0	0	0	1	1	6
hsa-miR-423-5p	MIMAT0004748	LEF1	51176	NM_016269	LEF1	1	1	0	0	0	1	0	0	1	0	1	1	6
hsa-miR-423-5p	MIMAT0004748	CRBN	51185	NM_016302	CRBN	1	1	0	0	0	1	0	0	1	0	1	1	6
hsa-miR-423-5p	MIMAT0004748	BFAR	51283	NM_016561	BFAR	0	1	0	0	0	1	0	0	1	1	1	1	6
hsa-miR-423-5p	MIMAT0004748	TRIM33	51592	NM_015906	TRIM33	0	1	0	0	0	1	0	1	0	1	1	1	6
hsa-miR-423-5p	MIMAT0004748	YPEL5	51646	NM_001127401	YPEL5	1	1	0	0	0	1	0	0	0	1	1	1	6
hsa-miR-423-5p	MIMAT0004748	WWOX	51741	NM_016373	WWOX	1	1	0	0	0	1	0	0	1	0	1	1	6
hsa-miR-423-5p	MIMAT0004748	ATP8A2	51761	XM_005266419	ATP8A2	1	1	1	0	0	1	0	0	0	0	1	1	6
hsa-miR-423-5p	MIMAT0004748	ZFYVE1	53349	NM_021260	ZFYVE1	1	1	0	0	0	1	0	0	0	1	1	1	6
hsa-miR-423-5p	MIMAT0004748	MXRA8	54587	NM_032348	MXRA8	1	1	0	0	0	1	0	0	1	1	1	0	6
hsa-miR-423-5p	MIMAT0004748	VSIG10	54621	NM_019086	VSIG10	1	1	0	0	0	1	0	0	0	1	1	1	6
hsa-miR-423-5p	MIMAT0004748	MKS1	54903	NM_017777	MKS1	0	1	1	0	0	1	0	0	1	0	1	1	6
hsa-miR-423-5p	MIMAT0004748	FBXO34	55030	NM_017943	FBXO34	0	1	1	0	0	1	0	0	1	0	1	1	6
hsa-miR-423-5p	MIMAT0004748	SOBP	55084	NM_018013	SOBP	0	1	1	0	0	1	0	0	1	0	1	1	6
hsa-miR-423-5p	MIMAT0004748	ARHGAP17	55114	XM_005255414	ARHGAP17	1	1	0	0	0	1	0	0	0	1	1	1	6
hsa-miR-423-5p	MIMAT0004748	RPRD1A	55197	XM_005258294	RPRD1A	1	1	0	0	0	1	0	0	0	1	1	1	6
hsa-miR-423-5p	MIMAT0004748	ASIC4	55515	NM_182847	ASIC4	0	1	1	0	0	1	0	0	0	1	1	1	6
hsa-miR-423-5p	MIMAT0004748	OTUD5	55593	XM_005272622	OTUD5	1	1	1	0	0	1	0	0	0	0	1	1	6
hsa-miR-423-5p	MIMAT0004748	OTUB1	55611	NM_017670	OTUB1	1	1	1	0	0	0	0	0	1	0	1	1	6
hsa-miR-423-5p	MIMAT0004748	AMBRA1	55626	XM_005253010	AMBRA1	0	1	1	0	0	1	0	0	0	1	1	1	6
hsa-miR-423-5p	MIMAT0004748	SMPD4	55627	XM_005263698	SMPD4	0	1	1	0	0	1	0	0	0	1	1	1	6
hsa-miR-423-5p	MIMAT0004748	BTBD2	55643	NM_017797	BTBD2	0	1	1	0	0	1	0	0	1	0	1	1	6
hsa-miR-423-5p	MIMAT0004748	MBNL3	55796	XM_005262434	MBNL3	1	1	0	0	0	1	0	0	0	1	1	1	6
hsa-miR-423-5p	MIMAT0004748	ADAP2	55803	XM_005258010	ADAP2	0	1	0	1	0	1	0	0	0	1	1	1	6
hsa-miR-423-5p	MIMAT0004748	FOXJ2	55810	NM_018416	FOXJ2	0	1	0	1	0	1	0	0	1	1	1	0	6
hsa-miR-423-5p	MIMAT0004748	ASH1L	55870	NM_018489	ASH1L	1	1	0	0	0	1	0	0	1	1	1	0	6
hsa-miR-423-5p	MIMAT0004748	ZNF395	55893	XM_005273572	ZNF395	1	1	0	0	0	1	0	0	0	1	1	1	6
hsa-miR-423-5p	MIMAT0004748	BARX1	56033	NM_021570	BARX1	1	1	0	0	0	1	0	0	1	0	1	1	6
hsa-miR-423-5p	MIMAT0004748	WDR45B	56270	NM_019613	WDR45B	1	1	0	0	0	1	0	0	1	0	1	1	6
hsa-miR-423-5p	MIMAT0004748	KCNQ5	56479	NM_001160133	KCNQ5	1	1	0	0	0	1	0	0	0	1	1	1	6
hsa-miR-423-5p	MIMAT0004748	PANX2	56666	NM_052839	PANX2	0	1	1	0	0	1	0	0	1	0	1	1	6
hsa-miR-423-5p	MIMAT0004748	NDUFA4L2	56901	NM_020142	NDUFA4L2	0	1	1	0	0	1	0	0	1	0	1	1	6
hsa-miR-423-5p	MIMAT0004748	COQ9	57017	NM_020312	COQ9	1	1	0	0	0	1	0	0	1	0	1	1	6
hsa-miR-423-5p	MIMAT0004748	RNPEPL1	57140	NM_018226	RNPEPL1	1	1	1	0	0	0	0	0	1	0	1	1	6
hsa-miR-423-5p	MIMAT0004748	TMCC3	57458	XM_005269040	TMCC3	0	1	1	0	0	1	0	0	0	1	1	1	6
hsa-miR-423-5p	MIMAT0004748	ZNF608	57507	XM_005272039	ZNF608	1	1	1	0	0	1	0	0	0	0	1	1	6
hsa-miR-423-5p	MIMAT0004748	NYNRIN	57523	NM_025081	NYNRIN	1	1	0	0	0	1	0	0	1	1	1	0	6
hsa-miR-423-5p	MIMAT0004748	RGAG1	57529	XM_005262173	RGAG1	1	1	0	0	0	1	0	0	0	1	1	1	6
hsa-miR-423-5p	MIMAT0004748	CGN	57530	NM_020770	CGN	1	1	0	0	0	1	0	0	1	1	1	0	6
hsa-miR-423-5p	MIMAT0004748	TAOK1	57551	NM_020791	TAOK1	0	1	1	0	0	1	0	0	0	1	1	1	6
hsa-miR-423-5p	MIMAT0004748	ARRDC3	57561	NM_020801	ARRDC3	1	1	0	0	0	1	0	0	1	0	1	1	6
hsa-miR-423-5p	MIMAT0004748	BAHCC1	57597	NM_001080519	BAHCC1	1	1	1	0	0	0	0	0	1	0	1	1	6
hsa-miR-423-5p	MIMAT0004748	GPAM	57678	XM_005269998	GPAM	1	1	0	0	0	1	0	0	0	1	1	1	6
hsa-miR-423-5p	MIMAT0004748	DENND1A	57706	XM_005252110	DENND1A	1	1	0	0	0	1	0	0	0	1	1	1	6
hsa-miR-423-5p	MIMAT0004748	CREBZF	58487	NM_001039618	CREBZF	1	1	1	0	0	0	0	0	1	0	1	1	6
hsa-miR-423-5p	MIMAT0004748	CELF5	60680	NM_001172673	CELF5	1	1	1	0	0	1	0	0	0	0	1	1	6
hsa-miR-423-5p	MIMAT0004748	KIF13A	63971	XM_005249290	KIF13A	0	1	1	0	0	1	0	0	0	1	1	1	6
hsa-miR-423-5p	MIMAT0004748	ZMAT3	64393	NM_152240	ZMAT3	1	1	0	0	0	1	0	0	0	1	1	1	6
hsa-miR-423-5p	MIMAT0004748	TTC31	64427	XM_005264493	TTC31	0	1	1	0	0	1	0	0	0	1	1	1	6
hsa-miR-423-5p	MIMAT0004748	NUCKS1	64710	NM_022731	NUCKS1	1	1	0	0	0	1	0	0	0	1	1	1	6
hsa-miR-423-5p	MIMAT0004748	AEN	64782	XM_005254967	AEN	1	1	0	0	0	1	0	0	0	1	1	1	6
hsa-miR-423-5p	MIMAT0004748	FNDC4	64838	NM_022823	FNDC4	1	1	0	0	0	1	0	0	1	1	1	0	6
hsa-miR-423-5p	MIMAT0004748	LRRC61	65999	XM_005250044	LRRC61	1	1	1	0	0	1	0	0	0	0	1	1	6
hsa-miR-423-5p	MIMAT0004748	GDAP1L1	78997	NM_001256737	GDAP1L1	1	1	0	0	0	1	0	0	0	1	1	1	6
hsa-miR-423-5p	MIMAT0004748	ERI3	79033	XM_005271185	ERI3	0	1	1	0	0	1	0	0	0	1	1	1	6
hsa-miR-423-5p	MIMAT0004748	ATG9A	79065	XM_005246845	ATG9A	1	1	0	0	0	1	0	0	0	1	1	1	6
hsa-miR-423-5p	MIMAT0004748	MAP7D3	79649	NM_001173517	MAP7D3	1	1	0	0	0	1	0	0	0	1	1	1	6
hsa-miR-423-5p	MIMAT0004748	LIN28A	79727	NM_024674	LIN28A	1	1	0	0	0	1	0	0	1	1	1	0	6
hsa-miR-423-5p	MIMAT0004748	KCTD17	79734	XM_005261742	KCTD17	0	1	1	0	0	1	0	0	0	1	1	1	6
hsa-miR-423-5p	MIMAT0004748	TXNDC15	79770	NM_024715	TXNDC15	0	1	0	0	0	1	0	0	1	1	1	1	6
hsa-miR-423-5p	MIMAT0004748	EFCC1	79825	XM_005247781	EFCC1	0	1	1	0	0	1	0	0	0	1	1	1	6
hsa-miR-423-5p	MIMAT0004748	RABEP2	79874	XM_005255587	RABEP2	1	1	1	0	0	1	0	0	0	0	1	1	6
hsa-miR-423-5p	MIMAT0004748	SLC8B1	80024	XM_005253939	SLC8B1	1	1	1	0	0	1	0	0	0	0	1	1	6
hsa-miR-423-5p	MIMAT0004748	UXS1	80146	NM_001253876	UXS1	1	1	0	0	0	1	0	0	0	1	1	1	6
hsa-miR-423-5p	MIMAT0004748	EDC3	80153	NM_001142443	EDC3	0	1	1	0	0	1	0	0	0	1	1	1	6
hsa-miR-423-5p	MIMAT0004748	FUZ	80199	NM_025129	FUZ	0	1	1	0	0	1	0	0	1	0	1	1	6
hsa-miR-423-5p	MIMAT0004748	ITPKC	80271	NM_025194	ITPKC	0	1	1	0	0	1	0	0	1	0	1	1	6
hsa-miR-423-5p	MIMAT0004748	TTYH3	80727	NM_025250	TTYH3	1	1	0	0	0	1	0	0	1	1	1	0	6
hsa-miR-423-5p	MIMAT0004748	PRRT1	80863	NM_030651	PRRT1	0	1	1	0	0	1	0	0	0	1	1	1	6
hsa-miR-423-5p	MIMAT0004748	CCDC130	81576	XM_005260085	CCDC130	1	1	1	0	0	1	0	0	0	0	1	1	6
hsa-miR-423-5p	MIMAT0004748	UNC93B1	81622	NM_030930	UNC93B1	0	1	1	0	0	1	0	0	1	0	1	1	6
hsa-miR-423-5p	MIMAT0004748	RAB1B	81876	NM_030981	RAB1B	1	1	0	0	0	1	0	0	1	1	1	0	6
hsa-miR-423-5p	MIMAT0004748	SLC25A18	83733	XM_005261288	SLC25A18	0	1	1	0	0	1	0	0	0	1	1	1	6
hsa-miR-423-5p	MIMAT0004748	RSPH3	83861	NM_031924	RSPH3	1	1	0	0	0	1	0	0	1	0	1	1	6
hsa-miR-423-5p	MIMAT0004748	TOMM40L	84134	XM_005245536	TOMM40L	0	1	1	0	0	1	0	0	0	1	1	1	6
hsa-miR-423-5p	MIMAT0004748	ASCC2	84164	XM_005261776	ASCC2	1	1	0	0	0	1	0	0	0	1	1	1	6
hsa-miR-423-5p	MIMAT0004748	ZNF541	84215	XM_005259311	ZNF541	1	1	1	0	0	1	0	0	0	0	1	1	6
hsa-miR-423-5p	MIMAT0004748	ZDHHC18	84243	XM_005246016	ZDHHC18	1	1	1	0	0	0	0	0	0	1	1	1	6
hsa-miR-423-5p	MIMAT0004748	SGIP1	84251	XM_005271263	SGIP1	0	1	1	0	0	1	0	0	0	1	1	1	6
hsa-miR-423-5p	MIMAT0004748	SYVN1	84447	XM_005274354	SYVN1	0	1	1	0	0	1	0	0	0	1	1	1	6
hsa-miR-423-5p	MIMAT0004748	CREB3L3	84699	NM_032607	CREB3L3	0	1	1	0	0	1	0	0	1	0	1	1	6
hsa-miR-423-5p	MIMAT0004748	KLHL22	84861	NM_032775	KLHL22	1	1	0	0	0	1	0	0	1	1	1	0	6
hsa-miR-423-5p	MIMAT0004748	DIRC2	84925	NM_032839	DIRC2	1	1	0	0	0	1	0	0	0	1	1	1	6
hsa-miR-423-5p	MIMAT0004748	FIBCD1	84929	NM_032843	FIBCD1	1	1	0	0	0	1	0	0	1	1	1	0	6
hsa-miR-423-5p	MIMAT0004748	RAB2B	84932	NM_032846	RAB2B	1	1	0	0	0	1	0	0	1	1	1	0	6
hsa-miR-423-5p	MIMAT0004748	ZCCHC3	85364	NM_033089	ZCCHC3	0	1	1	0	0	1	0	0	1	0	1	1	6
hsa-miR-423-5p	MIMAT0004748	KIAA1671	85379	XM_005261793	KIAA1671	1	1	0	0	0	1	0	0	0	1	1	1	6
hsa-miR-423-5p	MIMAT0004748	PAPLN	89932	XM_005268185	PAPLN	0	1	1	0	0	1	0	0	0	1	1	1	6
hsa-miR-423-5p	MIMAT0004748	DUOXA1	90527	XM_005254773	DUOXA1	1	1	1	0	0	1	0	0	0	0	1	1	6
hsa-miR-423-5p	MIMAT0004748	TMEM55B	90809	NM_001100814	TMEM55B	0	1	1	0	0	1	0	0	0	1	1	1	6
hsa-miR-423-5p	MIMAT0004748	ANKRD40	91369	NM_052855	ANKRD40	0	1	1	0	0	1	0	0	0	1	1	1	6
hsa-miR-423-5p	MIMAT0004748	ELMSAN1	91748	NM_194278	ELMSAN1	0	1	1	0	0	1	0	0	0	1	1	1	6
hsa-miR-423-5p	MIMAT0004748	CDHR1	92211	NM_033100	CDHR1	1	1	0	0	0	1	0	0	1	1	1	0	6
hsa-miR-423-5p	MIMAT0004748	C17orf72	92340	NM_001164257	C17orf72	1	1	0	0	0	1	0	0	0	1	1	1	6
hsa-miR-423-5p	MIMAT0004748	CCDC64	92558	XM_005253992	CCDC64	1	1	0	0	0	1	0	0	0	1	1	1	6
hsa-miR-423-5p	MIMAT0004748	TMEM183A	92703	XM_005245612	TMEM183A	1	1	1	0	0	1	0	0	0	0	1	1	6
hsa-miR-423-5p	MIMAT0004748	ADAMTSL1	92949	NM_001040272	ADAMTSL1	0	1	0	0	0	1	0	0	1	1	1	1	6
hsa-miR-423-5p	MIMAT0004748	ZBTB47	92999	NM_145166	ZBTB47	1	1	1	0	0	0	0	0	1	0	1	1	6
hsa-miR-423-5p	MIMAT0004748	OPALIN	93377	NM_001040103	OPALIN	0	1	1	0	0	1	0	0	0	1	1	1	6
hsa-miR-423-5p	MIMAT0004748	TJAP1	93643	NM_001146018	TJAP1	1	1	0	0	0	1	0	0	0	1	1	1	6
hsa-miR-423-5p	MIMAT0004748	ATPIF1	93974	NM_178191	ATPIF1	1	1	0	0	0	1	0	0	1	0	1	1	6
hsa-miR-423-5p	MIMAT0004748	CAMK2N2	94032	NM_033259	CAMK2N2	1	1	0	0	0	1	0	0	1	0	1	1	6
hsa-miR-423-5p	MIMAT0004748	CASC4	113201	NM_138423	CASC4	1	1	0	0	0	1	0	0	0	1	1	1	6
hsa-miR-423-5p	MIMAT0004748	MRFAP1L1	114932	NM_203462	MRFAP1L1	0	1	1	0	1	1	0	0	0	0	1	1	6
hsa-miR-423-5p	MIMAT0004748	NT5C3B	115024	NM_052935	NT5C3B	0	1	1	0	0	1	0	0	1	0	1	1	6
hsa-miR-423-5p	MIMAT0004748	EVI5L	115704	XM_005272458	EVI5L	1	1	0	0	0	1	0	0	0	1	1	1	6
hsa-miR-423-5p	MIMAT0004748	SLC22A12	116085	NM_144585	SLC22A12	1	1	1	0	0	1	0	0	0	0	1	1	6
hsa-miR-423-5p	MIMAT0004748	ZMYND19	116225	XM_005266052	ZMYND19	1	1	1	0	0	1	0	0	0	0	1	1	6
hsa-miR-423-5p	MIMAT0004748	AGAP2	116986	XM_005268624	AGAP2	1	1	1	0	0	1	0	0	0	0	1	1	6
hsa-miR-423-5p	MIMAT0004748	UBE2J2	118424	XM_005244718	UBE2J2	0	1	1	0	0	1	0	0	0	1	1	1	6
hsa-miR-423-5p	MIMAT0004748	TC2N	123036	NM_152332	TC2N	1	1	0	0	0	1	0	0	1	1	1	0	6
hsa-miR-423-5p	MIMAT0004748	FSD2	123722	NM_001007122	FSD2	1	1	0	0	0	1	0	0	1	1	1	0	6
hsa-miR-423-5p	MIMAT0004748	DCUN1D3	123879	XM_005255098	DCUN1D3	1	1	1	0	0	0	0	0	0	1	1	1	6
hsa-miR-423-5p	MIMAT0004748	TBC1D16	125058	NM_019020	TBC1D16	1	1	1	0	0	1	0	0	0	0	1	1	6
hsa-miR-423-5p	MIMAT0004748	IRGQ	126298	NM_001007561	IRGQ	1	1	0	0	0	1	0	0	0	1	1	1	6
hsa-miR-423-5p	MIMAT0004748	MYOM3	127294	NM_152372	MYOM3	1	1	0	0	0	1	0	0	1	1	1	0	6
hsa-miR-423-5p	MIMAT0004748	TMEM125	128218	XM_005270467	TMEM125	1	1	0	0	0	1	0	0	0	1	1	1	6
hsa-miR-423-5p	MIMAT0004748	VSTM2L	128434	NM_080607	VSTM2L	1	1	0	0	0	1	0	0	1	1	1	0	6
hsa-miR-423-5p	MIMAT0004748	FAM168B	130074	NM_001009993	FAM168B	1	1	0	0	0	1	0	0	1	1	1	0	6
hsa-miR-423-5p	MIMAT0004748	ZFAND2B	130617	NM_138802	ZFAND2B	1	1	0	0	0	1	0	0	1	1	1	0	6
hsa-miR-423-5p	MIMAT0004748	TRIM40	135644	XM_005248855	TRIM40	0	1	1	0	0	1	0	0	0	1	1	1	6
hsa-miR-423-5p	MIMAT0004748	SRCRB4D	136853	NM_080744	SRCRB4D	0	1	1	0	0	1	0	0	1	0	1	1	6
hsa-miR-423-5p	MIMAT0004748	ASB6	140459	NM_017873	ASB6	1	1	1	0	1	0	0	0	0	0	1	1	6
hsa-miR-423-5p	MIMAT0004748	ASB8	140461	XM_005268658	ASB8	1	1	0	0	0	1	0	0	0	1	1	1	6
hsa-miR-423-5p	MIMAT0004748	S100A16	140576	XM_005244905	S100A16	0	1	1	0	0	1	0	0	0	1	1	1	6
hsa-miR-423-5p	MIMAT0004748	NEK7	140609	NM_133494	NEK7	1	1	0	0	0	1	0	0	0	1	1	1	6
hsa-miR-423-5p	MIMAT0004748	KCTD19	146212	XM_005255808	KCTD19	1	1	1	0	0	1	0	0	0	0	1	1	6
hsa-miR-423-5p	MIMAT0004748	CD300LF	146722	XM_005257073	CD300LF	1	1	0	0	0	1	0	0	0	1	1	1	6
hsa-miR-423-5p	MIMAT0004748	WIPF2	147179	XM_005257083	WIPF2	1	1	1	0	0	1	0	0	0	0	1	1	6
hsa-miR-423-5p	MIMAT0004748	C19orf55	148137	NM_001039887	C19orf55	1	1	0	0	0	1	0	0	1	1	1	0	6
hsa-miR-423-5p	MIMAT0004748	PROM2	150696	NM_001165978	PROM2	0	1	1	0	0	1	0	0	0	1	1	1	6
hsa-miR-423-5p	MIMAT0004748	THAP6	152815	XM_005262771	THAP6	1	1	0	0	0	1	0	0	0	1	1	1	6
hsa-miR-423-5p	MIMAT0004748	PLEKHG4B	153478	NM_052909	PLEKHG4B	1	1	1	0	0	0	0	0	1	0	1	1	6
hsa-miR-423-5p	MIMAT0004748	CLEC2L	154790	NM_001080511	CLEC2L	1	1	1	0	0	1	0	0	0	0	1	1	6
hsa-miR-423-5p	MIMAT0004748	TDRP	157695	NM_175075	TDRP	1	1	0	0	0	1	0	0	0	1	1	1	6
hsa-miR-423-5p	MIMAT0004748	MCMDC2	157777	NM_173518	MCMDC2	1	1	0	0	0	1	0	0	0	1	1	1	6
hsa-miR-423-5p	MIMAT0004748	ZXDB	158586	NM_007157	ZXDB	1	1	0	0	0	1	0	0	1	1	1	0	6
hsa-miR-423-5p	MIMAT0004748	NKX2-3	159296	NM_145285	NKX2-3	1	1	0	0	0	1	0	0	1	1	1	0	6
hsa-miR-423-5p	MIMAT0004748	GRASP	160622	XM_005268691	GRASP	0	1	1	0	0	1	0	0	0	1	1	1	6
hsa-miR-423-5p	MIMAT0004748	IFNLR1	163702	NM_170743	IFNLR1	0	1	1	0	0	1	0	0	0	1	1	1	6
hsa-miR-423-5p	MIMAT0004748	PSORS1C2	170680	NM_014069	PSORS1C2	1	1	0	0	0	1	0	0	0	1	1	1	6
hsa-miR-423-5p	MIMAT0004748	VWA3B	200403	XM_005263897	VWA3B	0	1	1	0	0	1	0	0	0	1	1	1	6
hsa-miR-423-5p	MIMAT0004748	LYRM9	201229	XM_005257944	LYRM9	1	1	1	0	0	1	0	0	0	0	1	1	6
hsa-miR-423-5p	MIMAT0004748	HIPK1	204851	XM_005270609	HIPK1	0	1	1	0	0	1	0	0	0	1	1	1	6
hsa-miR-423-5p	MIMAT0004748	HIPK1	204851	XM_005270610	HIPK1	0	1	1	0	0	1	0	0	0	1	1	1	6
hsa-miR-423-5p	MIMAT0004748	YPEL4	219539	XM_005273820	YPEL4	0	1	1	0	0	1	0	0	0	1	1	1	6
hsa-miR-423-5p	MIMAT0004748	TMEM136	219902	NM_001198670	TMEM136	0	1	1	0	0	1	0	0	0	1	1	1	6
hsa-miR-423-5p	MIMAT0004748	DOK6	220164	NM_152721	DOK6	0	1	1	0	0	1	0	0	0	1	1	1	6
hsa-miR-423-5p	MIMAT0004748	OAF	220323	NM_178507	OAF	1	1	1	0	0	0	0	0	1	0	1	1	6
hsa-miR-423-5p	MIMAT0004748	ARL5B	221079	XM_005252400	ARL5B	1	1	1	0	0	1	0	0	0	0	1	1	6
hsa-miR-423-5p	MIMAT0004748	GPC2	221914	NM_152742	GPC2	1	1	0	0	0	1	0	0	1	0	1	1	6
hsa-miR-423-5p	MIMAT0004748	ATXN7L1	222255	XM_005250220	ATXN7L1	1	1	0	0	0	1	0	0	0	1	1	1	6
hsa-miR-423-5p	MIMAT0004748	CNOT6L	246175	NM_144571	CNOT6L	1	1	0	0	0	1	0	0	1	1	1	0	6
hsa-miR-423-5p	MIMAT0004748	TMEM9	252839	XM_005245066	TMEM9	1	1	0	0	0	1	0	0	0	1	1	1	6
hsa-miR-423-5p	MIMAT0004748	STXBP4	252983	XM_005257185	STXBP4	0	1	1	0	0	1	0	0	0	1	1	1	6
hsa-miR-423-5p	MIMAT0004748	PRR14L	253143	XM_005261480	PRR14L	0	1	1	0	0	1	0	0	0	1	1	1	6
hsa-miR-423-5p	MIMAT0004748	GPATCH11	253635	NM_174931	GPATCH11	1	1	0	0	0	1	0	0	1	0	1	1	6
hsa-miR-423-5p	MIMAT0004748	CNIH2	254263	NM_182553	CNIH2	1	1	0	0	0	1	0	0	1	1	1	0	6
hsa-miR-423-5p	MIMAT0004748	SLC41A1	254428	NM_173854	SLC41A1	1	1	0	0	0	1	0	0	1	1	1	0	6
hsa-miR-423-5p	MIMAT0004748	MYADML2	255275	NM_001145113	MYADML2	1	1	1	0	0	1	0	0	0	0	1	1	6
hsa-miR-423-5p	MIMAT0004748	BCL9L	283149	NM_182557	BCL9L	0	1	1	1	0	0	0	0	1	0	1	1	6
hsa-miR-423-5p	MIMAT0004748	NOMO2	283820	NM_173614	NOMO2	0	1	1	0	0	1	0	0	1	0	1	1	6
hsa-miR-423-5p	MIMAT0004748	C17orf78	284099	XM_005257239	C17orf78	1	1	0	0	0	1	0	0	0	1	1	1	6
hsa-miR-423-5p	MIMAT0004748	NKPD1	284353	NM_198478	NKPD1	0	1	1	0	0	1	0	0	0	1	1	1	6
hsa-miR-423-5p	MIMAT0004748	ZNF615	284370	NM_001199324	ZNF615	1	1	0	0	0	1	0	0	0	1	1	1	6
hsa-miR-423-5p	MIMAT0004748	SCARA5	286133	NM_173833	SCARA5	0	1	1	0	0	1	0	0	1	0	1	1	6
hsa-miR-423-5p	MIMAT0004748	RAB37	326624	XM_005257287	RAB37	0	1	1	0	0	1	0	0	0	1	1	1	6
hsa-miR-423-5p	MIMAT0004748	FMN1	342184	NM_001277313	FMN1	1	1	1	0	0	1	0	0	0	0	1	1	6
hsa-miR-423-5p	MIMAT0004748	ENHO	375704	NM_198573	ENHO	0	1	1	0	0	1	0	0	1	0	1	1	6
hsa-miR-423-5p	MIMAT0004748	RAB15	376267	XM_005267598	RAB15	1	1	0	0	0	1	0	0	0	1	1	1	6
hsa-miR-423-5p	MIMAT0004748	SETD8	387893	NM_020382	SETD8	1	1	0	0	0	1	0	0	1	0	1	1	6
hsa-miR-423-5p	MIMAT0004748	C2orf71	388939	NM_001029883	C2orf71	1	1	0	0	0	1	0	0	1	0	1	1	6
hsa-miR-423-5p	MIMAT0004748	LDLRAD2	401944	NM_001013693	LDLRAD2	1	1	0	0	0	1	0	0	1	1	1	0	6
hsa-miR-423-5p	MIMAT0004748	RNASE13	440163	NM_001012264	RNASE13	1	1	0	0	0	1	0	0	1	1	1	0	6
hsa-miR-423-5p	MIMAT0004748	ETV3L	440695	NM_001004341	ETV3L	0	1	1	0	0	1	0	0	1	0	1	1	6
hsa-miR-423-5p	MIMAT0004748	POTEM	641455	NM_001145442	POTEM	1	1	1	0	0	1	0	0	0	0	1	1	6
hsa-miR-423-5p	MIMAT0004748	C18orf63	644041	NM_001174123	C18orf63	0	1	1	0	0	1	0	0	0	1	1	1	6
hsa-miR-423-5p	MIMAT0004748	GATSL3	652968	NM_001037666	GATSL3	1	1	0	0	0	1	0	0	1	1	1	0	6
hsa-miR-423-5p	MIMAT0004748	PPAN-P2RY11	692312	NM_001198690	PPAN-P2RY11	1	1	1	0	0	1	0	0	0	0	1	1	6
hsa-miR-423-5p	MIMAT0004748	SLC35E2B	728661	NM_001110781	SLC35E2B	0	1	1	0	0	1	0	0	0	1	1	1	6
hsa-miR-423-5p	MIMAT0004748	JMJD7	100137047	NM_001114632	JMJD7	0	1	1	0	0	1	0	0	0	1	1	1	6
hsa-miR-423-5p	MIMAT0004748	RASA4B	100271927	XM_005250084	RASA4B	1	1	0	0	0	1	0	0	0	1	1	1	6
hsa-miR-423-5p	MIMAT0004748	ZNF783	100289678	NM_001195220	ZNF783	0	1	1	0	0	1	0	0	0	1	1	1	6
hsa-miR-423-5p	MIMAT0004748	ABL1	25	XM_005272177	ABL1	1	0	1	0	0	1	0	0	0	1	1	1	6
hsa-miR-423-5p	MIMAT0004748	ABR	29	NM_001159746	ABR	1	0	1	0	0	1	0	0	0	1	1	1	6
hsa-miR-423-5p	MIMAT0004748	ACACA	31	NM_198836	ACACA	1	0	1	0	1	1	0	0	0	0	1	1	6
hsa-miR-423-5p	MIMAT0004748	ACACA	31	NM_198837	ACACA	1	0	1	0	1	1	0	0	0	0	1	1	6
hsa-miR-423-5p	MIMAT0004748	ACACA	31	NM_198838	ACACA	1	0	1	0	1	1	0	0	0	0	1	1	6
hsa-miR-423-5p	MIMAT0004748	ACACA	31	NM_198834	ACACA	1	0	1	0	1	1	0	0	0	0	1	1	6
hsa-miR-423-5p	MIMAT0004748	ASIC1	41	NM_001256830	ASIC1	1	0	1	0	0	1	0	1	0	0	1	1	6
hsa-miR-423-5p	MIMAT0004748	ASIC1	41	NM_001095	ASIC1	1	0	1	0	0	1	0	1	0	0	1	1	6
hsa-miR-423-5p	MIMAT0004748	ACHE	43	NM_000665	ACHE	1	0	1	0	0	1	0	1	0	0	1	1	6
hsa-miR-423-5p	MIMAT0004748	ACVR1B	91	NM_004302	ACVR1B	1	0	1	0	0	1	0	0	1	0	1	1	6
hsa-miR-423-5p	MIMAT0004748	ACVRL1	94	XM_005269235	ACVRL1	1	0	1	0	0	1	0	0	0	1	1	1	6
hsa-miR-423-5p	MIMAT0004748	ADAM8	101	NM_001109	ADAM8	1	0	1	0	0	1	0	0	1	0	1	1	6
hsa-miR-423-5p	MIMAT0004748	ADCY6	112	NM_015270	ADCY6	1	0	1	0	0	1	0	0	0	1	1	1	6
hsa-miR-423-5p	MIMAT0004748	ADD1	118	XM_005247936	ADD1	1	0	1	0	0	1	0	0	0	1	1	1	6
hsa-miR-423-5p	MIMAT0004748	ADH6	130	XM_005262731	ADH6	1	0	1	0	0	1	0	0	0	1	1	1	6
hsa-miR-423-5p	MIMAT0004748	ADH6	130	NM_001102470	ADH6	1	0	1	0	0	1	0	0	1	0	1	1	6
hsa-miR-423-5p	MIMAT0004748	AK1	203	NM_000476	AK1	1	0	1	0	0	1	0	0	1	0	1	1	6
hsa-miR-423-5p	MIMAT0004748	AK2	204	NM_013411	AK2	1	0	1	0	0	1	0	0	1	0	1	1	6
hsa-miR-423-5p	MIMAT0004748	AKT1	207	NM_005163	AKT1	1	0	1	0	0	1	0	0	0	1	1	1	6
hsa-miR-423-5p	MIMAT0004748	ALDOC	230	NM_005165	ALDOC	1	0	1	0	0	1	0	0	1	0	1	1	6
hsa-miR-423-5p	MIMAT0004748	AQP1	358	NM_001185062	AQP1	1	0	1	0	0	1	0	1	0	0	1	1	6
hsa-miR-423-5p	MIMAT0004748	AQP1	358	NM_001185060	AQP1	1	0	1	0	0	1	0	1	0	0	1	1	6
hsa-miR-423-5p	MIMAT0004748	AQP1	358	NM_001185061	AQP1	1	0	1	0	0	1	0	1	0	0	1	1	6
hsa-miR-423-5p	MIMAT0004748	ARF3	377	NM_001659	ARF3	1	0	1	0	0	1	0	0	1	0	1	1	6
hsa-miR-423-5p	MIMAT0004748	ARHGAP4	393	NM_001666	ARHGAP4	1	0	1	0	0	1	0	0	1	0	1	1	6
hsa-miR-423-5p	MIMAT0004748	ARHGDIA	396	NM_004309	ARHGDIA	1	0	1	0	0	1	0	0	1	0	1	1	6
hsa-miR-423-5p	MIMAT0004748	ARSB	411	NM_198709	ARSB	1	0	1	0	0	1	0	0	1	0	1	1	6
hsa-miR-423-5p	MIMAT0004748	ARSD	414	XM_005274515	ARSD	1	0	1	0	0	1	0	0	0	1	1	1	6
hsa-miR-423-5p	MIMAT0004748	ARSD	414	NM_001669	ARSD	1	0	1	0	0	1	0	0	1	0	1	1	6
hsa-miR-423-5p	MIMAT0004748	ASCL2	430	NM_005170	ASCL2	1	0	1	0	0	1	0	0	1	0	1	1	6
hsa-miR-423-5p	MIMAT0004748	ATP2B3	492	NM_021949	ATP2B3	1	0	1	0	0	1	0	0	1	0	1	1	6
hsa-miR-423-5p	MIMAT0004748	ATP6V0C	527	NM_001694	ATP6V0C	1	0	1	0	0	1	0	0	1	0	1	1	6
hsa-miR-423-5p	MIMAT0004748	ATP6V1C1	528	NM_001695	ATP6V1C1	1	0	1	0	0	0	0	0	1	1	1	1	6
hsa-miR-423-5p	MIMAT0004748	ATP6V1G2	534	NM_138282	ATP6V1G2	1	0	1	0	1	1	0	0	0	0	1	1	6
hsa-miR-423-5p	MIMAT0004748	ATP6V1G2	534	NM_001204078	ATP6V1G2	1	0	1	0	1	1	0	0	0	0	1	1	6
hsa-miR-423-5p	MIMAT0004748	ATRX	546	XM_005262155	ATRX	1	0	1	0	0	1	0	0	0	1	1	1	6
hsa-miR-423-5p	MIMAT0004748	ATRX	546	XM_005277815	ATRX	1	0	1	0	0	1	0	0	0	1	1	1	6
hsa-miR-423-5p	MIMAT0004748	AVPR2	554	NM_001146151	AVPR2	1	0	1	0	0	1	0	0	0	1	1	1	6
hsa-miR-423-5p	MIMAT0004748	AVPR2	554	NM_000054	AVPR2	1	0	1	0	0	1	0	0	1	0	1	1	6
hsa-miR-423-5p	MIMAT0004748	BCAT2	587	NM_001190	BCAT2	1	0	1	0	0	1	0	0	1	0	1	1	6
hsa-miR-423-5p	MIMAT0004748	BCKDHA	593	NM_000709	BCKDHA	1	0	1	0	0	1	0	0	1	0	1	1	6
hsa-miR-423-5p	MIMAT0004748	BCL2L1	598	NM_138578	BCL2L1	1	0	1	0	0	1	0	0	0	1	1	1	6
hsa-miR-423-5p	MIMAT0004748	BICD1	636	NM_001003398	BICD1	1	0	1	0	0	1	0	0	1	0	1	1	6
hsa-miR-423-5p	MIMAT0004748	C2	717	NM_000063	C2	1	0	1	0	0	1	0	0	0	1	1	1	6
hsa-miR-423-5p	MIMAT0004748	CAPN5	726	XM_005274206	CAPN5	1	0	1	0	0	1	0	0	0	1	1	1	6
hsa-miR-423-5p	MIMAT0004748	CAPN5	726	XM_005277729	CAPN5	1	0	1	0	0	1	0	0	0	1	1	1	6
hsa-miR-423-5p	MIMAT0004748	CAPN5	726	NM_004055	CAPN5	1	0	1	0	0	1	0	0	1	0	1	1	6
hsa-miR-423-5p	MIMAT0004748	MPPED2	744	NM_001145399	MPPED2	1	0	1	0	0	1	0	0	0	1	1	1	6
hsa-miR-423-5p	MIMAT0004748	MYRF	745	NM_013279	MYRF	1	0	1	0	0	1	0	0	1	0	1	1	6
hsa-miR-423-5p	MIMAT0004748	CACNA1S	779	NM_000069	CACNA1S	1	0	1	0	0	1	0	0	1	0	1	1	6
hsa-miR-423-5p	MIMAT0004748	DDR1	780	NM_013993	DDR1	1	0	1	0	0	1	0	0	0	1	1	1	6
hsa-miR-423-5p	MIMAT0004748	CAMK2B	816	NM_001220	CAMK2B	1	0	1	0	0	1	0	0	0	1	1	1	6
hsa-miR-423-5p	MIMAT0004748	CCBL1	883	XM_005252294	CCBL1	1	0	1	0	0	1	0	0	0	1	1	1	6
hsa-miR-423-5p	MIMAT0004748	CCBL1	883	NM_004059	CCBL1	1	0	1	0	0	1	0	0	1	0	1	1	6
hsa-miR-423-5p	MIMAT0004748	CD1C	911	NM_001765	CD1C	1	0	1	0	1	0	0	0	1	0	1	1	6
hsa-miR-423-5p	MIMAT0004748	CD4	920	NM_000616	CD4	1	0	1	0	0	1	0	0	1	0	1	1	6
hsa-miR-423-5p	MIMAT0004748	CD8A	925	NM_001145873	CD8A	1	0	1	0	0	1	0	0	0	1	1	1	6
hsa-miR-423-5p	MIMAT0004748	TNFRSF8	943	NM_001243	TNFRSF8	1	0	1	0	0	1	0	0	0	1	1	1	6
hsa-miR-423-5p	MIMAT0004748	CD44	960	NM_001202557	CD44	1	0	1	0	1	1	0	0	0	0	1	1	6
hsa-miR-423-5p	MIMAT0004748	CD151	977	NM_004357	CD151	1	0	1	0	0	1	0	0	0	1	1	1	6
hsa-miR-423-5p	MIMAT0004748	CDK6	1021	NM_001145306	CDK6	1	0	1	0	0	1	0	0	0	1	1	1	6
hsa-miR-423-5p	MIMAT0004748	CDK6	1021	NM_001259	CDK6	1	0	1	0	0	1	0	0	1	0	1	1	6
hsa-miR-423-5p	MIMAT0004748	CDKN1A	1026	NM_001220777	CDKN1A	1	0	1	0	1	1	0	0	0	0	1	1	6
hsa-miR-423-5p	MIMAT0004748	CDKN1A	1026	NM_078467	CDKN1A	1	0	1	0	1	1	0	0	0	0	1	1	6
hsa-miR-423-5p	MIMAT0004748	CDKN1A	1026	NM_000389	CDKN1A	1	0	1	0	1	1	0	0	0	0	1	1	6
hsa-miR-423-5p	MIMAT0004748	CEBPA	1050	NM_004364	CEBPA	0	0	1	0	0	1	0	0	1	1	1	1	6
hsa-miR-423-5p	MIMAT0004748	CHD3	1107	NM_005852	CHD3	1	0	1	0	0	1	0	1	0	0	1	1	6
hsa-miR-423-5p	MIMAT0004748	CHD3	1107	NM_001005273	CHD3	1	0	1	0	0	1	0	1	0	0	1	1	6
hsa-miR-423-5p	MIMAT0004748	CHD3	1107	NM_001005271	CHD3	1	0	1	0	0	1	0	1	0	0	1	1	6
hsa-miR-423-5p	MIMAT0004748	CHIT1	1118	NM_003465	CHIT1	1	0	1	0	0	1	0	0	1	0	1	1	6
hsa-miR-423-5p	MIMAT0004748	CHN2	1124	XM_005249597	CHN2	1	0	1	0	0	1	0	0	0	1	1	1	6
hsa-miR-423-5p	MIMAT0004748	CLCN7	1186	NM_001114331	CLCN7	1	0	1	0	1	1	0	0	0	0	1	1	6
hsa-miR-423-5p	MIMAT0004748	CLCNKA	1187	NM_004070	CLCNKA	1	0	1	0	0	1	0	0	0	1	1	1	6
hsa-miR-423-5p	MIMAT0004748	CLTB	1212	NM_007097	CLTB	1	0	1	0	0	1	0	0	0	1	1	1	6
hsa-miR-423-5p	MIMAT0004748	COL4A6	1288	XM_005262073	COL4A6	1	0	1	0	0	1	0	0	0	1	1	1	6
hsa-miR-423-5p	MIMAT0004748	COMT	1312	NM_000754	COMT	1	0	1	0	0	1	0	0	0	1	1	1	6
hsa-miR-423-5p	MIMAT0004748	CSNK1G2	1455	NM_001319	CSNK1G2	1	0	1	0	0	1	0	0	1	0	1	1	6
hsa-miR-423-5p	MIMAT0004748	SLC25A10	1468	NM_012140	SLC25A10	1	0	1	0	0	1	0	0	1	0	1	1	6
hsa-miR-423-5p	MIMAT0004748	CTNS	1497	NM_004937	CTNS	0	0	1	1	0	1	0	0	1	0	1	1	6
hsa-miR-423-5p	MIMAT0004748	CTSS	1520	NM_004079	CTSS	0	0	1	0	0	1	0	0	1	1	1	1	6
hsa-miR-423-5p	MIMAT0004748	CUX1	1523	NM_181552	CUX1	1	0	1	0	0	1	0	0	1	0	1	1	6
hsa-miR-423-5p	MIMAT0004748	CYB561	1534	XM_005257090	CYB561	1	0	1	0	0	1	0	0	0	1	1	1	6
hsa-miR-423-5p	MIMAT0004748	DAG1	1605	NM_001165928	DAG1	1	0	1	0	0	1	0	0	0	1	1	1	6
hsa-miR-423-5p	MIMAT0004748	DAG1	1605	NM_004393	DAG1	1	0	1	0	0	1	0	0	1	0	1	1	6
hsa-miR-423-5p	MIMAT0004748	DGKB	1607	NM_145695	DGKB	1	0	1	0	0	1	0	0	1	0	1	1	6
hsa-miR-423-5p	MIMAT0004748	DGKQ	1609	XM_005272264	DGKQ	1	0	1	0	0	1	0	0	0	1	1	1	6
hsa-miR-423-5p	MIMAT0004748	DGKQ	1609	NM_001347	DGKQ	1	0	1	0	0	1	0	0	1	0	1	1	6
hsa-miR-423-5p	MIMAT0004748	DRP2	1821	NM_001939	DRP2	0	0	1	0	0	1	0	0	1	1	1	1	6
hsa-miR-423-5p	MIMAT0004748	DUSP2	1844	XM_005263896	DUSP2	1	0	1	0	0	1	0	0	0	1	1	1	6
hsa-miR-423-5p	MIMAT0004748	DUSP2	1844	NM_004418	DUSP2	1	0	1	0	0	1	0	0	1	0	1	1	6
hsa-miR-423-5p	MIMAT0004748	DVL1	1855	XM_005244731	DVL1	1	0	1	0	0	1	0	0	0	1	1	1	6
hsa-miR-423-5p	MIMAT0004748	DYRK1A	1859	NM_130438	DYRK1A	1	0	1	0	1	1	0	0	0	0	1	1	6
hsa-miR-423-5p	MIMAT0004748	DYRK1A	1859	NM_101395	DYRK1A	1	0	1	0	1	1	0	0	0	0	1	1	6
hsa-miR-423-5p	MIMAT0004748	EGFR	1956	NM_201284	EGFR	1	0	1	0	0	1	0	0	1	0	1	1	6
hsa-miR-423-5p	MIMAT0004748	EGR3	1960	XM_005273425	EGR3	1	0	1	0	0	1	0	0	0	1	1	1	6
hsa-miR-423-5p	MIMAT0004748	EGR3	1960	NM_004430	EGR3	1	0	1	0	0	1	0	0	1	0	1	1	6
hsa-miR-423-5p	MIMAT0004748	EIF4A1	1973	NM_001204510	EIF4A1	1	0	1	0	0	1	0	1	0	0	1	1	6
hsa-miR-423-5p	MIMAT0004748	ELK1	2002	NM_005229	ELK1	0	0	1	0	0	1	0	1	1	0	1	1	6
hsa-miR-423-5p	MIMAT0004748	MARK2	2011	NM_001163297	MARK2	1	0	1	0	0	1	0	1	0	0	1	1	6
hsa-miR-423-5p	MIMAT0004748	MARK2	2011	NM_017490	MARK2	1	0	1	0	0	1	0	1	0	0	1	1	6
hsa-miR-423-5p	MIMAT0004748	MARK2	2011	NM_001163296	MARK2	1	0	1	0	0	1	0	1	0	0	1	1	6
hsa-miR-423-5p	MIMAT0004748	MARK2	2011	NM_004954	MARK2	1	0	1	0	0	1	0	1	0	0	1	1	6
hsa-miR-423-5p	MIMAT0004748	EMR1	2015	NM_001974	EMR1	0	0	1	0	0	1	0	0	1	1	1	1	6
hsa-miR-423-5p	MIMAT0004748	ESRRB	2103	NM_004452	ESRRB	0	0	1	0	0	1	0	0	1	1	1	1	6
hsa-miR-423-5p	MIMAT0004748	FANCC	2176	NM_000136	FANCC	0	0	1	0	0	1	0	0	1	1	1	1	6
hsa-miR-423-5p	MIMAT0004748	PTK2B	2185	NM_173174	PTK2B	1	0	1	0	0	1	0	0	0	1	1	1	6
hsa-miR-423-5p	MIMAT0004748	FOXM1	2305	NM_001243089	FOXM1	1	0	1	0	1	1	0	0	0	0	1	1	6
hsa-miR-423-5p	MIMAT0004748	FOXM1	2305	NM_001243088	FOXM1	1	0	1	0	1	1	0	0	0	0	1	1	6
hsa-miR-423-5p	MIMAT0004748	FOXM1	2305	NM_202003	FOXM1	1	0	1	0	1	1	0	0	0	0	1	1	6
hsa-miR-423-5p	MIMAT0004748	FOXM1	2305	NM_021953	FOXM1	1	0	1	0	1	1	0	0	0	0	1	1	6
hsa-miR-423-5p	MIMAT0004748	GABRA3	2556	NM_000808	GABRA3	0	0	1	0	0	1	0	1	1	0	1	1	6
hsa-miR-423-5p	MIMAT0004748	GABRE	2564	XM_005274661	GABRE	1	0	1	0	0	1	0	0	0	1	1	1	6
hsa-miR-423-5p	MIMAT0004748	GABRR2	2570	NM_002043	GABRR2	1	0	1	0	0	1	0	0	1	0	1	1	6
hsa-miR-423-5p	MIMAT0004748	GDNF	2668	NM_001190468	GDNF	1	0	1	0	0	1	0	0	0	1	1	1	6
hsa-miR-423-5p	MIMAT0004748	GFRA3	2676	NM_001496	GFRA3	1	0	1	0	0	1	0	0	1	0	1	1	6
hsa-miR-423-5p	MIMAT0004748	GNAI2	2771	NM_001166425	GNAI2	1	0	1	0	0	1	0	1	0	0	1	1	6
hsa-miR-423-5p	MIMAT0004748	GNAO1	2775	NM_020988	GNAO1	1	0	1	0	0	1	0	0	1	0	1	1	6
hsa-miR-423-5p	MIMAT0004748	GPR35	2859	NM_001195381	GPR35	1	0	1	0	0	1	0	0	0	1	1	1	6
hsa-miR-423-5p	MIMAT0004748	GPR35	2859	NM_005301	GPR35	1	0	1	0	0	1	0	0	1	0	1	1	6
hsa-miR-423-5p	MIMAT0004748	RAPGEF1	2889	XM_005272185	RAPGEF1	1	0	1	0	0	1	0	0	0	1	1	1	6
hsa-miR-423-5p	MIMAT0004748	GRM2	2912	NM_000839	GRM2	0	0	1	1	0	0	0	0	1	1	1	1	6
hsa-miR-423-5p	MIMAT0004748	GSS	2937	NM_000178	GSS	1	0	1	0	0	1	0	0	1	0	1	1	6
hsa-miR-423-5p	MIMAT0004748	GSTM4	2948	NM_000850	GSTM4	0	0	1	0	0	1	0	0	1	1	1	1	6
hsa-miR-423-5p	MIMAT0004748	GTF2E1	2960	NM_005513	GTF2E1	1	0	1	0	0	1	0	0	1	0	1	1	6
hsa-miR-423-5p	MIMAT0004748	GTF3C1	2975	NM_001520	GTF3C1	0	0	1	0	0	1	0	0	1	1	1	1	6
[truncated: 58,998 more rows]
