# Supplementary material for: Cross-platform genomic identification and clinical validation of breast cancer diagnostic biomarkers
Source: Aging (Albany NY). 2021 Jan 20;13(3):4258–73. doi: 10.18632/aging.202388 (PMC7906147; doi:10.18632/aging.202388)
Supplement: Supplementary Table 2 [file aging-13-202388-s003.xlsx]

## Sheet: hsa-miR-423-5p target lncRNA 
Supplementary Table 2. High confidential predicted hsa-miR-423-5p target lncRNA.
miRNA	MIMATid	LncRNA_EnsGeneID	LncRNA_EnsTransID	LncRNA_Transcript	LncRNA_Gene	miRWalk	miRanda	RNAhybrid	Targetscan	Sum
hsa-miR-423-5p	MIMAT0004748	ENSG00000204241	ENST00000527712	RP11-713P17.3-004	RP11-713P17.3	1	0	1	1	3
hsa-miR-423-5p	MIMAT0004748	ENSG00000231776	ENST00000454172	RP1-90L14.1-003	RP1-90L14.1	1	0	1	1	3
hsa-miR-423-5p	MIMAT0004748	ENSG00000235790	ENST00000588288	RP11-73M7.6-009	RP11-73M7.6	1	0	1	1	3
hsa-miR-423-5p	MIMAT0004748	ENSG00000228242	ENST00000626655	AC093495.4-007	AC093495.4	1	0	1	1	3
hsa-miR-423-5p	MIMAT0004748	ENSG00000279840	ENST00000624535	RP1-228P16.9-001	RP1-228P16.9	1	0	1	1	3
hsa-miR-423-5p	MIMAT0004748	ENSG00000280660	ENST00000630034	RP11-437J2.3-001	RP11-437J2.3	1	0	1	1	3
hsa-miR-423-5p	MIMAT0004748	ENSG00000237125	ENST00000507062	HAND2-AS1-009	HAND2-AS1	1	0	1	1	3
hsa-miR-423-5p	MIMAT0004748	ENSG00000229847	ENST00000440007	EMX2OS-001	EMX2OS	1	0	1	1	3
hsa-miR-423-5p	MIMAT0004748	ENSG00000233930	ENST00000424148	KRTAP5-AS1-001	KRTAP5-AS1	1	0	1	1	3
hsa-miR-423-5p	MIMAT0004748	ENSG00000254966	ENST00000527285	RP11-1081L13.4-001	RP11-1081L13.4	1	0	1	1	3
hsa-miR-423-5p	MIMAT0004748	ENSG00000231437	ENST00000438293	RP11-88H9.2-003	RP11-88H9.2	1	0	1	1	3
hsa-miR-423-5p	MIMAT0004748	ENSG00000258938	ENST00000555918	RP11-317N8.5-001	RP11-317N8.5	1	0	1	1	3
hsa-miR-423-5p	MIMAT0004748	ENSG00000237292	ENST00000435023	RP11-540K16.1-001	RP11-540K16.1	1	0	1	1	3
hsa-miR-423-5p	MIMAT0004748	ENSG00000260827	ENST00000565847	RP11-1437A8.4-002	RP11-1437A8.4	1	0	1	1	3
hsa-miR-423-5p	MIMAT0004748	ENSG00000225783	ENST00000620145	MIAT-001	MIAT	1	0	1	1	3
hsa-miR-423-5p	MIMAT0004748	ENSG00000255159	ENST00000533843	RP11-318C2.1-002	RP11-318C2.1	1	0	1	1	3
hsa-miR-423-5p	MIMAT0004748	ENSG00000267519	ENST00000587762	CTD-3252C9.4-001	CTD-3252C9.4	1	0	1	1	3
hsa-miR-423-5p	MIMAT0004748	ENSG00000162888	ENST00000367119	C1orf147-001	C1orf147	1	0	1	1	3
hsa-miR-423-5p	MIMAT0004748	ENSG00000263072	ENST00000576590	ZNF213-AS1-003	ZNF213-AS1	1	0	1	1	3
hsa-miR-423-5p	MIMAT0004748	ENSG00000227165	ENST00000451706	WDR11-AS1-002	WDR11-AS1	1	0	1	1	3
hsa-miR-423-5p	MIMAT0004748	ENSG00000259129	ENST00000557749	LINC00648-002	LINC00648	1	0	1	1	3
hsa-miR-423-5p	MIMAT0004748	ENSG00000265401	ENST00000583934	RP11-138I1.4-001	RP11-138I1.4	1	0	1	1	3
hsa-miR-423-5p	MIMAT0004748	ENSG00000237390	ENST00000451362	RP11-139I14.2-001	RP11-139I14.2	1	0	1	1	3
hsa-miR-423-5p	MIMAT0004748	ENSG00000248636	ENST00000537366	RP11-768F21.1-002	RP11-768F21.1	1	0	1	1	3
hsa-miR-423-5p	MIMAT0004748	ENSG00000230212	ENST00000415147	AP000688.14-001	AP000688.14	1	0	1	1	3
hsa-miR-423-5p	MIMAT0004748	ENSG00000236276	ENST00000435093	NDP-AS1-001	NDP-AS1	1	0	1	1	3
hsa-miR-423-5p	MIMAT0004748	ENSG00000263624	ENST00000584203	RP11-45M22.3-001	RP11-45M22.3	1	0	1	1	3
hsa-miR-423-5p	MIMAT0004748	ENSG00000260482	ENST00000566996	CTD-2196E14.9-001	CTD-2196E14.9	1	0	1	1	3
hsa-miR-423-5p	MIMAT0004748	ENSG00000174365	ENST00000400436	SNHG11-007	SNHG11	1	0	1	1	3
hsa-miR-423-5p	MIMAT0004748	ENSG00000272512	ENST00000606034	RP11-54O7.17-001	RP11-54O7.17	1	0	1	1	3
hsa-miR-423-5p	MIMAT0004748	ENSG00000227372	ENST00000423764	TP73-AS1-001	TP73-AS1	1	0	1	1	3
hsa-miR-423-5p	MIMAT0004748	ENSG00000253982	ENST00000518822	CTD-2336O2.1-001	CTD-2336O2.1	1	0	1	1	3
hsa-miR-423-5p	MIMAT0004748	ENSG00000235790	ENST00000623425	RP11-73M7.6-021	RP11-73M7.6	1	0	1	1	3
hsa-miR-423-5p	MIMAT0004748	ENSG00000267255	ENST00000590159	CTB-50L17.5-001	CTB-50L17.5	1	0	1	1	3
hsa-miR-423-5p	MIMAT0004748	ENSG00000234684	ENST00000446423	SDCBP2-AS1-001	SDCBP2-AS1	1	0	1	1	3
hsa-miR-423-5p	MIMAT0004748	ENSG00000257958	ENST00000548488	RP11-25E2.1-001	RP11-25E2.1	1	0	1	1	3
hsa-miR-423-5p	MIMAT0004748	ENSG00000177234	ENST00000623529	LINC01561-201	LINC01561	1	0	1	1	3
hsa-miR-423-5p	MIMAT0004748	ENSG00000267943	ENST00000596769	CTD-2620I22.3-001	CTD-2620I22.3	1	0	1	1	3
hsa-miR-423-5p	MIMAT0004748	ENSG00000278385	ENST00000622535	RP11-89H19.2-001	RP11-89H19.2	1	0	1	1	3
hsa-miR-423-5p	MIMAT0004748	ENSG00000266805	ENST00000580891	RP11-61L19.1-001	RP11-61L19.1	1	0	1	1	3
hsa-miR-423-5p	MIMAT0004748	ENSG00000269958	ENST00000602422	RP11-73M18.8-001	RP11-73M18.8	1	0	1	1	3
hsa-miR-423-5p	MIMAT0004748	ENSG00000215498	ENST00000415376	FAM230B-001	FAM230B	1	0	1	1	3
hsa-miR-423-5p	MIMAT0004748	ENSG00000233339	ENST00000419904	AC018878.3-001	AC018878.3	1	0	1	1	3
hsa-miR-423-5p	MIMAT0004748	ENSG00000281450	ENST00000629595	PANDAR-001	PANDAR	1	0	1	1	3
hsa-miR-423-5p	MIMAT0004748	ENSG00000254363	ENST00000607850	CTB-131B5.5-002	CTB-131B5.5	1	0	1	1	3
hsa-miR-423-5p	MIMAT0004748	ENSG00000259604	ENST00000559673	RP11-66B24.1-003	RP11-66B24.1	1	0	1	1	3
hsa-miR-423-5p	MIMAT0004748	ENSG00000253106	ENST00000518639	RP11-158K1.3-001	RP11-158K1.3	1	0	1	1	3
hsa-miR-423-5p	MIMAT0004748	ENSG00000263146	ENST00000583511	RP11-849I19.1-004	RP11-849I19.1	1	0	1	1	3
hsa-miR-423-5p	MIMAT0004748	ENSG00000277151	ENST00000617901	RP11-380B4.3-001	RP11-380B4.3	1	0	1	1	3
hsa-miR-423-5p	MIMAT0004748	ENSG00000225208	ENST00000442188	RP11-107I14.2-001	RP11-107I14.2	1	0	1	1	3
hsa-miR-423-5p	MIMAT0004748	ENSG00000265485	ENST00000577994	RP11-449D8.1-001	RP11-449D8.1	1	0	1	1	3
hsa-miR-423-5p	MIMAT0004748	ENSG00000231074	ENST00000602290	HCG18-016	HCG18	1	0	1	1	3
hsa-miR-423-5p	MIMAT0004748	ENSG00000253301	ENST00000519314	RP11-513O17.2-002	RP11-513O17.2	1	0	1	1	3
hsa-miR-423-5p	MIMAT0004748	ENSG00000227398	ENST00000429315	KIF9-AS1-001	KIF9-AS1	1	0	1	1	3
hsa-miR-423-5p	MIMAT0004748	ENSG00000247796	ENST00000499459	CTD-2366F13.1-002	CTD-2366F13.1	1	0	1	1	3
hsa-miR-423-5p	MIMAT0004748	ENSG00000259280	ENST00000561259	RP11-122D10.1-001	RP11-122D10.1	1	0	1	1	3
hsa-miR-423-5p	MIMAT0004748	ENSG00000266176	ENST00000580729	RP11-855A2.5-001	RP11-855A2.5	1	0	1	1	3
hsa-miR-423-5p	MIMAT0004748	ENSG00000232451	ENST00000421581	AC016768.1-001	AC016768.1	1	0	1	1	3
hsa-miR-423-5p	MIMAT0004748	ENSG00000237556	ENST00000419258	KCND3-AS1-003	KCND3-AS1	1	0	1	1	3
hsa-miR-423-5p	MIMAT0004748	ENSG00000258017	ENST00000547387	RP11-386G11.10-003	RP11-386G11.10	1	0	1	1	3
hsa-miR-423-5p	MIMAT0004748	ENSG00000262001	ENST00000572856	DLGAP1-AS2-001	DLGAP1-AS2	1	0	1	1	3
hsa-miR-423-5p	MIMAT0004748	ENSG00000255571	ENST00000561327	LINC00925-007	LINC00925	1	0	1	1	3
hsa-miR-423-5p	MIMAT0004748	ENSG00000235201	ENST00000456032	RP11-127L21.1-001	RP11-127L21.1	1	0	1	1	3
hsa-miR-423-5p	MIMAT0004748	ENSG00000268038	ENST00000598042	AC011516.2-001	AC011516.2	1	0	1	1	3
hsa-miR-423-5p	MIMAT0004748	ENSG00000249231	ENST00000510238	CASC16-001	CASC16	1	0	1	1	3
hsa-miR-423-5p	MIMAT0004748	ENSG00000227036	ENST00000581549	LINC00511-018	LINC00511	1	0	1	1	3
hsa-miR-423-5p	MIMAT0004748	ENSG00000246331	ENST00000500076	RP11-77I22.2-001	RP11-77I22.2	1	0	1	1	3
hsa-miR-423-5p	MIMAT0004748	ENSG00000258999	ENST00000557775	RP11-114N19.3-001	RP11-114N19.3	1	0	1	1	3
hsa-miR-423-5p	MIMAT0004748	ENSG00000233360	ENST00000456099	Z83844.1-001	Z83844.1	1	0	1	1	3
hsa-miR-423-5p	MIMAT0004748	ENSG00000260876	ENST00000568751	LINC01229-003	LINC01229	1	0	1	1	3
hsa-miR-423-5p	MIMAT0004748	ENSG00000272994	ENST00000610036	RP11-332H14.2-001	RP11-332H14.2	1	0	1	1	3
hsa-miR-423-5p	MIMAT0004748	ENSG00000227946	ENST00000420509	AC007383.3-001	AC007383.3	1	0	1	1	3
hsa-miR-423-5p	MIMAT0004748	ENSG00000248445	ENST00000514214	SEMA6A-AS1-005	SEMA6A-AS1	1	0	1	1	3
hsa-miR-423-5p	MIMAT0004748	ENSG00000225855	ENST00000446880	RUSC1-AS1-001	RUSC1-AS1	1	0	1	1	3
hsa-miR-423-5p	MIMAT0004748	ENSG00000222022	ENST00000409162	AC112721.1-001	AC112721.1	1	0	1	1	3
hsa-miR-423-5p	MIMAT0004748	ENSG00000197099	ENST00000628253	RP11-573D15.8-036	RP11-573D15.8	1	0	1	1	3
hsa-miR-423-5p	MIMAT0004748	ENSG00000256315	ENST00000540545	AP000462.1-003	AP000462.1	1	0	1	1	3
hsa-miR-423-5p	MIMAT0004748	ENSG00000231721	ENST00000423414	LINC-PINT-004	LINC-PINT	1	0	1	1	3
hsa-miR-423-5p	MIMAT0004748	ENSG00000273214	ENST00000609265	RP5-1039K5.18-001	RP5-1039K5.18	1	0	1	1	3
hsa-miR-423-5p	MIMAT0004748	ENSG00000214043	ENST00000545767	RP5-944M2.3-004	RP5-944M2.3	1	0	1	1	3
hsa-miR-423-5p	MIMAT0004748	ENSG00000277837	ENST00000620778	RP11-714M23.2-001	RP11-714M23.2	1	0	1	1	3
hsa-miR-423-5p	MIMAT0004748	ENSG00000235050	ENST00000590739	MLIP-AS1-005	MLIP-AS1	1	0	1	1	3
hsa-miR-423-5p	MIMAT0004748	ENSG00000204623	ENST00000444051	ZNRD1-AS1-008	ZNRD1-AS1	1	0	1	1	3
hsa-miR-423-5p	MIMAT0004748	ENSG00000251331	ENST00000510780	RP11-689K5.3-003	RP11-689K5.3	1	0	1	1	3
hsa-miR-423-5p	MIMAT0004748	ENSG00000262075	ENST00000573103	DKFZP434A062-001	DKFZP434A062	1	0	1	1	3
hsa-miR-423-5p	MIMAT0004748	ENSG00000279907	ENST00000624587	RP11-568J23.2-001	RP11-568J23.2	1	0	1	1	3
hsa-miR-423-5p	MIMAT0004748	ENSG00000186615	ENST00000554558	KTN1-AS1-004	KTN1-AS1	1	0	1	1	3
hsa-miR-423-5p	MIMAT0004748	ENSG00000249859	ENST00000504719	PVT1-005	PVT1	1	0	1	1	3
hsa-miR-423-5p	MIMAT0004748	ENSG00000255648	ENST00000536931	RP11-361I14.2-001	RP11-361I14.2	1	0	1	1	3
hsa-miR-423-5p	MIMAT0004748	ENSG00000280837	ENST00000628368	CPS1-IT1-001	CPS1-IT1	1	0	1	1	3
hsa-miR-423-5p	MIMAT0004748	ENSG00000259458	ENST00000560347	MGC15885-002	MGC15885	1	0	1	1	3
hsa-miR-423-5p	MIMAT0004748	ENSG00000279422	ENST00000624313	RP11-641J8.1-001	RP11-641J8.1	1	0	1	1	3
hsa-miR-423-5p	MIMAT0004748	ENSG00000272109	ENST00000606656	CTD-2260A17.3-002	CTD-2260A17.3	1	0	1	1	3
hsa-miR-423-5p	MIMAT0004748	ENSG00000231535	ENST00000444263	LINC00278-002	LINC00278	1	0	1	1	3
hsa-miR-423-5p	MIMAT0004748	ENSG00000198468	ENST00000426161	FLVCR1-AS1-002	FLVCR1-AS1	1	0	1	1	3
hsa-miR-423-5p	MIMAT0004748	ENSG00000232073	ENST00000434741	RP1-302D9.3-001	RP1-302D9.3	1	0	1	1	3
hsa-miR-423-5p	MIMAT0004748	ENSG00000224863	ENST00000416581	LINC01398-001	LINC01398	1	0	1	1	3
hsa-miR-423-5p	MIMAT0004748	ENSG00000257497	ENST00000547326	RP11-585P4.5-001	RP11-585P4.5	1	0	1	1	3
hsa-miR-423-5p	MIMAT0004748	ENSG00000258511	ENST00000557072	RP11-61O1.2-001	RP11-61O1.2	1	0	1	1	3
hsa-miR-423-5p	MIMAT0004748	ENSG00000225261	ENST00000431993	RP5-937E21.8-001	RP5-937E21.8	1	0	1	1	3
hsa-miR-423-5p	MIMAT0004748	ENSG00000280231	ENST00000624488	LA16c-380F5.3-001	LA16c-380F5.3	1	0	1	1	3
hsa-miR-423-5p	MIMAT0004748	ENSG00000259178	ENST00000558343	CTD-2184D3.3-001	CTD-2184D3.3	1	0	1	1	3
hsa-miR-423-5p	MIMAT0004748	ENSG00000228137	ENST00000444966	AP001469.7-001	AP001469.7	1	0	1	1	3
hsa-miR-423-5p	MIMAT0004748	ENSG00000258702	ENST00000555496	RP11-433J8.1-001	RP11-433J8.1	1	0	1	1	3
hsa-miR-423-5p	MIMAT0004748	ENSG00000255433	ENST00000532274	AP000479.1-003	AP000479.1	1	0	1	1	3
hsa-miR-423-5p	MIMAT0004748	ENSG00000247844	ENST00000500112	CCAT1-001	CCAT1	1	0	1	1	3
hsa-miR-423-5p	MIMAT0004748	ENSG00000187621	ENST00000352367	TCL6-006	TCL6	1	0	1	1	3
hsa-miR-423-5p	MIMAT0004748	ENSG00000260742	ENST00000567327	RP11-366L5.1-001	RP11-366L5.1	1	0	1	1	3
hsa-miR-423-5p	MIMAT0004748	ENSG00000279930	ENST00000624543	LA16c-312E8.4-001	LA16c-312E8.4	1	0	1	1	3
hsa-miR-423-5p	MIMAT0004748	ENSG00000177738	ENST00000314957	CTD-2201E18.3-001	CTD-2201E18.3	1	0	1	1	3
hsa-miR-423-5p	MIMAT0004748	ENSG00000226956	ENST00000416641	AP000432.2-001	AP000432.2	1	0	1	1	3
hsa-miR-423-5p	MIMAT0004748	ENSG00000233178	ENST00000592778	RP11-88I18.2-003	RP11-88I18.2	1	0	1	1	3
hsa-miR-423-5p	MIMAT0004748	ENSG00000227733	ENST00000496508	RP4-565E6.1-004	RP4-565E6.1	1	0	1	1	3
hsa-miR-423-5p	MIMAT0004748	ENSG00000274220	ENST00000621929	RP11-77K12.9-001	RP11-77K12.9	1	0	1	1	3
hsa-miR-423-5p	MIMAT0004748	ENSG00000279440	ENST00000623027	CTA-992D9.11-001	CTA-992D9.11	1	0	1	1	3
hsa-miR-423-5p	MIMAT0004748	ENSG00000246465	ENST00000501520	RP11-57A19.2-001	RP11-57A19.2	1	0	1	1	3
hsa-miR-423-5p	MIMAT0004748	ENSG00000259053	ENST00000555070	RP11-33N16.3-001	RP11-33N16.3	1	0	1	1	3
hsa-miR-423-5p	MIMAT0004748	ENSG00000224066	ENST00000421616	RP4-622L5.7-001	RP4-622L5.7	1	0	1	1	3
hsa-miR-423-5p	MIMAT0004748	ENSG00000196295	ENST00000621272	AC005154.6-027	AC005154.6	1	0	1	1	3
hsa-miR-423-5p	MIMAT0004748	ENSG00000268670	ENST00000600056	CTD-2622I13.3-001	CTD-2622I13.3	1	0	1	1	3
hsa-miR-423-5p	MIMAT0004748	ENSG00000198788	ENST00000361558	MUC2-001	MUC2	1	0	1	1	3
hsa-miR-423-5p	MIMAT0004748	ENSG00000248508	ENST00000504245	SRP14-AS1-001	SRP14-AS1	1	0	1	1	3
hsa-miR-423-5p	MIMAT0004748	ENSG00000274766	ENST00000455857	LINC00453-001	LINC00453	1	0	1	1	3
hsa-miR-423-5p	MIMAT0004748	ENSG00000180539	ENST00000623196	C9orf139-001	C9orf139	1	0	1	1	3
hsa-miR-423-5p	MIMAT0004748	ENSG00000230937	ENST00000419143	MIR205HG-006	MIR205HG	1	0	1	1	3
hsa-miR-423-5p	MIMAT0004748	ENSG00000263345	ENST00000573007	RP1-59D14.5-001	RP1-59D14.5	1	0	1	1	3
hsa-miR-423-5p	MIMAT0004748	ENSG00000234912	ENST00000366365	SNHG20-002	SNHG20	1	0	1	1	3
hsa-miR-423-5p	MIMAT0004748	ENSG00000250358	ENST00000507565	RP11-159K7.2-003	RP11-159K7.2	1	0	1	1	3
hsa-miR-423-5p	MIMAT0004748	ENSG00000227218	ENST00000587355	RP11-203J24.8-006	RP11-203J24.8	1	0	1	1	3
hsa-miR-423-5p	MIMAT0004748	ENSG00000242686	ENST00000489312	RP11-1191J2.2-002	RP11-1191J2.2	1	0	1	1	3
hsa-miR-423-5p	MIMAT0004748	ENSG00000254630	ENST00000530435	CTD-2530H12.7-001	CTD-2530H12.7	1	0	1	1	3
hsa-miR-423-5p	MIMAT0004748	ENSG00000259831	ENST00000569854	LINC00567-001	LINC00567	1	0	1	1	3
hsa-miR-423-5p	MIMAT0004748	ENSG00000279773	ENST00000624520	AL050303.10-001	AL050303.10	1	0	1	1	3
hsa-miR-423-5p	MIMAT0004748	ENSG00000260575	ENST00000562604	RP11-56L13.7-001	RP11-56L13.7	1	0	1	1	3
hsa-miR-423-5p	MIMAT0004748	ENSG00000175699	ENST00000444118	LINC00521-003	LINC00521	1	0	1	1	3
hsa-miR-423-5p	MIMAT0004748	ENSG00000263821	ENST00000583306	RP11-527H14.1-001	RP11-527H14.1	1	0	1	1	3
hsa-miR-423-5p	MIMAT0004748	ENSG00000280419	ENST00000623341	RP11-178L8.6-001	RP11-178L8.6	1	0	1	1	3
hsa-miR-423-5p	MIMAT0004748	ENSG00000227498	ENST00000442567	AC018359.3-001	AC018359.3	1	0	1	1	3
hsa-miR-423-5p	MIMAT0004748	ENSG00000237054	ENST00000587245	PRMT5-AS1-005	PRMT5-AS1	1	0	1	1	3
hsa-miR-423-5p	MIMAT0004748	ENSG00000247982	ENST00000613170	LINC00926-004	LINC00926	1	0	1	1	3
hsa-miR-423-5p	MIMAT0004748	ENSG00000261254	ENST00000564623	RP4-714D9.5-001	RP4-714D9.5	1	0	1	1	3
hsa-miR-423-5p	MIMAT0004748	ENSG00000254872	ENST00000534584	RP13-870H17.3-001	RP13-870H17.3	1	0	1	1	3
hsa-miR-423-5p	MIMAT0004748	ENSG00000215190	ENST00000418368	LINC00680-004	LINC00680	1	0	1	1	3
hsa-miR-423-5p	MIMAT0004748	ENSG00000232530	ENST00000447565	RP1-102K2.6-001	RP1-102K2.6	1	0	1	1	3
hsa-miR-423-5p	MIMAT0004748	ENSG00000267291	ENST00000589557	CTB-186G2.1-001	CTB-186G2.1	1	0	1	1	3
hsa-miR-423-5p	MIMAT0004748	ENSG00000231346	ENST00000453988	LINC01160-003	LINC01160	1	0	1	1	3
hsa-miR-423-5p	MIMAT0004748	ENSG00000264527	ENST00000584807	WI2-1959D15.1-001	WI2-1959D15.1	1	0	1	1	3
hsa-miR-423-5p	MIMAT0004748	ENSG00000223839	ENST00000590863	FAM95B1-004	FAM95B1	1	0	1	1	3
hsa-miR-423-5p	MIMAT0004748	ENSG00000237187	ENST00000607831	NR2F1-AS1-006	NR2F1-AS1	1	0	1	1	3
hsa-miR-423-5p	MIMAT0004748	ENSG00000226673	ENST00000427276	LINC01108-001	LINC01108	1	0	1	1	3
hsa-miR-423-5p	MIMAT0004748	ENSG00000218537	ENST00000406213	MIF-AS1-001	MIF-AS1	1	0	1	1	3
hsa-miR-423-5p	MIMAT0004748	ENSG00000272155	ENST00000606067	RP11-707M3.3-001	RP11-707M3.3	1	0	1	1	3
hsa-miR-423-5p	MIMAT0004748	ENSG00000280120	ENST00000625082	RP11-546D6.3-001	RP11-546D6.3	1	0	1	1	3
hsa-miR-423-5p	MIMAT0004748	ENSG00000253686	ENST00000517733	LINC01484-002	LINC01484	1	0	1	1	3
hsa-miR-423-5p	MIMAT0004748	ENSG00000250133	ENST00000604081	HOXC-AS2-002	HOXC-AS2	1	0	1	1	3
hsa-miR-423-5p	MIMAT0004748	ENSG00000242136	ENST00000495580	RP11-734K21.2-001	RP11-734K21.2	1	0	1	1	3
hsa-miR-423-5p	MIMAT0004748	ENSG00000258556	ENST00000554773	CTD-2568P8.1-001	CTD-2568P8.1	1	0	1	1	3
hsa-miR-423-5p	MIMAT0004748	ENSG00000260402	ENST00000566232	RP11-56L13.1-001	RP11-56L13.1	1	0	1	1	3
hsa-miR-423-5p	MIMAT0004748	ENSG00000197585	ENST00000437883	AC107218.3-001	AC107218.3	1	0	1	1	3
hsa-miR-423-5p	MIMAT0004748	ENSG00000225315	ENST00000439239	RP11-293P20.2-001	RP11-293P20.2	1	0	1	1	3
hsa-miR-423-5p	MIMAT0004748	ENSG00000250379	ENST00000512295	RP11-23P13.4-002	RP11-23P13.4	1	0	1	1	3
hsa-miR-423-5p	MIMAT0004748	ENSG00000256540	ENST00000537295	RP11-598F7.6-001	RP11-598F7.6	1	0	1	1	3
hsa-miR-423-5p	MIMAT0004748	ENSG00000204049	ENST00000372387	RP11-126H7.4-001	RP11-126H7.4	1	0	1	1	3
hsa-miR-423-5p	MIMAT0004748	ENSG00000259221	ENST00000559799	CTD-2050N2.1-001	CTD-2050N2.1	1	0	1	1	3
hsa-miR-423-5p	MIMAT0004748	ENSG00000265794	ENST00000581915	RP11-227G15.3-001	RP11-227G15.3	1	0	1	1	3
hsa-miR-423-5p	MIMAT0004748	ENSG00000214548	ENST00000412736	MEG3-012	MEG3	1	0	1	1	3
hsa-miR-423-5p	MIMAT0004748	ENSG00000271538	ENST00000605270	RP11-326I11.4-001	RP11-326I11.4	1	0	1	1	3
hsa-miR-423-5p	MIMAT0004748	ENSG00000249738	ENST00000521472	AC008697.1-002	AC008697.1	1	0	1	1	3
hsa-miR-423-5p	MIMAT0004748	ENSG00000176349	ENST00000480694	AC110781.3-002	AC110781.3	1	0	1	1	3
hsa-miR-423-5p	MIMAT0004748	ENSG00000235106	ENST00000603928	LINC00094-005	LINC00094	1	0	1	1	3
hsa-miR-423-5p	MIMAT0004748	ENSG00000227527	ENST00000436207	RP11-223A3.1-001	RP11-223A3.1	1	0	1	1	3
hsa-miR-423-5p	MIMAT0004748	ENSG00000261286	ENST00000565700	RP11-517C16.2-001	RP11-517C16.2	1	0	1	1	3
hsa-miR-423-5p	MIMAT0004748	ENSG00000271936	ENST00000606114	RP11-443B20.1-001	RP11-443B20.1	1	0	1	1	3
hsa-miR-423-5p	MIMAT0004748	ENSG00000178803	ENST00000412790	ADORA2A-AS1-002	ADORA2A-AS1	1	0	1	1	3
hsa-miR-423-5p	MIMAT0004748	ENSG00000225756	ENST00000425189	DBH-AS1-001	DBH-AS1	1	0	1	1	3
hsa-miR-423-5p	MIMAT0004748	ENSG00000231943	ENST00000450636	PGM5P4-AS1-002	PGM5P4-AS1	1	0	1	1	3
hsa-miR-423-5p	MIMAT0004748	ENSG00000261467	ENST00000567919	RP11-731K22.1-001	RP11-731K22.1	1	0	1	1	3
hsa-miR-423-5p	MIMAT0004748	ENSG00000251615	ENST00000505448	RP11-774O3.3-001	RP11-774O3.3	1	0	1	1	3
hsa-miR-423-5p	MIMAT0004748	ENSG00000255117	ENST00000528119	RP5-1027O15.1-002	RP5-1027O15.1	1	0	1	1	3
hsa-miR-423-5p	MIMAT0004748	ENSG00000254486	ENST00000531559	RP13-631K18.2-001	RP13-631K18.2	1	0	1	1	3
hsa-miR-423-5p	MIMAT0004748	ENSG00000230138	ENST00000449958	RP11-117D22.2-001	RP11-117D22.2	1	0	1	1	3
hsa-miR-423-5p	MIMAT0004748	ENSG00000270823	ENST00000604666	RP11-2E11.6-001	RP11-2E11.6	1	0	1	1	3
hsa-miR-423-5p	MIMAT0004748	ENSG00000272449	ENST00000606645	RP3-395M20.12-001	RP3-395M20.12	1	0	1	1	3
hsa-miR-423-5p	MIMAT0004748	ENSG00000260426	ENST00000569431	RP5-912I13.1-001	RP5-912I13.1	1	0	1	1	3
hsa-miR-423-5p	MIMAT0004748	ENSG00000267629	ENST00000586064	AC138430.4-001	AC138430.4	1	0	1	1	3
hsa-miR-423-5p	MIMAT0004748	ENSG00000277559	ENST00000616682	RP11-434E6.4-001	RP11-434E6.4	1	0	1	1	3
hsa-miR-423-5p	MIMAT0004748	ENSG00000261126	ENST00000564686	RP11-795F19.1-002	RP11-795F19.1	1	0	1	1	3
hsa-miR-423-5p	MIMAT0004748	ENSG00000254690	ENST00000525023	GS1-393G12.12-001	GS1-393G12.12	1	0	1	1	3
hsa-miR-423-5p	MIMAT0004748	ENSG00000271646	ENST00000605834	RP11-326I11.3-001	RP11-326I11.3	1	0	1	1	3
hsa-miR-423-5p	MIMAT0004748	ENSG00000185186	ENST00000441283	LINC00313-007	LINC00313	1	0	1	1	3
hsa-miR-423-5p	MIMAT0004748	ENSG00000233077	ENST00000441214	LINC01271-001	LINC01271	1	0	1	1	3
hsa-miR-423-5p	MIMAT0004748	ENSG00000176753	ENST00000623360	C15orf56-001	C15orf56	1	0	1	1	3
hsa-miR-423-5p	MIMAT0004748	ENSG00000235138	ENST00000412181	RP11-374P20.4-001	RP11-374P20.4	1	0	1	1	3
hsa-miR-423-5p	MIMAT0004748	ENSG00000264007	ENST00000582367	RP11-68I3.10-001	RP11-68I3.10	1	0	1	1	3
hsa-miR-423-5p	MIMAT0004748	ENSG00000259370	ENST00000558404	RP11-1069G10.1-001	RP11-1069G10.1	1	0	1	1	3
hsa-miR-423-5p	MIMAT0004748	ENSG00000279338	ENST00000624184	RP1-309I22.2-001	RP1-309I22.2	1	0	1	1	3
hsa-miR-423-5p	MIMAT0004748	ENSG00000234789	ENST00000455074	RP11-483H20.4-001	RP11-483H20.4	1	0	1	1	3
hsa-miR-423-5p	MIMAT0004748	ENSG00000262319	ENST00000573168	CTC-457L16.2-001	CTC-457L16.2	1	0	1	1	3
hsa-miR-423-5p	MIMAT0004748	ENSG00000271970	ENST00000607635	RP3-337H4.10-001	RP3-337H4.10	1	0	1	1	3
hsa-miR-423-5p	MIMAT0004748	ENSG00000246100	ENST00000499809	LINC00900-001	LINC00900	1	0	1	1	3
hsa-miR-423-5p	MIMAT0004748	ENSG00000253554	ENST00000520365	RP11-32K4.1-003	RP11-32K4.1	1	0	1	1	3
hsa-miR-423-5p	MIMAT0004748	ENSG00000240710	ENST00000453895	RP11-430C7.4-001	RP11-430C7.4	1	0	1	1	3
hsa-miR-423-5p	MIMAT0004748	ENSG00000268938	ENST00000597837	AC005387.3-001	AC005387.3	1	0	1	1	3
hsa-miR-423-5p	MIMAT0004748	ENSG00000235621	ENST00000416742	LINC00494-004	LINC00494	1	0	1	1	3
hsa-miR-423-5p	MIMAT0004748	ENSG00000279026	ENST00000623547	RP3-414A15.12-001	RP3-414A15.12	1	0	1	1	3
hsa-miR-423-5p	MIMAT0004748	ENSG00000234394	ENST00000414223	RP11-561O23.5-002	RP11-561O23.5	1	0	1	1	3
hsa-miR-423-5p	MIMAT0004748	ENSG00000258601	ENST00000557642	RP11-81F13.2-001	RP11-81F13.2	1	0	1	1	3
hsa-miR-423-5p	MIMAT0004748	ENSG00000263574	ENST00000583854	CTD-2532D12.4-001	CTD-2532D12.4	1	0	1	1	3
hsa-miR-423-5p	MIMAT0004748	ENSG00000260460	ENST00000564032	RP11-284F21.8-001	RP11-284F21.8	1	0	1	1	3
hsa-miR-423-5p	MIMAT0004748	ENSG00000267646	ENST00000589227	CTC-499B15.7-001	CTC-499B15.7	1	0	1	1	3
hsa-miR-423-5p	MIMAT0004748	ENSG00000280321	ENST00000623261	RP11-1110F20.1-001	RP11-1110F20.1	1	0	1	1	3
hsa-miR-423-5p	MIMAT0004748	ENSG00000260461	ENST00000568017	RP11-541N10.3-001	RP11-541N10.3	1	0	1	1	3
hsa-miR-423-5p	MIMAT0004748	ENSG00000204241	ENST00000529070	RP11-713P17.3-002	RP11-713P17.3	1	0	1	1	3
hsa-miR-423-5p	MIMAT0004748	ENSG00000231776	ENST00000454981	RP1-90L14.1-001	RP1-90L14.1	1	0	1	1	3
hsa-miR-423-5p	MIMAT0004748	ENSG00000269524	ENST00000601161	CTB-83J4.1-001	CTB-83J4.1	1	0	1	1	3
hsa-miR-423-5p	MIMAT0004748	ENSG00000279179	ENST00000624339	RP11-131M11.3-001	RP11-131M11.3	1	0	1	1	3
hsa-miR-423-5p	MIMAT0004748	ENSG00000235790	ENST00000589462	RP11-73M7.6-005	RP11-73M7.6	1	0	1	1	3
hsa-miR-423-5p	MIMAT0004748	ENSG00000228242	ENST00000627116	AC093495.4-014	AC093495.4	1	0	1	1	3
hsa-miR-423-5p	MIMAT0004748	ENSG00000271736	ENST00000607010	RP11-85G21.3-001	RP11-85G21.3	1	0	1	1	3
hsa-miR-423-5p	MIMAT0004748	ENSG00000279841	ENST00000624151	RP11-274A11.4-001	RP11-274A11.4	1	0	1	1	3
hsa-miR-423-5p	MIMAT0004748	ENSG00000249786	ENST00000608408	EAF1-AS1-014	EAF1-AS1	1	0	1	1	3
hsa-miR-423-5p	MIMAT0004748	ENSG00000266718	ENST00000581360	RP11-466A19.1-001	RP11-466A19.1	1	0	1	1	3
hsa-miR-423-5p	MIMAT0004748	ENSG00000226476	ENST00000439156	RP11-776H12.1-001	RP11-776H12.1	1	0	1	1	3
hsa-miR-423-5p	MIMAT0004748	ENSG00000232645	ENST00000442440	LINC01431-001	LINC01431	1	0	1	1	3
hsa-miR-423-5p	MIMAT0004748	ENSG00000231437	ENST00000442751	RP11-88H9.2-001	RP11-88H9.2	1	0	1	1	3
hsa-miR-423-5p	MIMAT0004748	ENSG00000223946	ENST00000412701	RP11-533O20.2-001	RP11-533O20.2	1	0	1	1	3
hsa-miR-423-5p	MIMAT0004748	ENSG00000237292	ENST00000438428	RP11-540K16.1-002	RP11-540K16.1	1	0	1	1	3
hsa-miR-423-5p	MIMAT0004748	ENSG00000260830	ENST00000565098	RP11-524O1.4-001	RP11-524O1.4	1	0	1	1	3
hsa-miR-423-5p	MIMAT0004748	ENSG00000272933	ENST00000607967	RP11-47A8.5-001	RP11-47A8.5	1	0	1	1	3
hsa-miR-423-5p	MIMAT0004748	ENSG00000281392	ENST00000628435	LINC00506-002	LINC00506	1	0	1	1	3
hsa-miR-423-5p	MIMAT0004748	ENSG00000270160	ENST00000602773	RP11-264E20.2-001	RP11-264E20.2	1	0	1	1	3
hsa-miR-423-5p	MIMAT0004748	ENSG00000236144	ENST00000444728	TMEM147-AS1-001	TMEM147-AS1	1	0	1	1	3
hsa-miR-423-5p	MIMAT0004748	ENSG00000267520	ENST00000589496	RP11-373L24.1-001	RP11-373L24.1	1	0	1	1	3
hsa-miR-423-5p	MIMAT0004748	ENSG00000162947	ENST00000295052	AC007364.1-001	AC007364.1	1	0	1	1	3
hsa-miR-423-5p	MIMAT0004748	ENSG00000263072	ENST00000577163	ZNF213-AS1-005	ZNF213-AS1	1	0	1	1	3
hsa-miR-423-5p	MIMAT0004748	ENSG00000225180	ENST00000571031	AATK-AS1-002	AATK-AS1	1	0	1	1	3
hsa-miR-423-5p	MIMAT0004748	ENSG00000261003	ENST00000564198	RP1-140C12.2-001	RP1-140C12.2	1	0	1	1	3
hsa-miR-423-5p	MIMAT0004748	ENSG00000203709	ENST00000608023	C1orf132-001	C1orf132	1	0	1	1	3
hsa-miR-423-5p	MIMAT0004748	ENSG00000227165	ENST00000456120	WDR11-AS1-001	WDR11-AS1	1	0	1	1	3
hsa-miR-423-5p	MIMAT0004748	ENSG00000273151	ENST00000609998	RP11-449P15.2-001	RP11-449P15.2	1	0	1	1	3
hsa-miR-423-5p	MIMAT0004748	ENSG00000279044	ENST00000625100	AC007787.3-001	AC007787.3	1	0	1	1	3
hsa-miR-423-5p	MIMAT0004748	ENSG00000230212	ENST00000535199	AP000688.14-002	AP000688.14	1	0	1	1	3
hsa-miR-423-5p	MIMAT0004748	ENSG00000234449	ENST00000438107	RP11-706O15.3-002	RP11-706O15.3	1	0	1	1	3
hsa-miR-423-5p	MIMAT0004748	ENSG00000261713	ENST00000569832	SSTR5-AS1-001	SSTR5-AS1	1	0	1	1	3
hsa-miR-423-5p	MIMAT0004748	ENSG00000213904	ENST00000594688	LIPE-AS1-004	LIPE-AS1	1	0	1	1	3
hsa-miR-423-5p	MIMAT0004748	ENSG00000267665	ENST00000592572	RP11-13K12.2-001	RP11-13K12.2	1	0	1	1	3
hsa-miR-423-5p	MIMAT0004748	ENSG00000174365	ENST00000418383	SNHG11-001	SNHG11	1	0	1	1	3
hsa-miR-423-5p	MIMAT0004748	ENSG00000235016	ENST00000437204	SEMA3F-AS1-001	SEMA3F-AS1	1	0	1	1	3
hsa-miR-423-5p	MIMAT0004748	ENSG00000280344	ENST00000624410	AC009166.7-001	AC009166.7	1	0	1	1	3
hsa-miR-423-5p	MIMAT0004748	ENSG00000227372	ENST00000452079	TP73-AS1-003	TP73-AS1	1	0	1	1	3
hsa-miR-423-5p	MIMAT0004748	ENSG00000259267	ENST00000558852	RP11-432J9.6-002	RP11-432J9.6	1	0	1	1	3
hsa-miR-423-5p	MIMAT0004748	ENSG00000226308	ENST00000412321	RP4-813D12.3-001	RP4-813D12.3	1	0	1	1	3
hsa-miR-423-5p	MIMAT0004748	ENSG00000235790	ENST00000623786	RP11-73M7.6-025	RP11-73M7.6	1	0	1	1	3
hsa-miR-423-5p	MIMAT0004748	ENSG00000228261	ENST00000434792	RP11-127L20.3-001	RP11-127L20.3	1	0	1	1	3
hsa-miR-423-5p	MIMAT0004748	ENSG00000232406	ENST00000441208	RP11-234K24.3-001	RP11-234K24.3	1	0	1	1	3
hsa-miR-423-5p	MIMAT0004748	ENSG00000279861	ENST00000624088	RP11-43N16.4-001	RP11-43N16.4	1	0	1	1	3
hsa-miR-423-5p	MIMAT0004748	ENSG00000245694	ENST00000557792	CRNDE-005	CRNDE	1	0	1	1	3
hsa-miR-423-5p	MIMAT0004748	ENSG00000233098	ENST00000583962	CCDC144NL-AS1-018	CCDC144NL-AS1	1	0	1	1	3
hsa-miR-423-5p	MIMAT0004748	ENSG00000260660	ENST00000563803	RP11-69H7.2-002	RP11-69H7.2	1	0	1	1	3
hsa-miR-423-5p	MIMAT0004748	ENSG00000266821	ENST00000580282	RP11-6N17.2-001	RP11-6N17.2	1	0	1	1	3
hsa-miR-423-5p	MIMAT0004748	ENSG00000269959	ENST00000602324	SPACA6P-AS-001	SPACA6P-AS	1	0	1	1	3
hsa-miR-423-5p	MIMAT0004748	ENSG00000267383	ENST00000585498	CTC-260E6.6-003	CTC-260E6.6	1	0	1	1	3
hsa-miR-423-5p	MIMAT0004748	ENSG00000280038	ENST00000623634	DNM1P41-001	DNM1P41	1	0	1	1	3
hsa-miR-423-5p	MIMAT0004748	ENSG00000255857	ENST00000620336	PXN-AS1-006	PXN-AS1	1	0	1	1	3
hsa-miR-423-5p	MIMAT0004748	ENSG00000278918	ENST00000623156	CTD-2267D19.1-001	CTD-2267D19.1	1	0	1	1	3
hsa-miR-423-5p	MIMAT0004748	ENSG00000235470	ENST00000453753	NEURL1-AS1-001	NEURL1-AS1	1	0	1	1	3
hsa-miR-423-5p	MIMAT0004748	ENSG00000259605	ENST00000559756	AC074212.5-001	AC074212.5	1	0	1	1	3
hsa-miR-423-5p	MIMAT0004748	ENSG00000234229	ENST00000444985	LINC01505-002	LINC01505	1	0	1	1	3
hsa-miR-423-5p	MIMAT0004748	ENSG00000261542	ENST00000569835	RP11-16E18.3-001	RP11-16E18.3	1	0	1	1	3
hsa-miR-423-5p	MIMAT0004748	ENSG00000249413	ENST00000508572	RP11-25H12.1-001	RP11-25H12.1	1	0	1	1	3
hsa-miR-423-5p	MIMAT0004748	ENSG00000260296	ENST00000567102	RP11-395I6.3-001	RP11-395I6.3	1	0	1	1	3
hsa-miR-423-5p	MIMAT0004748	ENSG00000230805	ENST00000556136	AL132709.1-004	AL132709.1	1	0	1	1	3
hsa-miR-423-5p	MIMAT0004748	ENSG00000277152	ENST00000617013	RP11-622C24.2-001	RP11-622C24.2	1	0	1	1	3
hsa-miR-423-5p	MIMAT0004748	ENSG00000225209	ENST00000444745	RP11-358M3.1-001	RP11-358M3.1	1	0	1	1	3
hsa-miR-423-5p	MIMAT0004748	ENSG00000261025	ENST00000568143	RP11-84D1.2-001	RP11-84D1.2	1	0	1	1	3
hsa-miR-423-5p	MIMAT0004748	ENSG00000231703	ENST00000436286	RP4-669H2.1-001	RP4-669H2.1	1	0	1	1	3
hsa-miR-423-5p	MIMAT0004748	ENSG00000265485	ENST00000583558	RP11-449D8.1-002	RP11-449D8.1	1	0	1	1	3
hsa-miR-423-5p	MIMAT0004748	ENSG00000224165	ENST00000451291	DNAJC27-AS1-007	DNAJC27-AS1	1	0	1	1	3
hsa-miR-423-5p	MIMAT0004748	ENSG00000237402	ENST00000427317	CAMTA1-IT1-001	CAMTA1-IT1	1	0	1	1	3
hsa-miR-423-5p	MIMAT0004748	ENSG00000275226	ENST00000612438	LINC00547-001	LINC00547	1	0	1	1	3
hsa-miR-423-5p	MIMAT0004748	ENSG00000249673	ENST00000503709	NOP14-AS1-007	NOP14-AS1	1	0	1	1	3
hsa-miR-423-5p	MIMAT0004748	ENSG00000279713	ENST00000623346	CTD-3035K23.3-001	CTD-3035K23.3	1	0	1	1	3
hsa-miR-423-5p	MIMAT0004748	ENSG00000226759	ENST00000588227	DAB1-AS1-009	DAB1-AS1	1	0	1	1	3
hsa-miR-423-5p	MIMAT0004748	ENSG00000263711	ENST00000581011	RP11-169F17.1-001	RP11-169F17.1	1	0	1	1	3
hsa-miR-423-5p	MIMAT0004748	ENSG00000277744	ENST00000616866	CTC-435M10.12-001	CTC-435M10.12	1	0	1	1	3
hsa-miR-423-5p	MIMAT0004748	ENSG00000280365	ENST00000624404	RP11-9H20.2-001	RP11-9H20.2	1	0	1	1	3
hsa-miR-423-5p	MIMAT0004748	ENSG00000247796	ENST00000502171	CTD-2366F13.1-001	CTD-2366F13.1	1	0	1	1	3
hsa-miR-423-5p	MIMAT0004748	ENSG00000279222	ENST00000623526	CTD-2194D22.5-001	CTD-2194D22.5	1	0	1	1	3
hsa-miR-423-5p	MIMAT0004748	ENSG00000232451	ENST00000432612	AC016768.1-002	AC016768.1	1	0	1	1	3
hsa-miR-423-5p	MIMAT0004748	ENSG00000237556	ENST00000427471	KCND3-AS1-002	KCND3-AS1	1	0	1	1	3
hsa-miR-423-5p	MIMAT0004748	ENSG00000254804	ENST00000528000	RP11-674C21.9-001	RP11-674C21.9	1	0	1	1	3
hsa-miR-423-5p	MIMAT0004748	ENSG00000262001	ENST00000573177	DLGAP1-AS2-003	DLGAP1-AS2	1	0	1	1	3
hsa-miR-423-5p	MIMAT0004748	ENSG00000214915	ENST00000454307	XX-FW80269A6.1-001	XX-FW80269A6.1	1	0	1	1	3
hsa-miR-423-5p	MIMAT0004748	ENSG00000255572	ENST00000543061	RP11-273B20.3-001	RP11-273B20.3	1	0	1	1	3
hsa-miR-423-5p	MIMAT0004748	ENSG00000235202	ENST00000442182	LINC01525-001	LINC01525	1	0	1	1	3
hsa-miR-423-5p	MIMAT0004748	ENSG00000231898	ENST00000627387	AC012594.1-059	AC012594.1	1	0	1	1	3
hsa-miR-423-5p	MIMAT0004748	ENSG00000259443	ENST00000560839	RP11-403B2.5-001	RP11-403B2.5	1	0	1	1	3
hsa-miR-423-5p	MIMAT0004748	ENSG00000274020	ENST00000440862	LINC01138-002	LINC01138	1	0	1	1	3
hsa-miR-423-5p	MIMAT0004748	ENSG00000230615	ENST00000453688	RP5-1198O20.4-002	RP5-1198O20.4	1	0	1	1	3
hsa-miR-423-5p	MIMAT0004748	ENSG00000215808	ENST00000400946	LINC01139-001	LINC01139	1	0	1	1	3
hsa-miR-423-5p	MIMAT0004748	ENSG00000246334	ENST00000425316	PRR7-AS1-001	PRR7-AS1	1	0	1	1	3
hsa-miR-423-5p	MIMAT0004748	ENSG00000225855	ENST00000450199	RUSC1-AS1-003	RUSC1-AS1	1	0	1	1	3
hsa-miR-423-5p	MIMAT0004748	ENSG00000261572	ENST00000565519	RP11-384L8.1-001	RP11-384L8.1	1	0	1	1	3
hsa-miR-423-5p	MIMAT0004748	ENSG00000270332	ENST00000603487	SMC2-AS1-002	SMC2-AS1	1	0	1	1	3
hsa-miR-423-5p	MIMAT0004748	ENSG00000279578	ENST00000622993	RP4-815D20.1-001	RP4-815D20.1	1	0	1	1	3
hsa-miR-423-5p	MIMAT0004748	ENSG00000179818	ENST00000630283	PCBP1-AS1-090	PCBP1-AS1	1	0	1	1	3
hsa-miR-423-5p	MIMAT0004748	ENSG00000258498	ENST00000556120	DIO3OS-012	DIO3OS	1	0	1	1	3
hsa-miR-423-5p	MIMAT0004748	ENSG00000280213	ENST00000623569	UCKL1-AS1-001	UCKL1-AS1	1	0	1	1	3
hsa-miR-423-5p	MIMAT0004748	ENSG00000256315	ENST00000543182	AP000462.1-001	AP000462.1	1	0	1	1	3
hsa-miR-423-5p	MIMAT0004748	ENSG00000224186	ENST00000513931	C5orf66-003	C5orf66	1	0	1	1	3
hsa-miR-423-5p	MIMAT0004748	ENSG00000279080	ENST00000624072	CTA-228A9.4-001	CTA-228A9.4	1	0	1	1	3
hsa-miR-423-5p	MIMAT0004748	ENSG00000214049	ENST00000397381	UCA1-001	UCA1	1	0	1	1	3
hsa-miR-423-5p	MIMAT0004748	ENSG00000254584	ENST00000531962	RP1-17K7.2-001	RP1-17K7.2	1	0	1	1	3
hsa-miR-423-5p	MIMAT0004748	ENSG00000249690	ENST00000507934	RP11-1336O20.2-001	RP11-1336O20.2	1	0	1	1	3
hsa-miR-423-5p	MIMAT0004748	ENSG00000271204	ENST00000605249	RP11-138A9.1-001	RP11-138A9.1	1	0	1	1	3
hsa-miR-423-5p	MIMAT0004748	ENSG00000279733	ENST00000624727	RP11-685B24.1-001	RP11-685B24.1	1	0	1	1	3
hsa-miR-423-5p	MIMAT0004748	ENSG00000255406	ENST00000532272	RP11-713P17.5-001	RP11-713P17.5	1	0	1	1	3
hsa-miR-423-5p	MIMAT0004748	ENSG00000235050	ENST00000592093	MLIP-AS1-007	MLIP-AS1	1	0	1	1	3
hsa-miR-423-5p	MIMAT0004748	ENSG00000280383	ENST00000623075	CTA-941F9.10-001	CTA-941F9.10	1	0	1	1	3
hsa-miR-423-5p	MIMAT0004748	ENSG00000231871	ENST00000421449	IPO9-AS1-002	IPO9-AS1	1	0	1	1	3
hsa-miR-423-5p	MIMAT0004748	ENSG00000233791	ENST00000457348	LINC01136-001	LINC01136	1	0	1	1	3
hsa-miR-423-5p	MIMAT0004748	ENSG00000261218	ENST00000568131	RP11-960L18.1-004	RP11-960L18.1	1	0	1	1	3
hsa-miR-423-5p	MIMAT0004748	ENSG00000204623	ENST00000448093	ZNRD1-AS1-007	ZNRD1-AS1	1	0	1	1	3
hsa-miR-423-5p	MIMAT0004748	ENSG00000251331	ENST00000512343	RP11-689K5.3-004	RP11-689K5.3	1	0	1	1	3
hsa-miR-423-5p	MIMAT0004748	ENSG00000262075	ENST00000601276	DKFZP434A062-201	DKFZP434A062	1	0	1	1	3
hsa-miR-423-5p	MIMAT0004748	ENSG00000231312	ENST00000443038	AC007246.3-010	AC007246.3	1	0	1	1	3
hsa-miR-423-5p	MIMAT0004748	ENSG00000258819	ENST00000556781	RP11-7F17.3-003	RP11-7F17.3	1	0	1	1	3
hsa-miR-423-5p	MIMAT0004748	ENSG00000223806	ENST00000411989	LINC00114-004	LINC00114	1	0	1	1	3
hsa-miR-423-5p	MIMAT0004748	ENSG00000237159	ENST00000436360	CNTFR-AS1-001	CNTFR-AS1	1	0	1	1	3
hsa-miR-423-5p	MIMAT0004748	ENSG00000261404	ENST00000562888	AC009120.4-003	AC009120.4	1	0	1	1	3
hsa-miR-423-5p	MIMAT0004748	ENSG00000280850	ENST00000629925	RP4-655C5.9-001	RP4-655C5.9	1	0	1	1	3
hsa-miR-423-5p	MIMAT0004748	ENSG00000270015	ENST00000602886	RP11-540B6.6-001	RP11-540B6.6	1	0	1	1	3
hsa-miR-423-5p	MIMAT0004748	ENSG00000255041	ENST00000528445	RP11-430H10.4-001	RP11-430H10.4	1	0	1	1	3
hsa-miR-423-5p	MIMAT0004748	ENSG00000246379	ENST00000501259	RP11-461O7.1-001	RP11-461O7.1	1	0	1	1	3
hsa-miR-423-5p	MIMAT0004748	ENSG00000259031	ENST00000553301	CTD-2062F14.3-001	CTD-2062F14.3	1	0	1	1	3
hsa-miR-423-5p	MIMAT0004748	ENSG00000260898	ENST00000563592	ADPGK-AS1-001	ADPGK-AS1	1	0	1	1	3
hsa-miR-423-5p	MIMAT0004748	ENSG00000198491	ENST00000356133	RP11-208N14.4-001	RP11-208N14.4	1	0	1	1	3
hsa-miR-423-5p	MIMAT0004748	ENSG00000257500	ENST00000548135	RP11-1020M18.10-001	RP11-1020M18.10	1	0	1	1	3
hsa-miR-423-5p	MIMAT0004748	ENSG00000261606	ENST00000488000	RP11-414J4.2-001	RP11-414J4.2	1	0	1	1	3
hsa-miR-423-5p	MIMAT0004748	ENSG00000277287	ENST00000621919	RP4-794I6.4-001	RP4-794I6.4	1	0	1	1	3
hsa-miR-423-5p	MIMAT0004748	ENSG00000248727	ENST00000511661	CTC-236F12.4-001	CTC-236F12.4	1	0	1	1	3
hsa-miR-423-5p	MIMAT0004748	ENSG00000269289	ENST00000596326	CTB-92J24.3-001	CTB-92J24.3	1	0	1	1	3
hsa-miR-423-5p	MIMAT0004748	ENSG00000251161	ENST00000503052	RP11-540O11.1-001	RP11-540O11.1	1	0	1	1	3
hsa-miR-423-5p	MIMAT0004748	ENSG00000236356	ENST00000426716	AC079584.2-001	AC079584.2	1	0	1	1	3
hsa-miR-423-5p	MIMAT0004748	ENSG00000245330	ENST00000500705	KB-1471A8.1-001	KB-1471A8.1	1	0	1	1	3
hsa-miR-423-5p	MIMAT0004748	ENSG00000258703	ENST00000555316	RP11-1085N6.4-001	RP11-1085N6.4	1	0	1	1	3
hsa-miR-423-5p	MIMAT0004748	ENSG00000223597	ENST00000500616	CTD-2296D1.5-001	CTD-2296D1.5	1	0	1	1	3
hsa-miR-423-5p	MIMAT0004748	ENSG00000228789	ENST00000615046	HCG22-203	HCG22	1	0	1	1	3
hsa-miR-423-5p	MIMAT0004748	ENSG00000272620	ENST00000608442	AFAP1-AS1-001	AFAP1-AS1	1	0	1	1	3
hsa-miR-423-5p	MIMAT0004748	ENSG00000269793	ENST00000600093	ZIM2-AS1-002	ZIM2-AS1	1	0	1	1	3
hsa-miR-423-5p	MIMAT0004748	ENSG00000279273	ENST00000624285	CTD-2526A2.4-001	CTD-2526A2.4	1	0	1	1	3
hsa-miR-423-5p	MIMAT0004748	ENSG00000273485	ENST00000608063	RP11-225H22.7-001	RP11-225H22.7	1	0	1	1	3
hsa-miR-423-5p	MIMAT0004748	ENSG00000226367	ENST00000446784	ST7-AS2-003	ST7-AS2	1	0	1	1	3
hsa-miR-423-5p	MIMAT0004748	ENSG00000260743	ENST00000569932	RP11-255C15.3-001	RP11-255C15.3	1	0	1	1	3
hsa-miR-423-5p	MIMAT0004748	ENSG00000177738	ENST00000499871	CTD-2201E18.3-002	CTD-2201E18.3	1	0	1	1	3
hsa-miR-423-5p	MIMAT0004748	ENSG00000233178	ENST00000609241	RP11-88I18.2-004	RP11-88I18.2	1	0	1	1	3
hsa-miR-423-5p	MIMAT0004748	ENSG00000268181	ENST00000593633	RP11-73B2.7-002	RP11-73B2.7	1	0	1	1	3
hsa-miR-423-5p	MIMAT0004748	ENSG00000278713	ENST00000611923	CTD-2574D22.7-001	CTD-2574D22.7	1	0	1	1	3
hsa-miR-423-5p	MIMAT0004748	ENSG00000235263	ENST00000441033	RP13-392I16.1-001	RP13-392I16.1	1	0	1	1	3
hsa-miR-423-5p	MIMAT0004748	ENSG00000257253	ENST00000547902	RP11-70F11.7-001	RP11-70F11.7	1	0	1	1	3
hsa-miR-423-5p	MIMAT0004748	ENSG00000280927	ENST00000625256	CTBP1-AS-001	CTBP1-AS	1	0	1	1	3
hsa-miR-423-5p	MIMAT0004748	ENSG00000205663	ENST00000381106	RP11-706O15.5-002	RP11-706O15.5	1	0	1	1	3
hsa-miR-423-5p	MIMAT0004748	ENSG00000234113	ENST00000412900	AC008163.4-001	AC008163.4	1	0	1	1	3
hsa-miR-423-5p	MIMAT0004748	ENSG00000249306	ENST00000510234	LINC01411-002	LINC01411	1	0	1	1	3
hsa-miR-423-5p	MIMAT0004748	ENSG00000226629	ENST00000456403	LINC00974-001	LINC00974	1	0	1	1	3
hsa-miR-423-5p	MIMAT0004748	ENSG00000259054	ENST00000557232	AE000662.93-001	AE000662.93	1	0	1	1	3
hsa-miR-423-5p	MIMAT0004748	ENSG00000233421	ENST00000614408	RP5-875O13.1-201	RP5-875O13.1	1	0	1	1	3
hsa-miR-423-5p	MIMAT0004748	ENSG00000281769	ENST00000625222	LINC01230-001	LINC01230	1	0	1	1	3
hsa-miR-423-5p	MIMAT0004748	ENSG00000232907	ENST00000439595	DLGAP4-AS1-002	DLGAP4-AS1	1	0	1	1	3
hsa-miR-423-5p	MIMAT0004748	ENSG00000234912	ENST00000434411	SNHG20-001	SNHG20	1	0	1	1	3
hsa-miR-423-5p	MIMAT0004748	ENSG00000250358	ENST00000508879	RP11-159K7.2-001	RP11-159K7.2	1	0	1	1	3
hsa-miR-423-5p	MIMAT0004748	ENSG00000261087	ENST00000565617	KB-1460A1.5-001	KB-1460A1.5	1	0	1	1	3
hsa-miR-423-5p	MIMAT0004748	ENSG00000269364	ENST00000594200	LINC01233-003	LINC01233	1	0	1	1	3
hsa-miR-423-5p	MIMAT0004748	ENSG00000214353	ENST00000562507	VAC14-AS1-001	VAC14-AS1	1	0	1	1	3
hsa-miR-423-5p	MIMAT0004748	ENSG00000259833	ENST00000563968	RP11-23E19.1-001	RP11-23E19.1	1	0	1	1	3
hsa-miR-423-5p	MIMAT0004748	ENSG00000258719	ENST00000555954	RP11-232C2.3-001	RP11-232C2.3	1	0	1	1	3
hsa-miR-423-5p	MIMAT0004748	ENSG00000175699	ENST00000449472	LINC00521-006	LINC00521	1	0	1	1	3
hsa-miR-423-5p	MIMAT0004748	ENSG00000237054	ENST00000590290	PRMT5-AS1-004	PRMT5-AS1	1	0	1	1	3
hsa-miR-423-5p	MIMAT0004748	ENSG00000229732	ENST00000411759	AC019349.5-001	AC019349.5	1	0	1	1	3
hsa-miR-423-5p	MIMAT0004748	ENSG00000250635	ENST00000514287	CTD-3224K15.2-001	CTD-3224K15.2	1	0	1	1	3
hsa-miR-423-5p	MIMAT0004748	ENSG00000261257	ENST00000567082	RP11-673E11.2-001	RP11-673E11.2	1	0	1	1	3
hsa-miR-423-5p	MIMAT0004748	ENSG00000254872	ENST00000617529	RP13-870H17.3-002	RP13-870H17.3	1	0	1	1	3
hsa-miR-423-5p	MIMAT0004748	ENSG00000279296	ENST00000624952	RP11-609D21.3-001	RP11-609D21.3	1	0	1	1	3
hsa-miR-423-5p	MIMAT0004748	ENSG00000262179	ENST00000573382	RP1-302G2.5-001	RP1-302G2.5	1	0	1	1	3
hsa-miR-423-5p	MIMAT0004748	ENSG00000215190	ENST00000418765	LINC00680-005	LINC00680	1	0	1	1	3
hsa-miR-423-5p	MIMAT0004748	ENSG00000267296	ENST00000592982	CEBPA-AS1-001	CEBPA-AS1	1	0	1	1	3
hsa-miR-423-5p	MIMAT0004748	ENSG00000188242	ENST00000342584	PP7080-002	PP7080	1	0	1	1	3
hsa-miR-423-5p	MIMAT0004748	ENSG00000279954	ENST00000623717	WI2-85898F10.2-001	WI2-85898F10.2	1	0	1	1	3
hsa-miR-423-5p	MIMAT0004748	ENSG00000223839	ENST00000591605	FAM95B1-013	FAM95B1	1	0	1	1	3
hsa-miR-423-5p	MIMAT0004748	ENSG00000268230	ENST00000599109	CTD-2619J13.8-001	CTD-2619J13.8	1	0	1	1	3
hsa-miR-423-5p	MIMAT0004748	ENSG00000257275	ENST00000553445	RP11-164H13.1-003	RP11-164H13.1	1	0	1	1	3
hsa-miR-423-5p	MIMAT0004748	ENSG00000227741	ENST00000418602	RP11-536C5.7-001	RP11-536C5.7	1	0	1	1	3
hsa-miR-423-5p	MIMAT0004748	ENSG00000274269	ENST00000619766	RP4-545L17.12-001	RP4-545L17.12	1	0	1	1	3
hsa-miR-423-5p	MIMAT0004748	ENSG00000261442	ENST00000569678	RP11-709D24.6-001	RP11-709D24.6	1	0	1	1	3
hsa-miR-423-5p	MIMAT0004748	ENSG00000249310	ENST00000513758	APOBEC3B-AS1-001	APOBEC3B-AS1	1	0	1	1	3
hsa-miR-423-5p	MIMAT0004748	ENSG00000230698	ENST00000435478	CTD-2330K9.2-001	CTD-2330K9.2	1	0	1	1	3
hsa-miR-423-5p	MIMAT0004748	ENSG00000224078	ENST00000549804	SNHG14-012	SNHG14	1	0	1	1	3
hsa-miR-423-5p	MIMAT0004748	ENSG00000268798	ENST00000594262	CTB-25B13.5-001	CTB-25B13.5	1	0	1	1	3
hsa-miR-423-5p	MIMAT0004748	ENSG00000234352	ENST00000592183	AC009264.1-004	AC009264.1	1	0	1	1	3
hsa-miR-423-5p	MIMAT0004748	ENSG00000257556	ENST00000548104	RP11-44N21.1-001	RP11-44N21.1	1	0	1	1	3
hsa-miR-423-5p	MIMAT0004748	ENSG00000270760	ENST00000604228	AD001527.7-001	AD001527.7	1	0	1	1	3
hsa-miR-423-5p	MIMAT0004748	ENSG00000260402	ENST00000568730	RP11-56L13.1-002	RP11-56L13.1	1	0	1	1	3
hsa-miR-423-5p	MIMAT0004748	ENSG00000197665	ENST00000399083	AC007952.6-002	AC007952.6	1	0	1	1	3
hsa-miR-423-5p	MIMAT0004748	ENSG00000256540	ENST00000537961	RP11-598F7.6-002	RP11-598F7.6	1	0	1	1	3
hsa-miR-423-5p	MIMAT0004748	ENSG00000280276	ENST00000623854	RP11-314C9.1-001	RP11-314C9.1	1	0	1	1	3
hsa-miR-423-5p	MIMAT0004748	ENSG00000273302	ENST00000609422	RP11-493E12.2-001	RP11-493E12.2	1	0	1	1	3
hsa-miR-423-5p	MIMAT0004748	ENSG00000214548	ENST00000423456	MEG3-002	MEG3	1	0	1	1	3
hsa-miR-423-5p	MIMAT0004748	ENSG00000267213	ENST00000592680	AC007773.2-001	AC007773.2	1	0	1	1	3
hsa-miR-423-5p	MIMAT0004748	ENSG00000279796	ENST00000623755	RP11-317F20.3-001	RP11-317F20.3	1	0	1	1	3
hsa-miR-423-5p	MIMAT0004748	ENSG00000233056	ENST00000447535	ERVH48-1-001	ERVH48-1	1	0	1	1	3
hsa-miR-423-5p	MIMAT0004748	ENSG00000241648	ENST00000467225	CADM2-AS2-001	CADM2-AS2	1	0	1	1	3
hsa-miR-423-5p	MIMAT0004748	ENSG00000237686	ENST00000422059	RP5-1120P11.1-001	RP5-1120P11.1	1	0	1	1	3
hsa-miR-423-5p	MIMAT0004748	ENSG00000279319	ENST00000623380	RP11-693M3.1-001	RP11-693M3.1	1	0	1	1	3
hsa-miR-423-5p	MIMAT0004748	ENSG00000271937	ENST00000607510	RP11-424N24.2-001	RP11-424N24.2	1	0	1	1	3
hsa-miR-423-5p	MIMAT0004748	ENSG00000232586	ENST00000415647	KIAA1614-AS1-001	KIAA1614-AS1	1	0	1	1	3
hsa-miR-423-5p	MIMAT0004748	ENSG00000178803	ENST00000427813	ADORA2A-AS1-003	ADORA2A-AS1	1	0	1	1	3
hsa-miR-423-5p	MIMAT0004748	ENSG00000268316	ENST00000596964	AC006272.2-001	AC006272.2	1	0	1	1	3
hsa-miR-423-5p	MIMAT0004748	ENSG00000281162	ENST00000627215	LINC01127-001	LINC01127	1	0	1	1	3
hsa-miR-423-5p	MIMAT0004748	ENSG00000205861	ENST00000435039	C1QTNF9B-AS1-201	C1QTNF9B-AS1	1	0	1	1	3
hsa-miR-423-5p	MIMAT0004748	ENSG00000266970	ENST00000587575	RP11-806H10.4-002	RP11-806H10.4	1	0	1	1	3
hsa-miR-423-5p	MIMAT0004748	ENSG00000237941	ENST00000441418	KCNQ1DN-001	KCNQ1DN	1	0	1	1	3
hsa-miR-423-5p	MIMAT0004748	ENSG00000279488	ENST00000624592	AC004623.3-001	AC004623.3	1	0	1	1	3
hsa-miR-423-5p	MIMAT0004748	ENSG00000236091	ENST00000441841	RP3-473B4.3-001	RP3-473B4.3	1	0	1	1	3
hsa-miR-423-5p	MIMAT0004748	ENSG00000251616	ENST00000507389	RP11-485M7.3-001	RP11-485M7.3	1	0	1	1	3
hsa-miR-423-5p	MIMAT0004748	ENSG00000219665	ENST00000476474	CTD-2006C1.2-004	CTD-2006C1.2	1	0	1	1	3
hsa-miR-423-5p	MIMAT0004748	ENSG00000280143	ENST00000624094	AP000892.6-001	AP000892.6	1	0	1	1	3
hsa-miR-423-5p	MIMAT0004748	ENSG00000212766	ENST00000559964	EWSAT1-005	EWSAT1	1	0	1	1	3
hsa-miR-423-5p	MIMAT0004748	ENSG00000232160	ENST00000441399	RAP2C-AS1-002	RAP2C-AS1	1	0	1	1	3
hsa-miR-423-5p	MIMAT0004748	ENSG00000267092	ENST00000590252	CTB-25B13.9-001	CTB-25B13.9	1	0	1	1	3
hsa-miR-423-5p	MIMAT0004748	ENSG00000249602	ENST00000512280	RP11-98D18.3-001	RP11-98D18.3	1	0	1	1	3
hsa-miR-423-5p	MIMAT0004748	ENSG00000253227	ENST00000517482	RP11-383J24.1-001	RP11-383J24.1	1	0	1	1	3
hsa-miR-423-5p	MIMAT0004748	ENSG00000225339	ENST00000586726	RP11-513I15.6-003	RP11-513I15.6	1	0	1	1	3
hsa-miR-423-5p	MIMAT0004748	ENSG00000214548	ENST00000524035	MEG3-018	MEG3	1	0	1	1	3
hsa-miR-423-5p	MIMAT0004748	ENSG00000232354	ENST00000626992	VIPR1-AS1-022	VIPR1-AS1	1	0	1	1	3
hsa-miR-423-5p	MIMAT0004748	ENSG00000248837	ENST00000506425	RP11-412P11.1-003	RP11-412P11.1	1	0	1	1	3
hsa-miR-423-5p	MIMAT0004748	ENSG00000236423	ENST00000442673	LINC01134-003	LINC01134	1	0	1	1	3
hsa-miR-423-5p	MIMAT0004748	ENSG00000229807	ENST00000429829	XIST-001	XIST	1	0	1	1	3
hsa-miR-423-5p	MIMAT0004748	ENSG00000257023	ENST00000542076	RP11-268P4.4-001	RP11-268P4.4	1	0	1	1	3
hsa-miR-423-5p	MIMAT0004748	ENSG00000279339	ENST00000625199	CTD-2373H9.3-001	CTD-2373H9.3	1	0	1	1	3
hsa-miR-423-5p	MIMAT0004748	ENSG00000262332	ENST00000574883	RP11-517A5.7-001	RP11-517A5.7	1	0	1	1	3
hsa-miR-423-5p	MIMAT0004748	ENSG00000255775	ENST00000539206	RP3-454B23.1-001	RP3-454B23.1	1	0	1	1	3
hsa-miR-423-5p	MIMAT0004748	ENSG00000246100	ENST00000501294	LINC00900-002	LINC00900	1	0	1	1	3
hsa-miR-423-5p	MIMAT0004748	ENSG00000258920	ENST00000555562	FOXN3-AS1-001	FOXN3-AS1	1	0	1	1	3
hsa-miR-423-5p	MIMAT0004748	ENSG00000264693	ENST00000581626	RP11-63N3.1-001	RP11-63N3.1	1	0	1	1	3
hsa-miR-423-5p	MIMAT0004748	ENSG00000233246	ENST00000432703	RP11-415J8.5-001	RP11-415J8.5	1	0	1	1	3
hsa-miR-423-5p	MIMAT0004748	ENSG00000281207	ENST00000626479	SLFNL1-AS1-001	SLFNL1-AS1	1	0	1	1	3
hsa-miR-423-5p	MIMAT0004748	ENSG00000259553	ENST00000561145	AC140725.4-001	AC140725.4	1	0	1	1	3
hsa-miR-423-5p	MIMAT0004748	ENSG00000234191	ENST00000438867	RP11-157D23.2-001	RP11-157D23.2	1	0	1	1	3
hsa-miR-423-5p	MIMAT0004748	ENSG00000267493	ENST00000585832	CIRBP-AS1-001	CIRBP-AS1	1	0	1	1	3
hsa-miR-423-5p	MIMAT0004748	ENSG00000246859	ENST00000500779	STARD4-AS1-002	STARD4-AS1	1	0	1	1	3
hsa-miR-423-5p	MIMAT0004748	ENSG00000277020	ENST00000618162	RP11-476H16.1-001	RP11-476H16.1	1	0	1	1	3
hsa-miR-423-5p	MIMAT0004748	ENSG00000196951	ENST00000512692	SCOC-AS1-001	SCOC-AS1	1	0	1	1	3
hsa-miR-423-5p	MIMAT0004748	ENSG00000225156	ENST00000425325	AC012354.6-001	AC012354.6	1	0	1	1	3
hsa-miR-423-5p	MIMAT0004748	ENSG00000268941	ENST00000598340	RP5-907D15.4-001	RP5-907D15.4	1	0	1	1	3
hsa-miR-423-5p	MIMAT0004748	ENSG00000237371	ENST00000455524	RP13-152O15.5-001	RP13-152O15.5	1	0	1	1	3
hsa-miR-423-5p	MIMAT0004748	ENSG00000234394	ENST00000429953	RP11-561O23.5-001	RP11-561O23.5	1	0	1	1	3
hsa-miR-423-5p	MIMAT0004748	ENSG00000251045	ENST00000508452	CTC-321K16.4-001	CTC-321K16.4	1	0	1	1	3
hsa-miR-423-5p	MIMAT0004748	ENSG00000236255	ENST00000420330	AC009404.2-003	AC009404.2	1	0	1	1	3
hsa-miR-423-5p	MIMAT0004748	ENSG00000279674	ENST00000624332	RP11-1086I4.2-001	RP11-1086I4.2	1	0	1	1	3
hsa-miR-423-5p	MIMAT0004748	ENSG00000279675	ENST00000624239	RP11-454H19.2-001	RP11-454H19.2	1	0	1	1	3
hsa-miR-423-5p	MIMAT0004748	ENSG00000260464	ENST00000565336	RP4-561L24.3-001	RP4-561L24.3	1	0	1	1	3
hsa-miR-423-5p	MIMAT0004748	ENSG00000267649	ENST00000591484	CTD-2587H24.10-002	CTD-2587H24.10	1	0	1	1	3
hsa-miR-423-5p	MIMAT0004748	ENSG00000272483	ENST00000606330	RP11-169K17.3-001	RP11-169K17.3	1	0	1	1	3
hsa-miR-423-5p	MIMAT0004748	ENSG00000280323	ENST00000623864	AC053503.12-001	AC053503.12	1	0	1	1	3
hsa-miR-423-5p	MIMAT0004748	ENSG00000204241	ENST00000531938	RP11-713P17.3-007	RP11-713P17.3	1	0	1	1	3
hsa-miR-423-5p	MIMAT0004748	ENSG00000231781	ENST00000455845	AC079896.1-001	AC079896.1	1	0	1	1	3
hsa-miR-423-5p	MIMAT0004748	ENSG00000265975	ENST00000578788	CTB-41I6.2-001	CTB-41I6.2	1	0	1	1	3
hsa-miR-423-5p	MIMAT0004748	ENSG00000269534	ENST00000596563	CTC-453G23.5-001	CTC-453G23.5	1	0	1	1	3
hsa-miR-423-5p	MIMAT0004748	ENSG00000235790	ENST00000591592	RP11-73M7.6-003	RP11-73M7.6	1	0	1	1	3
hsa-miR-423-5p	MIMAT0004748	ENSG00000214719	ENST00000440026	AC005562.1-002	AC005562.1	1	0	1	1	3
hsa-miR-423-5p	MIMAT0004748	ENSG00000261848	ENST00000575487	CTD-2309O5.3-002	CTD-2309O5.3	1	0	1	1	3
hsa-miR-423-5p	MIMAT0004748	ENSG00000186056	ENST00000414532	MATN1-AS1-002	MATN1-AS1	1	0	1	1	3
hsa-miR-423-5p	MIMAT0004748	ENSG00000264107	ENST00000583377	RP11-848P1.5-001	RP11-848P1.5	1	0	1	1	3
hsa-miR-423-5p	MIMAT0004748	ENSG00000237125	ENST00000507571	HAND2-AS1-004	HAND2-AS1	1	0	1	1	3
hsa-miR-423-5p	MIMAT0004748	ENSG00000278291	ENST00000610494	RP11-172H24.4-001	RP11-172H24.4	1	0	1	1	3
hsa-miR-423-5p	MIMAT0004748	ENSG00000261332	ENST00000563751	RP11-297C4.1-001	RP11-297C4.1	1	0	1	1	3
hsa-miR-423-5p	MIMAT0004748	ENSG00000279359	ENST00000623657	RP11-36D19.9-001	RP11-36D19.9	1	0	1	1	3
hsa-miR-423-5p	MIMAT0004748	ENSG00000226482	ENST00000422718	ADIPOQ-AS1-001	ADIPOQ-AS1	1	0	1	1	3
hsa-miR-423-5p	MIMAT0004748	ENSG00000234859	ENST00000430006	AC003958.2-001	AC003958.2	1	0	1	1	3
hsa-miR-423-5p	MIMAT0004748	ENSG00000276436	ENST00000615830	RP11-195L15.2-001	RP11-195L15.2	1	0	1	1	3
hsa-miR-423-5p	MIMAT0004748	ENSG00000223947	ENST00000452364	AC016738.4-001	AC016738.4	1	0	1	1	3
hsa-miR-423-5p	MIMAT0004748	ENSG00000233303	ENST00000458531	XXYLT1-AS1-001	XXYLT1-AS1	1	0	1	1	3
hsa-miR-423-5p	MIMAT0004748	ENSG00000235437	ENST00000608623	LINC01278-004	LINC01278	1	0	1	1	3
hsa-miR-423-5p	MIMAT0004748	ENSG00000281392	ENST00000629052	LINC00506-003	LINC00506	1	0	1	1	3
hsa-miR-423-5p	MIMAT0004748	ENSG00000236144	ENST00000588286	TMEM147-AS1-004	TMEM147-AS1	1	0	1	1	3
hsa-miR-423-5p	MIMAT0004748	ENSG00000232748	ENST00000417110	RP11-196G11.6-201	RP11-196G11.6	1	0	1	1	3
hsa-miR-423-5p	MIMAT0004748	ENSG00000280179	ENST00000623297	CH507-42P11.6-003	CH507-42P11.6	1	0	1	1	3
hsa-miR-423-5p	MIMAT0004748	ENSG00000247011	ENST00000501718	RP11-700H6.1-001	RP11-700H6.1	1	0	1	1	3
hsa-miR-423-5p	MIMAT0004748	ENSG00000227165	ENST00000598981	WDR11-AS1-003	WDR11-AS1	1	0	1	1	3
hsa-miR-423-5p	MIMAT0004748	ENSG00000265413	ENST00000578897	RP11-789C17.1-001	RP11-789C17.1	1	0	1	1	3
hsa-miR-423-5p	MIMAT0004748	ENSG00000261713	ENST00000624643	SSTR5-AS1-002	SSTR5-AS1	1	0	1	1	3
hsa-miR-423-5p	MIMAT0004748	ENSG00000275162	ENST00000613285	LLNLR-260G6.1-001	LLNLR-260G6.1	1	0	1	1	3
hsa-miR-423-5p	MIMAT0004748	ENSG00000267666	ENST00000591866	AC004156.3-001	AC004156.3	1	0	1	1	3
hsa-miR-423-5p	MIMAT0004748	ENSG00000174365	ENST00000420006	SNHG11-015	SNHG11	1	0	1	1	3
hsa-miR-423-5p	MIMAT0004748	ENSG00000250508	ENST00000512200	RP11-757G1.6-001	RP11-757G1.6	1	0	1	1	3
hsa-miR-423-5p	MIMAT0004748	ENSG00000247765	ENST00000500487	RP11-32B5.7-001	RP11-32B5.7	1	0	1	1	3
hsa-miR-423-5p	MIMAT0004748	ENSG00000224376	ENST00000415129	AC017104.6-001	AC017104.6	1	0	1	1	3
hsa-miR-423-5p	MIMAT0004748	ENSG00000251294	ENST00000510391	RP11-116O11.1-001	RP11-116O11.1	1	0	1	1	3
hsa-miR-423-5p	MIMAT0004748	ENSG00000273382	ENST00000608574	RP5-1065J22.8-001	RP5-1065J22.8	1	0	1	1	3
hsa-miR-423-5p	MIMAT0004748	ENSG00000248908	ENST00000504339	RP11-730N24.1-001	RP11-730N24.1	1	0	1	1	3
hsa-miR-423-5p	MIMAT0004748	ENSG00000230461	ENST00000598091	PROX1-AS1-004	PROX1-AS1	1	0	1	1	3
hsa-miR-423-5p	MIMAT0004748	ENSG00000234684	ENST00000609285	SDCBP2-AS1-004	SDCBP2-AS1	1	0	1	1	3
hsa-miR-423-5p	MIMAT0004748	ENSG00000261959	ENST00000572855	RP11-893F2.14-001	RP11-893F2.14	1	0	1	1	3
hsa-miR-423-5p	MIMAT0004748	ENSG00000214851	ENST00000538094	LINC00612-001	LINC00612	1	0	1	1	3
hsa-miR-423-5p	MIMAT0004748	ENSG00000275805	ENST00000615734	RP11-349H17.2-001	RP11-349H17.2	1	0	1	1	3
hsa-miR-423-5p	MIMAT0004748	ENSG00000186235	ENST00000470346	AC016757.3-001	AC016757.3	1	0	1	1	3
hsa-miR-423-5p	MIMAT0004748	ENSG00000231252	ENST00000423403	RP11-436K8.1-001	RP11-436K8.1	1	0	1	1	3
hsa-miR-423-5p	MIMAT0004748	ENSG00000272758	ENST00000608015	RP11-299J3.8-003	RP11-299J3.8	1	0	1	1	3
hsa-miR-423-5p	MIMAT0004748	ENSG00000250764	ENST00000503441	CTD-2152M20.2-001	CTD-2152M20.2	1	0	1	1	3
hsa-miR-423-5p	MIMAT0004748	ENSG00000262528	ENST00000573609	LA16c-349E10.1-001	LA16c-349E10.1	1	0	1	1	3
hsa-miR-423-5p	MIMAT0004748	ENSG00000115934	ENST00000538297	RP11-153K16.2-001	RP11-153K16.2	1	0	1	1	3
hsa-miR-423-5p	MIMAT0004748	ENSG00000280039	ENST00000625159	CTD-2270L9.3-001	CTD-2270L9.3	1	0	1	1	3
hsa-miR-423-5p	MIMAT0004748	ENSG00000260855	ENST00000567832	RP11-439E19.10-001	RP11-439E19.10	1	0	1	1	3
hsa-miR-423-5p	MIMAT0004748	ENSG00000268530	ENST00000600650	CTC-273B12.5-004	CTC-273B12.5	1	0	1	1	3
hsa-miR-423-5p	MIMAT0004748	ENSG00000278920	ENST00000623789	RP3-412A9.17-001	RP3-412A9.17	1	0	1	1	3
hsa-miR-423-5p	MIMAT0004748	ENSG00000259605	ENST00000592217	AC074212.5-002	AC074212.5	1	0	1	1	3
hsa-miR-423-5p	MIMAT0004748	ENSG00000230010	ENST00000457009	RP4-568F9.6-001	RP4-568F9.6	1	0	1	1	3
hsa-miR-423-5p	MIMAT0004748	ENSG00000258481	ENST00000553537	RP11-472N19.3-001	RP11-472N19.3	1	0	1	1	3
hsa-miR-423-5p	MIMAT0004748	ENSG00000241014	ENST00000311990	RP11-244H3.1-001	RP11-244H3.1	1	0	1	1	3
hsa-miR-423-5p	MIMAT0004748	ENSG00000261026	ENST00000566457	CTD-3247F14.2-001	CTD-3247F14.2	1	0	1	1	3
hsa-miR-423-5p	MIMAT0004748	ENSG00000265489	ENST00000584772	RP11-1090M7.1-001	RP11-1090M7.1	1	0	1	1	3
hsa-miR-423-5p	MIMAT0004748	ENSG00000279067	ENST00000625023	GS1-25M2.1-001	GS1-25M2.1	1	0	1	1	3
hsa-miR-423-5p	MIMAT0004748	ENSG00000251136	ENST00000504145	RP11-37B2.1-005	RP11-37B2.1	1	0	1	1	3
hsa-miR-423-5p	MIMAT0004748	ENSG00000254561	ENST00000532153	RP11-196E1.3-001	RP11-196E1.3	1	0	1	1	3
hsa-miR-423-5p	MIMAT0004748	ENSG00000234456	ENST00000452320	MAGI2-AS3-007	MAGI2-AS3	1	0	1	1	3
hsa-miR-423-5p	MIMAT0004748	ENSG00000249673	ENST00000505731	NOP14-AS1-004	NOP14-AS1	1	0	1	1	3
hsa-miR-423-5p	MIMAT0004748	ENSG00000279714	ENST00000623490	CTA-212A2.2-001	CTA-212A2.2	1	0	1	1	3
hsa-miR-423-5p	MIMAT0004748	ENSG00000237556	ENST00000441125	KCND3-AS1-001	KCND3-AS1	1	0	1	1	3
hsa-miR-423-5p	MIMAT0004748	ENSG00000258017	ENST00000548149	RP11-386G11.10-002	RP11-386G11.10	1	0	1	1	3
hsa-miR-423-5p	MIMAT0004748	ENSG00000279884	ENST00000624428	RP11-483E17.1-001	RP11-483E17.1	1	0	1	1	3
hsa-miR-423-5p	MIMAT0004748	ENSG00000275898	ENST00000621942	RP11-497G19.7-001	RP11-497G19.7	1	0	1	1	3
hsa-miR-423-5p	MIMAT0004748	ENSG00000255572	ENST00000545794	RP11-273B20.3-002	RP11-273B20.3	1	0	1	1	3
hsa-miR-423-5p	MIMAT0004748	ENSG00000177340	ENST00000313737	FLJ13224-001	FLJ13224	1	0	1	1	3
hsa-miR-423-5p	MIMAT0004748	ENSG00000272780	ENST00000426261	RP11-822E23.8-001	RP11-822E23.8	1	0	1	1	3
hsa-miR-423-5p	MIMAT0004748	ENSG00000280777	ENST00000627796	HYMAI-001	HYMAI	1	0	1	1	3
hsa-miR-423-5p	MIMAT0004748	ENSG00000268049	ENST00000599952	CTD-2619J13.9-001	CTD-2619J13.9	1	0	1	1	3
hsa-miR-423-5p	MIMAT0004748	ENSG00000249231	ENST00000565755	CASC16-002	CASC16	1	0	1	1	3
hsa-miR-423-5p	MIMAT0004748	ENSG00000279404	ENST00000623035	CTD-2542C24.5-001	CTD-2542C24.5	1	0	1	1	3
hsa-miR-423-5p	MIMAT0004748	ENSG00000226567	ENST00000412578	LINC00606-001	LINC00606	1	0	1	1	3
hsa-miR-423-5p	MIMAT0004748	ENSG00000243766	ENST00000472494	HOTTIP-005	HOTTIP	1	0	1	1	3
hsa-miR-423-5p	MIMAT0004748	ENSG00000215859	ENST00000401008	RP6-74O6.2-001	RP6-74O6.2	1	0	1	1	3
hsa-miR-423-5p	MIMAT0004748	ENSG00000267397	ENST00000590983	RP11-873E20.1-001	RP11-873E20.1	1	0	1	1	3
hsa-miR-423-5p	MIMAT0004748	ENSG00000253636	ENST00000517664	RP11-531A24.5-001	RP11-531A24.5	1	0	1	1	3
hsa-miR-423-5p	MIMAT0004748	ENSG00000281591	ENST00000630918	DBET-001	DBET	1	0	1	1	3
hsa-miR-423-5p	MIMAT0004748	ENSG00000227947	ENST00000454285	RP11-543D5.1-001	RP11-543D5.1	1	0	1	1	3
hsa-miR-423-5p	MIMAT0004748	ENSG00000259635	ENST00000560387	AC100830.3-001	AC100830.3	1	0	1	1	3
hsa-miR-423-5p	MIMAT0004748	ENSG00000225855	ENST00000543656	RUSC1-AS1-201	RUSC1-AS1	1	0	1	1	3
hsa-miR-423-5p	MIMAT0004748	ENSG00000244479	ENST00000487102	OR2A1-AS1-013	OR2A1-AS1	1	0	1	1	3
hsa-miR-423-5p	MIMAT0004748	ENSG00000258498	ENST00000556266	DIO3OS-016	DIO3OS	1	0	1	1	3
hsa-miR-423-5p	MIMAT0004748	ENSG00000280214	ENST00000623147	CTD-2012K14.5-001	CTD-2012K14.5	1	0	1	1	3
hsa-miR-423-5p	MIMAT0004748	ENSG00000229356	ENST00000426578	LRRC3-AS1-001	LRRC3-AS1	1	0	1	1	3
hsa-miR-423-5p	MIMAT0004748	ENSG00000231721	ENST00000431189	LINC-PINT-007	LINC-PINT	1	0	1	1	3
hsa-miR-423-5p	MIMAT0004748	ENSG00000224186	ENST00000554670	C5orf66-006	C5orf66	1	0	1	1	3
hsa-miR-423-5p	MIMAT0004748	ENSG00000249695	ENST00000505893	RP11-598F7.4-003	RP11-598F7.4	1	0	1	1	3
hsa-miR-423-5p	MIMAT0004748	ENSG00000267719	ENST00000592718	HP09025-001	HP09025	1	0	1	1	3
hsa-miR-423-5p	MIMAT0004748	ENSG00000235050	ENST00000592236	MLIP-AS1-008	MLIP-AS1	1	0	1	1	3
hsa-miR-423-5p	MIMAT0004748	ENSG00000261218	ENST00000569731	RP11-960L18.1-006	RP11-960L18.1	1	0	1	1	3
hsa-miR-423-5p	MIMAT0004748	ENSG00000279249	ENST00000623424	RP11-491F9.3-001	RP11-491F9.3	1	0	1	1	3
hsa-miR-423-5p	MIMAT0004748	ENSG00000259964	ENST00000564562	THSD4-AS1-005	THSD4-AS1	1	0	1	1	3
hsa-miR-423-5p	MIMAT0004748	ENSG00000251331	ENST00000514050	RP11-689K5.3-002	RP11-689K5.3	1	0	1	1	3
hsa-miR-423-5p	MIMAT0004748	ENSG00000279910	ENST00000623972	RP11-113E21.2-001	RP11-113E21.2	1	0	1	1	3
hsa-miR-423-5p	MIMAT0004748	ENSG00000215023	ENST00000437438	AC114730.5-001	AC114730.5	1	0	1	1	3
hsa-miR-423-5p	MIMAT0004748	ENSG00000236519	ENST00000417820	LINC01424-001	LINC01424	1	0	1	1	3
hsa-miR-423-5p	MIMAT0004748	ENSG00000258819	ENST00000557526	RP11-7F17.3-001	RP11-7F17.3	1	0	1	1	3
hsa-miR-423-5p	MIMAT0004748	ENSG00000272808	ENST00000431060	RP11-66B24.7-001	RP11-66B24.7	1	0	1	1	3
hsa-miR-423-5p	MIMAT0004748	ENSG00000237159	ENST00000438244	CNTFR-AS1-003	CNTFR-AS1	1	0	1	1	3
hsa-miR-423-5p	MIMAT0004748	ENSG00000205611	ENST00000380888	RP4-610C12.4-001	RP4-610C12.4	1	0	1	1	3
hsa-miR-423-5p	MIMAT0004748	ENSG00000231898	ENST00000630733	AC012594.1-072	AC012594.1	1	0	1	1	3
hsa-miR-423-5p	MIMAT0004748	ENSG00000259459	ENST00000559821	RP11-321G12.1-002	RP11-321G12.1	1	0	1	1	3
hsa-miR-423-5p	MIMAT0004748	ENSG00000270016	ENST00000602595	RP11-932O9.8-001	RP11-932O9.8	1	0	1	1	3
hsa-miR-423-5p	MIMAT0004748	ENSG00000255043	ENST00000528726	NAV2-AS5-001	NAV2-AS5	1	0	1	1	3
hsa-miR-423-5p	MIMAT0004748	ENSG00000280078	ENST00000624275	RP11-361H10.5-001	RP11-361H10.5	1	0	1	1	3
hsa-miR-423-5p	MIMAT0004748	ENSG00000224046	ENST00000446309	AC005076.5-002	AC005076.5	1	0	1	1	3
hsa-miR-423-5p	MIMAT0004748	ENSG00000268628	ENST00000598007	RP1-122P22.4-001	RP1-122P22.4	1	0	1	1	3
hsa-miR-423-5p	MIMAT0004748	ENSG00000235527	ENST00000427953	HIPK1-AS1-002	HIPK1-AS1	1	0	1	1	3
hsa-miR-423-5p	MIMAT0004748	ENSG00000225880	ENST00000473798	LINC00115-001	LINC00115	1	0	1	1	3
hsa-miR-423-5p	MIMAT0004748	ENSG00000261606	ENST00000564823	RP11-414J4.2-002	RP11-414J4.2	1	0	1	1	3
hsa-miR-423-5p	MIMAT0004748	ENSG00000180066	ENST00000321248	C10orf91-201	C10orf91	1	0	1	1	3
hsa-miR-423-5p	MIMAT0004748	ENSG00000260367	ENST00000567209	RP11-264B17.4-001	RP11-264B17.4	1	0	1	1	3
hsa-miR-423-5p	MIMAT0004748	ENSG00000222041	ENST00000612724	LINC00152-013	LINC00152	1	0	1	1	3
hsa-miR-423-5p	MIMAT0004748	ENSG00000229401	ENST00000366312	RP1-290I10.7-002	RP1-290I10.7	1	0	1	1	3
hsa-miR-423-5p	MIMAT0004748	ENSG00000248730	ENST00000512496	EGFLAM-AS4-001	EGFLAM-AS4	1	0	1	1	3
hsa-miR-423-5p	MIMAT0004748	ENSG00000269289	ENST00000598914	CTB-92J24.3-002	CTB-92J24.3	1	0	1	1	3
hsa-miR-423-5p	MIMAT0004748	ENSG00000226122	ENST00000454521	DDC-AS1-001	DDC-AS1	1	0	1	1	3
hsa-miR-423-5p	MIMAT0004748	ENSG00000226791	ENST00000419865	AC109826.1-001	AC109826.1	1	0	1	1	3
hsa-miR-423-5p	MIMAT0004748	ENSG00000231119	ENST00000413818	RP4-569M23.2-001	RP4-569M23.2	1	0	1	1	3
hsa-miR-423-5p	MIMAT0004748	ENSG00000223598	ENST00000415477	RP1-292B18.4-001	RP1-292B18.4	1	0	1	1	3
hsa-miR-423-5p	MIMAT0004748	ENSG00000183643	ENST00000624458	C15orf32-001	C15orf32	1	0	1	1	3
hsa-miR-423-5p	MIMAT0004748	ENSG00000241490	ENST00000481773	RP11-553L6.2-001	RP11-553L6.2	1	0	1	1	3
hsa-miR-423-5p	MIMAT0004748	ENSG00000280401	ENST00000624563	RP11-104F15.9-001	RP11-104F15.9	1	0	1	1	3
hsa-miR-423-5p	MIMAT0004748	ENSG00000233828	ENST00000445770	CTC-242N15.1-002	CTC-242N15.1	1	0	1	1	3
hsa-miR-423-5p	MIMAT0004748	ENSG00000226367	ENST00000456577	ST7-AS2-001	ST7-AS2	1	0	1	1	3
hsa-miR-423-5p	MIMAT0004748	ENSG00000230487	ENST00000437621	PSMG3-AS1-001	PSMG3-AS1	1	0	1	1	3
hsa-miR-423-5p	MIMAT0004748	ENSG00000236540	ENST00000608610	AC006547.13-008	AC006547.13	1	0	1	1	3
hsa-miR-423-5p	MIMAT0004748	ENSG00000276095	ENST00000614596	AC008103.3-001	AC008103.3	1	0	1	1	3
hsa-miR-423-5p	MIMAT0004748	ENSG00000249859	ENST00000523427	PVT1-011	PVT1	1	0	1	1	3
hsa-miR-423-5p	MIMAT0004748	ENSG00000233178	ENST00000629161	RP11-88I18.2-005	RP11-88I18.2	1	0	1	1	3
hsa-miR-423-5p	MIMAT0004748	ENSG00000237181	ENST00000429872	AC147651.4-001	AC147651.4	1	0	1	1	3
hsa-miR-423-5p	MIMAT0004748	ENSG00000268181	ENST00000616616	RP11-73B2.7-001	RP11-73B2.7	1	0	1	1	3
hsa-miR-423-5p	MIMAT0004748	ENSG00000278716	ENST00000620845	LA16c-352F7.1-001	LA16c-352F7.1	1	0	1	1	3
hsa-miR-423-5p	MIMAT0004748	ENSG00000279442	ENST00000623199	LA16c-60D12.2-001	LA16c-60D12.2	1	0	1	1	3
hsa-miR-423-5p	MIMAT0004748	ENSG00000218018	ENST00000417346	RP4-800J21.3-001	RP4-800J21.3	1	0	1	1	3
hsa-miR-423-5p	MIMAT0004748	ENSG00000267440	ENST00000593169	CTC-501O10.1-001	CTC-501O10.1	1	0	1	1	3
hsa-miR-423-5p	MIMAT0004748	ENSG00000130600	ENST00000439725	H19-003	H19	1	0	1	1	3
hsa-miR-423-5p	MIMAT0004748	ENSG00000250122	ENST00000510987	CTD-2013M15.1-001	CTD-2013M15.1	1	0	1	1	3
hsa-miR-423-5p	MIMAT0004748	ENSG00000198788	ENST00000616479	MUC2-202	MUC2	1	0	1	1	3
hsa-miR-423-5p	MIMAT0004748	ENSG00000235532	ENST00000419499	LINC00402-001	LINC00402	1	0	1	1	3
hsa-miR-423-5p	MIMAT0004748	ENSG00000265126	ENST00000579897	CTB-187M2.2-001	CTB-187M2.2	1	0	1	1	3
hsa-miR-423-5p	MIMAT0004748	ENSG00000254443	ENST00000531479	RP11-304C12.3-001	RP11-304C12.3	1	0	1	1	3
hsa-miR-423-5p	MIMAT0004748	ENSG00000270641	ENST00000604411	TSIX-001	TSIX	1	0	1	1	3
hsa-miR-423-5p	MIMAT0004748	ENSG00000238035	ENST00000604354	AC138035.2-003	AC138035.2	1	0	1	1	3
hsa-miR-423-5p	MIMAT0004748	ENSG00000232907	ENST00000559455	DLGAP4-AS1-004	DLGAP4-AS1	1	0	1	1	3
hsa-miR-423-5p	MIMAT0004748	ENSG00000277420	ENST00000621489	CH17-408M7.1-001	CH17-408M7.1	1	0	1	1	3
hsa-miR-423-5p	MIMAT0004748	ENSG00000225302	ENST00000453491	RP11-539I5.1-001	RP11-539I5.1	1	0	1	1	3
hsa-miR-423-5p	MIMAT0004748	ENSG00000234912	ENST00000565256	SNHG20-008	SNHG20	1	0	1	1	3
hsa-miR-423-5p	MIMAT0004748	ENSG00000250358	ENST00000513687	RP11-159K7.2-002	RP11-159K7.2	1	0	1	1	3
hsa-miR-423-5p	MIMAT0004748	ENSG00000280254	ENST00000623798	RP11-81A22.4-001	RP11-81A22.4	1	0	1	1	3
hsa-miR-423-5p	MIMAT0004748	ENSG00000269364	ENST00000598832	LINC01233-002	LINC01233	1	0	1	1	3
hsa-miR-423-5p	MIMAT0004748	ENSG00000235770	ENST00000423530	LINC00607-002	LINC00607	1	0	1	1	3
hsa-miR-423-5p	MIMAT0004748	ENSG00000279775	ENST00000624090	RP5-1028K7.1-001	RP5-1028K7.1	1	0	1	1	3
hsa-miR-423-5p	MIMAT0004748	ENSG00000258723	ENST00000554219	RP11-332E19.2-001	RP11-332E19.2	1	0	1	1	3
hsa-miR-423-5p	MIMAT0004748	ENSG00000228794	ENST00000445118	LINC01128-001	LINC01128	1	0	1	1	3
hsa-miR-423-5p	MIMAT0004748	ENSG00000280422	ENST00000624646	RP11-155D18.13-001	RP11-155D18.13	1	0	1	1	3
hsa-miR-423-5p	MIMAT0004748	ENSG00000254100	ENST00000519764	RP11-675F6.4-001	RP11-675F6.4	1	0	1	1	3
hsa-miR-423-5p	MIMAT0004748	ENSG00000233858	ENST00000430626	AC026904.1-001	AC026904.1	1	0	1	1	3
hsa-miR-423-5p	MIMAT0004748	ENSG00000269846	ENST00000598590	RP4-621N11.2-001	RP4-621N11.2	1	0	1	1	3
hsa-miR-423-5p	MIMAT0004748	ENSG00000204754	ENST00000377300	CTC-281M20.1-001	CTC-281M20.1	1	0	1	1	3
hsa-miR-423-5p	MIMAT0004748	ENSG00000262179	ENST00000576476	RP1-302G2.5-002	RP1-302G2.5	1	0	1	1	3
hsa-miR-423-5p	MIMAT0004748	ENSG00000215190	ENST00000422882	LINC00680-002	LINC00680	1	0	1	1	3
hsa-miR-423-5p	MIMAT0004748	ENSG00000257275	ENST00000556386	RP11-164H13.1-001	RP11-164H13.1	1	0	1	1	3
hsa-miR-423-5p	MIMAT0004748	ENSG00000248309	ENST00000514011	MEF2C-AS1-001	MEF2C-AS1	1	0	1	1	3
hsa-miR-423-5p	MIMAT0004748	ENSG00000274270	ENST00000618151	RP11-34F20.7-001	RP11-34F20.7	1	0	1	1	3
hsa-miR-423-5p	MIMAT0004748	ENSG00000270074	ENST00000602981	RP11-351I21.11-001	RP11-351I21.11	1	0	1	1	3
hsa-miR-423-5p	MIMAT0004748	ENSG00000260219	ENST00000563252	RP11-347C12.10-001	RP11-347C12.10	1	0	1	1	3
hsa-miR-423-5p	MIMAT0004748	ENSG00000267455	ENST00000586453	RP11-78A19.2-001	RP11-78A19.2	1	0	1	1	3
hsa-miR-423-5p	MIMAT0004748	ENSG00000230699	ENST00000448179	RP11-54O7.1-001	RP11-54O7.1	1	0	1	1	3
hsa-miR-423-5p	MIMAT0004748	ENSG00000272157	ENST00000607735	CTD-2168K21.2-001	CTD-2168K21.2	1	0	1	1	3
hsa-miR-423-5p	MIMAT0004748	ENSG00000280122	ENST00000625040	RP11-87G24.2-001	RP11-87G24.2	1	0	1	1	3
hsa-miR-423-5p	MIMAT0004748	ENSG00000246640	ENST00000499842	RP11-1094H24.4-001	RP11-1094H24.4	1	0	1	1	3
hsa-miR-423-5p	MIMAT0004748	ENSG00000231607	ENST00000621282	DLEU2-010	DLEU2	1	0	1	1	3
hsa-miR-423-5p	MIMAT0004748	ENSG00000225931	ENST00000456687	RP3-395M20.7-001	RP3-395M20.7	1	0	1	1	3
hsa-miR-423-5p	MIMAT0004748	ENSG00000270761	ENST00000604014	RP11-385F7.1-001	RP11-385F7.1	1	0	1	1	3
hsa-miR-423-5p	MIMAT0004748	ENSG00000232117	ENST00000437721	LINC00384-001	LINC00384	1	0	1	1	3
hsa-miR-423-5p	MIMAT0004748	ENSG00000181123	ENST00000610737	RP4-539M6.14-003	RP4-539M6.14	1	0	1	1	3
hsa-miR-423-5p	MIMAT0004748	ENSG00000255274	ENST00000606951	TMPRSS4-AS1-003	TMPRSS4-AS1	1	0	1	1	3
hsa-miR-423-5p	MIMAT0004748	ENSG00000260403	ENST00000568884	RP11-616M22.1-001	RP11-616M22.1	1	0	1	1	3
hsa-miR-423-5p	MIMAT0004748	ENSG00000250385	ENST00000515085	RP11-310P5.2-001	RP11-310P5.2	1	0	1	1	3
hsa-miR-423-5p	MIMAT0004748	ENSG00000256542	ENST00000537762	RP13-895J2.3-001	RP13-895J2.3	1	0	1	1	3
hsa-miR-423-5p	MIMAT0004748	ENSG00000280277	ENST00000624924	RP1-72A23.4-001	RP1-72A23.4	1	0	1	1	3
hsa-miR-423-5p	MIMAT0004748	ENSG00000204054	ENST00000419300	LINC00963-007	LINC00963	1	0	1	1	3
hsa-miR-423-5p	MIMAT0004748	ENSG00000259222	ENST00000559870	RP11-809H16.5-001	RP11-809H16.5	1	0	1	1	3
hsa-miR-423-5p	MIMAT0004748	ENSG00000279141	ENST00000623792	LINC01451-201	LINC01451	1	0	1	1	3
hsa-miR-423-5p	MIMAT0004748	ENSG00000214548	ENST00000424076	MEG3-009	MEG3	1	0	1	1	3
hsa-miR-423-5p	MIMAT0004748	ENSG00000233056	ENST00000617971	ERVH48-1-201	ERVH48-1	1	0	1	1	3
hsa-miR-423-5p	MIMAT0004748	ENSG00000229775	ENST00000426752	RP11-298H24.1-003	RP11-298H24.1	1	0	1	1	3
hsa-miR-423-5p	MIMAT0004748	ENSG00000250685	ENST00000536986	RP11-486L19.2-002	RP11-486L19.2	1	0	1	1	3
hsa-miR-423-5p	MIMAT0004748	ENSG00000260034	ENST00000562280	LCMT1-AS2-001	LCMT1-AS2	1	0	1	1	3
hsa-miR-423-5p	MIMAT0004748	ENSG00000188525	ENST00000340444	AC010969.1-001	AC010969.1	1	0	1	1	3
hsa-miR-423-5p	MIMAT0004748	ENSG00000279982	ENST00000623138	RP11-45A17.3-001	RP11-45A17.3	1	0	1	1	3
hsa-miR-423-5p	MIMAT0004748	ENSG00000178947	ENST00000417443	LINC00086-001	LINC00086	1	0	1	1	3
hsa-miR-423-5p	MIMAT0004748	ENSG00000281162	ENST00000627273	LINC01127-004	LINC01127	1	0	1	1	3
hsa-miR-423-5p	MIMAT0004748	ENSG00000205865	ENST00000382166	FAM99B-001	FAM99B	1	0	1	1	3
hsa-miR-423-5p	MIMAT0004748	ENSG00000248332	ENST00000506601	TUB-AS1-001	TUB-AS1	1	0	1	1	3
hsa-miR-423-5p	MIMAT0004748	ENSG00000279489	ENST00000623595	RP11-392A14.8-001	RP11-392A14.8	1	0	1	1	3
hsa-miR-423-5p	MIMAT0004748	ENSG00000249346	ENST00000506222	LINC01016-001	LINC01016	1	0	1	1	3
hsa-miR-423-5p	MIMAT0004748	ENSG00000145063	ENST00000536743	AC062028.1-002	AC062028.1	1	0	1	1	3
hsa-miR-423-5p	MIMAT0004748	ENSG00000262966	ENST00000574307	RP11-85B7.2-001	RP11-85B7.2	1	0	1	1	3
hsa-miR-423-5p	MIMAT0004748	ENSG00000246740	ENST00000499478	PLA2G4E-AS1-001	PLA2G4E-AS1	1	0	1	1	3
hsa-miR-423-5p	MIMAT0004748	ENSG00000235590	ENST00000443966	GNAS-AS1-002	GNAS-AS1	1	0	1	1	3
hsa-miR-423-5p	MIMAT0004748	ENSG00000279010	ENST00000623111	RP5-1039K5.19-001	RP5-1039K5.19	1	0	1	1	3
hsa-miR-423-5p	MIMAT0004748	ENSG00000212855	ENST00000417072	TTTY2-001	TTTY2	1	0	1	1	3
hsa-miR-423-5p	MIMAT0004748	ENSG00000238063	ENST00000452971	RP11-329N22.1-001	RP11-329N22.1	1	0	1	1	3
hsa-miR-423-5p	MIMAT0004748	ENSG00000255311	ENST00000526344	RP11-160H12.2-002	RP11-160H12.2	1	0	1	1	3
hsa-miR-423-5p	MIMAT0004748	ENSG00000279657	ENST00000624954	RP11-521H3.3-001	RP11-521H3.3	1	0	1	1	3
hsa-miR-423-5p	MIMAT0004748	ENSG00000231010	ENST00000439423	RP6-109B7.2-001	RP6-109B7.2	1	0	1	1	3
hsa-miR-423-5p	MIMAT0004748	ENSG00000253230	ENST00000517675	LINC00599-002	LINC00599	1	0	1	1	3
hsa-miR-423-5p	MIMAT0004748	ENSG00000260433	ENST00000565170	RP11-202D1.2-001	RP11-202D1.2	1	0	1	1	3
hsa-miR-423-5p	MIMAT0004748	ENSG00000256596	ENST00000539391	RP11-522N14.2-001	RP11-522N14.2	1	0	1	1	3
hsa-miR-423-5p	MIMAT0004748	ENSG00000227301	ENST00000449144	RP11-384P7.5-001	RP11-384P7.5	1	0	1	1	3
hsa-miR-423-5p	MIMAT0004748	ENSG00000261126	ENST00000568911	RP11-795F19.1-004	RP11-795F19.1	1	0	1	1	3
hsa-miR-423-5p	MIMAT0004748	ENSG00000251218	ENST00000505083	RP11-1057B8.2-001	RP11-1057B8.2	1	0	1	1	3
hsa-miR-423-5p	MIMAT0004748	ENSG00000257890	ENST00000546699	RP11-114F10.2-001	RP11-114F10.2	1	0	1	1	3
hsa-miR-423-5p	MIMAT0004748	ENSG00000214548	ENST00000524131	MEG3-021	MEG3	1	0	1	1	3
hsa-miR-423-5p	MIMAT0004748	ENSG00000259878	ENST00000565136	RP11-1O10.1-001	RP11-1O10.1	1	0	1	1	3
hsa-miR-423-5p	MIMAT0004748	ENSG00000261824	ENST00000590523	LINC00662-002	LINC00662	1	0	1	1	3
hsa-miR-423-5p	MIMAT0004748	ENSG00000236426	ENST00000457948	RP11-79M19.2-001	RP11-79M19.2	1	0	1	1	3
hsa-miR-423-5p	MIMAT0004748	ENSG00000267838	ENST00000599382	AC008746.12-001	AC008746.12	1	0	1	1	3
hsa-miR-423-5p	MIMAT0004748	ENSG00000272702	ENST00000610134	RP11-44N22.3-002	RP11-44N22.3	1	0	1	1	3
hsa-miR-423-5p	MIMAT0004748	ENSG00000280564	ENST00000563660	MAN2C1-046	MAN2C1	1	0	1	1	3
hsa-miR-423-5p	MIMAT0004748	ENSG00000273769	ENST00000614970	U52112.12-201	U52112.12	1	0	1	1	3
hsa-miR-423-5p	MIMAT0004748	ENSG00000240207	ENST00000465477	RP11-379F4.4-004	RP11-379F4.4	1	0	1	1	3
hsa-miR-423-5p	MIMAT0004748	ENSG00000249984	ENST00000503489	CTC-529L17.2-001	CTC-529L17.2	1	0	1	1	3
hsa-miR-423-5p	MIMAT0004748	ENSG00000280007	ENST00000623543	AC008079.10-001	AC008079.10	1	0	1	1	3
hsa-miR-423-5p	MIMAT0004748	ENSG00000246100	ENST00000514294	LINC00900-003	LINC00900	1	0	1	1	3
hsa-miR-423-5p	MIMAT0004748	ENSG00000272908	ENST00000609522	RP11-121A8.1-001	RP11-121A8.1	1	0	1	1	3
hsa-miR-423-5p	MIMAT0004748	ENSG00000281219	ENST00000563416	LINC00254-001	LINC00254	1	0	1	1	3
hsa-miR-423-5p	MIMAT0004748	ENSG00000261490	ENST00000561486	RP11-448G15.3-001	RP11-448G15.3	1	0	1	1	3
hsa-miR-423-5p	MIMAT0004748	ENSG00000274370	ENST00000619443	AC144831.3-001	AC144831.3	1	0	1	1	3
hsa-miR-423-5p	MIMAT0004748	ENSG00000220908	ENST00000404689	RP11-127B16.1-001	RP11-127B16.1	1	0	1	1	3
hsa-miR-423-5p	MIMAT0004748	ENSG00000267498	ENST00000587859	CTB-32O4.2-001	CTB-32O4.2	1	0	1	1	3
hsa-miR-423-5p	MIMAT0004748	ENSG00000280156	ENST00000623130	AC006548.28-001	AC006548.28	1	0	1	1	3
hsa-miR-423-5p	MIMAT0004748	ENSG00000253728	ENST00000519411	RP11-706C16.5-001	RP11-706C16.5	1	0	1	1	3
hsa-miR-423-5p	MIMAT0004748	ENSG00000233522	ENST00000419557	FAM224A-001	FAM224A	1	0	1	1	3
hsa-miR-423-5p	MIMAT0004748	ENSG00000250208	ENST00000505807	FZD10-AS1-001	FZD10-AS1	1	0	1	1	3
hsa-miR-423-5p	MIMAT0004748	ENSG00000235621	ENST00000433094	LINC00494-002	LINC00494	1	0	1	1	3
hsa-miR-423-5p	MIMAT0004748	ENSG00000248596	ENST00000515403	RP11-844P9.2-001	RP11-844P9.2	1	0	1	1	3
hsa-miR-423-5p	MIMAT0004748	ENSG00000234394	ENST00000603200	RP11-561O23.5-004	RP11-561O23.5	1	0	1	1	3
hsa-miR-423-5p	MIMAT0004748	ENSG00000232224	ENST00000431296	LINC00202-1-002	LINC00202-1	1	0	1	1	3
hsa-miR-423-5p	MIMAT0004748	ENSG00000267106	ENST00000587536	ZNF561-AS1-001	ZNF561-AS1	1	0	1	1	3
hsa-miR-423-5p	MIMAT0004748	ENSG00000275025	ENST00000620020	RP5-875H18.10-001	RP5-875H18.10	1	0	1	1	3
hsa-miR-423-5p	MIMAT0004748	ENSG00000232224	ENST00000458084	LINC00202-1-001	LINC00202-1	1	0	1	1	3
hsa-miR-423-5p	MIMAT0004748	ENSG00000259721	ENST00000558441	RP11-758N13.1-002	RP11-758N13.1	1	0	1	1	3
hsa-miR-423-5p	MIMAT0004748	ENSG00000267650	ENST00000592332	CTD-2553C6.1-001	CTD-2553C6.1	1	0	1	1	3
hsa-miR-423-5p	MIMAT0004748	ENSG00000234979	ENST00000417792	CITF22-24E5.1-001	CITF22-24E5.1	1	0	1	1	3
hsa-miR-423-5p	MIMAT0004748	ENSG00000256654	ENST00000538202	RP11-429A20.4-001	RP11-429A20.4	1	0	1	1	3
hsa-miR-423-5p	MIMAT0004748	ENSG00000269534	ENST00000596839	CTC-453G23.5-002	CTC-453G23.5	1	0	1	1	3
hsa-miR-423-5p	MIMAT0004748	ENSG00000235790	ENST00000591929	RP11-73M7.6-008	RP11-73M7.6	1	0	1	1	3
hsa-miR-423-5p	MIMAT0004748	ENSG00000228242	ENST00000627997	AC093495.4-010	AC093495.4	1	0	1	1	3
hsa-miR-423-5p	MIMAT0004748	ENSG00000234663	ENST00000435411	AC104820.2-001	AC104820.2	1	0	1	1	3
hsa-miR-423-5p	MIMAT0004748	ENSG00000260645	ENST00000569267	RP11-250B2.5-001	RP11-250B2.5	1	0	1	1	3
hsa-miR-423-5p	MIMAT0004748	ENSG00000267898	ENST00000594305	CTD-2639E6.9-002	CTD-2639E6.9	1	0	1	1	3
hsa-miR-423-5p	MIMAT0004748	ENSG00000254154	ENST00000354921	RP4-798P15.3-003	RP4-798P15.3	1	0	1	1	3
hsa-miR-423-5p	MIMAT0004748	ENSG00000233936	ENST00000420883	RP11-399H11.2-001	RP11-399H11.2	1	0	1	1	3
hsa-miR-423-5p	MIMAT0004748	ENSG00000257067	ENST00000539222	AP000797.4-002	AP000797.4	1	0	1	1	3
hsa-miR-423-5p	MIMAT0004748	ENSG00000261334	ENST00000565882	RP11-65J3.14-001	RP11-65J3.14	1	0	1	1	3
hsa-miR-423-5p	MIMAT0004748	ENSG00000205054	ENST00000430650	LINC01121-004	LINC01121	1	0	1	1	3
hsa-miR-423-5p	MIMAT0004748	ENSG00000234859	ENST00000432258	AC003958.2-002	AC003958.2	1	0	1	1	3
hsa-miR-423-5p	MIMAT0004748	ENSG00000179755	ENST00000319817	CTD-2144E22.5-001	CTD-2144E22.5	1	0	1	1	3
hsa-miR-423-5p	MIMAT0004748	ENSG00000232645	ENST00000452395	LINC01431-003	LINC01431	1	0	1	1	3
hsa-miR-423-5p	MIMAT0004748	ENSG00000093100	ENST00000476405	XXbac-B461K10.4-002	XXbac-B461K10.4	1	0	1	1	3
hsa-miR-423-5p	MIMAT0004748	ENSG00000272008	ENST00000606274	RP11-393I2.4-001	RP11-393I2.4	1	0	1	1	3
hsa-miR-423-5p	MIMAT0004748	ENSG00000264769	ENST00000580897	RP11-498C9.12-001	RP11-498C9.12	1	0	1	1	3
hsa-miR-423-5p	MIMAT0004748	ENSG00000223949	ENST00000412349	ROR1-AS1-002	ROR1-AS1	1	0	1	1	3
hsa-miR-423-5p	MIMAT0004748	ENSG00000233304	ENST00000412674	LINC01346-001	LINC01346	1	0	1	1	3
hsa-miR-423-5p	MIMAT0004748	ENSG00000281392	ENST00000629295	LINC00506-001	LINC00506	1	0	1	1	3
hsa-miR-423-5p	MIMAT0004748	ENSG00000206140	ENST00000413877	TMEM191C-005	TMEM191C	1	0	1	1	3
hsa-miR-423-5p	MIMAT0004748	ENSG00000227896	ENST00000428940	RP11-77P6.2-001	RP11-77P6.2	1	0	1	1	3
hsa-miR-423-5p	MIMAT0004748	ENSG00000259584	ENST00000560376	RP11-521C20.2-001	RP11-521C20.2	1	0	1	1	3
hsa-miR-423-5p	MIMAT0004748	ENSG00000257433	ENST00000547799	RP1-197B17.3-001	RP1-197B17.3	1	0	1	1	3
hsa-miR-423-5p	MIMAT0004748	ENSG00000261520	ENST00000565811	DLGAP1-AS5-001	DLGAP1-AS5	1	0	1	1	3
hsa-miR-423-5p	MIMAT0004748	ENSG00000236144	ENST00000589137	TMEM147-AS1-002	TMEM147-AS1	1	0	1	1	3
hsa-miR-423-5p	MIMAT0004748	ENSG00000232748	ENST00000622229	RP11-196G11.6-001	RP11-196G11.6	1	0	1	1	3
hsa-miR-423-5p	MIMAT0004748	ENSG00000260278	ENST00000564925	RP11-109G23.3-001	RP11-109G23.3	1	0	1	1	3
hsa-miR-423-5p	MIMAT0004748	ENSG00000263080	ENST00000572913	RP11-485G7.5-001	RP11-485G7.5	1	0	1	1	3
hsa-miR-423-5p	MIMAT0004748	ENSG00000272259	ENST00000606208	RP11-305P22.9-002	RP11-305P22.9	1	0	1	1	3
hsa-miR-423-5p	MIMAT0004748	ENSG00000280179	ENST00000624872	CH507-42P11.6-002	CH507-42P11.6	1	0	1	1	3
hsa-miR-423-5p	MIMAT0004748	ENSG00000233539	ENST00000487094	AC011294.3-001	AC011294.3	1	0	1	1	3
hsa-miR-423-5p	MIMAT0004748	ENSG00000226754	ENST00000458151	RP5-1024G6.5-001	RP5-1024G6.5	1	0	1	1	3
hsa-miR-423-5p	MIMAT0004748	ENSG00000245080	ENST00000501164	RP11-320N21.1-001	RP11-320N21.1	1	0	1	1	3
hsa-miR-423-5p	MIMAT0004748	ENSG00000258634	ENST00000554749	RP4-773N10.4-001	RP4-773N10.4	1	0	1	1	3
hsa-miR-423-5p	MIMAT0004748	ENSG00000174365	ENST00000421599	SNHG11-014	SNHG11	1	0	1	1	3
hsa-miR-423-5p	MIMAT0004748	ENSG00000253986	ENST00000518590	CTC-756D1.3-001	CTC-756D1.3	1	0	1	1	3
hsa-miR-423-5p	MIMAT0004748	ENSG00000224376	ENST00000418050	AC017104.6-003	AC017104.6	1	0	1	1	3
hsa-miR-423-5p	MIMAT0004748	ENSG00000256721	ENST00000542680	CACNA1C-IT3-001	CACNA1C-IT3	1	0	1	1	3
hsa-miR-423-5p	MIMAT0004748	ENSG00000235790	ENST00000624388	RP11-73M7.6-024	RP11-73M7.6	1	0	1	1	3
hsa-miR-423-5p	MIMAT0004748	ENSG00000254762	ENST00000533287	RP11-867G23.2-001	RP11-867G23.2	1	0	1	1	3
hsa-miR-423-5p	MIMAT0004748	ENSG00000234684	ENST00000609470	SDCBP2-AS1-002	SDCBP2-AS1	1	0	1	1	3
hsa-miR-423-5p	MIMAT0004748	ENSG00000257964	ENST00000550644	RP11-133N21.10-001	RP11-133N21.10	1	0	1	1	3
hsa-miR-423-5p	MIMAT0004748	ENSG00000275807	ENST00000614819	RP11-1348G14.8-001	RP11-1348G14.8	1	0	1	1	3
hsa-miR-423-5p	MIMAT0004748	ENSG00000264177	ENST00000579352	RP1-37N7.1-001	RP1-37N7.1	1	0	1	1	3
hsa-miR-423-5p	MIMAT0004748	ENSG00000280734	ENST00000625287	LINC01232-003	LINC01232	1	0	1	1	3
hsa-miR-423-5p	MIMAT0004748	ENSG00000279382	ENST00000622927	RP11-449J21.3-001	RP11-449J21.3	1	0	1	1	3
hsa-miR-423-5p	MIMAT0004748	ENSG00000215498	ENST00000421576	FAM230B-008	FAM230B	1	0	1	1	3
hsa-miR-423-5p	MIMAT0004748	ENSG00000272050	ENST00000606283	RP13-379O24.3-001	RP13-379O24.3	1	0	1	1	3
hsa-miR-423-5p	MIMAT0004748	ENSG00000268531	ENST00000594169	RP11-32B5.8-001	RP11-32B5.8	1	0	1	1	3
hsa-miR-423-5p	MIMAT0004748	ENSG00000232021	ENST00000512637	LEF1-AS1-002	LEF1-AS1	1	0	1	1	3
hsa-miR-423-5p	MIMAT0004748	ENSG00000224812	ENST00000450287	TMEM72-AS1-001	TMEM72-AS1	1	0	1	1	3
hsa-miR-423-5p	MIMAT0004748	ENSG00000234232	ENST00000609662	RP11-353N4.5-004	RP11-353N4.5	1	0	1	1	3
hsa-miR-423-5p	MIMAT0004748	ENSG00000206142	ENST00000416405	KB-1183D5.13-009	KB-1183D5.13	1	0	1	1	3
hsa-miR-423-5p	MIMAT0004748	ENSG00000260303	ENST00000570186	RP11-203B7.2-001	RP11-203B7.2	1	0	1	1	3
hsa-miR-423-5p	MIMAT0004748	ENSG00000258483	ENST00000554798	AC144835.1-001	AC144835.1	1	0	1	1	3
hsa-miR-423-5p	MIMAT0004748	ENSG00000280194	ENST00000624076	AD000864.6-001	AD000864.6	1	0	1	1	3
hsa-miR-423-5p	MIMAT0004748	ENSG00000247095	ENST00000500447	MIR210HG-001	MIR210HG	1	0	1	1	3
hsa-miR-423-5p	MIMAT0004748	ENSG00000197099	ENST00000626586	RP11-573D15.8-009	RP11-573D15.8	1	0	1	1	3
hsa-miR-423-5p	MIMAT0004748	ENSG00000241014	ENST00000417456	RP11-244H3.1-002	RP11-244H3.1	1	0	1	1	3
hsa-miR-423-5p	MIMAT0004748	ENSG00000265494	ENST00000580134	RP11-131K5.2-001	RP11-131K5.2	1	0	1	1	3
hsa-miR-423-5p	MIMAT0004748	ENSG00000273188	ENST00000607943	RP3-402G11.25-001	RP3-402G11.25	1	0	1	1	3
hsa-miR-423-5p	MIMAT0004748	ENSG00000279069	ENST00000624641	RP11-159D12.6-001	RP11-159D12.6	1	0	1	1	3
hsa-miR-423-5p	MIMAT0004748	ENSG00000251136	ENST00000519655	RP11-37B2.1-001	RP11-37B2.1	1	0	1	1	3
hsa-miR-423-5p	MIMAT0004748	ENSG00000275232	ENST00000618927	RP11-897M7.4-001	RP11-897M7.4	1	0	1	1	3
hsa-miR-423-5p	MIMAT0004748	ENSG00000238184	ENST00000413483	CD81-AS1-002	CD81-AS1	1	0	1	1	3
hsa-miR-423-5p	MIMAT0004748	ENSG00000235033	ENST00000607215	RP11-61I13.3-005	RP11-61I13.3	1	0	1	1	3
hsa-miR-423-5p	MIMAT0004748	ENSG00000224405	ENST00000450264	LINC00572-001	LINC00572	1	0	1	1	3
hsa-miR-423-5p	MIMAT0004748	ENSG00000204584	ENST00000376609	RP11-304F15.3-001	RP11-304F15.3	1	0	1	1	3
hsa-miR-423-5p	MIMAT0004748	ENSG00000273419	ENST00000608963	RP4-751H13.7-001	RP4-751H13.7	1	0	1	1	3
hsa-miR-423-5p	MIMAT0004748	ENSG00000237560	ENST00000420427	LINC01497-001	LINC01497	1	0	1	1	3
hsa-miR-423-5p	MIMAT0004748	ENSG00000214922	ENST00000399247	HLA-F-AS1-001	HLA-F-AS1	1	0	1	1	3
hsa-miR-423-5p	MIMAT0004748	ENSG00000267272	ENST00000469312	LINC01140-009	LINC01140	1	0	1	1	3
hsa-miR-423-5p	MIMAT0004748	ENSG00000268050	ENST00000599172	RP11-247A12.8-001	RP11-247A12.8	1	0	1	1	3
hsa-miR-423-5p	MIMAT0004748	ENSG00000205537	ENST00000380601	RP11-89H19.1-001	RP11-89H19.1	1	0	1	1	3
hsa-miR-423-5p	MIMAT0004748	ENSG00000231898	ENST00000627884	AC012594.1-047	AC012594.1	1	0	1	1	3
hsa-miR-423-5p	MIMAT0004748	ENSG00000259445	ENST00000559299	RP11-276M12.1-001	RP11-276M12.1	1	0	1	1	3
hsa-miR-423-5p	MIMAT0004748	ENSG00000230615	ENST00000609027	RP5-1198O20.4-006	RP5-1198O20.4	1	0	1	1	3
hsa-miR-423-5p	MIMAT0004748	ENSG00000243766	ENST00000521028	HOTTIP-001	HOTTIP	1	0	1	1	3
hsa-miR-423-5p	MIMAT0004748	ENSG00000215859	ENST00000616036	RP6-74O6.2-002	RP6-74O6.2	1	0	1	1	3
hsa-miR-423-5p	MIMAT0004748	ENSG00000228430	ENST00000590903	RP11-15B24.5-008	RP11-15B24.5	1	0	1	1	3
hsa-miR-423-5p	MIMAT0004748	ENSG00000264964	ENST00000584509	RP11-888D10.3-001	RP11-888D10.3	1	0	1	1	3
hsa-miR-423-5p	MIMAT0004748	ENSG00000230051	ENST00000413244	CTA-929C8.8-001	CTA-929C8.8	1	0	1	1	3
hsa-miR-423-5p	MIMAT0004748	ENSG00000236859	ENST00000414554	NIFK-AS1-004	NIFK-AS1	1	0	1	1	3
hsa-miR-423-5p	MIMAT0004748	ENSG00000277232	ENST00000623117	GTSE1-AS1-001	GTSE1-AS1	1	0	1	1	3
hsa-miR-423-5p	MIMAT0004748	ENSG00000261043	ENST00000561777	RP11-24M17.6-001	RP11-24M17.6	1	0	1	1	3
hsa-miR-423-5p	MIMAT0004748	ENSG00000231721	ENST00000433079	LINC-PINT-002	LINC-PINT	1	0	1	1	3
hsa-miR-423-5p	MIMAT0004748	ENSG00000224186	ENST00000555438	C5orf66-004	C5orf66	1	0	1	1	3
hsa-miR-423-5p	MIMAT0004748	ENSG00000235710	ENST00000425559	RP5-1097F14.3-001	RP5-1097F14.3	1	0	1	1	3
hsa-miR-423-5p	MIMAT0004748	ENSG00000249695	ENST00000508953	RP11-598F7.4-002	RP11-598F7.4	1	0	1	1	3
hsa-miR-423-5p	MIMAT0004748	ENSG00000245275	ENST00000524264	SAP30L-AS1-002	SAP30L-AS1	1	0	1	1	3
hsa-miR-423-5p	MIMAT0004748	ENSG00000253320	ENST00000517999	KB-1507C5.2-007	KB-1507C5.2	1	0	1	1	3
hsa-miR-423-5p	MIMAT0004748	ENSG00000255410	ENST00000526633	RP11-732A19.6-001	RP11-732A19.6	1	0	1	1	3
hsa-miR-423-5p	MIMAT0004748	ENSG00000235050	ENST00000613661	MLIP-AS1-010	MLIP-AS1	1	0	1	1	3
hsa-miR-423-5p	MIMAT0004748	ENSG00000280385	ENST00000623539	AP000648.5-001	AP000648.5	1	0	1	1	3
hsa-miR-423-5p	MIMAT0004748	ENSG00000204623	ENST00000622469	ZNRD1-AS1-201	ZNRD1-AS1	1	0	1	1	3
hsa-miR-423-5p	MIMAT0004748	ENSG00000237596	ENST00000413745	RP13-143G15.4-016	RP13-143G15.4	1	0	1	1	3
hsa-miR-423-5p	MIMAT0004748	ENSG00000234722	ENST00000416982	LINC01287-001	LINC01287	1	0	1	1	3
hsa-miR-423-5p	MIMAT0004748	ENSG00000279912	ENST00000623902	RP11-624A21.1-001	RP11-624A21.1	1	0	1	1	3
hsa-miR-423-5p	MIMAT0004748	ENSG00000267278	ENST00000585780	MAP3K14-AS1-008	MAP3K14-AS1	1	0	1	1	3
hsa-miR-423-5p	MIMAT0004748	ENSG00000177553	ENST00000376620	RP11-56N19.5-001	RP11-56N19.5	1	0	1	1	3
hsa-miR-423-5p	MIMAT0004748	ENSG00000237159	ENST00000453642	CNTFR-AS1-002	CNTFR-AS1	1	0	1	1	3
hsa-miR-423-5p	MIMAT0004748	ENSG00000229950	ENST00000420777	TFAP2A-AS1-002	TFAP2A-AS1	1	0	1	1	3
hsa-miR-423-5p	MIMAT0004748	ENSG00000261404	ENST00000569389	AC009120.4-002	AC009120.4	1	0	1	1	3
hsa-miR-423-5p	MIMAT0004748	ENSG00000259460	ENST00000559509	RP11-128A17.1-001	RP11-128A17.1	1	0	1	1	3
hsa-miR-423-5p	MIMAT0004748	ENSG00000266904	ENST00000586885	CTC-559E9.1-002	CTC-559E9.1	1	0	1	1	3
hsa-miR-423-5p	MIMAT0004748	ENSG00000240498	ENST00000580576	CDKN2B-AS1-006	CDKN2B-AS1	1	0	1	1	3
hsa-miR-423-5p	MIMAT0004748	ENSG00000227060	ENST00000434384	LINC00629-001	LINC00629	1	0	1	1	3
hsa-miR-423-5p	MIMAT0004748	ENSG00000224992	ENST00000451318	RP11-295G24.5-001	RP11-295G24.5	1	0	1	1	3
hsa-miR-423-5p	MIMAT0004748	ENSG00000255970	ENST00000542219	RP11-43N5.1-001	RP11-43N5.1	1	0	1	1	3
hsa-miR-423-5p	MIMAT0004748	ENSG00000260899	ENST00000483578	RP11-2C24.4-001	RP11-2C24.4	1	0	1	1	3
hsa-miR-423-5p	MIMAT0004748	ENSG00000268635	ENST00000598970	RP11-739B23.1-001	RP11-739B23.1	1	0	1	1	3
hsa-miR-423-5p	MIMAT0004748	ENSG00000198547	ENST00000608990	C20orf203-001	C20orf203	1	0	1	1	3
hsa-miR-423-5p	MIMAT0004748	ENSG00000235527	ENST00000441071	HIPK1-AS1-003	HIPK1-AS1	1	0	1	1	3
hsa-miR-423-5p	MIMAT0004748	ENSG00000224870	ENST00000418833	RP4-758J18.2-003	RP4-758J18.2	1	0	1	1	3
hsa-miR-423-5p	MIMAT0004748	ENSG00000180066	ENST00000392630	C10orf91-001	C10orf91	1	0	1	1	3
hsa-miR-423-5p	MIMAT0004748	ENSG00000249487	ENST00000560368	LINC01586-002	LINC01586	1	0	1	1	3
hsa-miR-423-5p	MIMAT0004748	ENSG00000272370	ENST00000607786	RP11-307L14.1-001	RP11-307L14.1	1	0	1	1	3
hsa-miR-423-5p	MIMAT0004748	ENSG00000229401	ENST00000449333	RP1-290I10.7-001	RP1-290I10.7	1	0	1	1	3
hsa-miR-423-5p	MIMAT0004748	ENSG00000280234	ENST00000623883	RP11-145P16.2-001	RP11-145P16.2	1	0	1	1	3
hsa-miR-423-5p	MIMAT0004748	ENSG00000227195	ENST00000610014	MIR663AHG-027	MIR663AHG	1	0	1	1	3
hsa-miR-423-5p	MIMAT0004748	ENSG00000257766	ENST00000550175	RP11-341G23.3-001	RP11-341G23.3	1	0	1	1	3
hsa-miR-423-5p	MIMAT0004748	ENSG00000259805	ENST00000566841	RP11-382A20.5-001	RP11-382A20.5	1	0	1	1	3
hsa-miR-423-5p	MIMAT0004748	ENSG00000267175	ENST00000590357	RP11-879F14.1-001	RP11-879F14.1	1	0	1	1	3
hsa-miR-423-5p	MIMAT0004748	ENSG00000238266	ENST00000436383	LINC00707-001	LINC00707	1	0	1	1	3
hsa-miR-423-5p	MIMAT0004748	ENSG00000226791	ENST00000622970	AC109826.1-004	AC109826.1	1	0	1	1	3
hsa-miR-423-5p	MIMAT0004748	ENSG00000233006	ENST00000621103	AC034220.3-001	AC034220.3	1	0	1	1	3
hsa-miR-423-5p	MIMAT0004748	ENSG00000255438	ENST00000526566	CTD-2653D5.1-001	CTD-2653D5.1	1	0	1	1	3
hsa-miR-423-5p	MIMAT0004748	ENSG00000277969	ENST00000612330	CTB-58E17.1-001	CTB-58E17.1	1	0	1	1	3
hsa-miR-423-5p	MIMAT0004748	ENSG00000241490	ENST00000493033	RP11-553L6.2-002	RP11-553L6.2	1	0	1	1	3
hsa-miR-423-5p	MIMAT0004748	ENSG00000229719	ENST00000413053	AP001187.9-001	AP001187.9	1	0	1	1	3
hsa-miR-423-5p	MIMAT0004748	ENSG00000230487	ENST00000437964	PSMG3-AS1-002	PSMG3-AS1	1	0	1	1	3
hsa-miR-423-5p	MIMAT0004748	ENSG00000279933	ENST00000623969	RP4-671O14.5-001	RP4-671O14.5	1	0	1	1	3
hsa-miR-423-5p	MIMAT0004748	ENSG00000264464	ENST00000582983	RP11-110H1.8-001	RP11-110H1.8	1	0	1	1	3
hsa-miR-423-5p	MIMAT0004748	ENSG00000233178	ENST00000629181	RP11-88I18.2-006	RP11-88I18.2	1	0	1	1	3
hsa-miR-423-5p	MIMAT0004748	ENSG00000237187	ENST00000503134	NR2F1-AS1-002	NR2F1-AS1	1	0	1	1	3
hsa-miR-423-5p	MIMAT0004748	ENSG00000225725	ENST00000529252	FAM66E-001	FAM66E	1	0	1	1	3
hsa-miR-423-5p	MIMAT0004748	ENSG00000280953	ENST00000626518	LINC01163-002	LINC01163	1	0	1	1	3
hsa-miR-423-5p	MIMAT0004748	ENSG00000266919	ENST00000586878	MIR3184-001	MIR3184	1	0	1	1	3
hsa-miR-423-5p	MIMAT0004748	ENSG00000230663	ENST00000458667	FAM224B-001	FAM224B	1	0	1	1	3
hsa-miR-423-5p	MIMAT0004748	ENSG00000258376	ENST00000554614	RP4-647C14.2-001	RP4-647C14.2	1	0	1	1	3
hsa-miR-423-5p	MIMAT0004748	ENSG00000260196	ENST00000568280	RP1-239B22.5-001	RP1-239B22.5	1	0	1	1	3
hsa-miR-423-5p	MIMAT0004748	ENSG00000276791	ENST00000621230	CTD-2270P14.5-001	CTD-2270P14.5	1	0	1	1	3
hsa-miR-423-5p	MIMAT0004748	ENSG00000130600	ENST00000442037	H19-015	H19	1	0	1	1	3
hsa-miR-423-5p	MIMAT0004748	ENSG00000229196	ENST00000469264	RP11-775D22.2-002	RP11-775D22.2	1	0	1	1	3
hsa-miR-423-5p	MIMAT0004748	ENSG00000273027	ENST00000609461	LL21NC02-1C16.1-001	LL21NC02-1C16.1	1	0	1	1	3
hsa-miR-423-5p	MIMAT0004748	ENSG00000244578	ENST00000483650	LINC01391-002	LINC01391	1	0	1	1	3
hsa-miR-423-5p	MIMAT0004748	ENSG00000180769	ENST00000318186	WDFY3-AS2-002	WDFY3-AS2	1	0	1	1	3
hsa-miR-423-5p	MIMAT0004748	ENSG00000230937	ENST00000433108	MIR205HG-001	MIR205HG	1	0	1	1	3
hsa-miR-423-5p	MIMAT0004748	ENSG00000232907	ENST00000559804	DLGAP4-AS1-003	DLGAP4-AS1	1	0	1	1	3
hsa-miR-423-5p	MIMAT0004748	ENSG00000234912	ENST00000566583	SNHG20-007	SNHG20	1	0	1	1	3
hsa-miR-423-5p	MIMAT0004748	ENSG00000203971	ENST00000371169	RP13-379L11.2-001	RP13-379L11.2	1	0	1	1	3
hsa-miR-423-5p	MIMAT0004748	ENSG00000227218	ENST00000590283	RP11-203J24.8-005	RP11-203J24.8	1	0	1	1	3
hsa-miR-423-5p	MIMAT0004748	ENSG00000273270	ENST00000608477	RP11-212P7.2-001	RP11-212P7.2	1	0	1	1	3
hsa-miR-423-5p	MIMAT0004748	ENSG00000235770	ENST00000445174	LINC00607-001	LINC00607	1	0	1	1	3
hsa-miR-423-5p	MIMAT0004748	ENSG00000228172	ENST00000442055	RP1-317E23.3-001	RP1-317E23.3	1	0	1	1	3
hsa-miR-423-5p	MIMAT0004748	ENSG00000258725	ENST00000554388	PRC1-AS1-002	PRC1-AS1	1	0	1	1	3
hsa-miR-423-5p	MIMAT0004748	ENSG00000223647	ENST00000416279	AL133249.1-001	AL133249.1	1	0	1	1	3
hsa-miR-423-5p	MIMAT0004748	ENSG00000184274	ENST00000441947	LINC00315-001	LINC00315	1	0	1	1	3
hsa-miR-423-5p	MIMAT0004748	ENSG00000237054	ENST00000599580	PRMT5-AS1-006	PRMT5-AS1	1	0	1	1	3
hsa-miR-423-5p	MIMAT0004748	ENSG00000248008	ENST00000500741	DYNLL1-AS1-002	DYNLL1-AS1	1	0	1	1	3
hsa-miR-423-5p	MIMAT0004748	ENSG00000278012	ENST00000616850	RP1-310O13.13-001	RP1-310O13.13	1	0	1	1	3
hsa-miR-423-5p	MIMAT0004748	ENSG00000269859	ENST00000596646	CTD-2537I9.16-001	CTD-2537I9.16	1	0	1	1	3
hsa-miR-423-5p	MIMAT0004748	ENSG00000254873	ENST00000534438	RP11-770J1.5-001	RP11-770J1.5	1	0	1	1	3
hsa-miR-423-5p	MIMAT0004748	ENSG00000215190	ENST00000450081	LINC00680-003	LINC00680	1	0	1	1	3
hsa-miR-423-5p	MIMAT0004748	ENSG00000260005	ENST00000575922	AC027601.1-002	AC027601.1	1	0	1	1	3
hsa-miR-423-5p	MIMAT0004748	ENSG00000178243	ENST00000623103	C9orf62-001	C9orf62	1	0	1	1	3
hsa-miR-423-5p	MIMAT0004748	ENSG00000223839	ENST00000592873	FAM95B1-002	FAM95B1	1	0	1	1	3
hsa-miR-423-5p	MIMAT0004748	ENSG00000268231	ENST00000596350	CTD-2560K21.6-001	CTD-2560K21.6	1	0	1	1	3
hsa-miR-423-5p	MIMAT0004748	ENSG00000227744	ENST00000455228	FLJ43879-001	FLJ43879	1	0	1	1	3
hsa-miR-423-5p	MIMAT0004748	ENSG00000231933	ENST00000608921	CTA-125H2.2-026	CTA-125H2.2	1	0	1	1	3
hsa-miR-423-5p	MIMAT0004748	ENSG00000274272	ENST00000485071	RP11-44M6.7-001	RP11-44M6.7	1	0	1	1	3
hsa-miR-423-5p	MIMAT0004748	ENSG00000279467	ENST00000624923	KB-1125A3.12-001	KB-1125A3.12	1	0	1	1	3
hsa-miR-423-5p	MIMAT0004748	ENSG00000196589	ENST00000612322	CTB-25J19.1-201	CTB-25J19.1	1	0	1	1	3
hsa-miR-423-5p	MIMAT0004748	ENSG00000231609	ENST00000412297	AC009501.4-004	AC009501.4	1	0	1	1	3
hsa-miR-423-5p	MIMAT0004748	ENSG00000265163	ENST00000579752	CDRT8-001	CDRT8	1	0	1	1	3
hsa-miR-423-5p	MIMAT0004748	ENSG00000273062	ENST00000608517	RP11-428K3.1-001	RP11-428K3.1	1	0	1	1	3
hsa-miR-423-5p	MIMAT0004748	ENSG00000254467	ENST00000532961	RP11-634B22.4-001	RP11-634B22.4	1	0	1	1	3
hsa-miR-423-5p	MIMAT0004748	ENSG00000212694	ENST00000538335	LINC01089-004	LINC01089	1	0	1	1	3
hsa-miR-423-5p	MIMAT0004748	ENSG00000249574	ENST00000515213	AC226118.1-001	AC226118.1	1	0	1	1	3
hsa-miR-423-5p	MIMAT0004748	ENSG00000253205	ENST00000521061	CTD-3046C4.1-005	CTD-3046C4.1	1	0	1	1	3
hsa-miR-423-5p	MIMAT0004748	ENSG00000236939	ENST00000436771	BAALC-AS2-001	BAALC-AS2	1	0	1	1	3
hsa-miR-423-5p	MIMAT0004748	ENSG00000260404	ENST00000567913	RP11-384K6.6-001	RP11-384K6.6	1	0	1	1	3
hsa-miR-423-5p	MIMAT0004748	ENSG00000197670	ENST00000424252	RP4-724E16.2-001	RP4-724E16.2	1	0	1	1	3
hsa-miR-423-5p	MIMAT0004748	ENSG00000214548	ENST00000429159	MEG3-001	MEG3	1	0	1	1	3
hsa-miR-423-5p	MIMAT0004748	ENSG00000260605	ENST00000568471	RP11-883G14.3-001	RP11-883G14.3	1	0	1	1	3
hsa-miR-423-5p	MIMAT0004748	ENSG00000241666	ENST00000451992	RP3-455J7.4-001	RP3-455J7.4	1	0	1	1	3
hsa-miR-423-5p	MIMAT0004748	ENSG00000272682	ENST00000609936	AC004471.10-001	AC004471.10	1	0	1	1	3
hsa-miR-423-5p	MIMAT0004748	ENSG00000224582	ENST00000434657	LINC01015-001	LINC01015	1	0	1	1	3
hsa-miR-423-5p	MIMAT0004748	ENSG00000261292	ENST00000562191	RP11-389G6.3-001	RP11-389G6.3	1	0	1	1	3
hsa-miR-423-5p	MIMAT0004748	ENSG00000230536	ENST00000453870	RP11-379C10.4-001	RP11-379C10.4	1	0	1	1	3
hsa-miR-423-5p	MIMAT0004748	ENSG00000260034	ENST00000565214	LCMT1-AS2-002	LCMT1-AS2	1	0	1	1	3
hsa-miR-423-5p	MIMAT0004748	ENSG00000276251	ENST00000618791	CTB-32O4.3-001	CTB-32O4.3	1	0	1	1	3
hsa-miR-423-5p	MIMAT0004748	ENSG00000249923	ENST00000506039	XXbac-B444P24.8-001	XXbac-B444P24.8	1	0	1	1	3
hsa-miR-423-5p	MIMAT0004748	ENSG00000235351	ENST00000435195	AC114730.11-001	AC114730.11	1	0	1	1	3
hsa-miR-423-5p	MIMAT0004748	ENSG00000205866	ENST00000382167	FAM99A-001	FAM99A	1	0	1	1	3
hsa-miR-423-5p	MIMAT0004748	ENSG00000270100	ENST00000602445	RP11-130L8.1-001	RP11-130L8.1	1	0	1	1	3
hsa-miR-423-5p	MIMAT0004748	ENSG00000145063	ENST00000544306	AC062028.1-001	AC062028.1	1	0	1	1	3
hsa-miR-423-5p	MIMAT0004748	ENSG00000227131	ENST00000444731	RP11-552E20.1-001	RP11-552E20.1	1	0	1	1	3
hsa-miR-423-5p	MIMAT0004748	ENSG00000203506	ENST00000366321	RBMS3-AS2-001	RBMS3-AS2	1	0	1	1	3
hsa-miR-423-5p	MIMAT0004748	ENSG00000248567	ENST00000507156	RP11-545L5.1-001	RP11-545L5.1	1	0	1	1	3
hsa-miR-423-5p	MIMAT0004748	ENSG00000261664	ENST00000564479	TTC39A-AS1-002	TTC39A-AS1	1	0	1	1	3
hsa-miR-423-5p	MIMAT0004748	ENSG00000212856	ENST00000450591	TTTY2B-001	TTTY2B	1	0	1	1	3
hsa-miR-423-5p	MIMAT0004748	ENSG00000259704	ENST00000558221	CTD-3094K11.1-001	CTD-3094K11.1	1	0	1	1	3
hsa-miR-423-5p	MIMAT0004748	ENSG00000274961	ENST00000610729	RP3-492J12.2-001	RP3-492J12.2	1	0	1	1	3
hsa-miR-423-5p	MIMAT0004748	ENSG00000253230	ENST00000518557	LINC00599-003	LINC00599	1	0	1	1	3
hsa-miR-423-5p	MIMAT0004748	ENSG00000260439	ENST00000567820	LMF1-AS1-002	LMF1-AS1	1	0	1	1	3
hsa-miR-423-5p	MIMAT0004748	ENSG00000279159	ENST00000624945	RP3-394A18.1-001	RP3-394A18.1	1	0	1	1	3
hsa-miR-423-5p	MIMAT0004748	ENSG00000273333	ENST00000559458	XXbac-BPG300A18.13-001	XXbac-BPG300A18.13	1	0	1	1	3
hsa-miR-423-5p	MIMAT0004748	ENSG00000214548	ENST00000554639	MEG3-026	MEG3	1	0	1	1	3
hsa-miR-423-5p	MIMAT0004748	ENSG00000248839	ENST00000502999	RP11-227H4.5-001	RP11-227H4.5	1	0	1	1	3
hsa-miR-423-5p	MIMAT0004748	ENSG00000267243	ENST00000585697	AC005307.3-007	AC005307.3	1	0	1	1	3
hsa-miR-423-5p	MIMAT0004748	ENSG00000233080	ENST00000423311	LINC01399-001	LINC01399	1	0	1	1	3
hsa-miR-423-5p	MIMAT0004748	ENSG00000248115	ENST00000508813	RP11-752D24.2-002	RP11-752D24.2	1	0	1	1	3
hsa-miR-423-5p	MIMAT0004748	ENSG00000225548	ENST00000414382	AC098973.2-002	AC098973.2	1	0	1	1	3
hsa-miR-423-5p	MIMAT0004748	ENSG00000204934	ENST00000461019	ATP6V0E2-AS1-001	ATP6V0E2-AS1	1	0	1	1	3
hsa-miR-423-5p	MIMAT0004748	ENSG00000231898	ENST00000593861	AC012594.1-015	AC012594.1	1	0	1	1	3
hsa-miR-423-5p	MIMAT0004748	ENSG00000273769	ENST00000618311	U52112.12-001	U52112.12	1	0	1	1	3
hsa-miR-423-5p	MIMAT0004748	ENSG00000234810	ENST00000422374	RP11-466L17.1-001	RP11-466L17.1	1	0	1	1	3
hsa-miR-423-5p	MIMAT0004748	ENSG00000179406	ENST00000421767	LINC00174-001	LINC00174	1	0	1	1	3
hsa-miR-423-5p	MIMAT0004748	ENSG00000240207	ENST00000468242	RP11-379F4.4-003	RP11-379F4.4	1	0	1	1	3
hsa-miR-423-5p	MIMAT0004748	ENSG00000231421	ENST00000436477	AC006050.2-001	AC006050.2	1	0	1	1	3
hsa-miR-423-5p	MIMAT0004748	ENSG00000246100	ENST00000535683	LINC00900-004	LINC00900	1	0	1	1	3
hsa-miR-423-5p	MIMAT0004748	ENSG00000189223	ENST00000422956	PAX8-AS1-002	PAX8-AS1	1	0	1	1	3
hsa-miR-423-5p	MIMAT0004748	ENSG00000260807	ENST00000565467	RP11-161M6.2-001	RP11-161M6.2	1	0	1	1	3
hsa-miR-423-5p	MIMAT0004748	ENSG00000270127	ENST00000602585	RP11-526I2.5-001	RP11-526I2.5	1	0	1	1	3
hsa-miR-423-5p	MIMAT0004748	ENSG00000151303	ENST00000444431	RP11-96C23.13-001	RP11-96C23.13	1	0	1	1	3
hsa-miR-423-5p	MIMAT0004748	ENSG00000246863	ENST00000499797	RP11-325N19.3-001	RP11-325N19.3	1	0	1	1	3
hsa-miR-423-5p	MIMAT0004748	ENSG00000250208	ENST00000509760	FZD10-AS1-002	FZD10-AS1	1	0	1	1	3
hsa-miR-423-5p	MIMAT0004748	ENSG00000235621	ENST00000545181	LINC00494-201	LINC00494	1	0	1	1	3
hsa-miR-423-5p	MIMAT0004748	ENSG00000237372	ENST00000617436	UNQ6494-003	UNQ6494	1	0	1	1	3
hsa-miR-423-5p	MIMAT0004748	ENSG00000248599	ENST00000514926	FLJ42969-001	FLJ42969	1	0	1	1	3
hsa-miR-423-5p	MIMAT0004748	ENSG00000225978	ENST00000433161	HAR1A-001	HAR1A	1	0	1	1	3
hsa-miR-423-5p	MIMAT0004748	ENSG00000257621	ENST00000555707	PSMA3-AS1-003	PSMA3-AS1	1	0	1	1	3
hsa-miR-423-5p	MIMAT0004748	ENSG00000261693	ENST00000569285	RP13-467H17.1-001	RP13-467H17.1	1	0	1	1	3
hsa-miR-423-5p	MIMAT0004748	ENSG00000213742	ENST00000414393	ZNF337-AS1-004	ZNF337-AS1	1	0	1	1	3
hsa-miR-423-5p	MIMAT0004748	ENSG00000232224	ENST00000458682	LINC00202-1-003	LINC00202-1	1	0	1	1	3
hsa-miR-423-5p	MIMAT0004748	ENSG00000270988	ENST00000605539	RP11-439C15.5-001	RP11-439C15.5	1	0	1	1	3
hsa-miR-423-5p	MIMAT0004748	ENSG00000231031	ENST00000492352	AC008271.1-001	AC008271.1	1	0	1	1	3
hsa-miR-423-5p	MIMAT0004748	ENSG00000245008	ENST00000501648	RP11-744N12.3-001	RP11-744N12.3	1	0	1	1	3
hsa-miR-423-5p	MIMAT0004748	ENSG00000263590	ENST00000424684	RP11-403I13.7-002	RP11-403I13.7	1	0	1	1	3
hsa-miR-423-5p	MIMAT0004748	ENSG00000267651	ENST00000589715	RP11-95O2.1-001	RP11-95O2.1	1	0	1	1	3
hsa-miR-423-5p	MIMAT0004748	ENSG00000225378	ENST00000420852	AC015977.6-001	AC015977.6	1	0	1	1	3
hsa-miR-423-5p	MIMAT0004748	ENSG00000250451	ENST00000505700	HOXC-AS1-001	HOXC-AS1	1	0	1	1	3
hsa-miR-423-5p	MIMAT0004748	ENSG00000280326	ENST00000624905	RP11-642A1.1-001	RP11-642A1.1	1	0	1	1	3
hsa-miR-423-5p	MIMAT0004748	ENSG00000253973	ENST00000521394	RP11-467K18.2-002	RP11-467K18.2	1	0	1	1	3
hsa-miR-423-5p	MIMAT0004748	ENSG00000261170	ENST00000567148	RP11-252A24.5-001	RP11-252A24.5	1	0	1	1	3
hsa-miR-423-5p	MIMAT0004748	ENSG00000279184	ENST00000623959	RP3-323A16.1-001	RP3-323A16.1	1	0	1	1	3
hsa-miR-423-5p	MIMAT0004748	ENSG00000235790	ENST00000593188	RP11-73M7.6-006	RP11-73M7.6	1	0	1	1	3
hsa-miR-423-5p	MIMAT0004748	ENSG00000273361	ENST00000608367	RP11-378A13.2-001	RP11-378A13.2	1	0	1	1	3
hsa-miR-423-5p	MIMAT0004748	ENSG00000228242	ENST00000628412	AC093495.4-017	AC093495.4	1	0	1	1	3
hsa-miR-423-5p	MIMAT0004748	ENSG00000257920	ENST00000547515	RP11-541G9.2-001	RP11-541G9.2	1	0	1	1	3
hsa-miR-423-5p	MIMAT0004748	ENSG00000255528	ENST00000526041	RP11-25I9.2-001	RP11-25I9.2	1	0	1	1	3
hsa-miR-423-5p	MIMAT0004748	ENSG00000267898	ENST00000599784	CTD-2639E6.9-001	CTD-2639E6.9	1	0	1	1	3
hsa-miR-423-5p	MIMAT0004748	ENSG00000235151	ENST00000442867	AC114730.2-001	AC114730.2	1	0	1	1	3
hsa-miR-423-5p	MIMAT0004748	ENSG00000280703	ENST00000630916	RP11-275E15.3-001	RP11-275E15.3	1	0	1	1	3
hsa-miR-423-5p	MIMAT0004748	ENSG00000237125	ENST00000508534	HAND2-AS1-005	HAND2-AS1	1	0	1	1	3
hsa-miR-423-5p	MIMAT0004748	ENSG00000248152	ENST00000508959	RP11-650J17.1-001	RP11-650J17.1	1	0	1	1	3
hsa-miR-423-5p	MIMAT0004748	ENSG00000254154	ENST00000464428	RP4-798P15.3-001	RP4-798P15.3	1	0	1	1	3
hsa-miR-423-5p	MIMAT0004748	ENSG00000278309	ENST00000612156	RP11-102K13.5-001	RP11-102K13.5	1	0	1	1	3
hsa-miR-423-5p	MIMAT0004748	ENSG00000233937	ENST00000417281	CTC-338M12.4-002	CTC-338M12.4	1	0	1	1	3
hsa-miR-423-5p	MIMAT0004748	ENSG00000241769	ENST00000609314	LINC00893-010	LINC00893	1	0	1	1	3
hsa-miR-423-5p	MIMAT0004748	ENSG00000261335	ENST00000565271	RP11-318A15.2-001	RP11-318A15.2	1	0	1	1	3
hsa-miR-423-5p	MIMAT0004748	ENSG00000235954	ENST00000454741	TTC28-AS1-001	TTC28-AS1	1	0	1	1	3
hsa-miR-423-5p	MIMAT0004748	ENSG00000279361	ENST00000623200	RP11-360N9.3-001	RP11-360N9.3	1	0	1	1	3
hsa-miR-423-5p	MIMAT0004748	ENSG00000243389	ENST00000414784	AC012442.5-001	AC012442.5	1	0	1	1	3
hsa-miR-423-5p	MIMAT0004748	ENSG00000099869	ENST00000381361	IGF2-AS-001	IGF2-AS	1	0	1	1	3
hsa-miR-423-5p	MIMAT0004748	ENSG00000264772	ENST00000581621	RP11-186B7.4-001	RP11-186B7.4	1	0	1	1	3
hsa-miR-423-5p	MIMAT0004748	ENSG00000223949	ENST00000424995	ROR1-AS1-001	ROR1-AS1	1	0	1	1	3
hsa-miR-423-5p	MIMAT0004748	ENSG00000260834	ENST00000567058	RP11-256I9.2-001	RP11-256I9.2	1	0	1	1	3
hsa-miR-423-5p	MIMAT0004748	ENSG00000225791	ENST00000605910	TRAM2-AS1-004	TRAM2-AS1	1	0	1	1	3
hsa-miR-423-5p	MIMAT0004748	ENSG00000272940	ENST00000609758	CTA-384D8.33-001	CTA-384D8.33	1	0	1	1	3
hsa-miR-423-5p	MIMAT0004748	ENSG00000281392	ENST00000630120	LINC00506-004	LINC00506	1	0	1	1	3
hsa-miR-423-5p	MIMAT0004748	ENSG00000232006	ENST00000609382	AC005537.2-002	AC005537.2	1	0	1	1	3
hsa-miR-423-5p	MIMAT0004748	ENSG00000267012	ENST00000592270	CTC-360P9.1-001	CTC-360P9.1	1	0	1	1	3
hsa-miR-423-5p	MIMAT0004748	ENSG00000224761	ENST00000419779	RP11-508N22.9-001	RP11-508N22.9	1	0	1	1	3
hsa-miR-423-5p	MIMAT0004748	ENSG00000236144	ENST00000590125	TMEM147-AS1-005	TMEM147-AS1	1	0	1	1	3
hsa-miR-423-5p	MIMAT0004748	ENSG00000232749	ENST00000422010	RP11-15B24.4-001	RP11-15B24.4	1	0	1	1	3
hsa-miR-423-5p	MIMAT0004748	ENSG00000249395	ENST00000504531	CASC9-001	CASC9	1	0	1	1	3
hsa-miR-423-5p	MIMAT0004748	ENSG00000272259	ENST00000607802	RP11-305P22.9-001	RP11-305P22.9	1	0	1	1	3
hsa-miR-423-5p	MIMAT0004748	ENSG00000280180	ENST00000623041	RP11-244B22.10-001	RP11-244B22.10	1	0	1	1	3
hsa-miR-423-5p	MIMAT0004748	ENSG00000240889	ENST00000465466	NDUFB2-AS1-001	NDUFB2-AS1	1	0	1	1	3
hsa-miR-423-5p	MIMAT0004748	ENSG00000227165	ENST00000628194	WDR11-AS1-007	WDR11-AS1	1	0	1	1	3
hsa-miR-423-5p	MIMAT0004748	ENSG00000235652	ENST00000606388	RP11-545I5.3-006	RP11-545I5.3	1	0	1	1	3
hsa-miR-423-5p	MIMAT0004748	ENSG00000224149	ENST00000427892	RP11-510C10.3-001	RP11-510C10.3	1	0	1	1	3
hsa-miR-423-5p	MIMAT0004748	ENSG00000226026	ENST00000421762	RP11-57H12.3-001	RP11-57H12.3	1	0	1	1	3
hsa-miR-423-5p	MIMAT0004748	ENSG00000230223	ENST00000424524	ATXN8OS-001	ATXN8OS	1	0	1	1	3
hsa-miR-423-5p	MIMAT0004748	ENSG00000213963	ENST00000397057	AC074286.1-001	AC074286.1	1	0	1	1	3
hsa-miR-423-5p	MIMAT0004748	ENSG00000174365	ENST00000432153	SNHG11-005	SNHG11	1	0	1	1	3
hsa-miR-423-5p	MIMAT0004748	ENSG00000204283	ENST00000374983	FLJ45079-001	FLJ45079	1	0	1	1	3
hsa-miR-423-5p	MIMAT0004748	ENSG00000224376	ENST00000454416	AC017104.6-002	AC017104.6	1	0	1	1	3
hsa-miR-423-5p	MIMAT0004748	ENSG00000259921	ENST00000563495	AC022819.3-001	AC022819.3	1	0	1	1	3
hsa-miR-423-5p	MIMAT0004748	ENSG00000257985	ENST00000546738	RP1-228P16.4-001	RP1-228P16.4	1	0	1	1	3
hsa-miR-423-5p	MIMAT0004748	ENSG00000237125	ENST00000515310	HAND2-AS1-027	HAND2-AS1	1	0	1	1	3
hsa-miR-423-5p	MIMAT0004748	ENSG00000229867	ENST00000454260	STEAP3-AS1-001	STEAP3-AS1	1	0	1	1	3
hsa-miR-423-5p	MIMAT0004748	ENSG00000224652	ENST00000457079	LINC00885-001	LINC00885	1	0	1	1	3
hsa-miR-423-5p	MIMAT0004748	ENSG00000249198	ENST00000502647	RP11-772C9.1-001	RP11-772C9.1	1	0	1	1	3
hsa-miR-423-5p	MIMAT0004748	ENSG00000226519	ENST00000432331	LINC00390-001	LINC00390	1	0	1	1	3
hsa-miR-423-5p	MIMAT0004748	ENSG00000215498	ENST00000424410	FAM230B-004	FAM230B	1	0	1	1	3
hsa-miR-423-5p	MIMAT0004748	ENSG00000276517	ENST00000617415	AL133243.2-001	AL133243.2	1	0	1	1	3
hsa-miR-423-5p	MIMAT0004748	ENSG00000116883	ENST00000373137	RP11-268J15.5-001	RP11-268J15.5	1	0	1	1	3
hsa-miR-423-5p	MIMAT0004748	ENSG00000272975	ENST00000587182	MYHAS-002	MYHAS	1	0	1	1	3
hsa-miR-423-5p	MIMAT0004748	ENSG00000234232	ENST00000613574	RP11-353N4.5-001	RP11-353N4.5	1	0	1	1	3
hsa-miR-423-5p	MIMAT0004748	ENSG00000261546	ENST00000562782	CTD-2555A7.3-001	CTD-2555A7.3	1	0	1	1	3
hsa-miR-423-5p	MIMAT0004748	ENSG00000206142	ENST00000416615	KB-1183D5.13-002	KB-1183D5.13	1	0	1	1	3
hsa-miR-423-5p	MIMAT0004748	ENSG00000255182	ENST00000569326	CTD-2517M22.14-005	CTD-2517M22.14	1	0	1	1	3
hsa-miR-423-5p	MIMAT0004748	ENSG00000263165	ENST00000573371	RP11-810M2.2-001	RP11-810M2.2	1	0	1	1	3
hsa-miR-423-5p	MIMAT0004748	ENSG00000222004	ENST00000409974	C7orf71-001	C7orf71	1	0	1	1	3
hsa-miR-423-5p	MIMAT0004748	ENSG00000247095	ENST00000528245	MIR210HG-002	MIR210HG	1	0	1	1	3
hsa-miR-423-5p	MIMAT0004748	ENSG00000261030	ENST00000568788	RP11-791M20.1-001	RP11-791M20.1	1	0	1	1	3
hsa-miR-423-5p	MIMAT0004748	ENSG00000203804	ENST00000615012	ADAMTSL4-AS1-001	ADAMTSL4-AS1	1	0	1	1	3
hsa-miR-423-5p	MIMAT0004748	ENSG00000273189	ENST00000595815	CTD-3148I10.15-001	CTD-3148I10.15	1	0	1	1	3
hsa-miR-423-5p	MIMAT0004748	ENSG00000238184	ENST00000427151	CD81-AS1-001	CD81-AS1	1	0	1	1	3
hsa-miR-423-5p	MIMAT0004748	ENSG00000249673	ENST00000507999	NOP14-AS1-006	NOP14-AS1	1	0	1	1	3
hsa-miR-423-5p	MIMAT0004748	ENSG00000231074	ENST00000602550	HCG18-012	HCG18	1	0	1	1	3
hsa-miR-423-5p	MIMAT0004748	ENSG00000258661	ENST00000555107	RP11-964E11.2-001	RP11-964E11.2	1	0	1	1	3
hsa-miR-423-5p	MIMAT0004748	ENSG00000228750	ENST00000432429	RP11-242F24.1-001	RP11-242F24.1	1	0	1	1	3
hsa-miR-423-5p	MIMAT0004748	ENSG00000235033	ENST00000607675	RP11-61I13.3-004	RP11-61I13.3	1	0	1	1	3
hsa-miR-423-5p	MIMAT0004748	ENSG00000261200	ENST00000568752	RP11-989E6.10-001	RP11-989E6.10	1	0	1	1	3
hsa-miR-423-5p	MIMAT0004748	ENSG00000266213	ENST00000577382	RP11-100K18.1-001	RP11-100K18.1	1	0	1	1	3
hsa-miR-423-5p	MIMAT0004748	ENSG00000273420	ENST00000609744	CTD-2540B15.13-001	CTD-2540B15.13	1	0	1	1	3
hsa-miR-423-5p	MIMAT0004748	ENSG00000237560	ENST00000455460	LINC01497-002	LINC01497	1	0	1	1	3
hsa-miR-423-5p	MIMAT0004748	ENSG00000259944	ENST00000568256	CDRT7-001	CDRT7	1	0	1	1	3
hsa-miR-423-5p	MIMAT0004748	ENSG00000258017	ENST00000552893	RP11-386G11.10-001	RP11-386G11.10	1	0	1	1	3
hsa-miR-423-5p	MIMAT0004748	ENSG00000279886	ENST00000624708	RP11-219G17.8-001	RP11-219G17.8	1	0	1	1	3
hsa-miR-423-5p	MIMAT0004748	ENSG00000257167	ENST00000548760	TMPO-AS1-001	TMPO-AS1	1	0	1	1	3
hsa-miR-423-5p	MIMAT0004748	ENSG00000259446	ENST00000559457	RP11-489D6.2-002	RP11-489D6.2	1	0	1	1	3
hsa-miR-423-5p	MIMAT0004748	ENSG00000237832	ENST00000441428	RP5-974N19.1-001	RP5-974N19.1	1	0	1	1	3
hsa-miR-423-5p	MIMAT0004748	ENSG00000279406	ENST00000623796	RP11-327E2.5-001	RP11-327E2.5	1	0	1	1	3
hsa-miR-423-5p	MIMAT0004748	ENSG00000243766	ENST00000605136	HOTTIP-003	HOTTIP	1	0	1	1	3
hsa-miR-423-5p	MIMAT0004748	ENSG00000258301	ENST00000556072	RP11-488C13.5-001	RP11-488C13.5	1	0	1	1	3
hsa-miR-423-5p	MIMAT0004748	ENSG00000215866	ENST00000401018	LINC01356-001	LINC01356	1	0	1	1	3
hsa-miR-423-5p	MIMAT0004748	ENSG00000228430	ENST00000591117	RP11-15B24.5-011	RP11-15B24.5	1	0	1	1	3
hsa-miR-423-5p	MIMAT0004748	ENSG00000276633	ENST00000618749	AJ011931.1-001	AJ011931.1	1	0	1	1	3
hsa-miR-423-5p	MIMAT0004748	ENSG00000125804	ENST00000376398	FAM182A-001	FAM182A	1	0	1	1	3
hsa-miR-423-5p	MIMAT0004748	ENSG00000259003	ENST00000557595	AE000662.92-001	AE000662.92	1	0	1	1	3
hsa-miR-423-5p	MIMAT0004748	ENSG00000196273	ENST00000556697	LINC00523-001	LINC00523	1	0	1	1	3
hsa-miR-423-5p	MIMAT0004748	ENSG00000260879	ENST00000564063	RP11-483I13.5-001	RP11-483I13.5	1	0	1	1	3
hsa-miR-423-5p	MIMAT0004748	ENSG00000268592	ENST00000606915	RAET1E-AS1-001	RAET1E-AS1	1	0	1	1	3
hsa-miR-423-5p	MIMAT0004748	ENSG00000227953	ENST00000421003	LINC01341-001	LINC01341	1	0	1	1	3
hsa-miR-423-5p	MIMAT0004748	ENSG00000232046	ENST00000433396	AC007392.3-001	AC007392.3	1	0	1	1	3
hsa-miR-423-5p	MIMAT0004748	ENSG00000254389	ENST00000518049	RHPN1-AS1-001	RHPN1-AS1	1	0	1	1	3
hsa-miR-423-5p	MIMAT0004748	ENSG00000261578	ENST00000566747	RP11-21L23.2-001	RP11-21L23.2	1	0	1	1	3
hsa-miR-423-5p	MIMAT0004748	ENSG00000258498	ENST00000557532	DIO3OS-002	DIO3OS	1	0	1	1	3
hsa-miR-423-5p	MIMAT0004748	ENSG00000267568	ENST00000563583	RP11-87G24.3-003	RP11-87G24.3	1	0	1	1	3
hsa-miR-423-5p	MIMAT0004748	ENSG00000225231	ENST00000412084	AC091814.2-001	AC091814.2	1	0	1	1	3
hsa-miR-423-5p	MIMAT0004748	ENSG00000227195	ENST00000600225	MIR663AHG-010	MIR663AHG	1	0	1	1	3
hsa-miR-423-5p	MIMAT0004748	ENSG00000231721	ENST00000435523	LINC-PINT-005	LINC-PINT	1	0	1	1	3
hsa-miR-423-5p	MIMAT0004748	ENSG00000267149	ENST00000585492	CTC-550B14.6-001	CTC-550B14.6	1	0	1	1	3
hsa-miR-423-5p	MIMAT0004748	ENSG00000267723	ENST00000592263	CTD-2189E23.1-001	CTD-2189E23.1	1	0	1	1	3
hsa-miR-423-5p	MIMAT0004748	ENSG00000254042	ENST00000522615	CTC-558O2.1-001	CTC-558O2.1	1	0	1	1	3
hsa-miR-423-5p	MIMAT0004748	ENSG00000204625	ENST00000376800	HCG9-001	HCG9	1	0	1	1	3
hsa-miR-423-5p	MIMAT0004748	ENSG00000249859	ENST00000517790	PVT1-007	PVT1	1	0	1	1	3
hsa-miR-423-5p	MIMAT0004748	ENSG00000229950	ENST00000443546	TFAP2A-AS1-001	TFAP2A-AS1	1	0	1	1	3
hsa-miR-423-5p	MIMAT0004748	ENSG00000259462	ENST00000560650	CPEB1-AS1-001	CPEB1-AS1	1	0	1	1	3
hsa-miR-423-5p	MIMAT0004748	ENSG00000234072	ENST00000447070	AC074117.10-001	AC074117.10	1	0	1	1	3
hsa-miR-423-5p	MIMAT0004748	ENSG00000243836	ENST00000489632	WDR86-AS1-003	WDR86-AS1	1	0	1	1	3
hsa-miR-423-5p	MIMAT0004748	ENSG00000251562	ENST00000616691	MALAT1-017	MALAT1	1	0	1	1	3
hsa-miR-423-5p	MIMAT0004748	ENSG00000258334	ENST00000553259	RP11-161H23.9-001	RP11-161H23.9	1	0	1	1	3
hsa-miR-423-5p	MIMAT0004748	ENSG00000227060	ENST00000592070	LINC00629-002	LINC00629	1	0	1	1	3
hsa-miR-423-5p	MIMAT0004748	ENSG00000246379	ENST00000569025	RP11-461O7.1-002	RP11-461O7.1	1	0	1	1	3
hsa-miR-423-5p	MIMAT0004748	ENSG00000233397	ENST00000432251	AC008063.3-001	AC008063.3	1	0	1	1	3
hsa-miR-423-5p	MIMAT0004748	ENSG00000235527	ENST00000450706	HIPK1-AS1-001	HIPK1-AS1	1	0	1	1	3
hsa-miR-423-5p	MIMAT0004748	ENSG00000206567	ENST00000454232	AC022007.5-004	AC022007.5	1	0	1	1	3
hsa-miR-423-5p	MIMAT0004748	ENSG00000277324	ENST00000621167	RP11-850A17.1-001	RP11-850A17.1	1	0	1	1	3
hsa-miR-423-5p	MIMAT0004748	ENSG00000256417	ENST00000537192	RP11-1038A11.3-002	RP11-1038A11.3	1	0	1	1	3
hsa-miR-423-5p	MIMAT0004748	ENSG00000203876	ENST00000369655	ADD3-AS1-001	ADD3-AS1	1	0	1	1	3
hsa-miR-423-5p	MIMAT0004748	ENSG00000275409	ENST00000610630	RP11-131L12.4-001	RP11-131L12.4	1	0	1	1	3
hsa-miR-423-5p	MIMAT0004748	ENSG00000279756	ENST00000623305	CTD-2385L22.2-001	CTD-2385L22.2	1	0	1	1	3
hsa-miR-423-5p	MIMAT0004748	ENSG00000226791	ENST00000623301	AC109826.1-002	AC109826.1	1	0	1	1	3
hsa-miR-423-5p	MIMAT0004748	ENSG00000245385	ENST00000501918	RP11-334E6.10-001	RP11-334E6.10	1	0	1	1	3
hsa-miR-423-5p	MIMAT0004748	ENSG00000260565	ENST00000566343	CTD-2270P14.1-006	CTD-2270P14.1	1	0	1	1	3
hsa-miR-423-5p	MIMAT0004748	ENSG00000272626	ENST00000608365	RP11-468N14.13-001	RP11-468N14.13	1	0	1	1	3
hsa-miR-423-5p	MIMAT0004748	ENSG00000250608	ENST00000511699	RP11-933H2.4-002	RP11-933H2.4	1	0	1	1	3
hsa-miR-423-5p	MIMAT0004748	ENSG00000261241	ENST00000567534	RP11-883G14.1-002	RP11-883G14.1	1	0	1	1	3
hsa-miR-423-5p	MIMAT0004748	ENSG00000259981	ENST00000565564	AF096876.1-001	AF096876.1	1	0	1	1	3
hsa-miR-423-5p	MIMAT0004748	ENSG00000230487	ENST00000457484	PSMG3-AS1-003	PSMG3-AS1	1	0	1	1	3
hsa-miR-423-5p	MIMAT0004748	ENSG00000258088	ENST00000548702	RP11-114H23.2-001	RP11-114H23.2	1	0	1	1	3
hsa-miR-423-5p	MIMAT0004748	ENSG00000271871	ENST00000607378	AC005740.6-001	AC005740.6	1	0	1	1	3
hsa-miR-423-5p	MIMAT0004748	ENSG00000187621	ENST00000465501	TCL6-013	TCL6	1	0	1	1	3
hsa-miR-423-5p	MIMAT0004748	ENSG00000255693	ENST00000535058	RP11-766N7.3-001	RP11-766N7.3	1	0	1	1	3
hsa-miR-423-5p	MIMAT0004748	ENSG00000279935	ENST00000625008	RP11-447M12.3-001	RP11-447M12.3	1	0	1	1	3
hsa-miR-423-5p	MIMAT0004748	ENSG00000177788	ENST00000429227	RP5-1061H20.4-001	RP5-1061H20.4	1	0	1	1	3
hsa-miR-423-5p	MIMAT0004748	ENSG00000272841	ENST00000608721	RP3-428L16.2-001	RP3-428L16.2	1	0	1	1	3
hsa-miR-423-5p	MIMAT0004748	ENSG00000223831	ENST00000432130	RP1-56J10.8-001	RP1-56J10.8	1	0	1	1	3
hsa-miR-423-5p	MIMAT0004748	ENSG00000237187	ENST00000504474	NR2F1-AS1-004	NR2F1-AS1	1	0	1	1	3
hsa-miR-423-5p	MIMAT0004748	ENSG00000280953	ENST00000630252	LINC01163-001	LINC01163	1	0	1	1	3
hsa-miR-423-5p	MIMAT0004748	ENSG00000227733	ENST00000599640	RP4-565E6.1-006	RP4-565E6.1	1	0	1	1	3
hsa-miR-423-5p	MIMAT0004748	ENSG00000231933	ENST00000595093	CTA-125H2.2-005	CTA-125H2.2	1	0	1	1	3
hsa-miR-423-5p	MIMAT0004748	ENSG00000259488	ENST00000560323	RP11-154J22.1-002	RP11-154J22.1	1	0	1	1	3
hsa-miR-423-5p	MIMAT0004748	ENSG00000218109	ENST00000525678	KIRREL3-AS3-001	KIRREL3-AS3	1	0	1	1	3
hsa-miR-423-5p	MIMAT0004748	ENSG00000232712	ENST00000616177	KIZ-AS1-002	KIZ-AS1	1	0	1	1	3
hsa-miR-423-5p	MIMAT0004748	ENSG00000276807	ENST00000620960	RP11-8P11.4-001	RP11-8P11.4	1	0	1	1	3
hsa-miR-423-5p	MIMAT0004748	ENSG00000130600	ENST00000446406	H19-006	H19	1	0	1	1	3
hsa-miR-423-5p	MIMAT0004748	ENSG00000246526	ENST00000499502	RP11-539L10.2-001	RP11-539L10.2	1	0	1	1	3
hsa-miR-423-5p	MIMAT0004748	ENSG00000229196	ENST00000470348	RP11-775D22.2-001	RP11-775D22.2	1	0	1	1	3
hsa-miR-423-5p	MIMAT0004748	ENSG00000224888	ENST00000567968	RP5-1142A6.2-003	RP5-1142A6.2	1	0	1	1	3
hsa-miR-423-5p	MIMAT0004748	ENSG00000261634	ENST00000563004	RP11-352D13.6-005	RP11-352D13.6	1	0	1	1	3
hsa-miR-423-5p	MIMAT0004748	ENSG00000244578	ENST00000495287	LINC01391-001	LINC01391	1	0	1	1	3
hsa-miR-423-5p	MIMAT0004748	ENSG00000226688	ENST00000414006	ENTPD1-AS1-006	ENTPD1-AS1	1	0	1	1	3
hsa-miR-423-5p	MIMAT0004748	ENSG00000253187	ENST00000519694	HOXA10-AS-002	HOXA10-AS	1	0	1	1	3
hsa-miR-423-5p	MIMAT0004748	ENSG00000223381	ENST00000421481	RP11-655H13.2-001	RP11-655H13.2	1	0	1	1	3
hsa-miR-423-5p	MIMAT0004748	ENSG00000232909	ENST00000452048	RP3-510O8.4-001	RP3-510O8.4	1	0	1	1	3
hsa-miR-423-5p	MIMAT0004748	ENSG00000260387	ENST00000566485	RP11-463O9.6-001	RP11-463O9.6	1	0	1	1	3
hsa-miR-423-5p	MIMAT0004748	ENSG00000234912	ENST00000568363	SNHG20-003	SNHG20	1	0	1	1	3
hsa-miR-423-5p	MIMAT0004748	ENSG00000280257	ENST00000623818	RP11-340F16.2-001	RP11-340F16.2	1	0	1	1	3
hsa-miR-423-5p	MIMAT0004748	ENSG00000203987	ENST00000371390	RP11-188C12.3-001	RP11-188C12.3	1	0	1	1	3
hsa-miR-423-5p	MIMAT0004748	ENSG00000227218	ENST00000591408	RP11-203J24.8-008	RP11-203J24.8	1	0	1	1	3
hsa-miR-423-5p	MIMAT0004748	ENSG00000259209	ENST00000624370	RP5-991G20.2-004	RP5-991G20.2	1	0	1	1	3
hsa-miR-423-5p	MIMAT0004748	ENSG00000226172	ENST00000439394	RP4-712E4.1-001	RP4-712E4.1	1	0	1	1	3
hsa-miR-423-5p	MIMAT0004748	ENSG00000228172	ENST00000453649	RP1-317E23.3-002	RP1-317E23.3	1	0	1	1	3
hsa-miR-423-5p	MIMAT0004748	ENSG00000254635	ENST00000527986	WAC-AS1-001	WAC-AS1	1	0	1	1	3
hsa-miR-423-5p	MIMAT0004748	ENSG00000261801	ENST00000564194	LOXL1-AS1-002	LOXL1-AS1	1	0	1	1	3
hsa-miR-423-5p	MIMAT0004748	ENSG00000263843	ENST00000585075	RP11-649A18.12-002	RP11-649A18.12	1	0	1	1	3
hsa-miR-423-5p	MIMAT0004748	ENSG00000280424	ENST00000624893	CITF22-92A6.2-001	CITF22-92A6.2	1	0	1	1	3
hsa-miR-423-5p	MIMAT0004748	ENSG00000227508	ENST00000607074	FLJ38122-003	FLJ38122	1	0	1	1	3
hsa-miR-423-5p	MIMAT0004748	ENSG00000248015	ENST00000501448	AC005329.7-003	AC005329.7	1	0	1	1	3
hsa-miR-423-5p	MIMAT0004748	ENSG00000259353	ENST00000558042	RP11-30K9.5-001	RP11-30K9.5	1	0	1	1	3
hsa-miR-423-5p	MIMAT0004748	ENSG00000225493	ENST00000446979	LINC01107-001	LINC01107	1	0	1	1	3
hsa-miR-423-5p	MIMAT0004748	ENSG00000266490	ENST00000580085	CTD-2349P21.9-001	CTD-2349P21.9	1	0	1	1	3
hsa-miR-423-5p	MIMAT0004748	ENSG00000254876	ENST00000375204	RP11-23J9.5-001	RP11-23J9.5	1	0	1	1	3
hsa-miR-423-5p	MIMAT0004748	ENSG00000215196	ENST00000399760	AC091878.1-001	AC091878.1	1	0	1	1	3
hsa-miR-423-5p	MIMAT0004748	ENSG00000240012	ENST00000479030	SLC9A9-AS1-001	SLC9A9-AS1	1	0	1	1	3
hsa-miR-423-5p	MIMAT0004748	ENSG00000178248	ENST00000320372	AP000345.1-001	AP000345.1	1	0	1	1	3
hsa-miR-423-5p	MIMAT0004748	ENSG00000258869	ENST00000555187	RP11-204N11.1-001	RP11-204N11.1	1	0	1	1	3
hsa-miR-423-5p	MIMAT0004748	ENSG00000223839	ENST00000593047	FAM95B1-012	FAM95B1	1	0	1	1	3
hsa-miR-423-5p	MIMAT0004748	ENSG00000266950	ENST00000590046	CTD-2623N2.5-001	CTD-2623N2.5	1	0	1	1	3
hsa-miR-423-5p	MIMAT0004748	ENSG00000219159	ENST00000407635	AC011298.2-001	AC011298.2	1	0	1	1	3
hsa-miR-423-5p	MIMAT0004748	ENSG00000132204	ENST00000584090	LINC00470-002	LINC00470	1	0	1	1	3
hsa-miR-423-5p	MIMAT0004748	ENSG00000280124	ENST00000623636	RP11-739P6.1-001	RP11-739P6.1	1	0	1	1	3
hsa-miR-423-5p	MIMAT0004748	ENSG00000268812	ENST00000608354	RP1-102K2.8-001	RP1-102K2.8	1	0	1	1	3
hsa-miR-423-5p	MIMAT0004748	ENSG00000224914	ENST00000439559	LINC00863-001	LINC00863	1	0	1	1	3
hsa-miR-423-5p	MIMAT0004748	ENSG00000257563	ENST00000549796	MIR3180-3-001	MIR3180-3	1	0	1	1	3
hsa-miR-423-5p	MIMAT0004748	ENSG00000236188	ENST00000414074	PRKX-AS1-001	PRKX-AS1	1	0	1	1	3
hsa-miR-423-5p	MIMAT0004748	ENSG00000267075	ENST00000591705	RP11-434D2.3-001	RP11-434D2.3	1	0	1	1	3
hsa-miR-423-5p	MIMAT0004748	ENSG00000236939	ENST00000521246	BAALC-AS2-002	BAALC-AS2	1	0	1	1	3
hsa-miR-423-5p	MIMAT0004748	ENSG00000280279	ENST00000623180	RP11-1228E12.1-001	RP11-1228E12.1	1	0	1	1	3
hsa-miR-423-5p	MIMAT0004748	ENSG00000279141	ENST00000628780	LINC01451-001	LINC01451	1	0	1	1	3
hsa-miR-423-5p	MIMAT0004748	ENSG00000214548	ENST00000451743	MEG3-006	MEG3	1	0	1	1	3
hsa-miR-423-5p	MIMAT0004748	ENSG00000226812	ENST00000430481	RP5-881L22.5-002	RP5-881L22.5	1	0	1	1	3
hsa-miR-423-5p	MIMAT0004748	ENSG00000272686	ENST00000607957	RP11-390E23.6-001	RP11-390E23.6	1	0	1	1	3
hsa-miR-423-5p	MIMAT0004748	ENSG00000280449	ENST00000623704	CTD-2199O4.4-001	CTD-2199O4.4	1	0	1	1	3
hsa-miR-423-5p	MIMAT0004748	ENSG00000227533	ENST00000416689	SLC2A1-AS1-001	SLC2A1-AS1	1	0	1	1	3
hsa-miR-423-5p	MIMAT0004748	ENSG00000229776	ENST00000415626	C4B-AS1-001	C4B-AS1	1	0	1	1	3
hsa-miR-423-5p	MIMAT0004748	ENSG00000250685	ENST00000565643	RP11-486L19.2-001	RP11-486L19.2	1	0	1	1	3
hsa-miR-423-5p	MIMAT0004748	ENSG00000231890	ENST00000613688	DARS-AS1-025	DARS-AS1	1	0	1	1	3
hsa-miR-423-5p	MIMAT0004748	ENSG00000249091	ENST00000507220	RP11-733C7.1-001	RP11-733C7.1	1	0	1	1	3
hsa-miR-423-5p	MIMAT0004748	ENSG00000226440	ENST00000433684	RP11-506B6.6-001	RP11-506B6.6	1	0	1	1	3
hsa-miR-423-5p	MIMAT0004748	ENSG00000234773	ENST00000426044	CTD-2666L21.1-001	CTD-2666L21.1	1	0	1	1	3
hsa-miR-423-5p	MIMAT0004748	ENSG00000276255	ENST00000611237	RP5-881P19.7-201	RP5-881P19.7	1	0	1	1	3
hsa-miR-423-5p	MIMAT0004748	ENSG00000188660	ENST00000342757	LINC00319-002	LINC00319	1	0	1	1	3
hsa-miR-423-5p	MIMAT0004748	ENSG00000279987	ENST00000623570	AC008103.4-001	AC008103.4	1	0	1	1	3
hsa-miR-423-5p	MIMAT0004748	ENSG00000179028	ENST00000375625	RP11-363G10.2-001	RP11-363G10.2	1	0	1	1	3
hsa-miR-423-5p	MIMAT0004748	ENSG00000237232	ENST00000412906	ZNF295-AS1-001	ZNF295-AS1	1	0	1	1	3
hsa-miR-423-5p	MIMAT0004748	ENSG00000260792	ENST00000564585	RP11-982M15.8-001	RP11-982M15.8	1	0	1	1	3
hsa-miR-423-5p	MIMAT0004748	ENSG00000257327	ENST00000551650	RP11-650K20.3-001	RP11-650K20.3	1	0	1	1	3
hsa-miR-423-5p	MIMAT0004748	ENSG00000205866	ENST00000538190	FAM99A-002	FAM99A	1	0	1	1	3
hsa-miR-423-5p	MIMAT0004748	ENSG00000224717	ENST00000442318	RP11-576D8.4-001	RP11-576D8.4	1	0	1	1	3
hsa-miR-423-5p	MIMAT0004748	ENSG00000219665	ENST00000588047	CTD-2006C1.2-009	CTD-2006C1.2	1	0	1	1	3
hsa-miR-423-5p	MIMAT0004748	ENSG00000260249	ENST00000570167	RP11-401P9.5-001	RP11-401P9.5	1	0	1	1	3
hsa-miR-423-5p	MIMAT0004748	ENSG00000225129	ENST00000424662	RP4-614C15.2-001	RP4-614C15.2	1	0	1	1	3
hsa-miR-423-5p	MIMAT0004748	ENSG00000250173	ENST00000511936	RP11-661C8.3-001	RP11-661C8.3	1	0	1	1	3
hsa-miR-423-5p	MIMAT0004748	ENSG00000268895	ENST00000593374	A1BG-AS1-003	A1BG-AS1	1	0	1	1	3
hsa-miR-423-5p	MIMAT0004748	ENSG00000203506	ENST00000601343	RBMS3-AS2-002	RBMS3-AS2	1	0	1	1	3
hsa-miR-423-5p	MIMAT0004748	ENSG00000237352	ENST00000449812	RP11-145M4.3-001	RP11-145M4.3	1	0	1	1	3
hsa-miR-423-5p	MIMAT0004748	ENSG00000224945	ENST00000456944	RP11-82L18.2-002	RP11-82L18.2	1	0	1	1	3
hsa-miR-423-5p	MIMAT0004748	ENSG00000274964	ENST00000622688	RP11-817I4.1-001	RP11-817I4.1	1	0	1	1	3
hsa-miR-423-5p	MIMAT0004748	ENSG00000279659	ENST00000623514	RP11-177G23.1-001	RP11-177G23.1	1	0	1	1	3
hsa-miR-423-5p	MIMAT0004748	ENSG00000244879	ENST00000499624	GABPB1-AS1-001	GABPB1-AS1	1	0	1	1	3
hsa-miR-423-5p	MIMAT0004748	ENSG00000253230	ENST00000519461	LINC00599-001	LINC00599	1	0	1	1	3
hsa-miR-423-5p	MIMAT0004748	ENSG00000260439	ENST00000569574	LMF1-AS1-001	LMF1-AS1	1	0	1	1	3
hsa-miR-423-5p	MIMAT0004748	ENSG00000224294	ENST00000440955	RP3-326I13.1-001	RP3-326I13.1	1	0	1	1	3
hsa-miR-423-5p	MIMAT0004748	ENSG00000214548	ENST00000555928	MEG3-027	MEG3	1	0	1	1	3
hsa-miR-423-5p	MIMAT0004748	ENSG00000234640	ENST00000454492	RP11-264E18.1-001	RP11-264E18.1	1	0	1	1	3
hsa-miR-423-5p	MIMAT0004748	ENSG00000279821	ENST00000623593	RP11-1334A24.5-001	RP11-1334A24.5	1	0	1	1	3
hsa-miR-423-5p	MIMAT0004748	ENSG00000231187	ENST00000430188	RP11-38L15.3-001	RP11-38L15.3	1	0	1	1	3
hsa-miR-423-5p	MIMAT0004748	ENSG00000280587	ENST00000628622	LINC01348-001	LINC01348	1	0	1	1	3
hsa-miR-423-5p	MIMAT0004748	ENSG00000254135	ENST00000519609	RP11-32D16.1-001	RP11-32D16.1	1	0	1	1	3
hsa-miR-423-5p	MIMAT0004748	ENSG00000250714	ENST00000511929	RP11-1149O23.4-001	RP11-1149O23.4	1	0	1	1	3
hsa-miR-423-5p	MIMAT0004748	ENSG00000257038	ENST00000546324	RP11-800A3.7-001	RP11-800A3.7	1	0	1	1	3
hsa-miR-423-5p	MIMAT0004748	ENSG00000269926	ENST00000491934	RP11-442H21.2-001	RP11-442H21.2	1	0	1	1	3
hsa-miR-423-5p	MIMAT0004748	ENSG00000231898	ENST00000594762	AC012594.1-011	AC012594.1	1	0	1	1	3
hsa-miR-423-5p	MIMAT0004748	ENSG00000276397	ENST00000611889	AC034110.1-001	AC034110.1	1	0	1	1	3
hsa-miR-423-5p	MIMAT0004748	ENSG00000231421	ENST00000582291	AC006050.2-003	AC006050.2	1	0	1	1	3
hsa-miR-423-5p	MIMAT0004748	ENSG00000246100	ENST00000537070	LINC00900-005	LINC00900	1	0	1	1	3
hsa-miR-423-5p	MIMAT0004748	ENSG00000253557	ENST00000517949	RP11-1080G15.1-001	RP11-1080G15.1	1	0	1	1	3
hsa-miR-423-5p	MIMAT0004748	ENSG00000281264	ENST00000630100	SALRNA3-001	SALRNA3	1	0	1	1	3
hsa-miR-423-5p	MIMAT0004748	ENSG00000248367	ENST00000504573	CTB-129O4.1-001	CTB-129O4.1	1	0	1	1	3
hsa-miR-423-5p	MIMAT0004748	ENSG00000274372	ENST00000617309	RP11-94I2.4-002	RP11-94I2.4	1	0	1	1	3
hsa-miR-423-5p	MIMAT0004748	ENSG00000152931	ENST00000504876	PART1-003	PART1	1	0	1	1	3
hsa-miR-423-5p	MIMAT0004748	ENSG00000246863	ENST00000558675	RP11-325N19.3-002	RP11-325N19.3	1	0	1	1	3
hsa-miR-423-5p	MIMAT0004748	ENSG00000253734	ENST00000519550	LINC01289-001	LINC01289	1	0	1	1	3
hsa-miR-423-5p	MIMAT0004748	ENSG00000259723	ENST00000558738	RP5-823G15.5-001	RP5-823G15.5	1	0	1	1	3
hsa-miR-423-5p	MIMAT0004748	ENSG00000267106	ENST00000591932	ZNF561-AS1-007	ZNF561-AS1	1	0	1	1	3
hsa-miR-423-5p	MIMAT0004748	ENSG00000238122	ENST00000438965	RP11-483I13.2-001	RP11-483I13.2	1	0	1	1	3
hsa-miR-423-5p	MIMAT0004748	ENSG00000249635	ENST00000513220	RP11-710F7.3-001	RP11-710F7.3	1	0	1	1	3
hsa-miR-423-5p	MIMAT0004748	ENSG00000280327	ENST00000623878	LA16c-313F4.1-001	LA16c-313F4.1	1	0	1	1	3
hsa-miR-423-5p	MIMAT0004748	ENSG00000224349	ENST00000448363	RP11-462G2.2-001	RP11-462G2.2	1	0	1	1	3
hsa-miR-423-5p	MIMAT0004748	ENSG00000279185	ENST00000624278	CTA-929C8.9-001	CTA-929C8.9	1	0	1	1	3
hsa-miR-423-5p	MIMAT0004748	ENSG00000235790	ENST00000607926	RP11-73M7.6-020	RP11-73M7.6	1	0	1	1	3
hsa-miR-423-5p	MIMAT0004748	ENSG00000253405	ENST00000519218	EVX1-AS-002	EVX1-AS	1	0	1	1	3
hsa-miR-423-5p	MIMAT0004748	ENSG00000186056	ENST00000454613	MATN1-AS1-001	MATN1-AS1	1	0	1	1	3
hsa-miR-423-5p	MIMAT0004748	ENSG00000264112	ENST00000582096	RP11-159D12.2-003	RP11-159D12.2	1	0	1	1	3
hsa-miR-423-5p	MIMAT0004748	ENSG00000254154	ENST00000466953	RP4-798P15.3-002	RP4-798P15.3	1	0	1	1	3
hsa-miR-423-5p	MIMAT0004748	ENSG00000229848	ENST00000442532	RP13-766D20.2-001	RP13-766D20.2	1	0	1	1	3
hsa-miR-423-5p	MIMAT0004748	ENSG00000241769	ENST00000609651	LINC00893-012	LINC00893	1	0	1	1	3
hsa-miR-423-5p	MIMAT0004748	ENSG00000257069	ENST00000539086	RP11-783K16.10-001	RP11-783K16.10	1	0	1	1	3
hsa-miR-423-5p	MIMAT0004748	ENSG00000099869	ENST00000381363	IGF2-AS-003	IGF2-AS	1	0	1	1	3
hsa-miR-423-5p	MIMAT0004748	ENSG00000264772	ENST00000628359	RP11-186B7.4-201	RP11-186B7.4	1	0	1	1	3
hsa-miR-423-5p	MIMAT0004748	ENSG00000225791	ENST00000606558	TRAM2-AS1-002	TRAM2-AS1	1	0	1	1	3
hsa-miR-423-5p	MIMAT0004748	ENSG00000272941	ENST00000608819	RP11-134L10.1-001	RP11-134L10.1	1	0	1	1	3
hsa-miR-423-5p	MIMAT0004748	ENSG00000236144	ENST00000590717	TMEM147-AS1-003	TMEM147-AS1	1	0	1	1	3
hsa-miR-423-5p	MIMAT0004748	ENSG00000274425	ENST00000612689	AC114271.2-001	AC114271.2	1	0	1	1	3
hsa-miR-423-5p	MIMAT0004748	ENSG00000249395	ENST00000521147	CASC9-002	CASC9	1	0	1	1	3
hsa-miR-423-5p	MIMAT0004748	ENSG00000263082	ENST00000576842	CTD-2034I21.2-001	CTD-2034I21.2	1	0	1	1	3
hsa-miR-423-5p	MIMAT0004748	ENSG00000227165	ENST00000630905	WDR11-AS1-008	WDR11-AS1	1	0	1	1	3
hsa-miR-423-5p	MIMAT0004748	ENSG00000224152	ENST00000418474	AC009506.1-001	AC009506.1	1	0	1	1	3
hsa-miR-423-5p	MIMAT0004748	ENSG00000254545	ENST00000527035	RP11-84A19.3-001	RP11-84A19.3	1	0	1	1	3
hsa-miR-423-5p	MIMAT0004748	ENSG00000261720	ENST00000564390	RP11-161M6.5-001	RP11-161M6.5	1	0	1	1	3
hsa-miR-423-5p	MIMAT0004748	ENSG00000232265	ENST00000595367	XXyac-YX155B6.5-004	XXyac-YX155B6.5	1	0	1	1	3
hsa-miR-423-5p	MIMAT0004748	ENSG00000279699	ENST00000623328	RP1-102K2.9-001	RP1-102K2.9	1	0	1	1	3
hsa-miR-423-5p	MIMAT0004748	ENSG00000226757	ENST00000424958	PP12613-001	PP12613	1	0	1	1	3
hsa-miR-423-5p	MIMAT0004748	ENSG00000174365	ENST00000434729	SNHG11-010	SNHG11	1	0	1	1	3
hsa-miR-423-5p	MIMAT0004748	ENSG00000204362	ENST00000412427	RP11-380J14.1-001	RP11-380J14.1	1	0	1	1	3
hsa-miR-423-5p	MIMAT0004748	ENSG00000261188	ENST00000566814	CTA-445C9.14-001	CTA-445C9.14	1	0	1	1	3
hsa-miR-423-5p	MIMAT0004748	ENSG00000254768	ENST00000530569	CTD-2140G10.2-002	CTD-2140G10.2	1	0	1	1	3
hsa-miR-423-5p	MIMAT0004748	ENSG00000228878	ENST00000412856	SEPT7-AS1-001	SEPT7-AS1	1	0	1	1	3
hsa-miR-423-5p	MIMAT0004748	ENSG00000255571	ENST00000536780	LINC00925-001	LINC00925	1	0	1	1	3
hsa-miR-423-5p	MIMAT0004748	ENSG00000226877	ENST00000458016	RP11-575L7.2-001	RP11-575L7.2	1	0	1	1	3
hsa-miR-423-5p	MIMAT0004748	ENSG00000272758	ENST00000608756	RP11-299J3.8-002	RP11-299J3.8	1	0	1	1	3
hsa-miR-423-5p	MIMAT0004748	ENSG00000278390	ENST00000620300	RP11-74J13.8-002	RP11-74J13.8	1	0	1	1	3
hsa-miR-423-5p	MIMAT0004748	ENSG00000250770	ENST00000505276	RP5-1063M23.1-001	RP5-1063M23.1	1	0	1	1	3
hsa-miR-423-5p	MIMAT0004748	ENSG00000269968	ENST00000602946	RP5-940J5.9-001	RP5-940J5.9	1	0	1	1	3
hsa-miR-423-5p	MIMAT0004748	ENSG00000279387	ENST00000623523	CTC-525D6.3-001	CTC-525D6.3	1	0	1	1	3
hsa-miR-423-5p	MIMAT0004748	ENSG00000251497	ENST00000506255	RP11-197N18.7-001	RP11-197N18.7	1	0	1	1	3
hsa-miR-423-5p	MIMAT0004748	ENSG00000236671	ENST00000420193	PRKG1-AS1-003	PRKG1-AS1	1	0	1	1	3
hsa-miR-423-5p	MIMAT0004748	ENSG00000276519	ENST00000614642	RP11-510J16.6-001	RP11-510J16.6	1	0	1	1	3
hsa-miR-423-5p	MIMAT0004748	ENSG00000280043	ENST00000623090	RP11-1281K21.8-001	RP11-1281K21.8	1	0	1	1	3
hsa-miR-423-5p	MIMAT0004748	ENSG00000223991	ENST00000425110	AC104809.2-001	AC104809.2	1	0	1	1	3
hsa-miR-423-5p	MIMAT0004748	ENSG00000268536	ENST00000598782	AC005523.3-001	AC005523.3	1	0	1	1	3
hsa-miR-423-5p	MIMAT0004748	ENSG00000227925	ENST00000431729	RP11-191N8.2-001	RP11-191N8.2	1	0	1	1	3
hsa-miR-423-5p	MIMAT0004748	ENSG00000206142	ENST00000431488	KB-1183D5.13-004	KB-1183D5.13	1	0	1	1	3
hsa-miR-423-5p	MIMAT0004748	ENSG00000228544	ENST00000414656	CCDC183-AS1-001	CCDC183-AS1	1	0	1	1	3
hsa-miR-423-5p	MIMAT0004748	ENSG00000260305	ENST00000569588	NTRK3-AS1-001	NTRK3-AS1	1	0	1	1	3
hsa-miR-423-5p	MIMAT0004748	ENSG00000263167	ENST00000570413	RP11-149I9.2-001	RP11-149I9.2	1	0	1	1	3
hsa-miR-423-5p	MIMAT0004748	ENSG00000222004	ENST00000614528	C7orf71-201	C7orf71	1	0	1	1	3
hsa-miR-423-5p	MIMAT0004748	ENSG00000247095	ENST00000533920	MIR210HG-003	MIR210HG	1	0	1	1	3
hsa-miR-423-5p	MIMAT0004748	ENSG00000267547	ENST00000592117	RP11-686D22.4-001	RP11-686D22.4	1	0	1	1	3
hsa-miR-423-5p	MIMAT0004748	ENSG00000277182	ENST00000610658	CTB-58E17.5-001	CTB-58E17.5	1	0	1	1	3
hsa-miR-423-5p	MIMAT0004748	ENSG00000197099	ENST00000626649	RP11-573D15.8-044	RP11-573D15.8	1	0	1	1	3
hsa-miR-423-5p	MIMAT0004748	ENSG00000261033	ENST00000564549	RP11-209D14.2-001	RP11-209D14.2	1	0	1	1	3
hsa-miR-423-5p	MIMAT0004748	ENSG00000273192	ENST00000610245	CITF22-1A6.3-001	CITF22-1A6.3	1	0	1	1	3
hsa-miR-423-5p	MIMAT0004748	ENSG00000279071	ENST00000625118	RP11-83B20.3-001	RP11-83B20.3	1	0	1	1	3
hsa-miR-423-5p	MIMAT0004748	ENSG00000267130	ENST00000593041	CTD-2540B15.9-001	CTD-2540B15.9	1	0	1	1	3
hsa-miR-423-5p	MIMAT0004748	ENSG00000249673	ENST00000512712	NOP14-AS1-002	NOP14-AS1	1	0	1	1	3
hsa-miR-423-5p	MIMAT0004748	ENSG00000245164	ENST00000518964	LINC00861-002	LINC00861	1	0	1	1	3
hsa-miR-423-5p	MIMAT0004748	ENSG00000182776	ENST00000375644	RP11-114H20.1-001	RP11-114H20.1	1	0	1	1	3
hsa-miR-423-5p	MIMAT0004748	ENSG00000280370	ENST00000624235	CTA-342B11.3-001	CTA-342B11.3	1	0	1	1	3
hsa-miR-423-5p	MIMAT0004748	ENSG00000204588	ENST00000419296	LINC01123-003	LINC01123	1	0	1	1	3
hsa-miR-423-5p	MIMAT0004748	ENSG00000251322	ENST00000262795	SHANK3-201	SHANK3	1	0	1	1	3
hsa-miR-423-5p	MIMAT0004748	ENSG00000248954	ENST00000515692	RP11-304F15.4-001	RP11-304F15.4	1	0	1	1	3
hsa-miR-423-5p	MIMAT0004748	ENSG00000254813	ENST00000534827	RP11-252C15.1-001	RP11-252C15.1	1	0	1	1	3
hsa-miR-423-5p	MIMAT0004748	ENSG00000239653	ENST00000472046	PSMD6-AS2-001	PSMD6-AS2	1	0	1	1	3
hsa-miR-423-5p	MIMAT0004748	ENSG00000225652	ENST00000418515	KCNMA1-AS3-001	KCNMA1-AS3	1	0	1	1	3
hsa-miR-423-5p	MIMAT0004748	ENSG00000259446	ENST00000561458	RP11-489D6.2-001	RP11-489D6.2	1	0	1	1	3
hsa-miR-423-5p	MIMAT0004748	ENSG00000274021	ENST00000611513	RP11-823E8.3-001	RP11-823E8.3	1	0	1	1	3
hsa-miR-423-5p	MIMAT0004748	ENSG00000243766	ENST00000614457	HOTTIP-006	HOTTIP	1	0	1	1	3
hsa-miR-423-5p	MIMAT0004748	ENSG00000276638	ENST00000615088	RP3-333B15.6-001	RP3-333B15.6	1	0	1	1	3
hsa-miR-423-5p	MIMAT0004748	ENSG00000125804	ENST00000389261	FAM182A-005	FAM182A	1	0	1	1	3
hsa-miR-423-5p	MIMAT0004748	ENSG00000240423	ENST00000494231	LINC00636-001	LINC00636	1	0	1	1	3
hsa-miR-423-5p	MIMAT0004748	ENSG00000250069	ENST00000508713	CTB-131B5.2-001	CTB-131B5.2	1	0	1	1	3
hsa-miR-423-5p	MIMAT0004748	ENSG00000280061	ENST00000623331	CTD-2001J20.1-001	CTD-2001J20.1	1	0	1	1	3
hsa-miR-423-5p	MIMAT0004748	ENSG00000227039	ENST00000441379	ITGB2-AS1-001	ITGB2-AS1	1	0	1	1	3
hsa-miR-423-5p	MIMAT0004748	ENSG00000246339	ENST00000501224	EXTL3-AS1-003	EXTL3-AS1	1	0	1	1	3
hsa-miR-423-5p	MIMAT0004748	ENSG00000196295	ENST00000355837	AC005154.6-001	AC005154.6	1	0	1	1	3
hsa-miR-423-5p	MIMAT0004748	ENSG00000229122	ENST00000411862	AGBL5-IT1-001	AGBL5-IT1	1	0	1	1	3
hsa-miR-423-5p	MIMAT0004748	ENSG00000235513	ENST00000441316	RP4-756G23.5-001	RP4-756G23.5	1	0	1	1	3
hsa-miR-423-5p	MIMAT0004748	ENSG00000227953	ENST00000426089	LINC01341-002	LINC01341	1	0	1	1	3
hsa-miR-423-5p	MIMAT0004748	ENSG00000258498	ENST00000557661	DIO3OS-008	DIO3OS	1	0	1	1	3
hsa-miR-423-5p	MIMAT0004748	ENSG00000280217	ENST00000623628	RP11-638F5.2-001	RP11-638F5.2	1	0	1	1	3
hsa-miR-423-5p	MIMAT0004748	ENSG00000267568	ENST00000564292	RP11-87G24.3-001	RP11-87G24.3	1	0	1	1	3
hsa-miR-423-5p	MIMAT0004748	ENSG00000231721	ENST00000443623	LINC-PINT-008	LINC-PINT	1	0	1	1	3
hsa-miR-423-5p	MIMAT0004748	ENSG00000232295	ENST00000587253	RP11-154D6.1-013	RP11-154D6.1	1	0	1	1	3
hsa-miR-423-5p	MIMAT0004748	ENSG00000267150	ENST00000591211	RP11-411B10.2-001	RP11-411B10.2	1	0	1	1	3
hsa-miR-423-5p	MIMAT0004748	ENSG00000253320	ENST00000518978	KB-1507C5.2-012	KB-1507C5.2	1	0	1	1	3
hsa-miR-423-5p	MIMAT0004748	ENSG00000228784	ENST00000433669	LINC00954-002	LINC00954	1	0	1	1	3
hsa-miR-423-5p	MIMAT0004748	ENSG00000260542	ENST00000569373	RP13-379O24.2-001	RP13-379O24.2	1	0	1	1	3
hsa-miR-423-5p	MIMAT0004748	ENSG00000277870	ENST00000615181	FAM230A-201	FAM230A	1	0	1	1	3
hsa-miR-423-5p	MIMAT0004748	ENSG00000250590	ENST00000507817	RP11-565A3.2-001	RP11-565A3.2	1	0	1	1	3
hsa-miR-423-5p	MIMAT0004748	ENSG00000261222	ENST00000569279	CTD-2006K23.1-001	CTD-2006K23.1	1	0	1	1	3
hsa-miR-423-5p	MIMAT0004748	ENSG00000237596	ENST00000419926	RP13-143G15.4-007	RP13-143G15.4	1	0	1	1	3
hsa-miR-423-5p	MIMAT0004748	ENSG00000267278	ENST00000588160	MAP3K14-AS1-007	MAP3K14-AS1	1	0	1	1	3
hsa-miR-423-5p	MIMAT0004748	ENSG00000253479	ENST00000517343	RP11-744J10.3-001	RP11-744J10.3	1	0	1	1	3
hsa-miR-423-5p	MIMAT0004748	ENSG00000229951	ENST00000427929	FLJ31356-001	FLJ31356	1	0	1	1	3
hsa-miR-423-5p	MIMAT0004748	ENSG00000205622	ENST00000440379	AF064858.6-003	AF064858.6	1	0	1	1	3
hsa-miR-423-5p	MIMAT0004748	ENSG00000227706	ENST00000412872	RP11-301G19.1-001	RP11-301G19.1	1	0	1	1	3
hsa-miR-423-5p	MIMAT0004748	ENSG00000270020	ENST00000602739	RP11-463O9.9-001	RP11-463O9.9	1	0	1	1	3
hsa-miR-423-5p	MIMAT0004748	ENSG00000251562	ENST00000617489	MALAT1-003	MALAT1	1	0	1	1	3
hsa-miR-423-5p	MIMAT0004748	ENSG00000179818	ENST00000596665	PCBP1-AS1-050	PCBP1-AS1	1	0	1	1	3
hsa-miR-423-5p	MIMAT0004748	ENSG00000228470	ENST00000443622	RP11-176D17.3-001	RP11-176D17.3	1	0	1	1	3
hsa-miR-423-5p	MIMAT0004748	ENSG00000267421	ENST00000593218	AC005498.3-004	AC005498.3	1	0	1	1	3
hsa-miR-423-5p	MIMAT0004748	ENSG00000227061	ENST00000437798	AC079779.7-001	AC079779.7	1	0	1	1	3
hsa-miR-423-5p	MIMAT0004748	ENSG00000253653	ENST00000517634	CTC-248O19.1-001	CTC-248O19.1	1	0	1	1	3
hsa-miR-423-5p	MIMAT0004748	ENSG00000268649	ENST00000596276	RP4-806M20.4-001	RP4-806M20.4	1	0	1	1	3
hsa-miR-423-5p	MIMAT0004748	ENSG00000235529	ENST00000440498	AGAP1-IT1-001	AGAP1-IT1	1	0	1	1	3
hsa-miR-423-5p	MIMAT0004748	ENSG00000267048	ENST00000570217	RP11-566K11.7-001	RP11-566K11.7	1	0	1	1	3
hsa-miR-423-5p	MIMAT0004748	ENSG00000263312	ENST00000571890	RP11-459C13.1-001	RP11-459C13.1	1	0	1	1	3
hsa-miR-423-5p	MIMAT0004748	ENSG00000236886	ENST00000447289	AC007563.5-001	AC007563.5	1	0	1	1	3
hsa-miR-423-5p	MIMAT0004748	ENSG00000225269	ENST00000417883	LINC00705-001	LINC00705	1	0	1	1	3
hsa-miR-423-5p	MIMAT0004748	ENSG00000226791	ENST00000624259	AC109826.1-003	AC109826.1	1	0	1	1	3
hsa-miR-423-5p	MIMAT0004748	ENSG00000236372	ENST00000441459	RP5-865N13.1-001	RP5-865N13.1	1	0	1	1	3
hsa-miR-423-5p	MIMAT0004748	ENSG00000245466	ENST00000500016	CTD-2540L5.6-001	CTD-2540L5.6	1	0	1	1	3
hsa-miR-423-5p	MIMAT0004748	ENSG00000255441	ENST00000526996	CTD-2616J11.2-002	CTD-2616J11.2	1	0	1	1	3
hsa-miR-423-5p	MIMAT0004748	ENSG00000260565	ENST00000568395	CTD-2270P14.1-001	CTD-2270P14.1	1	0	1	1	3
hsa-miR-423-5p	MIMAT0004748	ENSG00000267750	ENST00000586388	RUNDC3A-AS1-002	RUNDC3A-AS1	1	0	1	1	3
hsa-miR-423-5p	MIMAT0004748	ENSG00000261241	ENST00000570245	RP11-883G14.1-001	RP11-883G14.1	1	0	1	1	3
hsa-miR-423-5p	MIMAT0004748	ENSG00000230487	ENST00000524978	PSMG3-AS1-007	PSMG3-AS1	1	0	1	1	3
hsa-miR-423-5p	MIMAT0004748	ENSG00000255693	ENST00000540024	RP11-766N7.3-002	RP11-766N7.3	1	0	1	1	3
hsa-miR-423-5p	MIMAT0004748	ENSG00000226969	ENST00000445600	RP11-547D24.3-001	RP11-547D24.3	1	0	1	1	3
hsa-miR-423-5p	MIMAT0004748	ENSG00000233183	ENST00000451317	RP3-468B3.2-001	RP3-468B3.2	1	0	1	1	3
hsa-miR-423-5p	MIMAT0004748	ENSG00000237187	ENST00000507963	NR2F1-AS1-003	NR2F1-AS1	1	0	1	1	3
hsa-miR-423-5p	MIMAT0004748	ENSG00000248307	ENST00000512536	LINC00616-003	LINC00616	1	0	1	1	3
hsa-miR-423-5p	MIMAT0004748	ENSG00000268186	ENST00000600941	CTC-241F20.4-001	CTC-241F20.4	1	0	1	1	3
hsa-miR-423-5p	MIMAT0004748	ENSG00000280958	ENST00000627671	RP4-587D13.2-001	RP4-587D13.2	1	0	1	1	3
hsa-miR-423-5p	MIMAT0004748	ENSG00000227733	ENST00000611286	RP4-565E6.1-001	RP4-565E6.1	1	0	1	1	3
hsa-miR-423-5p	MIMAT0004748	ENSG00000259488	ENST00000612262	RP11-154J22.1-003	RP11-154J22.1	1	0	1	1	3
hsa-miR-423-5p	MIMAT0004748	ENSG00000230676	ENST00000436510	RP11-65J3.3-002	RP11-65J3.3	1	0	1	1	3
hsa-miR-423-5p	MIMAT0004748	ENSG00000249307	ENST00000437737	LINC01088-010	LINC01088	1	0	1	1	3
hsa-miR-423-5p	MIMAT0004748	ENSG00000255087	ENST00000527317	RP11-168K9.2-001	RP11-168K9.2	1	0	1	1	3
hsa-miR-423-5p	MIMAT0004748	ENSG00000260198	ENST00000564074	RP11-441F2.2-001	RP11-441F2.2	1	0	1	1	3
hsa-miR-423-5p	MIMAT0004748	ENSG00000272145	ENST00000606277	NFYC-AS1-001	NFYC-AS1	1	0	1	1	3
hsa-miR-423-5p	MIMAT0004748	ENSG00000196366	ENST00000354376	C9orf163-201	C9orf163	1	0	1	1	3
hsa-miR-423-5p	MIMAT0004748	ENSG00000281796	ENST00000629335	EHMT1-IT1-001	EHMT1-IT1	1	0	1	1	3
hsa-miR-423-5p	MIMAT0004748	ENSG00000228021	ENST00000415305	RP11-383C5.3-001	RP11-383C5.3	1	0	1	1	3
hsa-miR-423-5p	MIMAT0004748	ENSG00000278977	ENST00000624452	RP1-41C23.2-001	RP1-41C23.2	1	0	1	1	3
hsa-miR-423-5p	MIMAT0004748	ENSG00000257527	ENST00000552753	MIR3179-3-001	MIR3179-3	1	0	1	1	3
hsa-miR-423-5p	MIMAT0004748	ENSG00000261634	ENST00000565312	RP11-352D13.6-002	RP11-352D13.6	1	0	1	1	3
hsa-miR-423-5p	MIMAT0004748	ENSG00000279619	ENST00000624372	CTD-2527I21.5-001	CTD-2527I21.5	1	0	1	1	3
hsa-miR-423-5p	MIMAT0004748	ENSG00000226688	ENST00000416301	ENTPD1-AS1-004	ENTPD1-AS1	1	0	1	1	3
hsa-miR-423-5p	MIMAT0004748	ENSG00000230937	ENST00000444286	MIR205HG-005	MIR205HG	1	0	1	1	3
hsa-miR-423-5p	MIMAT0004748	ENSG00000260388	ENST00000566385	LINC00562-001	LINC00562	1	0	1	1	3
hsa-miR-423-5p	MIMAT0004748	ENSG00000224238	ENST00000423984	WARS2-IT1-001	WARS2-IT1	1	0	1	1	3
hsa-miR-423-5p	MIMAT0004748	ENSG00000228172	ENST00000536896	RP1-317E23.3-003	RP1-317E23.3	1	0	1	1	3
hsa-miR-423-5p	MIMAT0004748	ENSG00000271409	ENST00000603033	RP11-432J9.3-001	RP11-432J9.3	1	0	1	1	3
hsa-miR-423-5p	MIMAT0004748	ENSG00000184441	ENST00000448927	AP001062.7-001	AP001062.7	1	0	1	1	3
hsa-miR-423-5p	MIMAT0004748	ENSG00000233029	ENST00000457996	RP11-439A17.9-001	RP11-439A17.9	1	0	1	1	3
hsa-miR-423-5p	MIMAT0004748	ENSG00000267767	ENST00000587150	CTC-523E23.4-002	CTC-523E23.4	1	0	1	1	3
hsa-miR-423-5p	MIMAT0004748	ENSG00000231154	ENST00000435306	MORF4L2-AS1-001	MORF4L2-AS1	1	0	1	1	3
hsa-miR-423-5p	MIMAT0004748	ENSG00000280425	ENST00000623663	RP11-446E24.3-001	RP11-446E24.3	1	0	1	1	3
hsa-miR-423-5p	MIMAT0004748	ENSG00000229743	ENST00000433433	LINC01159-001	LINC01159	1	0	1	1	3
hsa-miR-423-5p	MIMAT0004748	ENSG00000233862	ENST00000453606	AC016907.3-001	AC016907.3	1	0	1	1	3
hsa-miR-423-5p	MIMAT0004748	ENSG00000256967	ENST00000544657	RP11-273B20.1-002	RP11-273B20.1	1	0	1	1	3
hsa-miR-423-5p	MIMAT0004748	ENSG00000231890	ENST00000594219	DARS-AS1-016	DARS-AS1	1	0	1	1	3
hsa-miR-423-5p	MIMAT0004748	ENSG00000188280	ENST00000583722	FAM230A-201	FAM230A	1	0	1	1	3
hsa-miR-423-5p	MIMAT0004748	ENSG00000258869	ENST00000557296	RP11-204N11.1-002	RP11-204N11.1	1	0	1	1	3
hsa-miR-423-5p	MIMAT0004748	ENSG00000260774	ENST00000565521	CTD-2083E4.4-001	CTD-2083E4.4	1	0	1	1	3
hsa-miR-423-5p	MIMAT0004748	ENSG00000225746	ENST00000414488	SNHG23-008	SNHG23	1	0	1	1	3
hsa-miR-423-5p	MIMAT0004748	ENSG00000257279	ENST00000548738	RP11-231I16.1-001	RP11-231I16.1	1	0	1	1	3
hsa-miR-423-5p	MIMAT0004748	ENSG00000266951	ENST00000589196	AD000091.2-001	AD000091.2	1	0	1	1	3
hsa-miR-423-5p	MIMAT0004748	ENSG00000226674	ENST00000431734	TEX41-005	TEX41	1	0	1	1	3
hsa-miR-423-5p	MIMAT0004748	ENSG00000249326	ENST00000514569	CTD-2194D22.4-001	CTD-2194D22.4	1	0	1	1	3
hsa-miR-423-5p	MIMAT0004748	ENSG00000260228	ENST00000561599	RP11-483P21.2-002	RP11-483P21.2	1	0	1	1	3
hsa-miR-423-5p	MIMAT0004748	ENSG00000230709	ENST00000428142	AC104024.1-001	AC104024.1	1	0	1	1	3
hsa-miR-423-5p	MIMAT0004748	ENSG00000280125	ENST00000624630	RP4-800O15.1-001	RP4-800O15.1	1	0	1	1	3
hsa-miR-423-5p	MIMAT0004748	ENSG00000256092	ENST00000543072	RP13-942N8.1-001	RP13-942N8.1	1	0	1	1	3
hsa-miR-423-5p	MIMAT0004748	ENSG00000260942	ENST00000567819	CAPN10-AS1-001	CAPN10-AS1	1	0	1	1	3
hsa-miR-423-5p	MIMAT0004748	ENSG00000203392	ENST00000435356	CTD-2026K11.6-001	CTD-2026K11.6	1	0	1	1	3
hsa-miR-423-5p	MIMAT0004748	ENSG00000231609	ENST00000429952	AC009501.4-001	AC009501.4	1	0	1	1	3
hsa-miR-423-5p	MIMAT0004748	ENSG00000261646	ENST00000563631	RP11-489G11.3-001	RP11-489G11.3	1	0	1	1	3
hsa-miR-423-5p	MIMAT0004748	ENSG00000279637	ENST00000624177	RP11-196B3.1-001	RP11-196B3.1	1	0	1	1	3
hsa-miR-423-5p	MIMAT0004748	ENSG00000226696	ENST00000429922	LENG8-AS1-001	LENG8-AS1	1	0	1	1	3
hsa-miR-423-5p	MIMAT0004748	ENSG00000253205	ENST00000522086	CTD-3046C4.1-004	CTD-3046C4.1	1	0	1	1	3
hsa-miR-423-5p	MIMAT0004748	ENSG00000258561	ENST00000556361	RP11-72M17.1-002	RP11-72M17.1	1	0	1	1	3
hsa-miR-423-5p	MIMAT0004748	ENSG00000236947	ENST00000441085	RP11-98G7.1-001	RP11-98G7.1	1	0	1	1	3
hsa-miR-423-5p	MIMAT0004748	ENSG00000260409	ENST00000564214	RP11-403B2.7-001	RP11-403B2.7	1	0	1	1	3
hsa-miR-423-5p	MIMAT0004748	ENSG00000229498	ENST00000366278	AC105053.3-001	AC105053.3	1	0	1	1	3
hsa-miR-423-5p	MIMAT0004748	ENSG00000234944	ENST00000421320	RP11-124O11.1-001	RP11-124O11.1	1	0	1	1	3
hsa-miR-423-5p	MIMAT0004748	ENSG00000250390	ENST00000511947	RP11-338H14.1-001	RP11-338H14.1	1	0	1	1	3
hsa-miR-423-5p	MIMAT0004748	ENSG00000279142	ENST00000623284	RP11-463O9.2-001	RP11-463O9.2	1	0	1	1	3
hsa-miR-423-5p	MIMAT0004748	ENSG00000232354	ENST00000602176	VIPR1-AS1-004	VIPR1-AS1	1	0	1	1	3
hsa-miR-423-5p	MIMAT0004748	ENSG00000234608	ENST00000428207	MAPKAPK5-AS1-001	MAPKAPK5-AS1	1	0	1	1	3
hsa-miR-423-5p	MIMAT0004748	ENSG00000279801	ENST00000624282	RP11-75C10.6-001	RP11-75C10.6	1	0	1	1	3
hsa-miR-423-5p	MIMAT0004748	ENSG00000263931	ENST00000582505	RP11-180P8.1-001	RP11-180P8.1	1	0	1	1	3
hsa-miR-423-5p	MIMAT0004748	ENSG00000272688	ENST00000609924	RP13-270P17.3-001	RP13-270P17.3	1	0	1	1	3
hsa-miR-423-5p	MIMAT0004748	ENSG00000204850	ENST00000377652	CTB-158D10.3-001	CTB-158D10.3	1	0	1	1	3
hsa-miR-423-5p	MIMAT0004748	ENSG00000235919	ENST00000456633	ASH1L-AS1-002	ASH1L-AS1	1	0	1	1	3
hsa-miR-423-5p	MIMAT0004748	ENSG00000259362	ENST00000561283	RP11-307C19.1-001	RP11-307C19.1	1	0	1	1	3
hsa-miR-423-5p	MIMAT0004748	ENSG00000266573	ENST00000583794	RP11-449D8.5-003	RP11-449D8.5	1	0	1	1	3
hsa-miR-423-5p	MIMAT0004748	ENSG00000228358	ENST00000419264	AC113617.1-004	AC113617.1	1	0	1	1	3
hsa-miR-423-5p	MIMAT0004748	ENSG00000234773	ENST00000440004	CTD-2666L21.1-002	CTD-2666L21.1	1	0	1	1	3
hsa-miR-423-5p	MIMAT0004748	ENSG00000215374	ENST00000529456	FAM66B-001	FAM66B	1	0	1	1	3
hsa-miR-423-5p	MIMAT0004748	ENSG00000232593	ENST00000604062	KANTR-004	KANTR	1	0	1	1	3
hsa-miR-423-5p	MIMAT0004748	ENSG00000276255	ENST00000623471	RP5-881P19.7-001	RP5-881P19.7	1	0	1	1	3
hsa-miR-423-5p	MIMAT0004748	ENSG00000255737	ENST00000542466	AGAP2-AS1-001	AGAP2-AS1	1	0	1	1	3
hsa-miR-423-5p	MIMAT0004748	ENSG00000233230	ENST00000417692	AC079807.2-002	AC079807.2	1	0	1	1	3
hsa-miR-423-5p	MIMAT0004748	ENSG00000268324	ENST00000599511	LRRC2-AS1-002	LRRC2-AS1	1	0	1	1	3
hsa-miR-423-5p	MIMAT0004748	ENSG00000278867	ENST00000625123	RP11-640N20.4-001	RP11-640N20.4	1	0	1	1	3
hsa-miR-423-5p	MIMAT0004748	ENSG00000254300	ENST00000518732	LINC01111-001	LINC01111	1	0	1	1	3
hsa-miR-423-5p	MIMAT0004748	ENSG00000224718	ENST00000457217	RP11-222A5.1-001	RP11-222A5.1	1	0	1	1	3
hsa-miR-423-5p	MIMAT0004748	ENSG00000230733	ENST00000444210	AC092171.4-001	AC092171.4	1	0	1	1	3
hsa-miR-423-5p	MIMAT0004748	ENSG00000272183	ENST00000606287	RP11-523H20.3-001	RP11-523H20.3	1	0	1	1	3
hsa-miR-423-5p	MIMAT0004748	ENSG00000227136	ENST00000415959	LINC00595-001	LINC00595	1	0	1	1	3
hsa-miR-423-5p	MIMAT0004748	ENSG00000225138	ENST00000534918	CTD-2228K2.7-001	CTD-2228K2.7	1	0	1	1	3
hsa-miR-423-5p	MIMAT0004748	ENSG00000268895	ENST00000593960	A1BG-AS1-005	A1BG-AS1	1	0	1	1	3
hsa-miR-423-5p	MIMAT0004748	ENSG00000279014	ENST00000623237	CTD-2651B20.8-001	CTD-2651B20.8	1	0	1	1	3
hsa-miR-423-5p	MIMAT0004748	ENSG00000224950	ENST00000456414	RP5-1086K13.1-001	RP5-1086K13.1	1	0	1	1	3
hsa-miR-423-5p	MIMAT0004748	ENSG00000236208	ENST00000437677	C10orf71-AS1-001	C10orf71-AS1	1	0	1	1	3
hsa-miR-423-5p	MIMAT0004748	ENSG00000279660	ENST00000623265	RP11-849N15.3-001	RP11-849N15.3	1	0	1	1	3
hsa-miR-423-5p	MIMAT0004748	ENSG00000182057	ENST00000332965	OGFRP1-001	OGFRP1	1	0	1	1	3
hsa-miR-423-5p	MIMAT0004748	ENSG00000260440	ENST00000567801	LINC01544-001	LINC01544	1	0	1	1	3
hsa-miR-423-5p	MIMAT0004748	ENSG00000277589	ENST00000620689	RP11-333J10.3-001	RP11-333J10.3	1	0	1	1	3
hsa-miR-423-5p	MIMAT0004748	ENSG00000256603	ENST00000543486	RP11-667M19.2-001	RP11-667M19.2	1	0	1	1	3
hsa-miR-423-5p	MIMAT0004748	ENSG00000259238	ENST00000560199	RP11-361D15.2-001	RP11-361D15.2	1	0	1	1	3
hsa-miR-423-5p	MIMAT0004748	ENSG00000233723	ENST00000452840	LINC01122-001	LINC01122	1	0	1	1	3
hsa-miR-423-5p	MIMAT0004748	ENSG00000279822	ENST00000624848	RP11-541M12.6-001	RP11-541M12.6	1	0	1	1	3
hsa-miR-423-5p	MIMAT0004748	ENSG00000226835	ENST00000418242	RP11-148B18.3-001	RP11-148B18.3	1	0	1	1	3
hsa-miR-423-5p	MIMAT0004748	ENSG00000275613	ENST00000610398	CTD-3194G12.2-001	CTD-3194G12.2	1	0	1	1	3
hsa-miR-423-5p	MIMAT0004748	ENSG00000231187	ENST00000506914	RP11-38L15.3-002	RP11-38L15.3	1	0	1	1	3
hsa-miR-423-5p	MIMAT0004748	ENSG00000248118	ENST00000505443	LINC01019-001	LINC01019	1	0	1	1	3
hsa-miR-423-5p	MIMAT0004748	ENSG00000257042	ENST00000538113	RP11-993B23.3-001	RP11-993B23.3	1	0	1	1	3
hsa-miR-423-5p	MIMAT0004748	ENSG00000204934	ENST00000488315	ATP6V0E2-AS1-002	ATP6V0E2-AS1	1	0	1	1	3
hsa-miR-423-5p	MIMAT0004748	ENSG00000276397	ENST00000616078	AC034110.1-201	AC034110.1	1	0	1	1	3
hsa-miR-423-5p	MIMAT0004748	ENSG00000240207	ENST00000495318	RP11-379F4.4-005	RP11-379F4.4	1	0	1	1	3
hsa-miR-423-5p	MIMAT0004748	ENSG00000249993	ENST00000515542	BFSP2-AS1-001	BFSP2-AS1	1	0	1	1	3
hsa-miR-423-5p	MIMAT0004748	ENSG00000231421	ENST00000584763	AC006050.2-002	AC006050.2	1	0	1	1	3
hsa-miR-423-5p	MIMAT0004748	ENSG00000253557	ENST00000518417	RP11-1080G15.1-003	RP11-1080G15.1	1	0	1	1	3
hsa-miR-423-5p	MIMAT0004748	ENSG00000260807	ENST00000568394	RP11-161M6.2-002	RP11-161M6.2	1	0	1	1	3
hsa-miR-423-5p	MIMAT0004748	ENSG00000268388	ENST00000598996	FENDRR-002	FENDRR	1	0	1	1	3
hsa-miR-423-5p	MIMAT0004748	ENSG00000278891	ENST00000623698	RP11-246E12.2-001	RP11-246E12.2	1	0	1	1	3
hsa-miR-423-5p	MIMAT0004748	ENSG00000257366	ENST00000546612	MIR3180-2-001	MIR3180-2	1	0	1	1	3
hsa-miR-423-5p	MIMAT0004748	ENSG00000260267	ENST00000564629	RP11-452L6.5-001	RP11-452L6.5	1	0	1	1	3
hsa-miR-423-5p	MIMAT0004748	ENSG00000280159	ENST00000624221	CTD-2591A1.1-001	CTD-2591A1.1	1	0	1	1	3
hsa-miR-423-5p	MIMAT0004748	ENSG00000179818	ENST00000627528	PCBP1-AS1-098	PCBP1-AS1	1	0	1	1	3
hsa-miR-423-5p	MIMAT0004748	ENSG00000249375	ENST00000518376	CASC11-002	CASC11	1	0	1	1	3
hsa-miR-423-5p	MIMAT0004748	ENSG00000272235	ENST00000607061	RP11-22L13.1-001	RP11-22L13.1	1	0	1	1	3
hsa-miR-423-5p	MIMAT0004748	ENSG00000280160	ENST00000624508	RP11-196G11.3-001	RP11-196G11.3	1	0	1	1	3
hsa-miR-423-5p	MIMAT0004748	ENSG00000260988	ENST00000566715	RP11-285A1.1-001	RP11-285A1.1	1	0	1	1	3
hsa-miR-423-5p	MIMAT0004748	ENSG00000234423	ENST00000457478	LINC01250-001	LINC01250	1	0	1	1	3
hsa-miR-423-5p	MIMAT0004748	ENSG00000275088	ENST00000621095	RP11-442O1.3-001	RP11-442O1.3	1	0	1	1	3
hsa-miR-423-5p	MIMAT0004748	ENSG00000238123	ENST00000436893	MID1IP1-AS1-001	MID1IP1-AS1	1	0	1	1	3
hsa-miR-423-5p	MIMAT0004748	ENSG00000255332	ENST00000577699	RP11-201M22.1-002	RP11-201M22.1	1	0	1	1	3
hsa-miR-423-5p	MIMAT0004748	ENSG00000173811	ENST00000418161	CCDC13-AS1-001	CCDC13-AS1	1	0	1	1	3
hsa-miR-423-5p	MIMAT0004748	ENSG00000250456	ENST00000508484	AC006552.1-001	AC006552.1	1	0	1	1	3
hsa-miR-423-5p	MIMAT0004748	ENSG00000272491	ENST00000606809	RP5-1024N4.4-001	RP5-1024N4.4	1	0	1	1	3
hsa-miR-423-5p	MIMAT0004748	ENSG00000280328	ENST00000623184	RP11-972P1.7-001	RP11-972P1.7	1	0	1	1	3
hsa-miR-423-5p	MIMAT0004748	ENSG00000204241	ENST00000533922	RP11-713P17.3-001	RP11-713P17.3	1	0	1	1	3
hsa-miR-423-5p	MIMAT0004748	ENSG00000247679	ENST00000499900	RP11-1277A3.1-001	RP11-1277A3.1	1	0	1	1	3
hsa-miR-423-5p	MIMAT0004748	ENSG00000265992	ENST00000583516	ESRG-001	ESRG	1	0	1	1	3
hsa-miR-423-5p	MIMAT0004748	ENSG00000224356	ENST00000454752	RP11-151A6.4-001	RP11-151A6.4	1	0	1	1	3
hsa-miR-423-5p	MIMAT0004748	ENSG00000235790	ENST00000608246	RP11-73M7.6-019	RP11-73M7.6	1	0	1	1	3
hsa-miR-423-5p	MIMAT0004748	ENSG00000232377	ENST00000422799	AC016910.1-001	AC016910.1	1	0	1	1	3
hsa-miR-423-5p	MIMAT0004748	ENSG00000248876	ENST00000505002	RP11-231G15.3-001	RP11-231G15.3	1	0	1	1	3
hsa-miR-423-5p	MIMAT0004748	ENSG00000267252	ENST00000586145	LINC01255-006	LINC01255	1	0	1	1	3
hsa-miR-423-5p	MIMAT0004748	ENSG00000245651	ENST00000499481	RP11-620J15.2-001	RP11-620J15.2	1	0	1	1	3
hsa-miR-423-5p	MIMAT0004748	ENSG00000253406	ENST00000523176	AC012613.2-001	AC012613.2	1	0	1	1	3
hsa-miR-423-5p	MIMAT0004748	ENSG00000186148	ENST00000303002	AC013271.3-008	AC013271.3	1	0	1	1	3
hsa-miR-423-5p	MIMAT0004748	ENSG00000228862	ENST00000526470	RP11-91I20.3-001	RP11-91I20.3	1	0	1	1	3
hsa-miR-423-5p	MIMAT0004748	ENSG00000233098	ENST00000577537	CCDC144NL-AS1-001	CCDC144NL-AS1	1	0	1	1	3
hsa-miR-423-5p	MIMAT0004748	ENSG00000260648	ENST00000568093	RP11-133K1.7-001	RP11-133K1.7	1	0	1	1	3
hsa-miR-423-5p	MIMAT0004748	ENSG00000177112	ENST00000529979	MRVI1-AS1-002	MRVI1-AS1	1	0	1	1	3
hsa-miR-423-5p	MIMAT0004748	ENSG00000264112	ENST00000585065	RP11-159D12.2-001	RP11-159D12.2	1	0	1	1	3
hsa-miR-423-5p	MIMAT0004748	ENSG00000272734	ENST00000609170	ADIRF-AS1-004	ADIRF-AS1	1	0	1	1	3
hsa-miR-423-5p	MIMAT0004748	ENSG00000229851	ENST00000414053	ARSD-AS1-001	ARSD-AS1	1	0	1	1	3
hsa-miR-423-5p	MIMAT0004748	ENSG00000233937	ENST00000506340	CTC-338M12.4-003	CTC-338M12.4	1	0	1	1	3
hsa-miR-423-5p	MIMAT0004748	ENSG00000234864	ENST00000439913	AL022344.5-001	AL022344.5	1	0	1	1	3
hsa-miR-423-5p	MIMAT0004748	ENSG00000243415	ENST00000491932	RP11-274H2.2-002	RP11-274H2.2	1	0	1	1	3
hsa-miR-423-5p	MIMAT0004748	ENSG00000262445	ENST00000574520	CTD-2545H1.2-001	CTD-2545H1.2	1	0	1	1	3
hsa-miR-423-5p	MIMAT0004748	ENSG00000267364	ENST00000585387	RP11-47L3.1-001	RP11-47L3.1	1	0	1	1	3
hsa-miR-423-5p	MIMAT0004748	ENSG00000099869	ENST00000445504	IGF2-AS-002	IGF2-AS	1	0	1	1	3
hsa-miR-423-5p	MIMAT0004748	ENSG00000272017	ENST00000607332	RP1-199J3.7-001	RP1-199J3.7	1	0	1	1	3
hsa-miR-423-5p	MIMAT0004748	ENSG00000246223	ENST00000556462	LINC01550-004	LINC01550	1	0	1	1	3
hsa-miR-423-5p	MIMAT0004748	ENSG00000225791	ENST00000606714	TRAM2-AS1-003	TRAM2-AS1	1	0	1	1	3
hsa-miR-423-5p	MIMAT0004748	ENSG00000232006	ENST00000628203	AC005537.2-006	AC005537.2	1	0	1	1	3
hsa-miR-423-5p	MIMAT0004748	ENSG00000248416	ENST00000502923	RP11-1191J2.4-001	RP11-1191J2.4	1	0	1	1	3
hsa-miR-423-5p	MIMAT0004748	ENSG00000249395	ENST00000522183	CASC9-003	CASC9	1	0	1	1	3
hsa-miR-423-5p	MIMAT0004748	ENSG00000263089	ENST00000576014	RP11-166P13.4-001	RP11-166P13.4	1	0	1	1	3
hsa-miR-423-5p	MIMAT0004748	ENSG00000272264	ENST00000607017	RP11-92K15.3-001	RP11-92K15.3	1	0	1	1	3
hsa-miR-423-5p	MIMAT0004748	ENSG00000273164	ENST00000609839	AC000095.11-001	AC000095.11	1	0	1	1	3
hsa-miR-423-5p	MIMAT0004748	ENSG00000232265	ENST00000595668	XXyac-YX155B6.5-009	XXyac-YX155B6.5	1	0	1	1	3
hsa-miR-423-5p	MIMAT0004748	ENSG00000249669	ENST00000505254	MIR143HG-001	MIR143HG	1	0	1	1	3
hsa-miR-423-5p	MIMAT0004748	ENSG00000271119	ENST00000605200	CTD-2012J19.3-001	CTD-2012J19.3	1	0	1	1	3
hsa-miR-423-5p	MIMAT0004748	ENSG00000279700	ENST00000622917	RP13-554M15.2-001	RP13-554M15.2	1	0	1	1	3
hsa-miR-423-5p	MIMAT0004748	ENSG00000258642	ENST00000555481	RP11-219E7.2-001	RP11-219E7.2	1	0	1	1	3
hsa-miR-423-5p	MIMAT0004748	ENSG00000260493	ENST00000562577	RP11-219B4.7-001	RP11-219B4.7	1	0	1	1	3
hsa-miR-423-5p	MIMAT0004748	ENSG00000174365	ENST00000437028	SNHG11-013	SNHG11	1	0	1	1	3
hsa-miR-423-5p	MIMAT0004748	ENSG00000225420	ENST00000413234	AC104134.2-001	AC104134.2	1	0	1	1	3
hsa-miR-423-5p	MIMAT0004748	ENSG00000204380	ENST00000342892	AC005042.4-001	AC005042.4	1	0	1	1	3
hsa-miR-423-5p	MIMAT0004748	ENSG00000224382	ENST00000454152	LINC00703-001	LINC00703	1	0	1	1	3
hsa-miR-423-5p	MIMAT0004748	ENSG00000228878	ENST00000424194	SEPT7-AS1-003	SEPT7-AS1	1	0	1	1	3
hsa-miR-423-5p	MIMAT0004748	ENSG00000255571	ENST00000538734	LINC00925-004	LINC00925	1	0	1	1	3
hsa-miR-423-5p	MIMAT0004748	ENSG00000237125	ENST00000515350	HAND2-AS1-003	HAND2-AS1	1	0	1	1	3
hsa-miR-423-5p	MIMAT0004748	ENSG00000250772	ENST00000503266	LINC01365-001	LINC01365	1	0	1	1	3
hsa-miR-423-5p	MIMAT0004748	ENSG00000249201	ENST00000505972	CTD-3080P12.3-001	CTD-3080P12.3	1	0	1	1	3
hsa-miR-423-5p	MIMAT0004748	ENSG00000279388	ENST00000624926	RP11-897M7.2-001	RP11-897M7.2	1	0	1	1	3
hsa-miR-423-5p	MIMAT0004748	ENSG00000262558	ENST00000571512	RP11-1260E13.3-001	RP11-1260E13.3	1	0	1	1	3
hsa-miR-423-5p	MIMAT0004748	ENSG00000120055	ENST00000625129	C10orf95-002	C10orf95	1	0	1	1	3
hsa-miR-423-5p	MIMAT0004748	ENSG00000227036	ENST00000577773	LINC00511-012	LINC00511	1	0	1	1	3
hsa-miR-423-5p	MIMAT0004748	ENSG00000254369	ENST00000518848	HOXA-AS3-003	HOXA-AS3	1	0	1	1	3
hsa-miR-423-5p	MIMAT0004748	ENSG00000267549	ENST00000587004	AC006116.17-001	AC006116.17	1	0	1	1	3
hsa-miR-423-5p	MIMAT0004748	ENSG00000259772	ENST00000558109	RP11-16E12.2-003	RP11-16E12.2	1	0	1	1	3
hsa-miR-423-5p	MIMAT0004748	ENSG00000271151	ENST00000605739	RP11-394I13.2-001	RP11-394I13.2	1	0	1	1	3
hsa-miR-423-5p	MIMAT0004748	ENSG00000231074	ENST00000602698	HCG18-017	HCG18	1	0	1	1	3
hsa-miR-423-5p	MIMAT0004748	ENSG00000258663	ENST00000554041	RP11-123M6.2-001	RP11-123M6.2	1	0	1	1	3
hsa-miR-423-5p	MIMAT0004748	ENSG00000182824	ENST00000342888	AC008132.15-001	AC008132.15	1	0	1	1	3
hsa-miR-423-5p	MIMAT0004748	ENSG00000267702	ENST00000587344	RP11-53B2.2-001	RP11-53B2.2	1	0	1	1	3
hsa-miR-423-5p	MIMAT0004748	ENSG00000231856	ENST00000618844	RP11-327P2.5-002	RP11-327P2.5	1	0	1	1	3
hsa-miR-423-5p	MIMAT0004748	ENSG00000237017	ENST00000452097	AC012314.8-001	AC012314.8	1	0	1	1	3
hsa-miR-423-5p	MIMAT0004748	ENSG00000259285	ENST00000559684	CTD-2330J20.2-001	CTD-2330J20.2	1	0	1	1	3
hsa-miR-423-5p	MIMAT0004748	ENSG00000251322	ENST00000414786	SHANK3-001	SHANK3	1	0	1	1	3
hsa-miR-423-5p	MIMAT0004748	ENSG00000236499	ENST00000423736	LINC00896-201	LINC00896	1	0	1	1	3
hsa-miR-423-5p	MIMAT0004748	ENSG00000177406	ENST00000318291	RP11-218M22.1-002	RP11-218M22.1	1	0	1	1	3
hsa-miR-423-5p	MIMAT0004748	ENSG00000272787	ENST00000609736	KB-226F1.2-001	KB-226F1.2	1	0	1	1	3
hsa-miR-423-5p	MIMAT0004748	ENSG00000225655	ENST00000458364	PGM5-AS1-002	PGM5-AS1	1	0	1	1	3
hsa-miR-423-5p	MIMAT0004748	ENSG00000229921	ENST00000414364	KIF25-AS1-001	KIF25-AS1	1	0	1	1	3
hsa-miR-423-5p	MIMAT0004748	ENSG00000224698	ENST00000419814	RP11-131J3.1-001	RP11-131J3.1	1	0	1	1	3
hsa-miR-423-5p	MIMAT0004748	ENSG00000279409	ENST00000623564	RP11-133K1.9-001	RP11-133K1.9	1	0	1	1	3
hsa-miR-423-5p	MIMAT0004748	ENSG00000243795	ENST00000490139	RP11-572M11.3-001	RP11-572M11.3	1	0	1	1	3
hsa-miR-423-5p	MIMAT0004748	ENSG00000228434	ENST00000447643	AC004951.6-001	AC004951.6	1	0	1	1	3
hsa-miR-423-5p	MIMAT0004748	ENSG00000125804	ENST00000439881	FAM182A-004	FAM182A	1	0	1	1	3
hsa-miR-423-5p	MIMAT0004748	ENSG00000231528	ENST00000434051	FAM225A-002	FAM225A	1	0	1	1	3
hsa-miR-423-5p	MIMAT0004748	ENSG00000259005	ENST00000556370	RP3-449M8.6-001	RP3-449M8.6	1	0	1	1	3
hsa-miR-423-5p	MIMAT0004748	ENSG00000281649	ENST00000625218	EBLN3-002	EBLN3	1	0	1	1	3
hsa-miR-423-5p	MIMAT0004748	ENSG00000279584	ENST00000624894	AC005593.2-001	AC005593.2	1	0	1	1	3
hsa-miR-423-5p	MIMAT0004748	ENSG00000274628	ENST00000611307	FAM95B1-006	FAM95B1	1	0	1	1	3
hsa-miR-423-5p	MIMAT0004748	ENSG00000255224	ENST00000524499	CTD-3065J16.9-001	CTD-3065J16.9	1	0	1	1	3
hsa-miR-423-5p	MIMAT0004748	ENSG00000258498	ENST00000617327	DIO3OS-201	DIO3OS	1	0	1	1	3
hsa-miR-423-5p	MIMAT0004748	ENSG00000272342	ENST00000606068	RP13-539J13.1-001	RP13-539J13.1	1	0	1	1	3
hsa-miR-423-5p	MIMAT0004748	ENSG00000225234	ENST00000453806	TRAPPC12-AS1-001	TRAPPC12-AS1	1	0	1	1	3
hsa-miR-423-5p	MIMAT0004748	ENSG00000227195	ENST00000601079	MIR663AHG-009	MIR663AHG	1	0	1	1	3
hsa-miR-423-5p	MIMAT0004748	ENSG00000231721	ENST00000451786	LINC-PINT-001	LINC-PINT	1	0	1	1	3
hsa-miR-423-5p	MIMAT0004748	ENSG00000279083	ENST00000623623	RP11-395N21.2-001	RP11-395N21.2	1	0	1	1	3
hsa-miR-423-5p	MIMAT0004748	ENSG00000230314	ENST00000606532	ELOVL2-AS1-003	ELOVL2-AS1	1	0	1	1	3
hsa-miR-423-5p	MIMAT0004748	ENSG00000183250	ENST00000397841	LINC01547-002	LINC01547	1	0	1	1	3
hsa-miR-423-5p	MIMAT0004748	ENSG00000228784	ENST00000449086	LINC00954-001	LINC00954	1	0	1	1	3
hsa-miR-423-5p	MIMAT0004748	ENSG00000277870	ENST00000624001	FAM230A-002	FAM230A	1	0	1	1	3
hsa-miR-423-5p	MIMAT0004748	ENSG00000250590	ENST00000514767	RP11-565A3.2-003	RP11-565A3.2	1	0	1	1	3
hsa-miR-423-5p	MIMAT0004748	ENSG00000225470	ENST00000602772	JPX-004	JPX	1	0	1	1	3
hsa-miR-423-5p	MIMAT0004748	ENSG00000261222	ENST00000577560	CTD-2006K23.1-003	CTD-2006K23.1	1	0	1	1	3
hsa-miR-423-5p	MIMAT0004748	ENSG00000266290	ENST00000584805	RP11-159D12.10-001	RP11-159D12.10	1	0	1	1	3
hsa-miR-423-5p	MIMAT0004748	ENSG00000234730	ENST00000428205	AF241725.4-001	AF241725.4	1	0	1	1	3
hsa-miR-423-5p	MIMAT0004748	ENSG00000276073	ENST00000618285	RP5-1125A11.7-001	RP5-1125A11.7	1	0	1	1	3
hsa-miR-423-5p	MIMAT0004748	ENSG00000249859	ENST00000518528	PVT1-009	PVT1	1	0	1	1	3
hsa-miR-423-5p	MIMAT0004748	ENSG00000255655	ENST00000539987	RP11-256L11.3-001	RP11-256L11.3	1	0	1	1	3
hsa-miR-423-5p	MIMAT0004748	ENSG00000226944	ENST00000455744	RP1-120G22.11-001	RP1-120G22.11	1	0	1	1	3
hsa-miR-423-5p	MIMAT0004748	ENSG00000253479	ENST00000519557	RP11-744J10.3-002	RP11-744J10.3	1	0	1	1	3
hsa-miR-423-5p	MIMAT0004748	ENSG00000225684	ENST00000423546	FAM225B-001	FAM225B	1	0	1	1	3
hsa-miR-423-5p	MIMAT0004748	ENSG00000229951	ENST00000445878	FLJ31356-002	FLJ31356	1	0	1	1	3
hsa-miR-423-5p	MIMAT0004748	ENSG00000261409	ENST00000564206	RP6-24A23.7-001	RP6-24A23.7	1	0	1	1	3
hsa-miR-423-5p	MIMAT0004748	ENSG00000249290	ENST00000502712	RP11-68L1.2-003	RP11-68L1.2	1	0	1	1	3
hsa-miR-423-5p	MIMAT0004748	ENSG00000270021	ENST00000602502	CTC-203F4.2-001	CTC-203F4.2	1	0	1	1	3
hsa-miR-423-5p	MIMAT0004748	ENSG00000279428	ENST00000624514	RP11-258F1.2-001	RP11-258F1.2	1	0	1	1	3
hsa-miR-423-5p	MIMAT0004748	ENSG00000260179	ENST00000565563	RP5-902P8.12-001	RP5-902P8.12	1	0	1	1	3
hsa-miR-423-5p	MIMAT0004748	ENSG00000231551	ENST00000445243	RP11-495P10.1-001	RP11-495P10.1	1	0	1	1	3
hsa-miR-423-5p	MIMAT0004748	ENSG00000253656	ENST00000523502	KB-1568E2.1-001	KB-1568E2.1	1	0	1	1	3
hsa-miR-423-5p	MIMAT0004748	ENSG00000168367	ENST00000595169	LINC00917-004	LINC00917	1	0	1	1	3
hsa-miR-423-5p	MIMAT0004748	ENSG00000230910	ENST00000604392	RP3-525N10.2-002	RP3-525N10.2	1	0	1	1	3
hsa-miR-423-5p	MIMAT0004748	ENSG00000267580	ENST00000589932	CTD-2540B15.11-001	CTD-2540B15.11	1	0	1	1	3
hsa-miR-423-5p	MIMAT0004748	ENSG00000229404	ENST00000415469	LINC00858-001	LINC00858	1	0	1	1	3
hsa-miR-423-5p	MIMAT0004748	ENSG00000280239	ENST00000624986	CTB-50L17.8-001	CTB-50L17.8	1	0	1	1	3
hsa-miR-423-5p	MIMAT0004748	ENSG00000254614	ENST00000526623	AP003068.23-001	AP003068.23	1	0	1	1	3
hsa-miR-423-5p	MIMAT0004748	ENSG00000261781	ENST00000569711	RP11-174G17.2-001	RP11-174G17.2	1	0	1	1	3
hsa-miR-423-5p	MIMAT0004748	ENSG00000260565	ENST00000568970	CTD-2270P14.1-008	CTD-2270P14.1	1	0	1	1	3
hsa-miR-423-5p	MIMAT0004748	ENSG00000277991	ENST00000623374	CH507-338C24.1-001	CH507-338C24.1	1	0	1	1	3
hsa-miR-423-5p	MIMAT0004748	ENSG00000175147	ENST00000310916	TMEM51-AS1-001	TMEM51-AS1	1	0	1	1	3
hsa-miR-423-5p	MIMAT0004748	ENSG00000280407	ENST00000622924	RP13-516M14.8-201	RP13-516M14.8	1	0	1	1	3
hsa-miR-423-5p	MIMAT0004748	ENSG00000224506	ENST00000423208	RP1-293L8.2-001	RP1-293L8.2	1	0	1	1	3
hsa-miR-423-5p	MIMAT0004748	ENSG00000261242	ENST00000561909	CTD-2302E22.4-001	CTD-2302E22.4	1	0	1	1	3
hsa-miR-423-5p	MIMAT0004748	ENSG00000204706	ENST00000626773	MAMDC2-AS1-015	MAMDC2-AS1	1	0	1	1	3
hsa-miR-423-5p	MIMAT0004748	ENSG00000279278	ENST00000624350	CH17-264L24.1-001	CH17-264L24.1	1	0	1	1	3
hsa-miR-423-5p	MIMAT0004748	ENSG00000230487	ENST00000532358	PSMG3-AS1-005	PSMG3-AS1	1	0	1	1	3
hsa-miR-423-5p	MIMAT0004748	ENSG00000271880	ENST00000433214	AGAP11-001	AGAP11	1	0	1	1	3
hsa-miR-423-5p	MIMAT0004748	ENSG00000187621	ENST00000483087	TCL6-004	TCL6	1	0	1	1	3
hsa-miR-423-5p	MIMAT0004748	ENSG00000177822	ENST00000315302	AC108142.1-001	AC108142.1	1	0	1	1	3
hsa-miR-423-5p	MIMAT0004748	ENSG00000226969	ENST00000449154	RP11-547D24.3-002	RP11-547D24.3	1	0	1	1	3
hsa-miR-423-5p	MIMAT0004748	ENSG00000258857	ENST00000556713	RP11-247L20.3-001	RP11-247L20.3	1	0	1	1	3
hsa-miR-423-5p	MIMAT0004748	ENSG00000223837	ENST00000415875	BRD2-IT1-001	BRD2-IT1	1	0	1	1	3
hsa-miR-423-5p	MIMAT0004748	ENSG00000237187	ENST00000510254	NR2F1-AS1-005	NR2F1-AS1	1	0	1	1	3
hsa-miR-423-5p	MIMAT0004748	ENSG00000248307	ENST00000513895	LINC00616-004	LINC00616	1	0	1	1	3
hsa-miR-423-5p	MIMAT0004748	ENSG00000225731	ENST00000437426	AP001627.1-001	AP001627.1	1	0	1	1	3
hsa-miR-423-5p	MIMAT0004748	ENSG00000276814	ENST00000616571	RP1-228P16.8-001	RP1-228P16.8	1	0	1	1	3
hsa-miR-423-5p	MIMAT0004748	ENSG00000196366	ENST00000624034	C9orf163-001	C9orf163	1	0	1	1	3
hsa-miR-423-5p	MIMAT0004748	ENSG00000256028	ENST00000540866	RP11-197N18.2-001	RP11-197N18.2	1	0	1	1	3
hsa-miR-423-5p	MIMAT0004748	ENSG00000228021	ENST00000449693	RP11-383C5.3-002	RP11-383C5.3	1	0	1	1	3
hsa-miR-423-5p	MIMAT0004748	ENSG00000225889	ENST00000451350	AC074289.1-002	AC074289.1	1	0	1	1	3
hsa-miR-423-5p	MIMAT0004748	ENSG00000234327	ENST00000623522	AC012146.7-004	AC012146.7	1	0	1	1	3
hsa-miR-423-5p	MIMAT0004748	ENSG00000257530	ENST00000551974	RP11-843B15.2-001	RP11-843B15.2	1	0	1	1	3
hsa-miR-423-5p	MIMAT0004748	ENSG00000232098	ENST00000444227	CTD-2619J13.14-201	CTD-2619J13.14	1	0	1	1	3
hsa-miR-423-5p	MIMAT0004748	ENSG00000180846	ENST00000314315	CSNK1G2-AS1-201	CSNK1G2-AS1	1	0	1	1	3
hsa-miR-423-5p	MIMAT0004748	ENSG00000226688	ENST00000427300	ENTPD1-AS1-008	ENTPD1-AS1	1	0	1	1	3
hsa-miR-423-5p	MIMAT0004748	ENSG00000230937	ENST00000451937	MIR205HG-003	MIR205HG	1	0	1	1	3
hsa-miR-423-5p	MIMAT0004748	ENSG00000263394	ENST00000583141	RP11-160E2.19-001	RP11-160E2.19	1	0	1	1	3
hsa-miR-423-5p	MIMAT0004748	ENSG00000225313	ENST00000587696	RP11-415J8.3-002	RP11-415J8.3	1	0	1	1	3
hsa-miR-423-5p	MIMAT0004748	ENSG00000203993	ENST00000371417	ARRDC1-AS1-001	ARRDC1-AS1	1	0	1	1	3
hsa-miR-423-5p	MIMAT0004748	ENSG00000253878	ENST00000523905	RP11-347C18.3-001	RP11-347C18.3	1	0	1	1	3
hsa-miR-423-5p	MIMAT0004748	ENSG00000226180	ENST00000538868	RP11-278A23.1-001	RP11-278A23.1	1	0	1	1	3
hsa-miR-423-5p	MIMAT0004748	ENSG00000259840	ENST00000567096	LA16c-380A1.1-001	LA16c-380A1.1	1	0	1	1	3
hsa-miR-423-5p	MIMAT0004748	ENSG00000267201	ENST00000587826	AC005624.2-001	AC005624.2	1	0	1	1	3
hsa-miR-423-5p	MIMAT0004748	ENSG00000258729	ENST00000554299	RP11-404P21.6-001	RP11-404P21.6	1	0	1	1	3
hsa-miR-423-5p	MIMAT0004748	ENSG00000233030	ENST00000428289	RP11-196G18.3-001	RP11-196G18.3	1	0	1	1	3
hsa-miR-423-5p	MIMAT0004748	ENSG00000267767	ENST00000590963	CTC-523E23.4-001	CTC-523E23.4	1	0	1	1	3
hsa-miR-423-5p	MIMAT0004748	ENSG00000231156	ENST00000423433	AC093702.1-001	AC093702.1	1	0	1	1	3
hsa-miR-423-5p	MIMAT0004748	ENSG00000259354	ENST00000559869	RP11-519G16.3-001	RP11-519G16.3	1	0	1	1	3
hsa-miR-423-5p	MIMAT0004748	ENSG00000278022	ENST00000618697	RP11-35O15.2-001	RP11-35O15.2	1	0	1	1	3
hsa-miR-423-5p	MIMAT0004748	ENSG00000229743	ENST00000434764	LINC01159-002	LINC01159	1	0	1	1	3
hsa-miR-423-5p	MIMAT0004748	ENSG00000243155	ENST00000358073	RP11-46A10.5-001	RP11-46A10.5	1	0	1	1	3
hsa-miR-423-5p	MIMAT0004748	ENSG00000267304	ENST00000586675	AC004637.1-001	AC004637.1	1	0	1	1	3
hsa-miR-423-5p	MIMAT0004748	ENSG00000188280	ENST00000610338	FAM230A-004	FAM230A	1	0	1	1	3
hsa-miR-423-5p	MIMAT0004748	ENSG00000249894	ENST00000514791	RP11-434D9.2-001	RP11-434D9.2	1	0	1	1	3
hsa-miR-423-5p	MIMAT0004748	ENSG00000279964	ENST00000623048	RP11-69J7.1-001	RP11-69J7.1	1	0	1	1	3
hsa-miR-423-5p	MIMAT0004748	ENSG00000223842	ENST00000420237	RP11-135J2.3-001	RP11-135J2.3	1	0	1	1	3
hsa-miR-423-5p	MIMAT0004748	ENSG00000281103	ENST00000629357	TRG-AS1-001	TRG-AS1	1	0	1	1	3
hsa-miR-423-5p	MIMAT0004748	ENSG00000132832	ENST00000255183	LINC01260-001	LINC01260	1	0	1	1	3
hsa-miR-423-5p	MIMAT0004748	ENSG00000272163	ENST00000607058	GS1-72M22.1-001	GS1-72M22.1	1	0	1	1	3
hsa-miR-423-5p	MIMAT0004748	ENSG00000256092	ENST00000602918	RP13-942N8.1-002	RP13-942N8.1	1	0	1	1	3
hsa-miR-423-5p	MIMAT0004748	ENSG00000203395	ENST00000366218	AC015969.3-001	AC015969.3	1	0	1	1	3
hsa-miR-423-5p	MIMAT0004748	ENSG00000231609	ENST00000437346	AC009501.4-002	AC009501.4	1	0	1	1	3
hsa-miR-423-5p	MIMAT0004748	ENSG00000267078	ENST00000588104	RP11-666A8.9-001	RP11-666A8.9	1	0	1	1	3
hsa-miR-423-5p	MIMAT0004748	ENSG00000253205	ENST00000522265	CTD-3046C4.1-003	CTD-3046C4.1	1	0	1	1	3
hsa-miR-423-5p	MIMAT0004748	ENSG00000236947	ENST00000452465	RP11-98G7.1-002	RP11-98G7.1	1	0	1	1	3
hsa-miR-423-5p	MIMAT0004748	ENSG00000267607	ENST00000589379	CTD-2369P2.8-001	CTD-2369P2.8	1	0	1	1	3
hsa-miR-423-5p	MIMAT0004748	ENSG00000280281	ENST00000623195	RP11-340L3.1-001	RP11-340L3.1	1	0	1	1	3
hsa-miR-423-5p	MIMAT0004748	ENSG00000273311	ENST00000609958	DGCR11-001	DGCR11	1	0	1	1	3
hsa-miR-423-5p	MIMAT0004748	ENSG00000261118	ENST00000565310	RP11-104N10.1-002	RP11-104N10.1	1	0	1	1	3
hsa-miR-423-5p	MIMAT0004748	ENSG00000279802	ENST00000624411	CTA-544A11.1-001	CTA-544A11.1	1	0	1	1	3
hsa-miR-423-5p	MIMAT0004748	ENSG00000184906	ENST00000621140	AC129778.2-001	AC129778.2	1	0	1	1	3
hsa-miR-423-5p	MIMAT0004748	ENSG00000176593	ENST00000550135	CTD-2368P22.1-001	CTD-2368P22.1	1	0	1	1	3
hsa-miR-423-5p	MIMAT0004748	ENSG00000234775	ENST00000421055	RP11-335O13.7-001	RP11-335O13.7	1	0	1	1	3
hsa-miR-423-5p	MIMAT0004748	ENSG00000258168	ENST00000548687	RP11-588H23.3-001	RP11-588H23.3	1	0	1	1	3
hsa-miR-423-5p	MIMAT0004748	ENSG00000260037	ENST00000563041	CTD-2524L6.3-002	CTD-2524L6.3	1	0	1	1	3
hsa-miR-423-5p	MIMAT0004748	ENSG00000258908	ENST00000554678	RP11-203M5.8-001	RP11-203M5.8	1	0	1	1	3
hsa-miR-423-5p	MIMAT0004748	ENSG00000188660	ENST00000448049	LINC00319-001	LINC00319	1	0	1	1	3
hsa-miR-423-5p	MIMAT0004748	ENSG00000224721	ENST00000455232	AC007182.6-001	AC007182.6	1	0	1	1	3
hsa-miR-423-5p	MIMAT0004748	ENSG00000219665	ENST00000591838	CTD-2006C1.2-007	CTD-2006C1.2	1	0	1	1	3
hsa-miR-423-5p	MIMAT0004748	ENSG00000227136	ENST00000459633	LINC00595-004	LINC00595	1	0	1	1	3
hsa-miR-423-5p	MIMAT0004748	ENSG00000253715	ENST00000510610	RP11-706C16.8-001	RP11-706C16.8	1	0	1	1	3
hsa-miR-423-5p	MIMAT0004748	ENSG00000233496	ENST00000442328	SYNJ2-IT1-001	SYNJ2-IT1	1	0	1	1	3
hsa-miR-423-5p	MIMAT0004748	ENSG00000268895	ENST00000594950	A1BG-AS1-002	A1BG-AS1	1	0	1	1	3
hsa-miR-423-5p	MIMAT0004748	ENSG00000203506	ENST00000626662	RBMS3-AS2-003	RBMS3-AS2	1	0	1	1	3
hsa-miR-423-5p	MIMAT0004748	ENSG00000235597	ENST00000429464	LINC01102-004	LINC01102	1	0	1	1	3
hsa-miR-423-5p	MIMAT0004748	ENSGR0000236871	ENSTR0000434938	LINC00106-002	LINC00106	1	0	1	1	3
hsa-miR-423-5p	MIMAT0004748	ENSG00000261668	ENST00000565254	RP11-50D9.3-001	RP11-50D9.3	1	0	1	1	3
hsa-miR-423-5p	MIMAT0004748	ENSG00000274979	ENST00000613291	RP11-1143G9.5-001	RP11-1143G9.5	1	0	1	1	3
hsa-miR-423-5p	MIMAT0004748	ENSG00000255313	ENST00000531948	RP11-1082L8.2-001	RP11-1082L8.2	1	0	1	1	3
hsa-miR-423-5p	MIMAT0004748	ENSG00000182057	ENST00000446578	OGFRP1-003	OGFRP1	1	0	1	1	3
hsa-miR-423-5p	MIMAT0004748	ENSG00000204055	ENST00000451229	RP11-247A12.2-002	RP11-247A12.2	1	0	1	1	3
hsa-miR-423-5p	MIMAT0004748	ENSG00000227307	ENST00000414774	RP11-95I16.2-001	RP11-95I16.2	1	0	1	1	3
hsa-miR-423-5p	MIMAT0004748	ENSG00000231768	ENST00000435574	LINC01354-001	LINC01354	1	0	1	1	3
hsa-miR-423-5p	MIMAT0004748	ENSG00000247556	ENST00000560706	OIP5-AS1-010	OIP5-AS1	1	0	1	1	3
hsa-miR-423-5p	MIMAT0004748	ENSG00000253955	ENST00000519897	CTB-33O18.3-002	CTB-33O18.3	1	0	1	1	3
hsa-miR-423-5p	MIMAT0004748	ENSG00000224307	ENST00000455981	RP11-344B5.2-001	RP11-344B5.2	1	0	1	1	3
hsa-miR-423-5p	MIMAT0004748	ENSG00000229539	ENST00000451507	RP11-119B16.2-001	RP11-119B16.2	1	0	1	1	3
hsa-miR-423-5p	MIMAT0004748	ENSG00000261136	ENST00000564211	RP11-37C7.3-001	RP11-37C7.3	1	0	1	1	3
hsa-miR-423-5p	MIMAT0004748	ENSG00000269473	ENST00000595059	CTD-2619J13.19-001	CTD-2619J13.19	1	0	1	1	3
hsa-miR-423-5p	MIMAT0004748	ENSG00000279162	ENST00000624546	CTD-3126B10.2-001	CTD-3126B10.2	1	0	1	1	3
hsa-miR-423-5p	MIMAT0004748	ENSG00000251226	ENST00000513405	RP11-469N6.1-001	RP11-469N6.1	1	0	1	1	3
hsa-miR-423-5p	MIMAT0004748	ENSG00000214548	ENST00000556736	MEG3-025	MEG3	1	0	1	1	3
hsa-miR-423-5p	MIMAT0004748	ENSG00000271714	ENST00000606270	CTD-2377O17.1-001	CTD-2377O17.1	1	0	1	1	3
hsa-miR-423-5p	MIMAT0004748	ENSG00000279825	ENST00000625108	CTC-457L16.1-001	CTC-457L16.1	1	0	1	1	3
hsa-miR-423-5p	MIMAT0004748	ENSG00000275620	ENST00000612722	FLJ16779-001	FLJ16779	1	0	1	1	3
hsa-miR-423-5p	MIMAT0004748	ENSG00000258754	ENST00000553818	LINC01579-002	LINC01579	1	0	1	1	3
hsa-miR-423-5p	MIMAT0004748	ENSG00000280594	ENST00000630155	AP000432.1-002	AP000432.1	1	0	1	1	3
hsa-miR-423-5p	MIMAT0004748	ENSG00000237125	ENST00000502896	HAND2-AS1-008	HAND2-AS1	1	0	1	1	3
hsa-miR-423-5p	MIMAT0004748	ENSG00000260066	ENST00000565428	CTD-2587M23.1-001	CTD-2587M23.1	1	0	1	1	3
hsa-miR-423-5p	MIMAT0004748	ENSG00000276399	ENST00000612344	FLJ36000-001	FLJ36000	1	0	1	1	3
hsa-miR-423-5p	MIMAT0004748	ENSG00000280011	ENST00000624215	RP4-671O14.7-001	RP4-671O14.7	1	0	1	1	3
hsa-miR-423-5p	MIMAT0004748	ENSG00000246130	ENST00000501897	RP11-875O11.2-001	RP11-875O11.2	1	0	1	1	3
hsa-miR-423-5p	MIMAT0004748	ENSG00000253557	ENST00000520920	RP11-1080G15.1-002	RP11-1080G15.1	1	0	1	1	3
hsa-miR-423-5p	MIMAT0004748	ENSG00000258927	ENST00000555032	RP11-1070N10.5-001	RP11-1070N10.5	1	0	1	1	3
hsa-miR-423-5p	MIMAT0004748	ENSG00000268388	ENST00000599749	FENDRR-001	FENDRR	1	0	1	1	3
hsa-miR-423-5p	MIMAT0004748	ENSG00000281332	ENST00000628855	LINC00997-001	LINC00997	1	0	1	1	3
hsa-miR-423-5p	MIMAT0004748	ENSG00000279516	ENST00000623511	FAM230C-001	FAM230C	1	0	1	1	3
hsa-miR-423-5p	MIMAT0004748	ENSG00000236117	ENST00000450750	RP4-754E20__A.5-001	RP4-754E20__A.5	1	0	1	1	3
hsa-miR-423-5p	MIMAT0004748	ENSG00000274383	ENST00000619654	CTD-2017F17.2-001	CTD-2017F17.2	1	0	1	1	3
hsa-miR-423-5p	MIMAT0004748	ENSG00000272236	ENST00000606834	XXbac-BPG170G13.32-001	XXbac-BPG170G13.32	1	0	1	1	3
hsa-miR-423-5p	MIMAT0004748	ENSG00000280161	ENST00000624602	CTC-205M6.1-001	CTC-205M6.1	1	0	1	1	3
hsa-miR-423-5p	MIMAT0004748	ENSG00000246877	ENST00000501931	DNM1P35-001	DNM1P35	1	0	1	1	3
hsa-miR-423-5p	MIMAT0004748	ENSG00000225982	ENST00000428646	RP11-538D16.3-001	RP11-538D16.3	1	0	1	1	3
hsa-miR-423-5p	MIMAT0004748	ENSG00000258610	ENST00000553758	RP11-488C13.7-001	RP11-488C13.7	1	0	1	1	3
hsa-miR-423-5p	MIMAT0004748	ENSG00000232973	ENST00000413828	CYP1B1-AS1-001	CYP1B1-AS1	1	0	1	1	3
hsa-miR-423-5p	MIMAT0004748	ENSG00000241357	ENST00000492523	RP11-758P17.2-001	RP11-758P17.2	1	0	1	1	3
hsa-miR-423-5p	MIMAT0004748	ENSG00000229587	ENST00000455336	RP11-197P3.5-001	RP11-197P3.5	1	0	1	1	3
hsa-miR-423-5p	MIMAT0004748	ENSG00000235790	ENST00000608332	RP11-73M7.6-016	RP11-73M7.6	1	0	1	1	3
hsa-miR-423-5p	MIMAT0004748	ENSG00000228242	ENST00000628785	AC093495.4-004	AC093495.4	1	0	1	1	3
hsa-miR-423-5p	MIMAT0004748	ENSG00000267252	ENST00000586947	LINC01255-004	LINC01255	1	0	1	1	3
hsa-miR-423-5p	MIMAT0004748	ENSG00000245651	ENST00000548955	RP11-620J15.2-002	RP11-620J15.2	1	0	1	1	3
hsa-miR-423-5p	MIMAT0004748	ENSG00000186148	ENST00000417926	AC013271.3-001	AC013271.3	1	0	1	1	3
hsa-miR-423-5p	MIMAT0004748	ENSG00000229852	ENST00000421315	RP11-398K22.12-001	RP11-398K22.12	1	0	1	1	3
hsa-miR-423-5p	MIMAT0004748	ENSG00000233937	ENST00000511331	CTC-338M12.4-004	CTC-338M12.4	1	0	1	1	3
hsa-miR-423-5p	MIMAT0004748	ENSG00000259410	ENST00000560577	RP11-34F13.3-002	RP11-34F13.3	1	0	1	1	3
hsa-miR-423-5p	MIMAT0004748	ENSG00000249175	ENST00000513849	CTC-484P3.3-001	CTC-484P3.3	1	0	1	1	3
hsa-miR-423-5p	MIMAT0004748	ENSG00000279366	ENST00000625002	RP11-380M21.3-001	RP11-380M21.3	1	0	1	1	3
hsa-miR-423-5p	MIMAT0004748	ENSG00000226490	ENST00000427937	AC138647.1-001	AC138647.1	1	0	1	1	3
hsa-miR-423-5p	MIMAT0004748	ENSG00000234869	ENST00000426112	RP3-439F8.1-001	RP3-439F8.1	1	0	1	1	3
hsa-miR-423-5p	MIMAT0004748	ENSG00000251450	ENST00000505107	RASGRF2-AS1-002	RASGRF2-AS1	1	0	1	1	3
hsa-miR-423-5p	MIMAT0004748	ENSG00000260093	ENST00000562143	RP11-1E4.1-001	RP11-1E4.1	1	0	1	1	3
hsa-miR-423-5p	MIMAT0004748	ENSG00000276462	ENST00000620833	BX255923.3-001	BX255923.3	1	0	1	1	3
hsa-miR-423-5p	MIMAT0004748	ENSG00000250033	ENST00000510767	SLC7A11-AS1-001	SLC7A11-AS1	1	0	1	1	3
hsa-miR-423-5p	MIMAT0004748	ENSG00000264790	ENST00000584547	RP11-26N15.2-001	RP11-26N15.2	1	0	1	1	3
hsa-miR-423-5p	MIMAT0004748	ENSG00000255847	ENST00000537019	RP11-167N4.2-201	RP11-167N4.2	1	0	1	1	3
hsa-miR-423-5p	MIMAT0004748	ENSG00000268496	ENST00000596631	CTD-2587H19.2-001	CTD-2587H19.2	1	0	1	1	3
hsa-miR-423-5p	MIMAT0004748	ENSG00000278908	ENST00000623248	RP11-523J2.1-001	RP11-523J2.1	1	0	1	1	3
hsa-miR-423-5p	MIMAT0004748	ENSG00000225792	ENST00000451264	AC004540.4-002	AC004540.4	1	0	1	1	3
hsa-miR-423-5p	MIMAT0004748	ENSG00000272944	ENST00000609776	CTD-2308L22.1-001	CTD-2308L22.1	1	0	1	1	3
hsa-miR-423-5p	MIMAT0004748	ENSG00000254349	ENST00000518190	FLJ39080-004	FLJ39080	1	0	1	1	3
hsa-miR-423-5p	MIMAT0004748	ENSG00000261526	ENST00000565797	CTB-31O20.2-001	CTB-31O20.2	1	0	1	1	3
hsa-miR-423-5p	MIMAT0004748	ENSG00000270168	ENST00000573315	LA16c-380H5.4-001	LA16c-380H5.4	1	0	1	1	3
hsa-miR-423-5p	MIMAT0004748	ENSG00000236151	ENST00000457224	RP5-1100I6.1-001	RP5-1100I6.1	1	0	1	1	3
hsa-miR-423-5p	MIMAT0004748	ENSG00000249395	ENST00000523313	CASC9-004	CASC9	1	0	1	1	3
hsa-miR-423-5p	MIMAT0004748	ENSG00000221845	ENST00000408988	C7orf65-001	C7orf65	1	0	1	1	3
hsa-miR-423-5p	MIMAT0004748	ENSG00000247081	ENST00000519801	BAALC-AS1-007	BAALC-AS1	1	0	1	1	3
hsa-miR-423-5p	MIMAT0004748	ENSG00000233553	ENST00000457467	AC108462.1-001	AC108462.1	1	0	1	1	3
hsa-miR-423-5p	MIMAT0004748	ENSG00000261009	ENST00000565415	RP11-1437A8.5-002	RP11-1437A8.5	1	0	1	1	3
hsa-miR-423-5p	MIMAT0004748	ENSG00000235652	ENST00000627375	RP11-545I5.3-007	RP11-545I5.3	1	0	1	1	3
hsa-miR-423-5p	MIMAT0004748	ENSG00000265451	ENST00000577914	RP11-204L24.2-001	RP11-204L24.2	1	0	1	1	3
hsa-miR-423-5p	MIMAT0004748	ENSG00000226031	ENST00000446383	FGF13-AS1-002	FGF13-AS1	1	0	1	1	3
hsa-miR-423-5p	MIMAT0004748	ENSG00000232265	ENST00000597931	XXyac-YX155B6.5-006	XXyac-YX155B6.5	1	0	1	1	3
hsa-miR-423-5p	MIMAT0004748	ENSG00000249669	ENST00000505340	MIR143HG-004	MIR143HG	1	0	1	1	3
hsa-miR-423-5p	MIMAT0004748	ENSG00000223522	ENST00000418963	AC093690.1-001	AC093690.1	1	0	1	1	3
hsa-miR-423-5p	MIMAT0004748	ENSG00000237001	ENST00000413063	WASF3-AS1-001	WASF3-AS1	1	0	1	1	3
hsa-miR-423-5p	MIMAT0004748	ENSG00000174365	ENST00000440918	SNHG11-012	SNHG11	1	0	1	1	3
hsa-miR-423-5p	MIMAT0004748	ENSG00000235021	ENST00000442712	RP11-439E19.7-001	RP11-439E19.7	1	0	1	1	3
hsa-miR-423-5p	MIMAT0004748	ENSG00000280351	ENST00000625110	CTD-2561B21.8-001	CTD-2561B21.8	1	0	1	1	3
hsa-miR-423-5p	MIMAT0004748	ENSG00000229619	ENST00000445466	MBNL1-AS1-002	MBNL1-AS1	1	0	1	1	3
hsa-miR-423-5p	MIMAT0004748	ENSG00000254774	ENST00000527922	RP11-148O21.3-001	RP11-148O21.3	1	0	1	1	3
hsa-miR-423-5p	MIMAT0004748	ENSG00000261971	ENST00000573130	MMP25-AS1-003	MMP25-AS1	1	0	1	1	3
hsa-miR-423-5p	MIMAT0004748	ENSG00000279873	ENST00000623515	LINC01126-001	LINC01126	1	0	1	1	3
hsa-miR-423-5p	MIMAT0004748	ENSG00000245694	ENST00000560208	CRNDE-006	CRNDE	1	0	1	1	3
hsa-miR-423-5p	MIMAT0004748	ENSG00000228878	ENST00000437235	SEPT7-AS1-002	SEPT7-AS1	1	0	1	1	3
hsa-miR-423-5p	MIMAT0004748	ENSG00000255571	ENST00000546186	LINC00925-002	LINC00925	1	0	1	1	3
hsa-miR-423-5p	MIMAT0004748	ENSG00000227640	ENST00000438290	SOX21-AS1-001	SOX21-AS1	1	0	1	1	3
hsa-miR-423-5p	MIMAT0004748	ENSG00000231898	ENST00000625454	AC012594.1-052	AC012594.1	1	0	1	1	3
hsa-miR-423-5p	MIMAT0004748	ENSG00000224655	ENST00000435895	AC018737.3-002	AC018737.3	1	0	1	1	3
hsa-miR-423-5p	MIMAT0004748	ENSG00000249201	ENST00000512572	CTD-3080P12.3-002	CTD-3080P12.3	1	0	1	1	3
hsa-miR-423-5p	MIMAT0004748	ENSG00000279390	ENST00000623352	AF127577.13-001	AF127577.13	1	0	1	1	3
hsa-miR-423-5p	MIMAT0004748	ENSG00000262580	ENST00000570309	RP11-334C17.5-005	RP11-334C17.5	1	0	1	1	3
hsa-miR-423-5p	MIMAT0004748	ENSG00000215498	ENST00000446717	FAM230B-005	FAM230B	1	0	1	1	3
hsa-miR-423-5p	MIMAT0004748	ENSG00000276524	ENST00000621974	RP11-323F24.3-001	RP11-323F24.3	1	0	1	1	3
hsa-miR-423-5p	MIMAT0004748	ENSG00000250056	ENST00000505626	LINC01018-001	LINC01018	1	0	1	1	3
hsa-miR-423-5p	MIMAT0004748	ENSG00000253616	ENST00000523806	RP11-875O11.3-001	RP11-875O11.3	1	0	1	1	3
hsa-miR-423-5p	MIMAT0004748	ENSG00000254369	ENST00000518947	HOXA-AS3-001	HOXA-AS3	1	0	1	1	3
hsa-miR-423-5p	MIMAT0004748	ENSG00000206142	ENST00000447720	KB-1183D5.13-001	KB-1183D5.13	1	0	1	1	3
hsa-miR-423-5p	MIMAT0004748	ENSG00000228549	ENST00000438002	RP11-108M9.3-001	RP11-108M9.3	1	0	1	1	3
hsa-miR-423-5p	MIMAT0004748	ENSG00000277192	ENST00000612967	RP11-89G4.1-001	RP11-89G4.1	1	0	1	1	3
hsa-miR-423-5p	MIMAT0004748	ENSG00000231711	ENST00000421538	LINC00899-001	LINC00899	1	0	1	1	3
hsa-miR-423-5p	MIMAT0004748	ENSG00000253798	ENST00000522076	AC008694.3-001	AC008694.3	1	0	1	1	3
hsa-miR-423-5p	MIMAT0004748	ENSG00000248690	ENST00000514180	HAS2-AS1-001	HAS2-AS1	1	0	1	1	3
hsa-miR-423-5p	MIMAT0004748	ENSG00000259772	ENST00000558388	RP11-16E12.2-001	RP11-16E12.2	1	0	1	1	3
hsa-miR-423-5p	MIMAT0004748	ENSG00000249673	ENST00000515194	NOP14-AS1-008	NOP14-AS1	1	0	1	1	3
hsa-miR-423-5p	MIMAT0004748	ENSG00000231074	ENST00000602861	HCG18-018	HCG18	1	0	1	1	3
hsa-miR-423-5p	MIMAT0004748	ENSG00000260517	ENST00000620513	RP11-426C22.5-003	RP11-426C22.5	1	0	1	1	3
hsa-miR-423-5p	MIMAT0004748	ENSG00000279233	ENST00000623804	RP11-158L12.4-001	RP11-158L12.4	1	0	1	1	3
hsa-miR-423-5p	MIMAT0004748	ENSG00000251322	ENST00000445220	SHANK3-202	SHANK3	1	0	1	1	3
hsa-miR-423-5p	MIMAT0004748	ENSG00000228274	ENST00000412067	RP3-508I15.9-002	RP3-508I15.9	1	0	1	1	3
hsa-miR-423-5p	MIMAT0004748	ENSG00000236499	ENST00000609602	LINC00896-001	LINC00896	1	0	1	1	3
hsa-miR-423-5p	MIMAT0004748	ENSG00000267272	ENST00000490006	LINC01140-001	LINC01140	1	0	1	1	3
hsa-miR-423-5p	MIMAT0004748	ENSG00000275936	ENST00000617183	RP1-278C19.8-001	RP1-278C19.8	1	0	1	1	3
hsa-miR-423-5p	MIMAT0004748	ENSG00000260698	ENST00000570141	RP11-439E19.9-001	RP11-439E19.9	1	0	1	1	3
hsa-miR-423-5p	MIMAT0004748	ENSG00000225655	ENST00000613309	PGM5-AS1-001	PGM5-AS1	1	0	1	1	3
hsa-miR-423-5p	MIMAT0004748	ENSG00000229921	ENST00000456585	KIF25-AS1-002	KIF25-AS1	1	0	1	1	3
hsa-miR-423-5p	MIMAT0004748	ENSG00000269994	ENST00000602579	RP11-276H19.2-001	RP11-276H19.2	1	0	1	1	3
hsa-miR-423-5p	MIMAT0004748	ENSG00000262681	ENST00000577087	RP11-311F12.1-001	RP11-311F12.1	1	0	1	1	3
hsa-miR-423-5p	MIMAT0004748	ENSG00000276649	ENST00000619200	RP5-858L17.1-001	RP5-858L17.1	1	0	1	1	3
hsa-miR-423-5p	MIMAT0004748	ENSG00000125804	ENST00000471057	FAM182A-003	FAM182A	1	0	1	1	3
hsa-miR-423-5p	MIMAT0004748	ENSG00000231528	ENST00000453010	FAM225A-001	FAM225A	1	0	1	1	3
hsa-miR-423-5p	MIMAT0004748	ENSG00000255929	ENST00000537874	RP11-867G2.8-002	RP11-867G2.8	1	0	1	1	3
hsa-miR-423-5p	MIMAT0004748	ENSG00000264982	ENST00000579580	RP11-344B2.2-001	RP11-344B2.2	1	0	1	1	3
hsa-miR-423-5p	MIMAT0004748	ENSG00000273004	ENST00000609881	GS1-279B7.2-001	GS1-279B7.2	1	0	1	1	3
hsa-miR-423-5p	MIMAT0004748	ENSG00000281649	ENST00000625445	EBLN3-001	EBLN3	1	0	1	1	3
hsa-miR-423-5p	MIMAT0004748	ENSG00000279585	ENST00000625029	GS1-115M3.3-001	GS1-115M3.3	1	0	1	1	3
hsa-miR-423-5p	MIMAT0004748	ENSG00000244479	ENST00000498397	OR2A1-AS1-017	OR2A1-AS1	1	0	1	1	3
hsa-miR-423-5p	MIMAT0004748	ENSG00000267030	ENST00000588798	CTB-50L17.7-001	CTB-50L17.7	1	0	1	1	3
hsa-miR-423-5p	MIMAT0004748	ENSG00000274628	ENST00000617589	FAM95B1-005	FAM95B1	1	0	1	1	3
hsa-miR-423-5p	MIMAT0004748	ENSG00000232850	ENST00000443493	PTGES2-AS1-001	PTGES2-AS1	1	0	1	1	3
hsa-miR-423-5p	MIMAT0004748	ENSG00000249476	ENST00000512693	CTD-2587M2.1-001	CTD-2587M2.1	1	0	1	1	3
hsa-miR-423-5p	MIMAT0004748	ENSG00000260343	ENST00000565936	LINC01043-001	LINC01043	1	0	1	1	3
hsa-miR-423-5p	MIMAT0004748	ENSG00000230852	ENST00000444796	RP11-51G5.1-001	RP11-51G5.1	1	0	1	1	3
hsa-miR-423-5p	MIMAT0004748	ENSG00000261051	ENST00000567714	RP11-274H2.5-001	RP11-274H2.5	1	0	1	1	3
hsa-miR-423-5p	MIMAT0004748	ENSG00000224189	ENST00000416928	HAGLR-001	HAGLR	1	0	1	1	3
hsa-miR-423-5p	MIMAT0004748	ENSG00000269210	ENST00000601251	RP11-173C1.1-001	RP11-173C1.1	1	0	1	1	3
hsa-miR-423-5p	MIMAT0004748	ENSG00000253320	ENST00000519257	KB-1507C5.2-008	KB-1507C5.2	1	0	1	1	3
hsa-miR-423-5p	MIMAT0004748	ENSG00000258695	ENST00000555972	RP3-414A15.2-001	RP3-414A15.2	1	0	1	1	3
hsa-miR-423-5p	MIMAT0004748	ENSG00000183250	ENST00000615847	LINC01547-201	LINC01547	1	0	1	1	3
hsa-miR-423-5p	MIMAT0004748	ENSG00000232995	ENST00000526176	RGS5-008	RGS5	1	0	1	1	3
hsa-miR-423-5p	MIMAT0004748	ENSG00000260550	ENST00000561676	RP11-457I16.2-001	RP11-457I16.2	1	0	1	1	3
hsa-miR-423-5p	MIMAT0004748	ENSG00000277870	ENST00000624459	FAM230A-001	FAM230A	1	0	1	1	3
hsa-miR-423-5p	MIMAT0004748	ENSG00000250590	ENST00000515660	RP11-565A3.2-002	RP11-565A3.2	1	0	1	1	3
hsa-miR-423-5p	MIMAT0004748	ENSG00000272593	ENST00000609303	RP11-339B21.11-001	RP11-339B21.11	1	0	1	1	3
hsa-miR-423-5p	MIMAT0004748	ENSG00000247828	ENST00000504636	TMEM161B-AS1-006	TMEM161B-AS1	1	0	1	1	3
hsa-miR-423-5p	MIMAT0004748	ENSG00000259319	ENST00000560419	RP11-293M10.6-002	RP11-293M10.6	1	0	1	1	3
hsa-miR-423-5p	MIMAT0004748	ENSG00000261222	ENST00000581412	CTD-2006K23.1-002	CTD-2006K23.1	1	0	1	1	3
hsa-miR-423-5p	MIMAT0004748	ENSG00000269737	ENST00000596308	RP11-345P4.7-001	RP11-345P4.7	1	0	1	1	3
hsa-miR-423-5p	MIMAT0004748	ENSG00000279255	ENST00000623057	LA16c-380A1.2-001	LA16c-380A1.2	1	0	1	1	3
hsa-miR-423-5p	MIMAT0004748	ENSG00000204685	ENST00000432267	STARD7-AS1-002	STARD7-AS1	1	0	1	1	3
hsa-miR-423-5p	MIMAT0004748	ENSG00000215039	ENST00000535639	CD27-AS1-001	CD27-AS1	1	0	1	1	3
hsa-miR-423-5p	MIMAT0004748	ENSG00000177640	ENST00000435944	CASC2-001	CASC2	1	0	1	1	3
hsa-miR-423-5p	MIMAT0004748	ENSG00000226950	ENST00000411630	DANCR-001	DANCR	1	0	1	1	3
hsa-miR-423-5p	MIMAT0004748	ENSG00000225684	ENST00000439875	FAM225B-002	FAM225B	1	0	1	1	3
hsa-miR-423-5p	MIMAT0004748	ENSG00000250814	ENST00000508097	RP11-447B18.1-001	RP11-447B18.1	1	0	1	1	3
hsa-miR-423-5p	MIMAT0004748	ENSG00000179818	ENST00000598586	PCBP1-AS1-056	PCBP1-AS1	1	0	1	1	3
hsa-miR-423-5p	MIMAT0004748	ENSG00000129816	ENST00000250776	TTTY1B-001	TTTY1B	1	0	1	1	3
hsa-miR-423-5p	MIMAT0004748	ENSG00000260910	ENST00000562710	LINC00565-001	LINC00565	1	0	1	1	3
hsa-miR-423-5p	MIMAT0004748	ENSG00000278961	ENST00000624951	CH507-396I9.3-001	CH507-396I9.3	1	0	1	1	3
hsa-miR-423-5p	MIMAT0004748	ENSG00000281706	ENST00000629732	LINC01012-001	LINC01012	1	0	1	1	3
hsa-miR-423-5p	MIMAT0004748	ENSG00000259658	ENST00000558592	RP11-89K11.1-001	RP11-89K11.1	1	0	1	1	3
hsa-miR-423-5p	MIMAT0004748	ENSG00000270571	ENST00000604271	RP11-355F16.1-001	RP11-355F16.1	1	0	1	1	3
hsa-miR-423-5p	MIMAT0004748	ENSG00000232079	ENST00000609782	AL035610.1-005	AL035610.1	1	0	1	1	3
hsa-miR-423-5p	MIMAT0004748	ENSG00000168367	ENST00000598994	LINC00917-007	LINC00917	1	0	1	1	3
hsa-miR-423-5p	MIMAT0004748	ENSG00000261068	ENST00000562471	RP11-7K24.3-001	RP11-7K24.3	1	0	1	1	3
hsa-miR-423-5p	MIMAT0004748	ENSG00000254614	ENST00000528551	AP003068.23-002	AP003068.23	1	0	1	1	3
hsa-miR-423-5p	MIMAT0004748	ENSG00000245468	ENST00000501888	RP11-367J11.3-003	RP11-367J11.3	1	0	1	1	3
hsa-miR-423-5p	MIMAT0004748	ENSG00000175147	ENST00000404665	TMEM51-AS1-002	TMEM51-AS1	1	0	1	1	3
hsa-miR-423-5p	MIMAT0004748	ENSG00000241525	ENST00000599026	AC108004.3-002	AC108004.3	1	0	1	1	3
hsa-miR-423-5p	MIMAT0004748	ENSG00000272631	ENST00000608826	RP11-359E3.4-001	RP11-359E3.4	1	0	1	1	3
hsa-miR-423-5p	MIMAT0004748	ENSG00000280407	ENST00000624920	RP13-516M14.8-001	RP13-516M14.8	1	0	1	1	3
hsa-miR-423-5p	MIMAT0004748	ENSG00000227482	ENST00000428292	RP11-18B16.2-001	RP11-18B16.2	1	0	1	1	3
hsa-miR-423-5p	MIMAT0004748	ENSG00000256925	ENST00000366099	GPR123-AS1-002	GPR123-AS1	1	0	1	1	3
hsa-miR-423-5p	MIMAT0004748	ENSG00000249035	ENST00000518905	CTB-113P19.1-002	CTB-113P19.1	1	0	1	1	3
hsa-miR-423-5p	MIMAT0004748	ENSG00000279281	ENST00000623054	RP11-226M10.3-001	RP11-226M10.3	1	0	1	1	3
hsa-miR-423-5p	MIMAT0004748	ENSG00000230487	ENST00000533935	PSMG3-AS1-004	PSMG3-AS1	1	0	1	1	3
hsa-miR-423-5p	MIMAT0004748	ENSG00000187621	ENST00000484207	TCL6-005	TCL6	1	0	1	1	3
hsa-miR-423-5p	MIMAT0004748	ENSG00000228956	ENST00000625533	SATB1-AS1-047	SATB1-AS1	1	0	1	1	3
hsa-miR-423-5p	MIMAT0004748	ENSG00000233183	ENST00000530000	RP3-468B3.2-003	RP3-468B3.2	1	0	1	1	3
hsa-miR-423-5p	MIMAT0004748	ENSG00000248307	ENST00000514600	LINC00616-001	LINC00616	1	0	1	1	3
hsa-miR-423-5p	MIMAT0004748	ENSG00000268189	ENST00000597549	AC005785.2-002	AC005785.2	1	0	1	1	3
hsa-miR-423-5p	MIMAT0004748	ENSG00000246528	ENST00000530194	RP11-159H10.3-001	RP11-159H10.3	1	0	1	1	3
hsa-miR-423-5p	MIMAT0004748	ENSG00000196421	ENST00000358393	LINC00176-003	LINC00176	1	0	1	1	3
hsa-miR-423-5p	MIMAT0004748	ENSG00000228021	ENST00000596068	RP11-383C5.3-003	RP11-383C5.3	1	0	1	1	3
hsa-miR-423-5p	MIMAT0004748	ENSG00000254451	ENST00000548779	RP11-560G2.1-001	RP11-560G2.1	1	0	1	1	3
hsa-miR-423-5p	MIMAT0004748	ENSG00000232098	ENST00000593393	CTD-2619J13.14-001	CTD-2619J13.14	1	0	1	1	3
hsa-miR-423-5p	MIMAT0004748	ENSG00000180846	ENST00000586395	CSNK1G2-AS1-001	CSNK1G2-AS1	1	0	1	1	3
hsa-miR-423-5p	MIMAT0004748	ENSG00000223387	ENST00000418839	RP11-408H1.3-001	RP11-408H1.3	1	0	1	1	3
hsa-miR-423-5p	MIMAT0004748	ENSG00000260391	ENST00000568966	RP11-71H17.7-001	RP11-71H17.7	1	0	1	1	3
hsa-miR-423-5p	MIMAT0004748	ENSG00000261095	ENST00000566092	RP11-899L11.1-001	RP11-899L11.1	1	0	1	1	3
hsa-miR-423-5p	MIMAT0004748	ENSG00000248767	ENST00000510017	WI2-2373I1.2-001	WI2-2373I1.2	1	0	1	1	3
hsa-miR-423-5p	MIMAT0004748	ENSG00000258729	ENST00000623367	RP11-404P21.6-201	RP11-404P21.6	1	0	1	1	3
hsa-miR-423-5p	MIMAT0004748	ENSG00000249717	ENST00000508031	RP11-44F21.3-001	RP11-44F21.3	1	0	1	1	3
hsa-miR-423-5p	MIMAT0004748	ENSG00000267769	ENST00000592034	CTB-50L17.9-001	CTB-50L17.9	1	0	1	1	3
hsa-miR-423-5p	MIMAT0004748	ENSG00000231160	ENST00000436901	KLF3-AS1-006	KLF3-AS1	1	0	1	1	3
hsa-miR-423-5p	MIMAT0004748	ENSG00000248019	ENST00000500765	FAM13A-AS1-002	FAM13A-AS1	1	0	1	1	3
hsa-miR-423-5p	MIMAT0004748	ENSG00000229750	ENST00000449168	AC096649.2-001	AC096649.2	1	0	1	1	3
hsa-miR-423-5p	MIMAT0004748	ENSG00000226416	ENST00000419080	MRPL23-AS1-001	MRPL23-AS1	1	0	1	1	3
hsa-miR-423-5p	MIMAT0004748	ENSG00000258135	ENST00000550636	RP11-70F11.11-001	RP11-70F11.11	1	0	1	1	3
hsa-miR-423-5p	MIMAT0004748	ENSG00000188280	ENST00000617303	FAM230A-003	FAM230A	1	0	1	1	3
hsa-miR-423-5p	MIMAT0004748	ENSG00000225746	ENST00000434716	SNHG23-001	SNHG23	1	0	1	1	3
hsa-miR-423-5p	MIMAT0004748	ENSG00000235303	ENST00000413005	RP1-79C4.1-001	RP1-79C4.1	1	0	1	1	3
hsa-miR-423-5p	MIMAT0004748	ENSG00000227764	ENST00000412871	RP11-354K1.1-001	RP11-354K1.1	1	0	1	1	3
hsa-miR-423-5p	MIMAT0004748	ENSG00000261451	ENST00000562242	RP11-981G7.1-001	RP11-981G7.1	1	0	1	1	3
hsa-miR-423-5p	MIMAT0004748	ENSG00000236081	ENST00000415399	ELFN1-AS1-002	ELFN1-AS1	1	0	1	1	3
hsa-miR-423-5p	MIMAT0004748	ENSG00000132832	ENST00000415889	LINC01260-002	LINC01260	1	0	1	1	3
hsa-miR-423-5p	MIMAT0004748	ENSG00000262884	ENST00000574885	CTD-3060P21.1-001	CTD-3060P21.1	1	0	1	1	3
hsa-miR-423-5p	MIMAT0004748	ENSG00000259081	ENST00000556368	RP11-488C13.6-001	RP11-488C13.6	1	0	1	1	3
hsa-miR-423-5p	MIMAT0004748	ENSG00000196668	ENST00000480237	LINC00173-002	LINC00173	1	0	1	1	3
hsa-miR-423-5p	MIMAT0004748	ENSG00000235563	ENST00000439621	RP11-334A14.8-001	RP11-334A14.8	1	0	1	1	3
hsa-miR-423-5p	MIMAT0004748	ENSG00000273066	ENST00000415992	RP11-216L13.19-001	RP11-216L13.19	1	0	1	1	3
hsa-miR-423-5p	MIMAT0004748	ENSG00000225945	ENST00000415890	RP3-441A12.1-001	RP3-441A12.1	1	0	1	1	3
hsa-miR-423-5p	MIMAT0004748	ENSG00000230113	ENST00000442757	AC091177.1-001	AC091177.1	1	0	1	1	3
hsa-miR-423-5p	MIMAT0004748	ENSG00000251015	ENST00000506633	SLC25A30-AS1-001	SLC25A30-AS1	1	0	1	1	3
hsa-miR-423-5p	MIMAT0004748	ENSG00000257582	ENST00000548010	LINC01475-001	LINC01475	1	0	1	1	3
hsa-miR-423-5p	MIMAT0004748	ENSG00000267610	ENST00000588095	AC007787.2-001	AC007787.2	1	0	1	1	3
hsa-miR-423-5p	MIMAT0004748	ENSG00000250397	ENST00000506172	RP11-1391J7.1-001	RP11-1391J7.1	1	0	1	1	3
hsa-miR-423-5p	MIMAT0004748	ENSG00000265843	ENST00000578833	LINC01029-004	LINC01029	1	0	1	1	3
hsa-miR-423-5p	MIMAT0004748	ENSG00000224272	ENST00000413820	AC114730.3-002	AC114730.3	1	0	1	1	3
hsa-miR-423-5p	MIMAT0004748	ENSG00000261118	ENST00000565623	RP11-104N10.1-001	RP11-104N10.1	1	0	1	1	3
hsa-miR-423-5p	MIMAT0004748	ENSG00000226239	ENST00000449519	RP1-310O13.7-001	RP1-310O13.7	1	0	1	1	3
hsa-miR-423-5p	MIMAT0004748	ENSG00000257860	ENST00000549568	RP11-552I14.1-003	RP11-552I14.1	1	0	1	1	3
hsa-miR-423-5p	MIMAT0004748	ENSG00000230393	ENST00000434301	AC092667.2-001	AC092667.2	1	0	1	1	3
hsa-miR-423-5p	MIMAT0004748	ENSG00000279803	ENST00000624886	RP11-407G23.5-001	RP11-407G23.5	1	0	1	1	3
hsa-miR-423-5p	MIMAT0004748	ENSG00000275542	ENST00000622907	RP11-455O6.9-001	RP11-455O6.9	1	0	1	1	3
hsa-miR-423-5p	MIMAT0004748	ENSG00000223704	ENST00000434868	LINC01422-001	LINC01422	1	0	1	1	3
hsa-miR-423-5p	MIMAT0004748	ENSG00000237094	ENST00000440038	RP4-669L17.10-003	RP4-669L17.10	1	0	1	1	3
hsa-miR-423-5p	MIMAT0004748	ENSG00000248092	ENST00000503484	NNT-AS1-001	NNT-AS1	1	0	1	1	3
hsa-miR-423-5p	MIMAT0004748	ENSG00000259363	ENST00000559714	CTD-2054N24.2-001	CTD-2054N24.2	1	0	1	1	3
hsa-miR-423-5p	MIMAT0004748	ENSG00000234777	ENST00000429657	RP11-125D12.2-001	RP11-125D12.2	1	0	1	1	3
hsa-miR-423-5p	MIMAT0004748	ENSG00000240093	ENST00000467050	AC093627.12-001	AC093627.12	1	0	1	1	3
hsa-miR-423-5p	MIMAT0004748	ENSG00000279993	ENST00000623434	RP11-76C10.3-001	RP11-76C10.3	1	0	1	1	3
hsa-miR-423-5p	MIMAT0004748	ENSG00000179082	ENST00000316786	C9orf106-001	C9orf106	1	0	1	1	3
hsa-miR-423-5p	MIMAT0004748	ENSG00000227007	ENST00000448901	LINC01247-001	LINC01247	1	0	1	1	3
hsa-miR-423-5p	MIMAT0004748	ENSG00000246090	ENST00000499178	RP11-696N14.1-002	RP11-696N14.1	1	0	1	1	3
hsa-miR-423-5p	MIMAT0004748	ENSG00000188693	ENST00000453068	CYP51A1-AS1-001	CYP51A1-AS1	1	0	1	1	3
hsa-miR-423-5p	MIMAT0004748	ENSG00000237233	ENST00000389640	TMEM26-AS1-001	TMEM26-AS1	1	0	1	1	3
hsa-miR-423-5p	MIMAT0004748	ENSG00000278872	ENST00000625164	RP13-895J2.4-001	RP13-895J2.4	1	0	1	1	3
hsa-miR-423-5p	MIMAT0004748	ENSG00000281183	ENST00000628401	NPTN-IT1-001	NPTN-IT1	1	0	1	1	3
hsa-miR-423-5p	MIMAT0004748	ENSG00000266978	ENST00000592893	CTD-2369P2.5-001	CTD-2369P2.5	1	0	1	1	3
hsa-miR-423-5p	MIMAT0004748	ENSG00000224729	ENST00000442166	PCOLCE-AS1-001	PCOLCE-AS1	1	0	1	1	3
hsa-miR-423-5p	MIMAT0004748	ENSG00000279496	ENST00000624694	CTC-251I16.1-001	CTC-251I16.1	1	0	1	1	3
hsa-miR-423-5p	MIMAT0004748	ENSG00000274333	ENST00000624368	RP11-717F1.2-004	RP11-717F1.2	1	0	1	1	3
hsa-miR-423-5p	MIMAT0004748	ENSG00000230736	ENST00000420171	RP1-149A16.3-001	RP1-149A16.3	1	0	1	1	3
hsa-miR-423-5p	MIMAT0004748	ENSG00000227136	ENST00000461034	LINC00595-002	LINC00595	1	0	1	1	3
hsa-miR-423-5p	MIMAT0004748	ENSG00000224086	ENST00000458178	LL22NC03-86G7.1-001	LL22NC03-86G7.1	1	0	1	1	3
hsa-miR-423-5p	MIMAT0004748	ENSG00000196756	ENST00000449469	SNHG17-009	SNHG17	1	0	1	1	3
hsa-miR-423-5p	MIMAT0004748	ENSG00000225138	ENST00000606107	CTD-2228K2.7-002	CTD-2228K2.7	1	0	1	1	3
hsa-miR-423-5p	MIMAT0004748	ENSG00000250180	ENST00000502846	RP11-138A23.2-001	RP11-138A23.2	1	0	1	1	3
hsa-miR-423-5p	MIMAT0004748	ENSG00000268895	ENST00000595302	A1BG-AS1-001	A1BG-AS1	1	0	1	1	3
hsa-miR-423-5p	MIMAT0004748	ENSG00000267097	ENST00000592286	SLC14A2-AS1-005	SLC14A2-AS1	1	0	1	1	3
hsa-miR-423-5p	MIMAT0004748	ENSG00000238107	ENST00000427169	RP11-495P10.5-001	RP11-495P10.5	1	0	1	1	3
hsa-miR-423-5p	MIMAT0004748	ENSG00000182109	ENST00000331856	RP11-69E11.4-001	RP11-69E11.4	1	0	1	1	3
hsa-miR-423-5p	MIMAT0004748	ENSG00000280306	ENST00000624055	CTD-3076M17.1-001	CTD-3076M17.1	1	0	1	1	3
hsa-miR-423-5p	MIMAT0004748	ENSG00000204091	ENST00000373170	TDRG1-002	TDRG1	1	0	1	1	3
hsa-miR-423-5p	MIMAT0004748	ENSG00000233725	ENST00000423211	LINC00284-002	LINC00284	1	0	1	1	3
hsa-miR-423-5p	MIMAT0004748	ENSG00000279164	ENST00000623468	RP4-737E23.5-001	RP4-737E23.5	1	0	1	1	3
hsa-miR-423-5p	MIMAT0004748	ENSG00000273342	ENST00000609038	KB-1440D3.14-001	KB-1440D3.14	1	0	1	1	3
hsa-miR-423-5p	MIMAT0004748	ENSG00000254703	ENST00000526269	SENCR-001	SENCR	1	0	1	1	3
hsa-miR-423-5p	MIMAT0004748	ENSG00000260630	ENST00000563475	SNAI3-AS1-002	SNAI3-AS1	1	0	1	1	3
hsa-miR-423-5p	MIMAT0004748	ENSG00000280604	ENST00000626237	PCBP3-OT1-001	PCBP3-OT1	1	0	1	1	3
hsa-miR-423-5p	MIMAT0004748	ENSG00000227555	ENST00000426593	RP11-406A20.4-001	RP11-406A20.4	1	0	1	1	3
hsa-miR-423-5p	MIMAT0004748	ENSG00000276403	ENST00000622635	RP11-1151B14.1-001	RP11-1151B14.1	1	0	1	1	3
hsa-miR-423-5p	MIMAT0004748	ENSG00000271981	ENST00000607282	RP11-573G6.8-001	RP11-573G6.8	1	0	1	1	3
hsa-miR-423-5p	MIMAT0004748	ENSG00000278893	ENST00000624875	RP11-229O3.1-001	RP11-229O3.1	1	0	1	1	3
hsa-miR-423-5p	MIMAT0004748	ENSG00000227877	ENST00000600486	LINC00948-007	LINC00948	1	0	1	1	3
hsa-miR-423-5p	MIMAT0004748	ENSG00000254333	ENST00000519040	CTC-367J11.1-001	CTC-367J11.1	1	0	1	1	3
hsa-miR-423-5p	MIMAT0004748	ENSG00000281357	ENST00000625713	ARRDC3-AS1-001	ARRDC3-AS1	1	0	1	1	3
hsa-miR-423-5p	MIMAT0004748	ENSG00000254334	ENST00000519996	RP11-24P4.1-001	RP11-24P4.1	1	0	1	1	3
hsa-miR-423-5p	MIMAT0004748	ENSG00000266998	ENST00000588701	RP11-936I5.1-001	RP11-936I5.1	1	0	1	1	3
hsa-miR-423-5p	MIMAT0004748	ENSG00000224743	ENST00000590344	TEX26-AS1-017	TEX26-AS1	1	0	1	1	3
hsa-miR-423-5p	MIMAT0004748	ENSG00000257379	ENST00000547717	RP11-793H13.8-001	RP11-793H13.8	1	0	1	1	3
hsa-miR-423-5p	MIMAT0004748	ENSG00000236120	ENST00000422914	RP11-733O18.1-001	RP11-733O18.1	1	0	1	1	3
hsa-miR-423-5p	MIMAT0004748	ENSG00000280162	ENST00000624378	RP11-314N13.9-001	RP11-314N13.9	1	0	1	1	3
hsa-miR-423-5p	MIMAT0004748	ENSG00000256195	ENST00000534904	RP11-64D24.4-001	RP11-64D24.4	1	0	1	1	3
hsa-miR-423-5p	MIMAT0004748	ENSG00000260990	ENST00000569593	RP3-518E13.2-001	RP3-518E13.2	1	0	1	1	3
hsa-miR-423-5p	MIMAT0004748	ENSG00000268983	ENST00000593791	AC005253.4-001	AC005253.4	1	0	1	1	3
hsa-miR-423-5p	MIMAT0004748	ENSG00000259119	ENST00000554025	RP11-1127D7.1-001	RP11-1127D7.1	1	0	1	1	3
hsa-miR-423-5p	MIMAT0004748	ENSG00000225986	ENST00000442226	UBXN10-AS1-001	UBXN10-AS1	1	0	1	1	3
hsa-miR-423-5p	MIMAT0004748	ENSG00000242474	ENST00000480919	AC093627.9-002	AC093627.9	1	0	1	1	3
hsa-miR-423-5p	MIMAT0004748	ENSG00000236262	ENST00000429268	SHANK2-AS2-001	SHANK2-AS2	1	0	1	1	3
hsa-miR-423-5p	MIMAT0004748	ENSG00000231050	ENST00000412228	RP1-140A9.1-001	RP1-140A9.1	1	0	1	1	3
hsa-miR-423-5p	MIMAT0004748	ENSG00000245025	ENST00000502083	RP11-875O11.1-001	RP11-875O11.1	1	0	1	1	3
hsa-miR-423-5p	MIMAT0004748	ENSG00000182310	ENST00000572565	SPACA6P-003	SPACA6P	1	0	1	1	3
hsa-miR-423-5p	MIMAT0004748	ENSG00000260470	ENST00000564380	RP11-834C11.11-001	RP11-834C11.11	1	0	1	1	3
hsa-miR-423-5p	MIMAT0004748	ENSG00000267658	ENST00000586351	RP11-358B23.1-001	RP11-358B23.1	1	0	1	1	3
hsa-miR-423-5p	MIMAT0004748	ENSG00000173862	ENST00000311067	RP11-89N17.1-001	RP11-89N17.1	1	0	1	1	3
hsa-miR-423-5p	MIMAT0004748	ENSG00000272501	ENST00000606367	XXbac-BPG299F13.17-001	XXbac-BPG299F13.17	1	0	1	1	3
hsa-miR-423-5p	MIMAT0004748	ENSG00000280332	ENST00000623994	CTD-2013N17.6-001	CTD-2013N17.6	1	0	1	1	3
hsa-miR-423-5p	MIMAT0004748	ENSG00000204261	ENST00000412095	PSMB8-AS1-005	PSMB8-AS1	1	0	1	1	3
hsa-miR-423-5p	MIMAT0004748	ENSG00000226287	ENST00000436618	TMEM191A-002	TMEM191A	1	0	1	1	3
hsa-miR-423-5p	MIMAT0004748	ENSG00000235790	ENST00000608888	RP11-73M7.6-017	RP11-73M7.6	1	0	1	1	3
hsa-miR-423-5p	MIMAT0004748	ENSG00000254744	ENST00000528696	CTD-3076O17.1-001	CTD-3076O17.1	1	0	1	1	3
hsa-miR-423-5p	MIMAT0004748	ENSG00000267252	ENST00000587189	LINC01255-001	LINC01255	1	0	1	1	3
hsa-miR-423-5p	MIMAT0004748	ENSG00000236449	ENST00000442996	AC018890.6-002	AC018890.6	1	0	1	1	3
hsa-miR-423-5p	MIMAT0004748	ENSG00000228863	ENST00000443928	RP11-404F10.2-001	RP11-404F10.2	1	0	1	1	3
hsa-miR-423-5p	MIMAT0004748	ENSG00000255545	ENST00000528482	RP11-627G23.1-002	RP11-627G23.1	1	0	1	1	3
hsa-miR-423-5p	MIMAT0004748	ENSG00000260651	ENST00000563833	AF213884.2-001	AF213884.2	1	0	1	1	3
hsa-miR-423-5p	MIMAT0004748	ENSG00000267919	ENST00000597288	RP11-256I23.3-001	RP11-256I23.3	1	0	1	1	3
hsa-miR-423-5p	MIMAT0004748	ENSG00000177133	ENST00000321399	LINC00982-001	LINC00982	1	0	1	1	3
hsa-miR-423-5p	MIMAT0004748	ENSG00000278341	ENST00000616106	RP5-1142A6.10-001	RP5-1142A6.10	1	0	1	1	3
hsa-miR-423-5p	MIMAT0004748	ENSG00000229852	ENST00000441363	RP11-398K22.12-003	RP11-398K22.12	1	0	1	1	3
hsa-miR-423-5p	MIMAT0004748	ENSG00000227617	ENST00000425636	CERS6-AS1-001	CERS6-AS1	1	0	1	1	3
hsa-miR-423-5p	MIMAT0004748	ENSG00000224614	ENST00000458180	TNK2-AS1-001	TNK2-AS1	1	0	1	1	3
hsa-miR-423-5p	MIMAT0004748	ENSG00000258232	ENST00000550468	RP11-161H23.5-001	RP11-161H23.5	1	0	1	1	3
hsa-miR-423-5p	MIMAT0004748	ENSG00000215458	ENST00000400385	AATBC-002	AATBC	1	0	1	1	3
hsa-miR-423-5p	MIMAT0004748	ENSG00000267365	ENST00000590966	KCNJ2-AS1-001	KCNJ2-AS1	1	0	1	1	3
hsa-miR-423-5p	MIMAT0004748	ENSG00000272023	ENST00000607688	CTC-350I8.1-001	CTC-350I8.1	1	0	1	1	3
hsa-miR-423-5p	MIMAT0004748	ENSG00000231459	ENST00000425633	LINC00032-001	LINC00032	1	0	1	1	3
hsa-miR-423-5p	MIMAT0004748	ENSG00000264791	ENST00000577709	CTC-304I17.2-001	CTC-304I17.2	1	0	1	1	3
hsa-miR-423-5p	MIMAT0004748	ENSG00000281398	ENST00000507197	SNHG4-002	SNHG4	1	0	1	1	3
hsa-miR-423-5p	MIMAT0004748	ENSG00000236153	ENST00000428080	AC104076.3-001	AC104076.3	1	0	1	1	3
hsa-miR-423-5p	MIMAT0004748	ENSG00000260280	ENST00000564950	SLX1B-SULT1A4-003	SLX1B-SULT1A4	1	0	1	1	3
hsa-miR-423-5p	MIMAT0004748	ENSG00000261009	ENST00000570288	RP11-1437A8.5-001	RP11-1437A8.5	1	0	1	1	3
hsa-miR-423-5p	MIMAT0004748	ENSG00000213963	ENST00000456746	AC074286.1-002	AC074286.1	1	0	1	1	3
hsa-miR-423-5p	MIMAT0004748	ENSG00000232265	ENST00000599864	XXyac-YX155B6.5-005	XXyac-YX155B6.5	1	0	1	1	3
hsa-miR-423-5p	MIMAT0004748	ENSG00000238164	ENST00000416860	RP3-395M20.8-001	RP3-395M20.8	1	0	1	1	3
hsa-miR-423-5p	MIMAT0004748	ENSG00000231074	ENST00000412685	HCG18-001	HCG18	1	0	1	1	3
hsa-miR-423-5p	MIMAT0004748	ENSG00000241397	ENST00000497854	LINC00903-001	LINC00903	1	0	1	1	3
hsa-miR-423-5p	MIMAT0004748	ENSG00000272529	ENST00000606713	RP11-415F23.4-001	RP11-415F23.4	1	0	1	1	3
hsa-miR-423-5p	MIMAT0004748	ENSG00000204380	ENST00000629904	AC005042.4-003	AC005042.4	1	0	1	1	3
hsa-miR-423-5p	MIMAT0004748	ENSG00000259275	ENST00000558382	RP11-522B15.3-001	RP11-522B15.3	1	0	1	1	3
hsa-miR-423-5p	MIMAT0004748	ENSG00000266101	ENST00000579256	RP5-906A24.2-001	RP5-906A24.2	1	0	1	1	3
hsa-miR-423-5p	MIMAT0004748	ENSG00000224387	ENST00000424657	RP3-395M20.2-001	RP3-395M20.2	1	0	1	1	3
hsa-miR-423-5p	MIMAT0004748	ENSG00000229619	ENST00000608395	MBNL1-AS1-001	MBNL1-AS1	1	0	1	1	3
hsa-miR-423-5p	MIMAT0004748	ENSG00000235815	ENST00000436492	RP1-125N5.2-001	RP1-125N5.2	1	0	1	1	3
hsa-miR-423-5p	MIMAT0004748	ENSG00000232416	ENST00000418282	BPESC1-001	BPESC1	1	0	1	1	3
hsa-miR-423-5p	MIMAT0004748	ENSG00000255571	ENST00000558692	LINC00925-011	LINC00925	1	0	1	1	3
hsa-miR-423-5p	MIMAT0004748	ENSG00000226890	ENST00000415176	LA16c-395F10.1-001	LA16c-395F10.1	1	0	1	1	3
hsa-miR-423-5p	MIMAT0004748	ENSG00000224655	ENST00000438722	AC018737.3-003	AC018737.3	1	0	1	1	3
hsa-miR-423-5p	MIMAT0004748	ENSG00000249201	ENST00000514376	CTD-3080P12.3-003	CTD-3080P12.3	1	0	1	1	3
hsa-miR-423-5p	MIMAT0004748	ENSG00000279391	ENST00000623018	RP11-236J17.7-001	RP11-236J17.7	1	0	1	1	3
hsa-miR-423-5p	MIMAT0004748	ENSG00000262580	ENST00000572730	RP11-334C17.5-002	RP11-334C17.5	1	0	1	1	3
hsa-miR-423-5p	MIMAT0004748	ENSG00000215498	ENST00000451257	FAM230B-002	FAM230B	1	0	1	1	3
hsa-miR-423-5p	MIMAT0004748	ENSG00000228430	ENST00000585454	RP11-15B24.5-013	RP11-15B24.5	1	0	1	1	3
hsa-miR-423-5p	MIMAT0004748	ENSG00000250056	ENST00000507582	LINC01018-002	LINC01018	1	0	1	1	3
hsa-miR-423-5p	MIMAT0004748	ENSG00000272068	ENST00000606343	RP11-284F21.9-001	RP11-284F21.9	1	0	1	1	3
hsa-miR-423-5p	MIMAT0004748	ENSG00000280047	ENST00000622952	CTC-463A16.1-001	CTC-463A16.1	1	0	1	1	3
hsa-miR-423-5p	MIMAT0004748	ENSG00000227036	ENST00000578206	LINC00511-011	LINC00511	1	0	1	1	3
hsa-miR-423-5p	MIMAT0004748	ENSG00000254369	ENST00000521197	HOXA-AS3-004	HOXA-AS3	1	0	1	1	3
[truncated: 24,943 more rows]
