# Supplementary material for: Cross-platform genomic identification and clinical validation of breast cancer diagnostic biomarkers
Source: Aging (Albany NY). 2021 Jan 20;13(3):4258–73. doi: 10.18632/aging.202388 (PMC7906147; doi:10.18632/aging.202388)
Supplement: Supplementary Table 3 [file aging-13-202388-s004.xlsx]

## Sheet: aging-20-004249-s004
Supplementary Table 3. Differential gene expression in exosomes.
ncRNA	control	treat	log2(Fold_change)	p-value	q-value
ENST00000222396.5	6.82474	6.29591	-0.116359	0.736252	0.990729
ENST00000225973.5	5.75809	5.39232	-0.0946842	0.588929	0.990729
ENST00000230113.3	6.91531	6.79577	-0.0251564	0.86093	0.990789
ENST00000244906.6	6.46375	6.27943	-0.0417372	0.719126	0.990729
ENST00000246027.8	4.31676	4.35635	0.0131718	0.983434	0.996967
ENST00000253803.2	3.58582	4.61106	0.362795	0.481096	0.990729
ENST00000255183.4	8.84911	8.31161	-0.090404	0.631778	0.990729
ENST00000262354.4	3.29996	3.69341	0.162504	0.627656	0.990729
ENST00000281228.8	6.64114	7.10802	0.0980189	0.728805	0.990729
ENST00000289890.7	3.04096	2.84983	-0.0936522	0.739725	0.990729
ENST00000291374.7	5.21035	4.64085	-0.166991	0.267894	0.990729
ENST00000294715.2	22.5184	24.1535	0.101126	0.664605	0.990729
ENST00000295549.4	2.82927	4.54759	0.684672	0.0462643	0.990729
ENST00000303002.7	0.913138	0.447214	-1.02987	0.227318	0.990729
ENST00000304751.9	9.10553	9.75673	0.0996547	0.651564	0.990729
ENST00000305709.5	3.48274	6.42218	0.882838	5.17e-05	0.0495362
ENST00000306533.8	6.09632	6.99243	0.197856	0.74813	0.990789
ENST00000307533.6	5.15112	5.74627	0.15774	0.390383	0.990729
ENST00000308604.5	4.32636	4.47476	0.0486582	0.997658	0.999364
ENST00000309874.2	7.66812	7.08773	-0.11355	0.552083	0.990729
ENST00000314481.3	4.47307	5.78495	0.37104	0.146322	0.990729
ENST00000314957.3	7.49841	6.95966	-0.107568	0.535667	0.990729
ENST00000315293.2	8.48995	11.6972	0.462336	0.00102629	0.348678
ENST00000315302.2	6.31166	7.68662	0.284329	0.115969	0.990729
ENST00000316148.4	5.44026	5.86269	0.107887	0.662267	0.990729
ENST00000316807.2	3.31122	3.32256	0.00493347	0.975737	0.996332
ENST00000317122.1	4.98564	6.13385	0.299014	0.125247	0.990729
ENST00000317596.3	4.90081	4.66236	-0.0719613	0.738875	0.990729
ENST00000317726.4	7.27971	5.68621	-0.356413	0.119568	0.990729
ENST00000318291.4	5.44921	5.6098	0.0419035	0.766378	0.990789
ENST00000320322.2	3.20142	5.3045	0.728505	0.260387	0.990729
ENST00000320372.9	4.36934	4.99466	0.192973	0.448442	0.990729
ENST00000322227.2	5.13497	5.39799	0.0720665	0.717558	0.990729
ENST00000322353.3	6.52944	7.14367	0.129706	0.761573	0.990789
ENST00000323689.9	2.78807	4.35841	0.644538	0.423771	0.990729
ENST00000324348.7	4.9628	4.73528	-0.0677053	0.940396	0.990789
ENST00000324630.5	4.52919	4.10718	-0.141106	0.741235	0.990729
ENST00000325963.8	3.53299	4.38403	0.311368	0.106012	0.990729
ENST00000329536.8	24.5435	21.2647	-0.206879	0.395526	0.990729
ENST00000330602.2	5.29427	5.57193	0.0737454	0.763343	0.990789
ENST00000331096.2	7.415	6.43043	-0.205531	0.626583	0.990729
ENST00000331856.2	6.14672	6.79282	0.144193	0.45618	0.990729
ENST00000331944.6	5.11151	5.16692	0.0155522	0.89712	0.990789
ENST00000332468.4	9.14488	6.29061	-0.539763	0.0130766	0.877996
ENST00000332935.6	5.61701	9.33657	0.73309	0.0153307	0.928176
ENST00000333145.5	7.5168	5.85469	-0.360526	0.0417002	0.990729
ENST00000333482.4	3.11563	2.73386	-0.188583	0.616327	0.990729
ENST00000333487.2	4.43257	5.87627	0.406758	0.0462453	0.990729
ENST00000333854.2	8.70486	7.47131	-0.220459	0.294739	0.990729
ENST00000334165.4	7.13162	8.05929	0.176422	0.469902	0.990729
ENST00000335577.4	1.90356	2.17036	0.189237	0.911508	0.990789
ENST00000336905.3	0.951801	0.497186	-0.936874	0.130382	0.990729
ENST00000339037.3	11.6796	16.4235	0.491766	0.0160373	0.928176
ENST00000339092.2	5.49786	4.77775	-0.202538	0.200784	0.990729
ENST00000340301.5	5.88377	3.15395	-0.899582	0.0555222	0.990729
ENST00000340444.1	6.94315	6.69372	-0.0527821	0.541203	0.990729
ENST00000340585.6	7.21181	3.96966	-0.861348	0.0524969	0.990729
ENST00000340779.3	7.34586	7.76629	0.0802952	0.816286	0.990789
ENST00000342963.2	6.56433	7.0152	0.0958364	0.770381	0.990789
ENST00000342990.3	2.75638	7.35008	1.41498	0.054665	0.990729
ENST00000343087.4	3.86549	4.38935	0.183356	0.806759	0.990789
ENST00000343987.2	2.48987	3.4196	0.457754	0.163796	0.990729
ENST00000352271.6	5.357	6.47612	0.273706	0.518346	0.990729
ENST00000354425.4	6.14735	4.40608	-0.480468	0.244901	0.990729
ENST00000354432.3	7.33286	7.62279	0.0559451	0.849357	0.990789
ENST00000354527.2	4.04565	4.24601	0.069738	0.913822	0.990789
ENST00000354541.3	5.7633	5.34297	-0.109253	0.984718	0.996967
ENST00000354642.2	3.57094	4.66728	0.386277	0.464045	0.990729
ENST00000354756.3	4.36104	4.79519	0.136916	0.542963	0.990729
ENST00000354921.3	6.3857	5.75602	-0.149774	0.239608	0.990729
ENST00000355189.3	4.46014	4.90038	0.135805	0.804537	0.990789
ENST00000355500.1	5.5438	4.52712	-0.29228	0.119112	0.990729
ENST00000355837.4	5.23337	5.14803	-0.0237205	0.728622	0.990729
ENST00000355869.2	5.19994	7.07544	0.444323	0.194717	0.990729
ENST00000356047.3	52.2432	64.7657	0.309986	0.00372332	0.599128
ENST00000356499.2	6.73201	4.85308	-0.472135	0.241155	0.990729
ENST00000356672.3	8.53323	9.12415	0.0965978	0.593881	0.990729
ENST00000357045.4	5.34554	4.60759	-0.214324	0.635288	0.990729
ENST00000357671.6	6.25457	4.8256	-0.374204	0.337678	0.990729
ENST00000357876.5	0.790396	2.45704	1.63627	0.112358	0.990729
ENST00000358073.2	7.69268	8.1061	0.0755221	0.719915	0.990729
ENST00000358234.4	4.04654	4.14188	0.0335978	0.995358	0.999257
ENST00000358533.2	3.54031	3.00645	-0.235815	0.550798	0.990729
ENST00000359491.1	5.36603	5.27477	-0.0247469	0.983434	0.996967
ENST00000359760.5	3.70377	4.99649	0.431919	0.085453	0.990729
ENST00000359823.2	7.41733	4.42264	-0.745991	0.280065	0.990729
ENST00000359888.2	7.20979	7.24542	0.00711308	0.939625	0.990789
ENST00000360083.3	6.35968	5.18085	-0.295766	0.166858	0.990729
ENST00000360485.3	6.51002	6.09034	-0.0961397	0.742682	0.990729
ENST00000360528.2	4.33031	4.96502	0.197329	0.783732	0.990789
ENST00000360902.1	7.92751	7.48287	-0.0832756	0.560868	0.990729
ENST00000362077.4	3.37737	4.54196	0.427417	0.347886	0.990729
ENST00000366097.2	6.32963	5.40052	-0.229024	0.482375	0.990729
ENST00000366105.2	2.77251	4.41506	0.67124	0.346751	0.990729
ENST00000366109.2	6.03165	7.93792	0.396209	0.244481	0.990729
ENST00000366110.3	6.7964	7.65794	0.172186	0.611576	0.990729
ENST00000366134.2	6.27569	6.06625	-0.0489697	0.83237	0.990789
ENST00000366136.2	5.12577	5.07839	-0.0133983	0.913822	0.990789
ENST00000366140.2	3.68019	4.96781	0.432829	0.237258	0.990729
ENST00000366152.3	3.47729	4.33957	0.319589	0.518346	0.990729
ENST00000366153.2	2.60715	3.53994	0.441253	0.310193	0.990729
ENST00000366167.2	4.97912	3.90798	-0.349465	0.41996	0.990729
ENST00000366181.2	2.8855	2.76441	-0.0618523	0.640402	0.990729
ENST00000366185.2	5.6119	4.08339	-0.458722	0.115529	0.990729
ENST00000366187.2	4.5504	5.25314	0.207186	0.760668	0.990789
ENST00000366188.2	6.43382	3.43121	-0.906957	0.0804828	0.990729
ENST00000366189.3	3.62816	2.97608	-0.285824	0.600914	0.990729
ENST00000366209.2	5.09947	4.35482	-0.227734	0.548501	0.990729
ENST00000366218.2	2.92574	3.36208	0.200552	0.52937	0.990729
ENST00000366224.2	5.50239	5.15088	-0.0952388	0.743801	0.990729
ENST00000366253.2	2.35851	3.09248	0.39089	0.506004	0.990729
ENST00000366278.2	6.09335	4.36499	-0.481257	0.0510918	0.990729
ENST00000366287.4	4.84378	5.02912	0.0541711	0.850897	0.990789
ENST00000366321.2	7.84582	9.05305	0.206478	0.568328	0.990729
ENST00000366360.2	1.4346	2.11476	0.559847	0.441076	0.990729
ENST00000366365.2	7.1623	5.16453	-0.471787	0.112223	0.990729
ENST00000366376.2	8.18863	7.50003	-0.126725	0.947208	0.992716
ENST00000366397.3	4.61669	6.59505	0.514523	0.250848	0.990729
ENST00000366405.2	1.4409	2.49111	0.789825	0.20572	0.990729
ENST00000366424.2	9.62473	6.72502	-0.517206	0.0090623	0.826486
ENST00000366441.2	8.11945	4.12062	-0.97852	0.00253179	0.52894
ENST00000366527.3	3.17521	2.84826	-0.15677	0.351314	0.990729
ENST00000367716.3	5.67861	5.50958	-0.0435948	0.864501	0.990789
ENST00000369027.4	10.5884	7.54658	-0.488588	0.259653	0.990729
ENST00000369381.2	9.27704	11.8331	0.351092	4.39e-05	0.0474671
ENST00000369391.3	3.74632	3.1765	-0.238038	0.739725	0.990729
ENST00000369491.1	6.92766	6.00973	-0.205069	0.564552	0.990729
ENST00000369492.4	6.52535	6.19289	-0.0754436	0.948901	0.992716
ENST00000369843.3	6.74031	7.25758	0.106674	0.725101	0.990729
ENST00000369884.4	6.01248	6.24082	0.053776	0.913822	0.990789
ENST00000370292.3	5.44592	4.12677	-0.400164	0.276652	0.990729
ENST00000370438.2	5.9841	5.86472	-0.0290727	0.938089	0.990789
ENST00000371162.4	4.16048	4.89811	0.235475	0.387781	0.990729
ENST00000371169.1	6.80265	7.77041	0.191892	0.345757	0.990729
ENST00000371639.3	7.77106	6.2155	-0.322241	0.0777728	0.990729
ENST00000372490.3	6.35356	6.49725	0.0322646	0.798566	0.990789
ENST00000373226.2	3.44883	2.74481	-0.329403	0.469286	0.990729
ENST00000373384.4	6.02128	6.10753	0.0205194	0.921603	0.990789
ENST00000373604.4	5.1032	5.23412	0.0365441	0.823479	0.990789
ENST00000374922.4	2.88148	3.49899	0.280131	0.478486	0.990729
ENST00000375204.2	5.81067	5.5293	-0.0716077	0.659306	0.990729
ENST00000375206.2	7.15828	6.1629	-0.216003	0.0526687	0.990729
ENST00000375987.3	5.63113	5.56605	-0.0167719	0.714632	0.990729
ENST00000376445.3	4.42917	6.30189	0.508747	0.309119	0.990729
ENST00000376482.3	6.82822	3.38084	-1.01412	0.0641318	0.990729
ENST00000376593.2	5.0495	5.07794	0.00810139	0.835152	0.990789
ENST00000376617.3	10.0335	8.36047	-0.263177	0.134778	0.990729
ENST00000376797.3	3.43676	3.12969	-0.135032	0.512445	0.990729
ENST00000377300.3	5.43831	5.7139	0.0713174	0.717312	0.990729
ENST00000377469.1	6.5187	4.9505	-0.39701	0.00907703	0.826486
ENST00000377518.3	4.24547	3.27657	-0.37374	0.157506	0.990729
ENST00000377547.3	2.16242	2.80848	0.377146	0.554361	0.990729
ENST00000377977.3	5.89816	7.44808	0.336601	0.20404	0.990729
ENST00000378140.3	6.14384	4.66446	-0.397431	0.426675	0.990729
ENST00000378417.1	9.49339	8.20337	-0.210708	0.0926694	0.990729
ENST00000378432.1	8.58935	8.11438	-0.0820698	0.714632	0.990729
ENST00000378479.1	4.97053	5.26989	0.084376	0.770403	0.990789
ENST00000379317.1	5.14834	6.21112	0.270744	0.113398	0.990729
ENST00000379640.1	5.31947	4.74457	-0.165006	0.463841	0.990729
ENST00000379915.4	6.35897	6.20345	-0.0357229	0.878222	0.990789
ENST00000379928.4	4.35624	2.83313	-0.620685	0.375719	0.990729
ENST00000379963.1	6.77878	7.43476	0.13326	0.504479	0.990729
ENST00000380008.1	8.90531	7.88729	-0.175135	0.187735	0.990729
ENST00000380106.2	9.23623	7.93393	-0.219269	0.402178	0.990729
ENST00000380145.1	1.76116	3.26754	0.891682	0.00699491	0.773051
ENST00000380387.3	5.21806	5.05629	-0.0454343	0.802889	0.990789
ENST00000380601.2	5.39332	7.00837	0.377905	0.183436	0.990729
ENST00000380722.1	5.24834	5.74268	0.129862	0.561497	0.990729
ENST00000380981.2	9.77583	7.48238	-0.385721	0.00488162	0.670032
ENST00000381078.1	8.63832	8.38005	-0.0437906	0.761407	0.990789
ENST00000381105.2	1.80923	2.1521	0.25037	0.508197	0.990729
ENST00000381106.4	0.469523	1.03103	1.13482	0.310801	0.990729
ENST00000381108.3	0.206921	0.260377	0.331528	0.820066	0.990789
ENST00000381217.2	6.48574	6.5617	0.016799	0.92552	0.990789
ENST00000381475.3	0.676524	0.984586	0.541377	0.550033	0.990729
ENST00000381790.3	6.12661	5.43082	-0.17392	0.633517	0.990729
ENST00000382007.1	5.21267	4.89665	-0.0902275	0.558051	0.990729
ENST00000382426.3	6.7524	6.72431	-0.0060136	0.983742	0.996967
ENST00000382488.2	7.53412	6.87797	-0.131456	0.476307	0.990729
ENST00000382641.1	6.35966	5.54157	-0.198654	0.261408	0.990729
ENST00000382849.2	6.47191	6.45123	-0.00461673	0.98126	0.996735
ENST00000382897.2	4.5115	4.97837	0.142063	0.460832	0.990729
ENST00000383025.2	7.30659	5.9858	-0.287655	0.352652	0.990729
ENST00000383038.3	1.76656	1.53418	-0.203472	0.620206	0.990729
ENST00000383058.4	9.20992	8.89748	-0.049791	0.823612	0.990789
ENST00000383834.2	4.51079	4.3704	-0.0456148	0.856199	0.990789
ENST00000388909.4	6.98919	5.71838	-0.289519	0.453247	0.990729
ENST00000389640.4	6.32025	6.33364	0.00305438	0.939245	0.990789
ENST00000389897.3	3.73609	3.38782	-0.141168	0.845953	0.990789
ENST00000390329.3	6.84056	5.62092	-0.283309	0.292247	0.990729
ENST00000390540.2	9.80847	7.95157	-0.302788	0.30749	0.990729
ENST00000391359.2	6.26275	5.27648	-0.24722	0.540279	0.990729
ENST00000391625.2	7.73365	7.07307	-0.128814	0.372034	0.990729
ENST00000392471.2	6.91422	6.05783	-0.190765	0.550798	0.990729
ENST00000392929.2	4.42337	3.53342	-0.32408	0.503198	0.990729
ENST00000393264.2	6.31226	5.24594	-0.266956	0.177026	0.990729
ENST00000393507.2	3.88675	5.94805	0.613853	0.256712	0.990729
ENST00000394183.2	6.26288	4.91684	-0.349096	0.721418	0.990729
ENST00000394240.3	4.31877	6.61443	0.614995	0.213886	0.990729
ENST00000394742.3	3.75012	3.90364	0.0578842	0.893291	0.990789
ENST00000394793.2	5.3479	5.51783	0.0451286	0.794389	0.990789
ENST00000394864.2	3.45871	3.03685	-0.187659	0.743108	0.990729
ENST00000396588.2	4.03076	4.12855	0.034586	0.957573	0.992845
ENST00000396880.3	6.49638	4.21614	-0.623715	0.259653	0.990729
ENST00000396885.2	7.47666	7.84314	0.0690388	0.933922	0.990789
ENST00000397057.2	4.31515	4.31949	0.0014486	0.915254	0.990789
ENST00000397094.1	7.06851	6.11816	-0.208308	0.311387	0.990729
ENST00000397184.2	7.3174	6.66516	-0.134692	0.829791	0.990789
ENST00000397264.4	6.86111	6.42514	-0.094714	0.578376	0.990729
ENST00000397346.3	4.83568	4.7561	-0.0239398	0.836453	0.990789
ENST00000397864.2	1.95704	3.46294	0.823327	0.163408	0.990729
ENST00000398043.2	8.26614	6.53948	-0.338038	0.333531	0.990729
ENST00000398173.3	5.22867	6.90167	0.400502	0.414278	0.990729
ENST00000398216.2	6.75351	5.33597	-0.339887	0.426675	0.990729
ENST00000398554.1	7.07181	7.10007	0.00575424	0.984773	0.996967
ENST00000398669.2	4.5766	3.33953	-0.454633	0.107451	0.990729
ENST00000398777.3	1.85072	4.56476	1.30245	0.0345844	0.990729
ENST00000398796.2	7.61334	8.29162	0.123125	0.580496	0.990729
ENST00000398849.2	4.87709	4.23457	-0.203806	0.571107	0.990729
ENST00000398957.1	3.75586	5.12546	0.448537	0.145043	0.990729
ENST00000399003.1	5.35536	5.28974	-0.0177874	0.941294	0.990789
ENST00000399152.2	4.04866	2.36534	-0.7754	0.215477	0.990729
ENST00000399186.2	3.16645	6.70318	1.08198	8.48e-06	0.0112631
ENST00000399342.2	3.97713	3.89282	-0.030913	0.995358	0.999257
ENST00000399446.2	5.0394	6.67939	0.406464	0.483206	0.990729
ENST00000399447.3	3.51098	3.60122	0.036615	0.870785	0.990789
ENST00000399449.3	6.10963	5.40311	-0.177294	0.253225	0.990729
ENST00000399508.2	0.98783	1.6076	0.702571	0.346751	0.990729
ENST00000399543.1	6.32798	6.85321	0.115035	0.54435	0.990729
ENST00000399760.2	6.45676	5.80364	-0.153853	0.388183	0.990729
ENST00000399866.3	11.1995	12.8748	0.201115	0.518529	0.990729
ENST00000399868.2	4.89184	5.16539	0.0785008	0.620856	0.990729
ENST00000399869.1	4.99188	5.21821	0.0639725	0.719665	0.990729
ENST00000399894.2	3.70186	4.48152	0.275739	0.621144	0.990729
ENST00000400178.2	4.88115	3.43428	-0.507214	0.283269	0.990729
ENST00000400192.4	1.76174	1.64601	-0.0980305	0.953143	0.992716
ENST00000400306.2	4.70397	3.33674	-0.495439	0.0556016	0.990729
ENST00000400362.2	6.47257	5.58897	-0.211757	0.408293	0.990729
ENST00000400432.3	4.6896	3.14824	-0.57492	0.277494	0.990729
ENST00000400755.3	13.7342	17.8822	0.380746	0.116315	0.990729
ENST00000400768.2	5.44859	6.87723	0.335946	0.578452	0.990729
ENST00000400864.3	4.54235	3.61403	-0.329831	0.313693	0.990729
ENST00000400873.3	6.54479	5.15672	-0.343893	0.0935222	0.990729
ENST00000400902.4	11.2291	8.16052	-0.460503	0.19819	0.990729
ENST00000400946.2	5.26496	3.97877	-0.404101	0.126543	0.990729
ENST00000400985.3	9.31699	8.75456	-0.0898281	0.870785	0.990789
ENST00000401008.2	1.73569	1.60638	-0.111696	0.641361	0.990729
ENST00000401018.1	8.14736	7.08085	-0.20241	0.282583	0.990729
ENST00000402410.2	2.86614	3.96096	0.46674	0.60849	0.990729
ENST00000403371.2	6.87324	5.03376	-0.449353	0.290214	0.990729
ENST00000404616.2	6.9234	7.5427	0.123598	0.840863	0.990789
ENST00000404689.2	7.08944	7.57072	0.0947588	0.699386	0.990729
ENST00000407635.2	8.17423	9.04311	0.145736	0.290567	0.990729
ENST00000407889.2	9.47265	9.31905	-0.0235848	0.941573	0.990789
ENST00000409054.1	4.29455	3.73772	-0.200348	0.559738	0.990729
ENST00000409139.1	3.79207	3.89867	0.0399955	0.980134	0.996332
ENST00000409569.2	4.18612	4.94742	0.24106	0.621144	0.990729
ENST00000409758.1	4.69492	4.55896	-0.0423989	0.843137	0.990789
ENST00000409819.1	3.62418	3.73231	0.0424132	0.849357	0.990789
ENST00000409898.2	3.07734	4.2705	0.472723	0.372747	0.990729
ENST00000409910.1	4.69857	6.81975	0.537496	0.159179	0.990729
ENST00000410099.1	5.74221	5.88384	0.035152	0.956514	0.992716
ENST00000411413.1	1.71697	1.90892	0.152892	0.934707	0.990789
ENST00000411417.1	0.668945	1.37423	1.03866	0.497841	0.990729
ENST00000411427.1	9.93797	7.9589	-0.320381	0.252136	0.990729
ENST00000411431.1	10.7159	8.31814	-0.365418	0.457457	0.990729
ENST00000411433.1	5.9353	6.27901	0.0812167	0.929047	0.990789
ENST00000411436.1	5.32704	4.28491	-0.314071	0.525248	0.990729
ENST00000411439.1	4.34016	4.90931	0.177774	0.74813	0.990789
ENST00000411442.1	3.47736	4.27467	0.297818	0.774102	0.990789
ENST00000411451.2	6.97463	8.09468	0.214856	0.516251	0.990729
ENST00000411453.1	9.2072	6.46098	-0.51101	0.194059	0.990729
ENST00000411459.1	14.1773	12.0053	-0.239909	0.263836	0.990729
ENST00000411474.1	5.95963	4.70387	-0.341377	0.349197	0.990729
ENST00000411479.1	3.96577	4.29776	0.115982	0.74813	0.990789
ENST00000411489.1	3.05884	2.83614	-0.109055	0.721418	0.990729
ENST00000411509.1	3.79116	4.91871	0.375639	0.148449	0.990729
ENST00000411511.1	6.21351	6.63778	0.0952918	0.89712	0.990789
ENST00000411512.2	1.66959	1.59208	-0.0685792	0.731655	0.990729
ENST00000411542.1	4.69108	3.87318	-0.276402	0.620206	0.990729
ENST00000411554.1	8.09291	8.22315	0.0230313	0.809384	0.990789
ENST00000411561.1	5.74442	5.57511	-0.0431603	0.840374	0.990789
ENST00000411573.2	4.94535	5.10965	0.0471518	0.90153	0.990789
ENST00000411575.1	3.00901	2.78266	-0.112826	0.513984	0.990729
ENST00000411579.1	4.46424	5.84372	0.388472	0.408944	0.990729
ENST00000411581.1	2.24566	4.09157	0.865515	0.20572	0.990729
ENST00000411595.1	8.29295	7.63538	-0.119186	0.733134	0.990729
ENST00000411615.1	4.75502	4.43893	-0.0992402	0.74071	0.990729
ENST00000411643.1	3.55136	5.75742	0.697054	0.192416	0.990729
ENST00000411670.1	4.51068	3.89901	-0.210236	0.631499	0.990729
ENST00000411685.2	5.59663	6.5513	0.227224	0.621144	0.990729
ENST00000411694.1	5.30077	5.89297	0.152796	0.733177	0.990729
ENST00000411701.1	4.37451	3.99348	-0.131478	0.893291	0.990789
ENST00000411708.1	6.29814	8.52196	0.436259	0.250848	0.990729
ENST00000411710.1	6.14384	5.15108	-0.254264	0.525248	0.990729
ENST00000411721.1	2.62756	2.4313	-0.111994	0.731655	0.990729
ENST00000411727.1	5.6246	5.6524	0.00711306	0.929854	0.990789
ENST00000411728.1	3.26913	3.55005	0.118932	0.834205	0.990789
ENST00000411733.1	15.7619	17.0062	0.109616	0.730942	0.990729
ENST00000411738.1	8.7399	6.95651	-0.329253	0.229707	0.990729
ENST00000411746.1	21.4747	24.6061	0.19638	0.282935	0.990729
ENST00000411759.1	9.72156	8.70298	-0.159678	0.644134	0.990729
ENST00000411760.1	1.09736	1.6347	0.574994	0.390396	0.990729
ENST00000411785.1	5.33197	3.32744	-0.680256	0.350927	0.990729
ENST00000411790.1	9.30204	8.27655	-0.168517	0.461001	0.990729
ENST00000411797.1	2.39592	3.34939	0.48332	0.506004	0.990729
ENST00000411798.1	3.91291	2.25629	-0.794293	0.0220955	0.974252
ENST00000411804.1	2.71586	4.63519	0.771219	0.114376	0.990729
ENST00000411815.3	4.33153	3.4306	-0.336419	0.713788	0.990729
ENST00000411824.1	9.61848	7.15113	-0.427638	0.098871	0.990729
ENST00000411838.1	4.71385	3.78358	-0.317152	0.43856	0.990729
ENST00000411839.1	7.89897	9.20852	0.221304	0.549377	0.990729
ENST00000411847.1	3.84109	4.30088	0.163117	0.638702	0.990729
ENST00000411856.1	8.87597	10.2623	0.20938	0.50198	0.990729
ENST00000411862.1	5.9226	5.04812	-0.230483	0.606791	0.990729
ENST00000411879.1	4.81922	4.22197	-0.190883	0.471603	0.990729
ENST00000411895.1	1.25985	2.30945	0.874297	0.441076	0.990729
ENST00000411903.1	0.922547	2.03051	1.13815	0.389054	0.990729
ENST00000411906.1	8.77516	7.61985	-0.203663	0.495626	0.990729
ENST00000411940.1	1.04817	4.42878	2.07904	0.143374	0.990729
ENST00000411941.1	3.29492	5.39489	0.711354	0.236129	0.990729
ENST00000411946.1	2.62906	4.32124	0.716898	0.260387	0.990729
ENST00000411949.1	4.71697	3.95521	-0.254105	0.635288	0.990729
ENST00000411954.1	1.0561	0.91521	-0.206571	0.721418	0.990729
ENST00000411956.1	8.19465	7.65711	-0.0978819	0.714217	0.990729
ENST00000411969.1	1.40776	1.79568	0.351125	0.785385	0.990789
ENST00000411978.1	3.44316	2.9837	-0.206632	0.737714	0.990729
ENST00000411981.1	1.95829	2.91644	0.574614	0.521933	0.990729
ENST00000411992.1	4.33094	6.58945	0.605478	0.0462643	0.990729
ENST00000412014.1	4.30754	3.03402	-0.505633	0.536246	0.990729
ENST00000412017.1	1.07546	1.25816	0.226367	0.610283	0.990729
ENST00000412060.1	4.00744	5.0228	0.325813	0.58795	0.990729
ENST00000412065.1	2.0493	4.33735	1.08168	0.0712958	0.990729
ENST00000412067.1	5.68316	6.40057	0.171508	0.795066	0.990789
ENST00000412069.1	3.05412	2.94202	-0.0539509	0.901967	0.990789
ENST00000412085.1	5.84677	8.43	0.527893	0.237037	0.990729
ENST00000412091.1	6.33158	4.99548	-0.341942	0.32441	0.990729
ENST00000412092.2	14.835	21.8185	0.556545	0.0130076	0.877996
ENST00000412095.1	3.5571	4.31473	0.278568	0.45818	0.990729
ENST00000412098.2	3.90444	3.68677	-0.0827563	0.881487	0.990789
ENST00000412112.3	4.48979	2.77063	-0.696434	0.0481173	0.990729
ENST00000412115.1	3.50122	4.09984	0.227707	0.605068	0.990729
ENST00000412132.1	8.89906	8.63041	-0.0442243	0.999938	0.999938
ENST00000412134.1	2.88784	3.31027	0.196957	0.550539	0.990729
ENST00000412137.1	5.42152	5.07076	-0.096494	0.971774	0.994747
ENST00000412149.1	11.6967	14.3506	0.295007	0.236159	0.990729
ENST00000412153.1	4.72764	3.9382	-0.263583	0.503198	0.990729
ENST00000412174.1	3.53152	3.89982	0.143118	0.85785	0.990789
ENST00000412193.1	5.24841	4.89977	-0.0991649	0.972924	0.994747
ENST00000412196.1	5.80043	10.4276	0.846172	0.20572	0.990729
ENST00000412197.1	5.35721	2.42797	-1.14173	0.227318	0.990729
ENST00000412204.2	12.6045	12.5427	-0.00709037	0.861808	0.990789
ENST00000412218.1	4.26015	3.69247	-0.206316	0.633517	0.990729
ENST00000412221.1	3.99955	4.57605	0.194264	0.774102	0.990789
ENST00000412228.1	4.85745	6.03587	0.313364	0.302659	0.990729
ENST00000412239.1	5.34159	5.20475	-0.0374411	0.913822	0.990789
ENST00000412240.1	11.4062	10.2806	-0.149895	0.550798	0.990729
ENST00000412241.1	6.24827	6.92199	0.14773	0.913822	0.990789
ENST00000412242.1	3.60341	4.97928	0.466574	0.277526	0.990729
ENST00000412244.1	4.60407	4.38139	-0.0715211	0.848825	0.990789
ENST00000412262.2	4.55927	4.49611	-0.0201247	0.906613	0.990789
ENST00000412276.1	5.09312	4.20336	-0.277007	0.550798	0.990729
ENST00000412294.1	4.63046	3.38329	-0.452729	0.0410692	0.990729
ENST00000412295.2	7.95284	7.07207	-0.169336	0.735241	0.990729
ENST00000412297.1	2.72722	4.9106	0.848468	0.192416	0.990729
ENST00000412311.1	3.17787	4.72384	0.571898	0.352671	0.990729
ENST00000412312.1	4.17859	4.66607	0.159193	0.791198	0.990789
ENST00000412313.1	5.18119	4.94478	-0.067375	0.726334	0.990729
ENST00000412321.1	12.1953	7.67355	-0.66836	0.00171366	0.452203
ENST00000412339.1	7.64998	6.85694	-0.15789	0.851754	0.990789
ENST00000412344.1	7.973	8.31769	0.0610603	0.795066	0.990789
ENST00000412348.1	1.59435	2.62994	0.722055	0.484656	0.990729
ENST00000412357.1	5.02773	5.45625	0.118003	0.968072	0.994747
ENST00000412362.1	4.99631	3.98387	-0.326694	0.600914	0.990729
ENST00000412376.1	3.14821	4.30884	0.452768	0.0953219	0.990729
ENST00000412378.1	5.57756	4.7372	-0.2356	0.520528	0.990729
ENST00000412381.1	7.93692	7.81704	-0.0219564	0.902724	0.990789
ENST00000412387.1	5.04834	4.95994	-0.0254864	0.864132	0.990789
ENST00000412388.1	9.43075	8.66041	-0.122938	0.74071	0.990729
ENST00000412405.1	6.85895	6.85464	-0.000906314	0.89712	0.990789
ENST00000412409.3	5.38957	5.01452	-0.104059	0.840374	0.990789
ENST00000412410.1	5.10647	7.00977	0.457041	0.409938	0.990729
ENST00000412413.1	3.21725	3.53586	0.136236	0.834205	0.990789
ENST00000412422.2	5.41744	6.12368	0.176788	0.380475	0.990729
ENST00000412424.1	4.98869	6.0825	0.286005	0.48893	0.990729
ENST00000412426.1	3.34605	3.97349	0.247946	0.541236	0.990729
ENST00000412427.1	8.87898	7.68168	-0.20897	0.072618	0.990729
ENST00000412431.2	2.06727	2.29866	0.153062	0.597246	0.990729
ENST00000412439.1	5.73095	6.38653	0.156258	0.904196	0.990789
ENST00000412445.1	6.17521	5.05647	-0.288359	0.457457	0.990729
ENST00000412483.1	4.24543	5.36626	0.338007	0.1673	0.990729
ENST00000412485.1	6.22755	5.33491	-0.223198	0.407362	0.990729
ENST00000412486.1	3.45434	5.0253	0.5408	0.247953	0.990729
ENST00000412492.1	4.41021	3.34221	-0.400043	0.586161	0.990729
ENST00000412497.1	4.49291	6.58038	0.55052	0.28003	0.990729
ENST00000412518.1	6.76359	7.0727	0.0644713	0.878612	0.990789
ENST00000412519.1	5.66636	4.02085	-0.494923	0.0929524	0.990729
ENST00000412549.2	5.2009	5.08544	-0.0323915	0.752034	0.990789
ENST00000412563.1	6.62408	4.82354	-0.457627	0.302928	0.990729
ENST00000412571.1	6.53562	4.65478	-0.489611	0.320739	0.990729
ENST00000412593.1	5.91461	4.43938	-0.413923	0.185353	0.990729
ENST00000412602.1	4.78542	6.65604	0.47602	0.36403	0.990729
ENST00000412606.1	5.39641	5.21893	-0.0482459	0.967388	0.994747
ENST00000412628.1	4.45184	5.00753	0.169697	0.922229	0.990789
ENST00000412631.1	9.43822	6.492	-0.539851	0.375719	0.990729
ENST00000412639.2	4.6811	7.20626	0.622403	0.0247498	0.974252
ENST00000412640.2	6.64137	5.73989	-0.210456	0.552906	0.990729
ENST00000412643.1	4.33394	3.06513	-0.499728	0.238644	0.990729
ENST00000412647.2	2.97521	3.12448	0.0706233	0.733924	0.990729
ENST00000412652.1	3.72585	5.19284	0.478956	0.313623	0.990729
ENST00000412656.1	3.94231	4.08439	0.051083	0.89712	0.990789
ENST00000412666.1	3.78119	3.02683	-0.321033	0.735079	0.990729
ENST00000412669.1	3.3813	4.80924	0.508228	0.331493	0.990729
ENST00000412672.1	5.99107	6.515	0.120952	0.730942	0.990729
ENST00000412674.1	8.10694	7.32319	-0.146685	0.353106	0.990729
ENST00000412690.1	5.53962	5.65658	0.030145	0.819865	0.990789
ENST00000412695.1	6.22138	5.28979	-0.234024	0.515325	0.990729
ENST00000412701.1	8.5054	8.30151	-0.0350049	0.901967	0.990789
ENST00000412712.1	6.91047	6.85047	-0.0125819	0.862228	0.990789
ENST00000412713.1	4.99619	5.23401	0.0670883	0.89712	0.990789
ENST00000412714.1	14.9694	14.7383	-0.0224463	0.932436	0.990789
ENST00000412722.1	7.28454	5.94909	-0.292169	0.52954	0.990729
ENST00000412745.1	2.95133	4.19531	0.507408	0.310193	0.990729
ENST00000412749.1	6.01849	7.46468	0.310678	0.459427	0.990729
ENST00000412751.1	3.27557	2.12917	-0.621456	0.412641	0.990729
ENST00000412754.1	5.36941	5.48643	0.0311048	0.980134	0.996332
ENST00000412759.1	1.65827	3.58926	1.11401	0.0358781	0.990729
ENST00000412772.1	4.1826	5.22602	0.321311	0.390474	0.990729
ENST00000412773.1	4.83267	3.62552	-0.414635	0.496106	0.990729
ENST00000412789.1	7.39764	4.9498	-0.579692	0.162761	0.990729
ENST00000412797.1	8.89244	9.74956	0.132759	0.70822	0.990729
ENST00000412798.1	6.70869	7.15192	0.0922984	0.905134	0.990789
ENST00000412800.1	3.92452	2.35166	-0.738837	0.319894	0.990729
ENST00000412809.1	5.33706	4.5708	-0.2236	0.503198	0.990729
ENST00000412811.1	5.57341	4.61856	-0.271116	0.626583	0.990729
ENST00000412812.1	2.10898	3.23412	0.616828	0.373672	0.990729
ENST00000412828.1	3.23476	4.44736	0.459292	0.352671	0.990729
ENST00000412835.1	5.21221	5.54751	0.0899444	0.716537	0.990729
ENST00000412838.1	4.49408	5.25959	0.226924	0.671515	0.990729
ENST00000412855.2	6.17355	5.46005	-0.177187	0.626583	0.990729
ENST00000412856.1	3.48797	5.04327	0.531971	0.264237	0.990729
ENST00000412871.1	5.9148	6.62125	0.162774	0.524316	0.990729
ENST00000412872.3	6.64939	8.58168	0.368037	0.123432	0.990729
ENST00000412896.1	5.49283	2.3779	-1.20786	0.0376213	0.990729
ENST00000412900.2	3.46709	3.13196	-0.146661	0.611888	0.990729
ENST00000412928.1	1.92309	2.76373	0.523189	0.554361	0.990729
ENST00000412932.1	2.66595	1.88702	-0.498536	0.219947	0.990729
ENST00000412944.1	6.35532	3.59633	-0.821438	0.0762652	0.990729
ENST00000412951.1	5.74421	7.90881	0.461354	0.682101	0.990729
ENST00000412954.1	5.06641	6.49899	0.359252	0.327227	0.990729
ENST00000412972.1	3.26344	3.83091	0.231291	0.755151	0.990789
ENST00000412986.1	6.21164	5.58314	-0.153896	0.743801	0.990729
ENST00000412996.1	2.99756	2.18053	-0.45911	0.412641	0.990729
ENST00000413004.1	5.51872	6.19791	0.167446	0.806759	0.990789
ENST00000413005.1	4.08598	4.6369	0.182482	0.55686	0.990729
ENST00000413030.2	4.20765	4.62763	0.13726	0.85785	0.990789
ENST00000413039.1	2.2205	3.62649	0.707694	0.115279	0.990729
ENST00000413042.2	5.85881	5.12663	-0.192596	0.377562	0.990729
ENST00000413043.1	4.93553	4.9193	-0.00474905	0.971774	0.994747
ENST00000413050.1	8.98136	7.91061	-0.183144	0.561107	0.990729
ENST00000413056.1	2.1727	3.54886	0.707867	0.497841	0.990729
ENST00000413062.1	4.24411	5.0468	0.249906	0.63149	0.990729
ENST00000413063.1	4.54798	4.90869	0.110112	0.806759	0.990789
ENST00000413066.1	2.83511	3.34639	0.239199	0.820066	0.990789
ENST00000413070.1	6.50148	5.28141	-0.299844	0.525248	0.990729
ENST00000413074.1	3.678	3.317	-0.149038	0.644306	0.990729
ENST00000413077.1	4.9825	3.30443	-0.592466	0.219947	0.990729
ENST00000413088.1	9.97631	7.25206	-0.460115	0.314262	0.990729
ENST00000413094.1	5.11218	4.48175	-0.189875	0.877812	0.990789
ENST00000413096.1	5.43619	7.00485	0.365758	0.36528	0.990729
ENST00000413103.1	7.80104	5.78864	-0.430441	0.586161	0.990729
ENST00000413121.1	3.76982	3.24442	-0.216537	0.620206	0.990729
ENST00000413129.1	6.29353	5.22398	-0.268721	0.314254	0.990729
ENST00000413145.1	7.75041	5.12984	-0.595358	0.149526	0.990729
ENST00000413148.1	2.84872	3.2039	0.169514	0.931145	0.990789
ENST00000413151.1	7.02494	6.0638	-0.212265	0.631499	0.990729
ENST00000413159.1	5.06958	6.40674	0.337726	0.774102	0.990789
ENST00000413179.1	3.07723	4.36013	0.502739	0.309119	0.990729
ENST00000413182.1	6.64858	4.92746	-0.432205	0.238644	0.990729
ENST00000413185.2	5.43267	5.53401	0.0266645	0.972706	0.994747
ENST00000413202.1	4.89478	4.83308	-0.0183026	0.834205	0.990789
ENST00000413220.1	9.44291	7.7522	-0.284626	0.390316	0.990729
ENST00000413227.1	6.53036	7.04133	0.108685	0.794389	0.990789
ENST00000413231.1	2.61019	3.29969	0.338176	0.733924	0.990729
ENST00000413240.1	4.34685	4.3222	-0.00820698	0.864132	0.990789
ENST00000413244.1	9.02511	7.55976	-0.255604	0.486788	0.990729
ENST00000413246.1	2.50585	3.32078	0.406224	0.709843	0.990729
ENST00000413247.1	3.09185	4.30946	0.479039	0.379564	0.990729
ENST00000413249.1	2.55244	2.73645	0.100431	0.918428	0.990789
ENST00000413254.1	2.71509	4.68001	0.785514	0.484656	0.990729
ENST00000413269.3	5.98196	6.1085	0.0302017	0.892461	0.990789
ENST00000413271.1	3.54048	3.68545	0.0578928	0.774102	0.990789
ENST00000413274.1	7.0495	6.89687	-0.0315802	0.938089	0.990789
ENST00000413286.1	3.61151	3.89715	0.109817	0.893291	0.990789
ENST00000413290.1	4.94979	5.24438	0.0834071	0.824557	0.990789
ENST00000413291.1	3.59745	3.28997	-0.128898	0.857803	0.990789
ENST00000413304.2	5.42143	4.91864	-0.140414	0.631499	0.990729
ENST00000413311.1	4.46833	4.11543	-0.118693	0.893291	0.990789
ENST00000413315.1	3.8599	2.42793	-0.66884	0.208159	0.990729
ENST00000413324.1	3.98518	5.40665	0.440089	0.550033	0.990729
ENST00000413328.1	5.06055	5.42262	0.0996952	0.904196	0.990789
ENST00000413332.1	5.10502	5.47732	0.101553	0.823479	0.990789
ENST00000413347.2	5.35467	5.98652	0.160921	0.567057	0.990729
ENST00000413352.2	4.7173	3.64583	-0.371712	0.188731	0.990729
ENST00000413353.1	2.47901	3.12946	0.336151	0.453826	0.990729
ENST00000413385.1	3.59897	4.91402	0.449317	0.327227	0.990729
ENST00000413403.1	3.42788	4.41833	0.366184	0.427207	0.990729
ENST00000413406.1	3.72566	4.48061	0.2662	0.58795	0.990729
ENST00000413431.1	5.48648	3.85557	-0.508936	0.536246	0.990729
ENST00000413451.1	4.35144	3.07203	-0.502299	0.300922	0.990729
ENST00000413458.1	1.19756	1.69814	0.503857	0.820066	0.990789
ENST00000413483.1	5.95947	5.44557	-0.130102	0.633161	0.990729
ENST00000413494.1	5.86608	6.52466	0.153506	0.671105	0.990729
ENST00000413496.2	4.26161	3.23521	-0.397541	0.594104	0.990729
ENST00000413501.1	5.03363	4.62971	-0.120677	0.643589	0.990729
ENST00000413504.1	1.95822	1.64267	-0.253492	0.490551	0.990729
ENST00000413519.1	4.44556	3.86078	-0.203471	0.563505	0.990729
ENST00000413525.1	1.83659	2.0225	0.139112	0.847172	0.990789
ENST00000413528.1	7.15263	5.41392	-0.4018	0.171088	0.990729
ENST00000413531.1	3.77199	3.83516	0.0239628	0.979377	0.996332
ENST00000413541.1	4.22488	4.66169	0.141941	0.677362	0.990729
ENST00000413549.1	2.93104	5.69228	0.957595	0.0680133	0.990729
ENST00000413557.1	3.43348	5.51384	0.683385	0.352671	0.990729
ENST00000413564.1	5.63017	1.87508	-1.58622	0.0100842	0.826486
ENST00000413567.1	5.19678	4.83629	-0.103718	0.743853	0.990729
ENST00000413586.1	4.45733	6.33821	0.507894	0.338564	0.990729
ENST00000413602.1	6.98968	5.68007	-0.299318	0.16949	0.990729
ENST00000413606.1	5.68745	4.18408	-0.442871	0.32441	0.990729
ENST00000413645.1	2.13192	3.2623	0.613733	0.260387	0.990729
ENST00000413650.1	5.67023	13.9508	1.29887	0.0160886	0.928176
ENST00000413669.1	3.27869	2.98069	-0.137473	0.911508	0.990789
ENST00000413674.1	3.10279	2.35749	-0.396316	0.713788	0.990729
ENST00000413706.1	6.5148	5.60693	-0.21651	0.477346	0.990729
ENST00000413708.1	4.20437	5.09152	0.276205	0.56451	0.990729
ENST00000413745.1	4.18058	4.06985	-0.0387275	0.947208	0.992716
ENST00000413757.1	1.38711	4.20946	1.60155	0.0629833	0.990729
ENST00000413763.1	7.52665	6.82731	-0.140691	0.513405	0.990729
ENST00000413768.1	2.36196	2.10818	-0.163982	0.56236	0.990729
ENST00000413794.2	5.16352	3.92108	-0.397102	0.337678	0.990729
ENST00000413796.1	6.19268	5.40762	-0.195568	0.743801	0.990729
ENST00000413801.1	1.70586	1.95683	0.198019	0.888031	0.990789
ENST00000413810.1	7.68565	6.74549	-0.188246	0.633517	0.990729
ENST00000413820.1	7.01399	6.86593	-0.0307797	0.896612	0.990789
ENST00000413841.1	3.25685	3.43775	0.0779851	0.918428	0.990789
ENST00000413842.1	3.16749	4.19055	0.403801	0.189822	0.990729
ENST00000413845.1	3.55321	3.51657	-0.0149571	0.991029	0.996967
ENST00000413848.1	9.38773	9.2724	-0.0178328	0.990013	0.996967
ENST00000413887.1	6.2918	2.74809	-1.19504	0.0816018	0.990729
ENST00000413897.2	2.82766	2.90413	0.0384979	0.978692	0.996332
ENST00000413898.2	3.44748	3.58564	0.0566864	0.760668	0.990789
ENST00000413901.1	6.92889	4.39348	-0.65726	0.111262	0.990729
ENST00000413904.2	4.05623	4.81058	0.246071	0.516251	0.990729
ENST00000413911.1	6.02878	5.03246	-0.260602	0.364939	0.990729
ENST00000413913.2	6.1597	5.12499	-0.265311	0.471603	0.990729
ENST00000413915.1	10.6842	7.7155	-0.469652	0.210115	0.990729
ENST00000413923.2	3.66166	4.70721	0.362374	0.459427	0.990729
ENST00000413928.1	3.54248	4.75468	0.42459	0.295343	0.990729
ENST00000413941.1	3.34617	5.99632	0.841566	0.0293916	0.990729
ENST00000413943.1	2.46494	3.57214	0.535239	0.398656	0.990729
ENST00000413944.2	2.80075	2.39589	-0.225253	0.339585	0.990729
ENST00000413954.1	2.65819	4.65502	0.808344	0.233834	0.990729
ENST00000413960.1	6.59359	5.15133	-0.356118	0.126558	0.990729
ENST00000413962.1	5.09672	3.15209	-0.69326	0.155199	0.990729
ENST00000413969.1	1.90265	4.05756	1.0926	0.100582	0.990729
ENST00000413975.1	4.83167	5.7015	0.23882	0.834205	0.990789
ENST00000413983.1	11.3125	10.1284	-0.159503	0.565505	0.990729
ENST00000413986.1	11.2089	8.47219	-0.403835	0.333531	0.990729
ENST00000413989.1	1.48986	5.41997	1.86311	0.0286498	0.990729
ENST00000413991.1	2.90044	4.4417	0.614842	0.196106	0.990729
ENST00000413993.1	3.53233	5.54193	0.649767	0.104187	0.990729
ENST00000413994.1	2.47899	4.09248	0.723227	0.192416	0.990729
ENST00000414005.1	8.92807	6.99247	-0.352545	0.488187	0.990729
ENST00000414030.1	6.84112	6.66578	-0.0374572	0.906283	0.990789
ENST00000414038.1	2.5952	2.06808	-0.327559	0.469286	0.990729
ENST00000414039.1	4.5899	5.35971	0.223693	0.677032	0.990729
ENST00000414042.1	5.75563	5.72194	-0.00846947	0.962139	0.99464
ENST00000414047.1	6.91468	5.99345	-0.206276	0.742682	0.990729
ENST00000414065.1	8.96458	7.05478	-0.345636	0.341756	0.990729
ENST00000414071.1	4.62899	4.70122	0.0223393	0.96281	0.99464
ENST00000414085.1	9.2974	10.6632	0.19774	0.596815	0.990729
ENST00000414086.1	3.70559	4.3484	0.230781	0.791198	0.990789
ENST00000414098.2	1.91812	3.08648	0.686271	0.213886	0.990729
ENST00000414102.1	4.07278	5.36606	0.397851	0.427207	0.990729
ENST00000414106.1	5.01997	7.06369	0.492744	0.310193	0.990729
ENST00000414107.1	3.55269	2.99849	-0.244677	0.515325	0.990729
ENST00000414126.1	4.05143	3.71823	-0.123813	0.893291	0.990789
ENST00000414127.1	2.24775	3.16131	0.492042	0.682101	0.990729
ENST00000414128.1	7.67288	8.20492	0.0967201	0.625384	0.990729
ENST00000414132.1	1.93211	2.0611	0.0932355	0.911508	0.990789
ENST00000414135.1	4.50906	4.73513	0.070575	0.795066	0.990789
ENST00000414141.1	6.80525	6.08139	-0.162246	0.643886	0.990729
ENST00000414157.1	4.9424	5.52525	0.160826	0.677683	0.990729
ENST00000414159.2	4.43017	4.66705	0.0751496	0.651254	0.990729
ENST00000414175.1	6.31714	6.9269	0.132938	0.770381	0.990789
ENST00000414189.1	4.78469	4.64956	-0.041332	0.857803	0.990789
ENST00000414198.1	2.40336	1.63438	-0.556309	0.249464	0.990729
ENST00000414199.1	4.29084	4.47462	0.0605043	0.980134	0.996332
ENST00000414201.2	3.8055	4.86687	0.354907	0.652388	0.990729
ENST00000414203.2	12.1329	8.97032	-0.435693	0.206038	0.990729
ENST00000414210.1	3.82302	4.41204	0.20673	0.58795	0.990729
ENST00000414223.3	1.52535	2.0697	0.44028	0.166005	0.990729
ENST00000414227.1	4.31933	4.1734	-0.0495877	0.862228	0.990789
ENST00000414261.1	4.63983	3.45906	-0.423688	0.469286	0.990729
ENST00000414264.1	3.72301	4.87861	0.389999	0.421924	0.990729
ENST00000414295.1	7.35056	4.68074	-0.651119	0.319894	0.990729
ENST00000414300.1	5.8332	4.75211	-0.295721	0.448716	0.990729
ENST00000414308.1	6.27677	5.52559	-0.183893	0.638189	0.990729
ENST00000414309.1	7.84079	6.89413	-0.185632	0.499717	0.990729
ENST00000414314.1	5.12029	6.45869	0.335017	0.48893	0.990729
ENST00000414339.1	4.17622	5.99083	0.52056	0.200807	0.990729
ENST00000414340.2	3.16731	4.8321	0.609389	0.213886	0.990729
ENST00000414344.1	3.61913	3.22617	-0.165822	0.741235	0.990729
ENST00000414345.2	7.09147	4.09042	-0.793836	0.1671	0.990729
ENST00000414354.1	9.16692	6.0404	-0.601793	0.0946099	0.990729
ENST00000414377.1	2.8854	5.36275	0.894199	0.116392	0.990729
ENST00000414382.1	5.70172	5.85332	0.0378592	0.929047	0.990789
ENST00000414383.1	3.41786	2.39837	-0.511041	0.123922	0.990729
ENST00000414386.1	7.00608	6.14241	-0.189802	0.631499	0.990729
ENST00000414393.1	7.11793	7.61923	0.0981884	0.404373	0.990729
ENST00000414394.1	3.37502	3.64416	0.110686	0.834205	0.990789
ENST00000414404.1	3.71604	4.35977	0.230487	0.621144	0.990729
ENST00000414409.1	4.04738	4.43177	0.130894	0.878612	0.990789
ENST00000414418.1	4.42148	5.86313	0.407141	0.198856	0.990729
ENST00000414422.1	1.7915	0.871627	-1.03938	0.280065	0.990729
ENST00000414426.3	7.59182	4.88874	-0.634982	0.0392937	0.990729
ENST00000414430.1	3.43163	2.83435	-0.275875	0.576826	0.990729
ENST00000414435.1	5.66808	5.28127	-0.101978	0.870785	0.990789
ENST00000414438.1	9.19299	10.7369	0.22397	0.431142	0.990729
ENST00000414442.1	6.20617	7.42069	0.257851	0.414278	0.990729
ENST00000414475.1	3.24419	2.39589	-0.437298	0.350927	0.990729
ENST00000414483.1	7.71131	6.80361	-0.180674	0.548501	0.990729
ENST00000414488.1	1.65175	2.62236	0.66687	0.309119	0.990729
ENST00000414505.1	3.4606	4.46301	0.366996	0.733924	0.990729
ENST00000414512.1	2.40777	4.17651	0.794599	0.00747158	0.788104
ENST00000414538.1	4.28237	4.45934	0.0584199	0.878612	0.990789
ENST00000414539.1	4.76149	6.24179	0.390546	0.347886	0.990729
ENST00000414548.1	4.91575	6.15364	0.32403	0.394525	0.990729
ENST00000414554.2	3.99921	4.7973	0.262504	0.443235	0.990729
ENST00000414565.1	4.08094	4.28759	0.0712672	0.971774	0.994747
ENST00000414581.1	4.36608	4.22539	-0.0472557	0.881487	0.990789
ENST00000414582.1	4.31072	5.59823	0.377044	0.48893	0.990729
ENST00000414584.1	6.18257	6.47293	0.0662117	0.733177	0.990729
ENST00000414590.1	4.1022	3.99278	-0.039006	0.995358	0.999257
ENST00000414598.1	5.69438	5.21708	-0.126298	0.743853	0.990729
ENST00000414600.1	4.80333	5.1419	0.0982673	0.956001	0.992716
ENST00000414603.1	7.78949	6.75434	-0.205714	0.554841	0.990729
ENST00000414631.1	8.56564	7.19034	-0.252501	0.431994	0.990729
ENST00000414633.1	10.5992	9.08342	-0.222651	0.402178	0.990729
ENST00000414640.1	5.52242	6.95082	0.331882	0.252715	0.990729
ENST00000414647.1	6.64099	5.04978	-0.395179	0.290214	0.990729
ENST00000414654.1	5.13073	7.35954	0.520452	0.310193	0.990729
ENST00000414661.1	5.10922	6.81751	0.416142	0.256157	0.990729
ENST00000414676.1	6.61976	5.73296	-0.207498	0.56236	0.990729
ENST00000414686.1	1.76719	2.59899	0.556497	0.260387	0.990729
ENST00000414688.1	3.30554	3.38905	0.0359971	0.864132	0.990789
ENST00000414740.2	0.83828	4.17585	2.31656	0.143374	0.990729
ENST00000414750.1	3.15538	1.95566	-0.690156	0.392224	0.990729
ENST00000414756.1	7.79957	8.06779	0.0487789	0.804537	0.990789
ENST00000414762.1	11.6546	11.8969	0.029685	0.928465	0.990789
ENST00000414765.1	4.18777	4.23321	0.015569	0.971774	0.994747
ENST00000414768.2	3.80586	3.34414	-0.186584	0.611888	0.990729
ENST00000414772.1	5.50748	4.39534	-0.325416	0.120966	0.990729
ENST00000414774.1	5.14037	5.35203	0.0582153	0.824557	0.990789
ENST00000414776.1	6.89484	4.97063	-0.472089	0.227436	0.990729
ENST00000414784.1	4.45568	5.60557	0.331215	0.483206	0.990729
ENST00000414795.1	3.80445	4.3685	0.199452	0.58795	0.990729
ENST00000414796.1	1.52326	2.1851	0.520537	0.682101	0.990729
ENST00000414798.1	6.83413	7.49504	0.133178	0.742962	0.990729
ENST00000414811.1	5.91029	4.69989	-0.330605	0.43856	0.990729
ENST00000414844.2	5.83887	5.19234	-0.169303	0.739725	0.990729
ENST00000414848.1	8.1701	6.54432	-0.320111	0.198651	0.990729
ENST00000414856.1	3.06081	3.80151	0.312658	0.550033	0.990729
ENST00000414868.1	6.09736	6.76477	0.149854	0.628451	0.990729
ENST00000414875.2	7.7008	7.91589	0.0397441	0.943649	0.991095
ENST00000414876.1	7.37157	6.47297	-0.187545	0.179697	0.990729
ENST00000414885.1	4.91483	6.20753	0.336879	0.48893	0.990729
ENST00000414886.1	7.17442	6.87355	-0.0618073	0.889213	0.990789
ENST00000414890.1	20.4054	27.1225	0.410542	0.0129445	0.877996
ENST00000414895.1	5.75688	4.024	-0.516656	0.259653	0.990729
ENST00000414896.1	4.72198	6.91364	0.550054	0.264237	0.990729
ENST00000414903.1	4.847	4.9063	0.0175434	0.995358	0.999257
ENST00000414911.1	5.53383	5.03913	-0.135102	0.730935	0.990729
ENST00000414915.1	5.46016	4.43859	-0.298841	0.520528	0.990729
ENST00000414926.1	3.97918	3.38664	-0.232619	0.721418	0.990729
ENST00000414927.1	6.60532	5.58549	-0.241945	0.635288	0.990729
ENST00000414939.1	3.99046	3.80194	-0.0698221	0.997658	0.999364
ENST00000414943.1	3.84754	5.36587	0.479877	0.290399	0.990729
ENST00000414948.1	6.13295	5.08228	-0.271104	0.477346	0.990729
ENST00000414965.1	11.0765	8.59418	-0.366076	0.220229	0.990729
ENST00000414967.1	3.1925	3.21664	0.010869	0.995358	0.999257
ENST00000414976.1	7.33343	4.85149	-0.596059	0.241155	0.990729
ENST00000414989.2	4.89037	5.03657	0.0424987	0.991029	0.996967
ENST00000414992.1	10.0333	4.65788	-1.10706	0.0220958	0.974252
ENST00000414995.1	3.35309	4.57255	0.447507	0.264344	0.990729
ENST00000415000.1	5.34805	7.99044	0.579261	0.264237	0.990729
ENST00000415004.2	3.65765	4.4896	0.295671	0.473962	0.990729
ENST00000415019.1	3.14053	2.64523	-0.247619	0.37277	0.990729
ENST00000415026.1	7.12308	4.82385	-0.562316	0.149526	0.990729
ENST00000415029.1	5.15439	5.56004	0.109295	0.972924	0.994747
ENST00000415031.1	11.8169	6.85414	-0.78581	0.0699687	0.990729
ENST00000415054.1	6.87474	5.98138	-0.200827	0.620206	0.990729
ENST00000415065.2	5.37094	6.96624	0.375204	0.427207	0.990729
ENST00000415067.1	2.14111	3.21421	0.586105	0.28003	0.990729
ENST00000415088.1	2.83039	4.82702	0.770133	0.192416	0.990729
ENST00000415101.1	7.0043	8.98017	0.358501	0.436286	0.990729
ENST00000415104.1	3.09027	2.3014	-0.425223	0.55245	0.990729
ENST00000415106.1	2.23217	3.343	0.582702	0.256712	0.990729
ENST00000415124.1	4.33664	2.71701	-0.674557	0.319894	0.990729
ENST00000415129.1	7.69726	6.59306	-0.223395	0.494077	0.990729
ENST00000415138.1	4.12322	2.58388	-0.674232	0.249464	0.990729
ENST00000415141.2	6.80094	7.08162	0.0583448	0.934886	0.990789
ENST00000415144.1	4.64506	4.87621	0.0700653	0.911508	0.990789
ENST00000415146.1	3.68277	4.19504	0.18789	0.734815	0.990729
ENST00000415147.1	7.59309	7.17088	-0.0825379	0.727211	0.990729
ENST00000415150.1	3.63252	2.73154	-0.411259	0.444948	0.990729
ENST00000415159.1	5.10492	3.62409	-0.494272	0.375719	0.990729
ENST00000415166.1	6.96078	5.72847	-0.281098	0.52954	0.990729
ENST00000415176.1	8.73185	8.01613	-0.123382	0.743168	0.990729
ENST00000415182.1	2.85696	3.5752	0.323547	0.32239	0.990729
ENST00000415194.2	5.17417	4.40308	-0.232813	0.743168	0.990729
ENST00000415195.1	7.26439	5.07324	-0.517934	0.141971	0.990729
ENST00000415201.1	7.16431	4.99469	-0.520432	0.225127	0.990729
ENST00000415202.1	6.87817	5.82532	-0.239686	0.486788	0.990729
ENST00000415205.1	8.3145	6.03857	-0.461421	0.250853	0.990729
ENST00000415218.1	7.69463	10.0608	0.386815	0.256157	0.990729
ENST00000415226.1	3.62223	3.65463	0.0128472	0.834205	0.990789
ENST00000415236.1	8.53383	5.23843	-0.704058	0.0720793	0.990729
ENST00000415237.1	2.78936	2.59614	-0.103562	0.730935	0.990729
ENST00000415245.1	7.4979	6.28405	-0.254792	0.504068	0.990729
ENST00000415246.1	2.54733	2.74824	0.10952	0.942643	0.990789
ENST00000415249.1	3.3385	4.14584	0.312466	0.569657	0.990729
ENST00000415255.1	4.1361	4.49862	0.121214	0.868547	0.990789
ENST00000415269.1	3.81065	2.89387	-0.397035	0.703562	0.990729
ENST00000415275.1	3.39036	4.44348	0.390254	0.528891	0.990729
ENST00000415283.1	2.75223	1.67934	-0.712709	0.36789	0.990729
ENST00000415295.1	5.40356	7.38748	0.451173	0.135146	0.990729
ENST00000415299.1	5.68571	7.1336	0.327289	0.347886	0.990729
ENST00000415302.1	5.53675	4.65142	-0.251369	0.911508	0.990789
ENST00000415305.2	3.77147	5.13763	0.445979	0.017077	0.932626
ENST00000415327.1	4.71089	5.29443	0.168476	0.74813	0.990789
ENST00000415330.2	4.16371	4.99893	0.263751	0.52937	0.990729
ENST00000415333.1	8.02889	7.35595	-0.12629	0.739067	0.990729
ENST00000415336.1	8.32962	8.15194	-0.0311064	0.909922	0.990789
ENST00000415338.1	2.95075	2.35517	-0.32525	0.187904	0.990729
ENST00000415340.1	0.788547	1.88462	1.25701	0.310801	0.990729
ENST00000415342.1	7.78087	4.89973	-0.667231	0.155199	0.990729
ENST00000415356.1	4.97666	3.78044	-0.396623	0.32441	0.990729
ENST00000415357.1	5.75934	4.46718	-0.36654	0.289495	0.990729
ENST00000415358.1	6.61008	6.52769	-0.0180963	0.877812	0.990789
ENST00000415359.1	8.49056	7.40889	-0.196602	0.643137	0.990729
ENST00000415386.2	8.12926	8.48105	0.0611193	0.738616	0.990729
ENST00000415387.1	2.84931	2.49209	-0.193256	0.727211	0.990729
ENST00000415391.2	5.04197	4.90453	-0.0398741	0.733134	0.990729
ENST00000415394.1	6.63901	8.22297	0.308693	0.58795	0.990729
ENST00000415399.1	10.5237	9.52263	-0.144208	0.571107	0.990729
ENST00000415410.1	7.44082	6.37867	-0.222206	0.552906	0.990729
ENST00000415412.1	5.72928	5.62155	-0.0273859	0.831516	0.990789
ENST00000415414.1	6.19491	5.46162	-0.181757	0.289712	0.990729
ENST00000415422.1	2.10136	2.87679	0.453139	0.453826	0.990729
ENST00000415423.1	4.58737	3.47198	-0.401911	0.488187	0.990729
ENST00000415434.1	7.51293	6.71622	-0.161727	0.643137	0.990729
ENST00000415448.1	5.66561	5.22541	-0.116687	0.723962	0.990729
ENST00000415451.1	3.87651	4.03908	0.0592674	0.806759	0.990789
ENST00000415457.2	4.10513	4.82286	0.232459	0.56451	0.990729
ENST00000415465.2	5.0194	6.60219	0.395429	0.501271	0.990729
ENST00000415471.2	4.04013	4.81815	0.254078	0.682101	0.990729
ENST00000415477.1	3.61592	3.59535	-0.00823354	0.913822	0.990789
ENST00000415479.1	6.138	5.16058	-0.250234	0.640381	0.990729
ENST00000415499.1	2.86696	3.25393	0.182661	0.85785	0.990789
ENST00000415502.1	4.8266	4.15647	-0.215646	0.743168	0.990729
ENST00000415503.1	7.18841	5.15673	-0.479216	0.238644	0.990729
ENST00000415504.1	5.87655	5.49309	-0.0973509	0.711769	0.990729
ENST00000415506.2	5.79699	5.61449	-0.0461478	0.865031	0.990789
ENST00000415509.1	4.37318	7.61087	0.799378	0.114376	0.990729
ENST00000415513.1	7.726	9.29106	0.266122	0.426843	0.990729
ENST00000415530.1	8.46889	7.88065	-0.103858	0.739067	0.990729
ENST00000415532.1	4.36635	6.09424	0.481019	0.264237	0.990729
ENST00000415536.1	4.46453	4.48138	0.00543718	0.89712	0.990789
ENST00000415543.1	1.38359	1.74749	0.336866	0.521933	0.990729
ENST00000415549.2	3.247	4.05594	0.320928	0.379564	0.990729
ENST00000415556.1	5.06442	3.74514	-0.435377	0.290214	0.990729
ENST00000415575.1	2.43866	3.24303	0.41125	0.58795	0.990729
ENST00000415582.1	7.20078	6.15865	-0.225539	0.638189	0.990729
ENST00000415584.2	4.08003	4.40665	0.111103	0.722848	0.990729
ENST00000415586.1	4.15581	4.12591	-0.0104182	0.972924	0.994747
ENST00000415589.1	3.39312	3.42632	0.0140485	0.980134	0.996332
ENST00000415611.3	4.22714	4.07402	-0.0532279	0.824753	0.990789
ENST00000415627.1	10.3169	6.54629	-0.65626	0.023708	0.974252
ENST00000415628.1	9.2409	7.79216	-0.246012	0.145172	0.990729
ENST00000415629.2	4.69591	4.51864	-0.0555161	0.893291	0.990789
ENST00000415640.1	5.97977	6.46676	0.112954	0.783732	0.990789
ENST00000415647.1	6.85885	6.15635	-0.15589	0.514141	0.990729
ENST00000415655.1	5.0332	7.54589	0.584216	0.202828	0.990729
ENST00000415656.1	10.4158	6.60327	-0.657526	0.201982	0.990729
ENST00000415657.1	5.43942	3.96888	-0.45472	0.358852	0.990729
ENST00000415663.1	1.19278	1.0907	-0.129078	0.941948	0.990789
ENST00000415675.2	7.79418	7.80727	0.00242092	0.890736	0.990789
ENST00000415686.1	2.65168	4.1272	0.638258	0.423771	0.990729
ENST00000415700.1	7.30345	7.8783	0.109305	0.871852	0.990789
ENST00000415706.1	2.3648	2.51714	0.0900676	0.901967	0.990789
ENST00000415714.1	4.07101	3.4634	-0.233198	0.721418	0.990729
ENST00000415715.1	3.97124	3.06535	-0.373538	0.412649	0.990729
ENST00000415726.1	6.99074	5.22128	-0.421042	0.259653	0.990729
ENST00000415731.2	1.77263	1.251	-0.502812	0.392224	0.990729
ENST00000415736.1	4.07555	2.65231	-0.619745	0.280065	0.990729
ENST00000415754.1	1.80133	2.40693	0.418137	0.554361	0.990729
ENST00000415774.1	6.46633	6.78778	0.0699932	0.968072	0.994747
ENST00000415787.1	45.2721	57.4454	0.34357	0.00835059	0.813292
ENST00000415793.1	5.34577	7.61638	0.510707	0.22531	0.990729
ENST00000415801.1	2.71465	2.3449	-0.211237	0.375711	0.990729
ENST00000415809.1	9.6886	6.30702	-0.61933	0.103484	0.990729
ENST00000415820.1	3.76231	2.83877	-0.406352	0.444948	0.990729
ENST00000415824.1	6.78195	5.09863	-0.411591	0.412649	0.990729
ENST00000415842.1	3.29763	4.37635	0.408299	0.315056	0.990729
ENST00000415865.1	6.04724	5.44236	-0.152043	0.639364	0.990729
ENST00000415875.2	1.70769	2.61143	0.612792	0.441076	0.990729
ENST00000415883.1	1.57623	1.97041	0.322023	0.521933	0.990729
ENST00000415889.2	8.38479	7.96573	-0.0739663	0.723432	0.990729
ENST00000415890.1	10.5348	7.93555	-0.40876	0.32441	0.990729
ENST00000415896.1	1.28035	2.63343	1.04041	0.214214	0.990729
ENST00000415910.2	6.80921	6.45696	-0.0766313	0.819865	0.990789
ENST00000415917.2	6.34114	6.49717	0.0350687	0.941573	0.990789
ENST00000415918.1	4.36202	3.29428	-0.405034	0.55245	0.990729
ENST00000415934.1	2.96327	3.76255	0.34452	0.63149	0.990729
ENST00000415940.1	4.30305	4.32062	0.00587874	0.885283	0.990789
ENST00000415964.1	4.6737	4.45115	-0.0703886	0.877812	0.990789
ENST00000415965.1	2.99464	2.85254	-0.0701343	0.916694	0.990789
ENST00000415970.1	2.65209	3.24828	0.292545	0.436286	0.990729
ENST00000415979.2	7.25038	10.1509	0.485482	0.277526	0.990729
ENST00000415982.1	6.46258	4.89945	-0.39949	0.43856	0.990729
ENST00000415989.1	7.12505	4.89974	-0.540195	0.289714	0.990729
ENST00000415991.1	3.77429	4.90946	0.379358	0.549889	0.990729
ENST00000415992.1	5.39795	6.62329	0.295135	0.0317951	0.990729
ENST00000416002.1	4.39513	3.0974	-0.504852	0.238644	0.990729
ENST00000416004.1	5.16393	4.61959	-0.160705	0.461001	0.990729
ENST00000416008.1	6.71372	5.18683	-0.37226	0.352287	0.990729
ENST00000416017.1	3.88993	6.4116	0.720938	0.200807	0.990729
ENST00000416032.1	4.91284	5.80725	0.241298	0.705444	0.990729
ENST00000416046.2	8.0768	7.72995	-0.0633252	0.660938	0.990729
ENST00000416061.1	8.67688	8.81502	0.0227883	0.952119	0.992716
ENST00000416069.2	7.27945	5.82897	-0.320588	0.271799	0.990729
ENST00000416076.1	2.00929	2.00758	-0.00122168	0.922229	0.990789
ENST00000416080.1	3.57827	2.91166	-0.297418	0.395922	0.990729
ENST00000416099.1	3.80413	4.20415	0.144248	0.972924	0.994747
ENST00000416100.1	7.42863	5.59854	-0.408043	0.469286	0.990729
ENST00000416105.1	3.40264	4.19769	0.302941	0.650599	0.990729
ENST00000416111.1	1.64317	2.37338	0.530461	0.331493	0.990729
ENST00000416119.1	6.28355	7.05574	0.167218	0.778886	0.990789
ENST00000416150.1	3.60332	2.75564	-0.38694	0.565749	0.990729
ENST00000416173.1	5.59189	5.02065	-0.155463	0.626583	0.990729
ENST00000416182.1	7.40088	4.30934	-0.780229	0.0884953	0.990729
ENST00000416190.1	4.0778	4.13337	0.0195275	0.98135	0.996735
ENST00000416191.2	3.40361	3.8318	0.170957	0.360564	0.990729
ENST00000416202.1	3.10098	3.21748	0.0532092	0.942643	0.990789
ENST00000416204.1	8.77094	9.19722	0.0684656	0.838078	0.990789
ENST00000416205.2	4.41305	2.95758	-0.577359	0.395922	0.990729
ENST00000416220.1	3.52576	5.18916	0.557567	0.193729	0.990729
ENST00000416221.1	5.97169	4.17348	-0.516888	0.259653	0.990729
ENST00000416226.1	2.32945	2.98752	0.358957	0.86933	0.990789
ENST00000416229.1	7.59309	8.16125	0.104102	0.752442	0.990789
ENST00000416237.1	3.26727	3.83774	0.23217	0.834205	0.990789
ENST00000416242.1	8.16512	8.02206	-0.0255018	0.951991	0.992716
ENST00000416249.1	6.29368	5.98407	-0.0727768	0.867415	0.990789
ENST00000416260.1	5.45492	6.0557	0.150736	0.783732	0.990789
ENST00000416262.1	3.83131	3.76958	-0.023433	0.971774	0.994747
ENST00000416279.1	6.45708	5.17996	-0.317941	0.515325	0.990729
ENST00000416310.1	7.13012	5.49503	-0.3758	0.426675	0.990729
ENST00000416327.1	3.57184	4.38871	0.297132	0.338564	0.990729
ENST00000416329.1	2.15259	3.30252	0.617495	0.352671	0.990729
ENST00000416341.1	6.35049	4.23168	-0.585639	0.300922	0.990729
ENST00000416343.2	5.82669	4.57329	-0.349445	0.337678	0.990729
ENST00000416344.1	2.99031	4.11378	0.460171	0.427207	0.990729
ENST00000416349.1	3.25523	2.61175	-0.317744	0.586161	0.990729
ENST00000416350.1	4.2787	6.67687	0.642	0.148034	0.990729
ENST00000416352.1	7.38345	8.71208	0.238722	0.488268	0.990729
ENST00000416361.1	10.3119	9.17737	-0.168154	0.301435	0.990729
ENST00000416385.1	8.38138	8.16475	-0.0377787	0.769845	0.990789
ENST00000416401.1	3.3394	1.38816	-1.26641	0.0756976	0.990729
ENST00000416405.1	10.1753	9.19902	-0.14552	0.420332	0.990729
ENST00000416406.1	6.956	6.88886	-0.0139937	0.951991	0.992716
ENST00000416416.1	5.49343	3.95513	-0.473982	0.0402321	0.990729
ENST00000416424.1	7.37338	6.73978	-0.129623	0.511998	0.990729
ENST00000416437.1	3.64799	3.85602	0.0800069	0.980134	0.996332
ENST00000416448.2	8.36693	6.46418	-0.372229	0.503198	0.990729
ENST00000416453.2	6.13818	5.58483	-0.136296	0.644354	0.990729
ENST00000416455.1	2.68354	2.98956	0.155797	0.85785	0.990789
ENST00000416463.1	8.77754	8.22441	-0.0939057	0.738169	0.990729
ENST00000416468.1	10.1693	11.1987	0.139121	0.834205	0.990789
ENST00000416473.1	6.74941	5.2807	-0.354032	0.426675	0.990729
ENST00000416481.1	1.72233	3.87526	1.16993	0.0695115	0.990729
ENST00000416502.1	6.72831	4.07076	-0.724945	0.350927	0.990729
ENST00000416507.1	2.95674	4.69618	0.667481	0.256712	0.990729
ENST00000416509.1	3.85153	5.00769	0.378716	0.394525	0.990729
ENST00000416510.1	5.90476	7.26266	0.29862	0.383106	0.990729
ENST00000416513.1	4.30678	4.01522	-0.101131	0.893291	0.990789
ENST00000416521.2	2.80823	2.98259	0.0869071	0.774102	0.990789
ENST00000416527.1	4.58572	3.18313	-0.5267	0.430008	0.990729
ENST00000416534.1	5.28598	3.86991	-0.44987	0.244901	0.990729
ENST00000416553.1	6.60684	6.63071	0.0052035	0.942578	0.990789
ENST00000416554.1	8.99945	6.83433	-0.397038	0.432856	0.990729
ENST00000416555.1	7.30236	6.49842	-0.168275	0.738169	0.990729
ENST00000416563.1	3.87516	5.02652	0.375302	0.733924	0.990729
ENST00000416570.1	9.35008	6.6753	-0.486146	0.165859	0.990729
ENST00000416575.1	8.99686	8.61967	-0.0617889	0.728663	0.990729
ENST00000416593.1	5.742	5.48298	-0.0665912	0.742682	0.990729
ENST00000416595.1	9.55007	10.1028	0.0811727	0.979377	0.996332
ENST00000416598.2	5.69271	3.27576	-0.797282	0.0154389	0.928176
ENST00000416607.1	5.80133	4.68542	-0.308204	0.496106	0.990729
ENST00000416615.1	4.50145	4.23998	-0.0863331	0.458873	0.990729
ENST00000416638.1	4.5071	3.76732	-0.258661	0.520528	0.990729
ENST00000416641.1	8.33329	3.86672	-1.10778	0.00783185	0.805742
ENST00000416646.1	8.95833	9.81036	0.131076	0.973814	0.995239
ENST00000416650.1	3.61188	4.31207	0.255631	0.636289	0.990729
ENST00000416657.1	2.6978	5.78163	1.09969	0.0471007	0.990729
ENST00000416664.1	2.24701	0.924473	-1.2813	0.115698	0.990729
ENST00000416679.1	2.07805	1.52558	-0.445873	0.536246	0.990729
ENST00000416680.1	3.04669	3.56198	0.225438	0.74813	0.990789
ENST00000416685.1	6.80597	5.11738	-0.411396	0.250853	0.990729
ENST00000416696.1	10.546	11.9982	0.186112	0.568328	0.990729
ENST00000416700.1	4.68225	6.38387	0.44723	0.271847	0.990729
ENST00000416708.1	4.95849	6.58009	0.408207	0.277526	0.990729
ENST00000416725.1	5.17089	6.89139	0.414383	0.361529	0.990729
ENST00000416758.1	1.21177	1.90789	0.65486	0.610283	0.990729
ENST00000416809.2	5.74224	6.7341	0.229871	0.564609	0.990729
ENST00000416826.2	4.73643	4.80399	0.0204346	0.953565	0.992716
ENST00000416842.1	4.23135	6.32702	0.580411	0.208471	0.990729
ENST00000416845.1	5.87033	7.19876	0.294306	0.459427	0.990729
ENST00000416854.1	4.50057	4.10393	-0.1331	0.911508	0.990789
ENST00000416860.2	6.75063	7.61389	0.173612	0.21827	0.990729
ENST00000416861.1	4.32132	3.1683	-0.447763	0.375719	0.990729
ENST00000416869.1	11.7295	9.01237	-0.380163	0.314262	0.990729
ENST00000416873.1	10.0619	6.79455	-0.566452	0.300922	0.990729
ENST00000416908.1	3.92141	5.47747	0.482137	0.352671	0.990729
ENST00000416928.2	5.62612	5.54766	-0.0202603	0.980743	0.996735
ENST00000416930.2	5.12587	5.23901	0.0314971	0.997658	0.999364
ENST00000416948.1	6.65121	6.21352	-0.0982049	0.725153	0.990729
ENST00000416958.1	2.89646	4.49463	0.633916	0.346751	0.990729
ENST00000416959.1	6.66111	6.61284	-0.0104932	0.909922	0.990789
ENST00000416982.1	9.81527	7.99678	-0.295609	0.0535944	0.990729
ENST00000416995.1	13.6584	9.71284	-0.49182	0.311231	0.990729
ENST00000416996.1	3.76577	4.88793	0.37628	0.436811	0.990729
ENST00000416999.1	2.54275	3.3983	0.418427	0.733924	0.990729
ENST00000417006.1	3.37126	5.18996	0.622438	0.124992	0.990729
ENST00000417011.1	5.03298	3.63443	-0.469685	0.250853	0.990729
ENST00000417026.1	7.43764	8.14728	0.131473	0.691555	0.990729
ENST00000417038.1	3.61901	4.67333	0.368856	0.506004	0.990729
ENST00000417039.1	5.06309	5.49776	0.118826	0.721994	0.990729
ENST00000417047.1	10.972	7.82104	-0.488389	0.149778	0.990729
ENST00000417054.1	8.29425	6.15178	-0.431106	0.302928	0.990729
ENST00000417083.1	5.38546	5.11372	-0.0746958	0.840374	0.990789
ENST00000417084.1	2.38969	2.39274	0.00184016	0.987974	0.996967
ENST00000417086.1	3.13795	3.9542	0.333565	0.461814	0.990729
ENST00000417096.1	4.12269	5.4484	0.402247	0.36403	0.990729
ENST00000417112.1	7.19253	6.91642	-0.0564739	0.789007	0.990789
ENST00000417120.1	2.6231	3.88059	0.565007	0.309119	0.990729
ENST00000417135.1	11.5125	9.04992	-0.347218	0.166466	0.990729
ENST00000417138.1	1.54848	2.61797	0.757601	0.310801	0.990729
ENST00000417149.1	5.9453	6.53826	0.137158	0.74813	0.990789
ENST00000417161.1	6.2733	3.26787	-0.940875	0.0804828	0.990729
ENST00000417213.1	5.10768	4.7278	-0.111497	0.741235	0.990729
ENST00000417218.1	3.09043	3.44579	0.157027	0.415029	0.990729
ENST00000417221.4	5.18293	5.63202	0.119885	0.89712	0.990789
ENST00000417232.2	4.31302	4.63562	0.104065	0.804537	0.990789
ENST00000417244.1	7.524	9.49751	0.33605	0.506004	0.990729
ENST00000417260.1	1.7164	2.65087	0.627085	0.136834	0.990729
ENST00000417267.1	5.1398	6.03097	0.230675	0.564609	0.990729
ENST00000417273.1	2.66536	3.79022	0.507949	0.346751	0.990729
ENST00000417284.1	3.88164	4.61265	0.248931	0.68913	0.990729
ENST00000417298.1	5.67286	5.99954	0.0807738	0.742962	0.990729
ENST00000417299.1	3.01689	2.97904	-0.018217	0.901967	0.990789
ENST00000417315.1	4.59551	1.7313	-1.40837	0.0756976	0.990729
ENST00000417333.2	5.65059	5.1895	-0.122805	0.874247	0.990789
ENST00000417335.1	6.77229	6.02001	-0.169879	0.513879	0.990729
ENST00000417346.1	9.15949	8.15004	-0.168461	0.347558	0.990729
ENST00000417355.1	9.21055	6.83964	-0.429366	0.337678	0.990729
ENST00000417359.1	6.3549	5.61425	-0.178778	0.545995	0.990729
ENST00000417383.1	5.05187	4.52801	-0.157943	0.743801	0.990729
ENST00000417384.1	4.29321	5.36569	0.321706	0.379564	0.990729
ENST00000417385.1	2.51803	4.54873	0.853165	0.233834	0.990729
ENST00000417390.1	2.35096	4.55825	0.955229	0.0359994	0.990729
ENST00000417401.1	4.46932	7.98879	0.837923	0.0515533	0.990729
ENST00000417409.1	2.31731	3.61487	0.641494	0.260387	0.990729
ENST00000417420.1	8.23128	6.38937	-0.365443	0.236324	0.990729
ENST00000417422.1	2.52065	1.69793	-0.570017	0.412641	0.990729
ENST00000417426.1	0.932054	3.4869	1.90346	0.0102245	0.826486
ENST00000417443.2	7.35281	7.32571	-0.00532859	0.75255	0.990789
ENST00000417447.1	4.52457	6.18167	0.450215	0.346751	0.990729
ENST00000417456.1	4.64724	4.89008	0.0734824	0.605071	0.990729
ENST00000417460.1	6.42892	6.65677	0.0502453	0.892439	0.990789
ENST00000417463.1	2.75647	2.00594	-0.45854	0.386315	0.990729
ENST00000417465.1	4.61271	6.77926	0.555513	0.313623	0.990729
ENST00000417476.1	3.61364	5.4902	0.603405	0.276467	0.990729
ENST00000417479.1	4.61221	4.962	0.105462	0.772512	0.990789
ENST00000417481.1	5.56271	5.53126	-0.00818103	0.979377	0.996332
ENST00000417483.1	4.38752	4.45943	0.0234528	0.954473	0.992716
ENST00000417485.2	3.90593	3.73933	-0.0628901	0.873712	0.990789
ENST00000417506.1	5.44123	4.48775	-0.277941	0.147454	0.990729
ENST00000417513.1	5.34866	7.58207	0.503414	0.310193	0.990729
ENST00000417514.1	5.90636	5.83422	-0.0177283	0.941573	0.990789
ENST00000417516.1	9.60074	6.61189	-0.538082	0.238644	0.990729
ENST00000417522.1	12.4207	10.6681	-0.219436	0.638189	0.990729
ENST00000417539.1	6.86766	5.18896	-0.404373	0.244536	0.990729
ENST00000417542.1	1.91022	3.02659	0.663957	0.286055	0.990729
ENST00000417557.1	6.31745	5.0757	-0.315737	0.109594	0.990729
ENST00000417563.1	2.74341	4.09471	0.577795	0.453826	0.990729
ENST00000417565.1	4.73677	5.67839	0.261576	0.621144	0.990729
ENST00000417576.2	8.34226	6.69575	-0.317193	0.183049	0.990729
ENST00000417577.2	2.32103	2.42191	0.0613808	0.888031	0.990789
ENST00000417591.1	2.98353	3.23995	0.118947	0.689288	0.990729
ENST00000417605.1	7.28979	5.03296	-0.534471	0.160694	0.990729
ENST00000417609.1	7.68098	8.80059	0.196309	0.644245	0.990729
ENST00000417624.1	4.8079	4.42716	-0.119025	0.742682	0.990729
ENST00000417630.1	6.61543	7.47321	0.175894	0.760668	0.990789
ENST00000417636.1	3.05431	3.4888	0.191881	0.677032	0.990729
ENST00000417638.1	1.76351	1.91524	0.119074	0.774102	0.990789
ENST00000417643.1	6.04304	3.67097	-0.719113	0.0688725	0.990729
ENST00000417644.1	4.74198	4.74672	0.00144137	0.877812	0.990789
ENST00000417650.1	6.19139	4.91541	-0.332953	0.537018	0.990729
ENST00000417654.1	3.08398	2.28948	-0.429775	0.490551	0.990729
ENST00000417659.1	5.02335	3.51565	-0.51486	0.319894	0.990729
ENST00000417672.1	3.88899	3.59001	-0.115409	0.885283	0.990789
ENST00000417691.1	5.92002	6.44773	0.12319	0.677683	0.990729
ENST00000417692.1	3.92785	3.74437	-0.0690188	0.991029	0.996967
ENST00000417695.1	7.60359	7.08991	-0.100914	0.659455	0.990729
ENST00000417705.1	6.20341	6.24027	0.00854639	0.972135	0.994747
ENST00000417715.1	1.38936	1.78106	0.35832	0.610283	0.990729
ENST00000417765.1	5.4562	4.15301	-0.39374	0.23206	0.990729
ENST00000417781.1	5.79136	6.82776	0.237509	0.541236	0.990729
ENST00000417782.1	2.91141	5.78266	0.990016	0.0418931	0.990729
ENST00000417786.1	9.82192	9.86267	0.00597392	0.817555	0.990789
ENST00000417792.1	7.1003	5.53458	-0.359407	0.457457	0.990729
ENST00000417794.1	4.98849	6.05531	0.279598	0.549889	0.990729
ENST00000417795.1	5.37498	6.89381	0.359043	0.132778	0.990729
ENST00000417798.2	6.03256	4.80762	-0.327449	0.43856	0.990729
ENST00000417800.1	3.43352	5.37657	0.646997	0.309119	0.990729
ENST00000417801.1	3.75637	4.9843	0.408053	0.443665	0.990729
ENST00000417820.1	5.93523	5.98137	0.0111708	0.956514	0.992716
ENST00000417838.1	3.77749	3.20403	-0.237539	0.737714	0.990729
ENST00000417843.2	7.36808	8.12162	0.140477	0.326748	0.990729
ENST00000417844.1	1.88258	2.41429	0.358888	0.453826	0.990729
ENST00000417869.1	7.21303	5.05985	-0.511511	0.225127	0.990729
ENST00000417881.2	4.63511	3.88876	-0.253294	0.263836	0.990729
ENST00000417884.1	4.42246	5.34064	0.272163	0.516251	0.990729
ENST00000417897.1	3.9051	2.60905	-0.581838	0.392224	0.990729
ENST00000417917.1	7.47103	4.91816	-0.603188	0.0806339	0.990729
ENST00000417926.1	1.09044	0.649746	-0.746962	0.139034	0.990729
ENST00000417930.1	4.7165	2.19663	-1.10242	0.227318	0.990729
ENST00000417932.1	3.70307	3.1301	-0.242514	0.488187	0.990729
ENST00000417947.1	7.65573	7.77135	0.0216262	0.971057	0.994747
ENST00000417957.1	10.1357	6.95989	-0.542309	0.131653	0.990729
ENST00000417964.1	9.8888	9.06757	-0.125078	0.640402	0.990729
ENST00000417968.4	2.8842	2.95786	0.0363813	0.85785	0.990789
ENST00000417969.1	6.46797	5.23606	-0.304832	0.600914	0.990729
ENST00000417975.1	2.89484	3.30174	0.189748	0.405049	0.990729
ENST00000417987.1	8.10833	5.42781	-0.579034	0.169994	0.990729
ENST00000418001.1	7.45413	7.30083	-0.02998	0.94444	0.991535
ENST00000418015.1	6.03988	6.72133	0.154227	0.510204	0.990729
ENST00000418025.1	3.68141	5.23001	0.506555	0.347886	0.990729
ENST00000418029.1	5.82463	5.02482	-0.213095	0.631499	0.990729
ENST00000418031.1	4.93241	6.60368	0.420978	0.293861	0.990729
ENST00000418049.1	3.33046	4.58479	0.461134	0.682101	0.990729
ENST00000418050.1	9.49359	7.92424	-0.260682	0.20923	0.990729
ENST00000418076.1	4.54518	3.64186	-0.319662	0.600914	0.990729
ENST00000418078.2	2.84749	3.90468	0.455511	0.443665	0.990729
ENST00000418080.1	4.91082	3.392	-0.533828	0.311231	0.990729
ENST00000418091.1	3.22934	2.15568	-0.583095	0.536246	0.990729
ENST00000418106.1	8.41621	8.39278	-0.0040228	0.990013	0.996967
ENST00000418134.1	4.1117	5.89824	0.52055	0.22531	0.990729
ENST00000418165.1	3.63068	4.67549	0.364878	0.409938	0.990729
ENST00000418192.1	6.02969	7.63821	0.34115	0.60849	0.990729
ENST00000418196.2	2.06735	3.58284	0.793324	0.561458	0.990729
ENST00000418204.1	3.88892	4.94772	0.347392	0.550033	0.990729
ENST00000418209.1	8.41957	5.36548	-0.650039	0.19548	0.990729
ENST00000418215.1	1.6538	2.89958	0.810057	0.20572	0.990729
ENST00000418238.1	2.97458	3.70693	0.317539	0.774102	0.990789
ENST00000418242.1	6.40524	7.25354	0.179433	0.823479	0.990789
ENST00000418244.1	8.64179	6.5663	-0.396248	0.153465	0.990729
ENST00000418254.2	6.48203	6.5348	0.0116968	0.942578	0.990789
ENST00000418255.1	7.50022	6.01335	-0.318765	0.310655	0.990729
ENST00000418270.1	3.25416	6.58141	1.01611	0.0970417	0.990729
ENST00000418271.1	7.47225	10.074	0.43102	0.207117	0.990729
ENST00000418273.2	7.131	7.7265	0.115711	0.644697	0.990729
ENST00000418292.1	4.83442	5.63499	0.221072	0.904196	0.990789
ENST00000418297.1	1.69136	3.02087	0.836779	0.286055	0.990729
ENST00000418300.1	7.95642	5.2039	-0.612526	0.268028	0.990729
ENST00000418330.1	9.61321	6.96725	-0.464428	0.2178	0.990729
ENST00000418335.1	5.99266	5.94369	-0.0118352	0.834992	0.990789
ENST00000418343.2	4.49653	5.42729	0.271423	0.372364	0.990729
ENST00000418344.1	3.70757	4.00666	0.111925	0.687684	0.990729
ENST00000418348.1	3.09579	6.11623	0.982332	0.029867	0.990729
ENST00000418353.1	4.71926	2.87589	-0.714548	0.130382	0.990729
ENST00000418358.1	6.65693	6.27205	-0.0859222	0.710513	0.990729
ENST00000418362.1	6.52759	5.96482	-0.130072	0.635801	0.990729
ENST00000418369.1	6.41219	5.90231	-0.119536	0.824753	0.990789
ENST00000418387.1	1.72783	2.36462	0.452644	0.464045	0.990729
ENST00000418393.1	3.89206	5.17347	0.410599	0.315242	0.990729
ENST00000418395.1	2.33369	3.54026	0.601243	0.373672	0.990729
ENST00000418399.1	6.41329	6.72537	0.068549	0.911209	0.990789
ENST00000418400.1	3.89848	3.80925	-0.0334038	0.851754	0.990789
ENST00000418402.1	3.40534	4.77435	0.487505	0.554361	0.990729
ENST00000418403.1	4.37414	4.3783	0.00137059	0.96281	0.99464
ENST00000418409.1	5.37934	3.98718	-0.432062	0.275886	0.990729
ENST00000418415.1	5.71007	4.22934	-0.433077	0.352287	0.990729
ENST00000418416.1	1.66602	1.79807	0.110045	0.847172	0.990789
ENST00000418426.1	3.49382	3.03183	-0.204618	0.737714	0.990729
ENST00000418428.2	3.35004	2.72953	-0.295524	0.376091	0.990729
ENST00000418430.1	4.84706	4.75004	-0.0291718	0.904331	0.990789
ENST00000418442.1	6.40123	5.14875	-0.314126	0.376091	0.990729
ENST00000418451.1	3.258	4.52262	0.473174	0.453826	0.990729
ENST00000418467.2	5.73194	5.33917	-0.102406	0.840374	0.990789
ENST00000418471.1	8.33156	5.21758	-0.675205	0.0222916	0.974252
ENST00000418474.1	7.4234	5.601	-0.406395	0.100475	0.990729
ENST00000418478.1	1.77332	2.36818	0.417327	0.649516	0.990729
ENST00000418481.1	4.00932	4.60614	0.200197	0.904196	0.990789
ENST00000418499.3	29.5014	20.8077	-0.503664	2.43e-12	4.73e-09
ENST00000418515.1	3.93056	4.40099	0.163097	0.794389	0.990789
ENST00000418518.2	6.66547	7.6132	0.191795	0.616727	0.990729
ENST00000418523.1	11.6929	9.14947	-0.353879	0.244536	0.990729
ENST00000418524.2	5.02346	5.53294	0.139367	0.700978	0.990729
ENST00000418525.1	6.68783	7.84005	0.229323	0.549377	0.990729
ENST00000418534.2	4.71261	5.35308	0.183843	0.516251	0.990729
ENST00000418566.1	12.1401	10.8296	-0.164802	0.643886	0.990729
ENST00000418567.1	4.60746	4.97607	0.111037	0.86452	0.990789
ENST00000418571.2	3.85216	3.48192	-0.145781	0.741235	0.990729
ENST00000418574.3	2.58778	2.36084	-0.132412	0.726334	0.990729
ENST00000418579.1	9.65333	8.94429	-0.11006	0.889213	0.990789
ENST00000418585.1	4.54546	4.00313	-0.183298	0.631499	0.990729
ENST00000418591.1	4.04252	4.18955	0.0515404	0.790764	0.990789
ENST00000418598.1	4.62753	6.51136	0.492719	0.554361	0.990729
ENST00000418607.2	11.075	12.0613	0.123077	0.854472	0.990789
ENST00000418615.1	5.24266	4.36329	-0.264884	0.620206	0.990729
ENST00000418618.1	7.96138	8.67708	0.124192	0.510204	0.990729
ENST00000418620.1	7.69257	9.05629	0.235455	0.564609	0.990729
ENST00000418621.1	1.74574	7.47105	2.09748	0.000215236	0.136712
ENST00000418652.2	3.4106	2.46882	-0.466201	0.311231	0.990729
ENST00000418656.1	8.46276	6.76601	-0.322823	0.32441	0.990729
ENST00000418660.1	5.26295	7.46549	0.504367	0.237037	0.990729
ENST00000418662.1	8.12901	6.50883	-0.320681	0.352652	0.990729
ENST00000418666.2	3.00179	1.98765	-0.594757	0.311231	0.990729
ENST00000418679.1	3.76546	4.46974	0.247366	0.650599	0.990729
ENST00000418690.1	6.34308	6.13103	-0.0490535	0.990013	0.996967
ENST00000418699.1	3.75266	4.68063	0.31879	0.209508	0.990729
ENST00000418729.1	5.11298	5.02874	-0.023966	0.990412	0.996967
ENST00000418739.1	4.60496	4.00837	-0.200173	0.641996	0.990729
ENST00000418741.1	1.78912	3.69645	1.04689	0.101266	0.990729
ENST00000418743.1	7.97423	7.39342	-0.109104	0.797304	0.990789
ENST00000418747.1	6.2316	6.70283	0.105169	0.505047	0.990729
ENST00000418758.2	5.47025	5.92674	0.11563	0.603737	0.990729
ENST00000418764.2	3.28519	4.77312	0.538954	0.260387	0.990729
ENST00000418770.1	4.11909	4.93141	0.259674	0.652388	0.990729
ENST00000418775.1	2.45538	3.14642	0.357766	0.652388	0.990729
ENST00000418803.1	6.21044	7.73083	0.315927	0.390474	0.990729
ENST00000418813.2	3.40241	2.59646	-0.390012	0.600914	0.990729
ENST00000418818.2	5.32392	4.72545	-0.172036	0.626583	0.990729
ENST00000418821.2	6.82578	7.12491	0.0618758	0.821256	0.990789
ENST00000418834.1	2.6827	3.39819	0.34108	0.347886	0.990729
ENST00000418836.2	5.38896	5.69095	0.0786626	0.913822	0.990789
ENST00000418837.1	5.24705	4.90904	-0.0960656	0.732045	0.990729
ENST00000418839.2	7.05818	6.5639	-0.104742	0.549832	0.990729
ENST00000418848.1	3.60247	2.13992	-0.751428	0.181823	0.990729
ENST00000418850.1	3.87901	4.55169	0.230712	0.591769	0.990729
ENST00000418874.1	4.13457	4.62456	0.16158	0.63149	0.990729
ENST00000418907.1	3.02438	5.88446	0.960273	0.0257695	0.974252
ENST00000418923.2	5.138	5.32968	0.0528413	0.868547	0.990789
ENST00000418925.1	4.35079	6.23073	0.518122	0.352671	0.990729
ENST00000418927.1	6.56046	5.07627	-0.370027	0.314262	0.990729
ENST00000418941.1	5.83014	6.33806	0.120511	0.712151	0.990729
ENST00000418942.1	3.46721	3.84578	0.149502	0.74813	0.990789
ENST00000418945.1	5.48456	5.91622	0.109302	0.730942	0.990729
ENST00000418953.1	7.4584	7.25857	-0.0391813	0.845953	0.990789
ENST00000418954.1	4.31335	5.73308	0.4105	0.315242	0.990729
ENST00000418957.1	7.29751	5.51762	-0.403356	0.314262	0.990729
ENST00000418968.3	3.05463	4.13636	0.437366	0.0391251	0.990729
ENST00000418972.1	6.66628	4.99397	-0.416695	0.395922	0.990729
ENST00000418995.2	9.39446	8.47476	-0.148637	0.737229	0.990729
ENST00000419003.2	6.79574	5.19255	-0.388187	0.227436	0.990729
ENST00000419013.1	6.58638	4.24438	-0.633932	0.0757024	0.990729
ENST00000419027.1	20.4887	15.4581	-0.406463	0.031545	0.990729
ENST00000419028.2	4.76785	5.24632	0.137968	0.89712	0.990789
ENST00000419029.1	4.08674	3.17056	-0.366213	0.444948	0.990729
ENST00000419034.1	7.72731	6.64545	-0.217599	0.626583	0.990729
ENST00000419035.1	4.88108	4.92108	0.0117768	0.918464	0.990789
ENST00000419061.1	2.23592	2.92009	0.385147	0.682101	0.990729
ENST00000419064.2	3.32915	2.78689	-0.256494	0.565749	0.990729
ENST00000419100.1	5.01293	4.44563	-0.173267	0.611888	0.990729
ENST00000419103.1	4.40222	4.1168	-0.0967095	0.864132	0.990789
ENST00000419128.1	9.35867	11.38	0.282128	0.353803	0.990729
ENST00000419129.1	4.3353	4.81183	0.150453	0.878612	0.990789
ENST00000419134.1	3.19092	5.6545	0.825428	0.260387	0.990729
ENST00000419151.2	6.06958	5.43764	-0.158614	0.870785	0.990789
ENST00000419160.3	8.45476	9.18436	0.119415	0.707909	0.990729
ENST00000419190.1	8.83168	9.51538	0.107575	0.638702	0.990729
ENST00000419196.1	7.83009	9.96739	0.348188	0.436811	0.990729
ENST00000419207.2	5.56736	2.51743	-1.14504	0.00976185	0.826486
ENST00000419211.1	2.27501	2.57599	0.179252	0.68913	0.990729
ENST00000419220.1	4.4745	4.59947	0.0397403	0.967388	0.994747
ENST00000419223.1	4.06689	3.60335	-0.17459	0.739725	0.990729
ENST00000419225.1	10.3133	6.85975	-0.588272	0.0989439	0.990729
ENST00000419226.1	3.99282	5.20762	0.383216	0.310193	0.990729
ENST00000419243.1	4.02114	4.86927	0.2761	0.473962	0.990729
ENST00000419244.2	4.58081	3.42977	-0.417491	0.395922	0.990729
ENST00000419251.1	3.45578	3.82557	0.146666	0.774102	0.990789
ENST00000419264.1	3.18343	4.15963	0.385873	0.506004	0.990729
ENST00000419296.1	0.689767	0.393081	-0.811283	0.319894	0.990729
ENST00000419326.1	5.30527	6.24789	0.235943	0.722848	0.990729
ENST00000419347.1	9.31483	8.4886	-0.134002	0.641996	0.990729
ENST00000419353.2	5.41196	4.4475	-0.283157	0.509574	0.990729
ENST00000419359.1	4.93272	3.0723	-0.683066	0.164543	0.990729
ENST00000419361.1	5.45892	5.28536	-0.0466125	0.854745	0.990789
ENST00000419362.1	5.75357	6.51772	0.179909	0.376117	0.990729
ENST00000419373.2	4.74101	4.43807	-0.0952605	0.564971	0.990729
ENST00000419382.1	2.21198	3.204	0.534534	0.352671	0.990729
ENST00000419400.1	4.74647	6.3361	0.41674	0.427207	0.990729
ENST00000419415.1	4.11346	5.56416	0.43581	0.310193	0.990729
ENST00000419422.1	5.95618	5.96796	0.00284991	0.925381	0.990789
ENST00000419425.1	3.91127	3.78272	-0.0482122	0.877812	0.990789
ENST00000419428.1	5.36728	5.10353	-0.0726984	0.874247	0.990789
ENST00000419440.1	6.90126	6.87739	-0.0049981	0.943043	0.990789
ENST00000419441.1	1.77449	2.71097	0.611408	0.521933	0.990729
ENST00000419446.1	6.55097	6.77707	0.0489526	0.967388	0.994747
ENST00000419463.1	3.71075	6.22328	0.745961	0.0422682	0.990729
ENST00000419467.1	5.87573	5.51977	-0.0901602	0.631499	0.990729
ENST00000419511.1	6.15242	6.41798	0.0609664	0.809384	0.990789
ENST00000419531.2	6.84619	6.05369	-0.177488	0.505844	0.990729
ENST00000419576.1	17.5321	17.021	-0.0426864	0.783012	0.990789
ENST00000419578.1	1.69357	1.92825	0.187226	0.541236	0.990729
ENST00000419596.1	5.18017	6.00951	0.214249	0.528902	0.990729
ENST00000419604.1	3.65369	3.56699	-0.034648	0.96281	0.99464
ENST00000419609.1	1.69696	1.67985	-0.0146212	0.888031	0.990789
ENST00000419613.1	7.41061	6.12181	-0.275635	0.515325	0.990729
ENST00000419614.1	1.42645	2.00123	0.488462	0.441076	0.990729
ENST00000419620.1	4.25385	5.30025	0.31729	0.550033	0.990729
ENST00000419624.1	9.45665	7.90495	-0.258574	0.482375	0.990729
ENST00000419628.1	7.07473	6.63814	-0.0918955	0.610119	0.990729
ENST00000419640.1	4.11001	4.86804	0.244197	0.586429	0.990729
ENST00000419643.1	7.31501	10.1695	0.475313	0.042142	0.990729
ENST00000419644.1	9.16843	7.1719	-0.35432	0.394506	0.990729
ENST00000419658.1	3.28807	2.4026	-0.452642	0.536246	0.990729
ENST00000419662.1	8.59521	9.85208	0.196894	0.586322	0.990729
ENST00000419664.1	5.81924	6.27161	0.108006	0.804537	0.990789
ENST00000419666.2	1.64108	2.66166	0.697679	0.390396	0.990729
ENST00000419667.2	10.5077	8.53809	-0.299458	0.402178	0.990729
ENST00000419668.1	6.93862	5.73979	-0.273649	0.376091	0.990729
ENST00000419680.2	4.98356	4.06588	-0.293607	0.537018	0.990729
ENST00000419694.1	4.39546	3.26846	-0.427406	0.2178	0.990729
ENST00000419695.1	8.1949	9.14707	0.158583	0.582353	0.990729
ENST00000419702.1	2.28304	2.49905	0.130418	0.682101	0.990729
ENST00000419703.1	2.3141	3.5415	0.613909	0.373672	0.990729
ENST00000419707.2	3.1906	5.05455	0.663755	0.346751	0.990729
ENST00000419709.1	3.99404	4.93471	0.305115	0.605068	0.990729
ENST00000419713.1	3.7405	4.11304	0.136978	0.733108	0.990729
ENST00000419719.1	2.95832	3.70555	0.324912	0.68913	0.990729
ENST00000419733.1	5.13933	5.99149	0.221337	0.85785	0.990789
ENST00000419734.1	8.92037	4.45962	-1.00018	0.0358524	0.990729
ENST00000419736.1	5.23607	4.59543	-0.188285	0.641996	0.990729
ENST00000419738.1	4.71253	4.55171	-0.0500916	0.611741	0.990729
ENST00000419777.1	5.26468	3.94597	-0.415966	0.345245	0.990729
ENST00000419779.1	3.97614	2.63377	-0.594241	0.444948	0.990729
ENST00000419784.1	3.01623	2.86585	-0.0737862	0.743853	0.990729
ENST00000419786.1	2.09474	3.13979	0.583896	0.175549	0.990729
ENST00000419795.1	2.42534	1.02825	-1.238	0.227318	0.990729
ENST00000419796.1	3.86131	3.2436	-0.251496	0.626583	0.990729
ENST00000419800.1	6.35339	6.88365	0.115648	0.885794	0.990789
ENST00000419801.1	4.36749	5.67805	0.378592	0.408944	0.990729
ENST00000419808.1	5.2122	5.69231	0.127124	0.690268	0.990729
ENST00000419809.1	4.1395	2.04645	-1.01633	0.456941	0.990729
ENST00000419814.1	0.689905	0.412987	-0.7403	0.319894	0.990729
ENST00000419815.1	6.47347	3.7257	-0.797027	0.102232	0.990729
ENST00000419817.1	5.41855	5.1436	-0.0751311	0.91746	0.990789
ENST00000419824.1	3.42034	3.42015	-7.89e-05	0.971774	0.994747
ENST00000419826.2	5.06323	8.26225	0.706478	0.0428565	0.990729
ENST00000419832.1	2.49355	2.06726	-0.270483	0.721418	0.990729
ENST00000419836.1	5.74528	5.35885	-0.100454	0.611888	0.990729
ENST00000419846.1	9.001	7.30741	-0.300726	0.477346	0.990729
ENST00000419853.1	5.19205	4.81521	-0.108706	0.513984	0.990729
ENST00000419860.1	3.7601	5.78189	0.620771	0.208471	0.990729
ENST00000419863.1	3.07146	1.99801	-0.620357	0.410722	0.990729
ENST00000419865.2	7.23673	5.61732	-0.365455	0.0961548	0.990729
ENST00000419883.1	3.49207	2.82628	-0.305176	0.600914	0.990729
ENST00000419889.1	3.65487	2.45166	-0.576059	0.565749	0.990729
ENST00000419891.1	3.47565	6.88033	0.985198	0.0680133	0.990729
ENST00000419895.3	3.17525	2.99256	-0.0854923	0.810492	0.990789
ENST00000419897.1	3.72528	3.7117	-0.00526934	0.96281	0.99464
ENST00000419899.1	1.23676	2.26361	0.872065	0.286055	0.990729
ENST00000419902.1	5.67825	5.10433	-0.153725	0.643589	0.990729
ENST00000419904.1	3.66673	2.49103	-0.557755	0.319894	0.990729
ENST00000419905.1	4.36953	5.42326	0.311681	0.461814	0.990729
ENST00000419921.1	5.73131	6.44022	0.168246	0.716787	0.990729
ENST00000419926.1	3.02111	3.30138	0.12799	0.644245	0.990729
ENST00000419931.1	7.09797	5.62498	-0.335559	0.453247	0.990729
ENST00000419944.1	4.25974	3.63674	-0.228121	0.389204	0.990729
ENST00000419952.1	5.43985	3.22331	-0.755026	0.174705	0.990729
ENST00000419957.2	3.71044	4.28523	0.207783	0.362813	0.990729
ENST00000419983.1	4.5535	6.22437	0.450951	0.310193	0.990729
ENST00000419993.1	7.30998	6.09206	-0.262938	0.453247	0.990729
ENST00000420000.2	5.54134	4.08147	-0.441145	0.426675	0.990729
ENST00000420016.1	5.39016	4.25774	-0.340242	0.32953	0.990729
ENST00000420020.1	2.79811	1.84339	-0.602095	0.319894	0.990729
ENST00000420038.1	4.89497	4.55345	-0.10434	0.638189	0.990729
ENST00000420044.1	1.27558	3.18409	1.31973	0.0962293	0.990729
ENST00000420049.1	5.81879	7.67266	0.399008	0.394525	0.990729
ENST00000420059.1	7.23638	6.26908	-0.207015	0.633517	0.990729
ENST00000420071.1	2.74373	4.59188	0.742947	0.213886	0.990729
ENST00000420080.1	9.74997	8.69073	-0.16592	0.326905	0.990729
ENST00000420082.1	2.82903	3.90171	0.463797	0.409938	0.990729
ENST00000420091.1	4.9214	4.65884	-0.079098	0.773408	0.990789
ENST00000420096.2	5.85971	8.58823	0.551531	0.148253	0.990729
ENST00000420118.1	7.87802	6.16432	-0.35389	0.448716	0.990729
ENST00000420130.1	7.48255	7.98096	0.0930318	0.863084	0.990789
ENST00000420134.1	2.24652	2.26951	0.0146883	0.888031	0.990789
ENST00000420146.2	2.68543	4.03285	0.586647	0.309119	0.990729
ENST00000420153.1	8.58812	8.81734	0.0380007	0.942643	0.990789
ENST00000420156.2	6.45595	7.71762	0.257527	0.621144	0.990729
ENST00000420160.1	3.60573	2.34548	-0.620408	0.210115	0.990729
ENST00000420161.1	5.42622	7.27805	0.423606	0.223446	0.990729
ENST00000420168.1	7.09502	7.22063	0.0253185	0.973254	0.994911
ENST00000420172.1	5.90806	6.65307	0.171337	0.550033	0.990729
ENST00000420180.1	11.8481	8.9739	-0.400849	0.426675	0.990729
ENST00000420184.1	4.06883	6.65236	0.709251	0.163408	0.990729
ENST00000420185.1	6.61013	4.29684	-0.621401	0.0129146	0.877996
ENST00000420186.2	2.75936	2.40171	-0.200277	0.389204	0.990729
ENST00000420187.1	3.80166	5.24797	0.465127	0.331097	0.990729
ENST00000420204.1	3.23709	3.21898	-0.00809162	0.916694	0.990789
ENST00000420211.1	5.61165	6.18014	0.139215	0.794389	0.990789
ENST00000420213.1	5.5269	5.61169	0.0219642	0.951991	0.992716
ENST00000420221.1	4.32169	3.83363	-0.172886	0.721418	0.990729
ENST00000420225.1	7.22661	6.03502	-0.259961	0.477346	0.990729
ENST00000420237.1	4.63103	3.19833	-0.534014	0.149778	0.990729
ENST00000420245.1	3.02726	3.06464	0.0177044	0.86933	0.990789
ENST00000420251.1	3.33502	2.73488	-0.286221	0.231455	0.990729
ENST00000420253.1	4.99029	5.33724	0.0969724	0.913822	0.990789
ENST00000420268.1	6.14803	4.01164	-0.615931	0.174705	0.990729
ENST00000420272.2	6.51836	7.18209	0.139895	0.621042	0.990729
ENST00000420273.1	5.62892	7.49309	0.412701	0.223446	0.990729
ENST00000420285.1	6.97408	6.40194	-0.123493	0.870785	0.990789
ENST00000420293.1	3.97673	5.35982	0.430603	0.464045	0.990729
ENST00000420315.1	2.5792	4.96784	0.945691	0.140084	0.990729
ENST00000420330.1	5.33135	4.52289	-0.237257	0.233312	0.990729
ENST00000420335.1	6.71561	5.54415	-0.276553	0.525248	0.990729
ENST00000420347.1	6.06158	6.39783	0.0778899	0.901967	0.990789
ENST00000420354.1	6.103	6.16569	0.0147432	0.972924	0.994747
ENST00000420356.1	4.99551	5.02797	0.00934263	0.845953	0.990789
ENST00000420365.1	3.40876	4.38867	0.364535	0.352671	0.990729
ENST00000420382.1	3.37397	3.39004	0.00685835	0.931145	0.990789
ENST00000420389.1	9.08847	7.09978	-0.356262	0.345569	0.990729
ENST00000420391.1	10.31	5.91297	-0.802085	0.1671	0.990729
ENST00000420395.1	7.5565	5.26455	-0.52141	0.195947	0.990729
ENST00000420403.1	2.5021	3.1686	0.340702	0.733924	0.990729
ENST00000420404.1	7.04313	6.20601	-0.18255	0.568512	0.990729
ENST00000420417.3	2.67682	2.1551	-0.312764	0.565749	0.990729
ENST00000420418.1	6.14637	4.02808	-0.609643	0.19339	0.990729
ENST00000420427.1	4.77502	4.80398	0.00872487	0.929047	0.990789
ENST00000420431.2	7.48656	6.2575	-0.258717	0.471603	0.990729
ENST00000420449.1	7.59612	5.31822	-0.514318	0.375719	0.990729
ENST00000420462.1	5.95599	7.21883	0.277422	0.48893	0.990729
ENST00000420465.1	3.8149	5.74216	0.589948	0.079321	0.990729
ENST00000420498.1	3.19851	5.65563	0.822288	0.100582	0.990729
ENST00000420508.1	8.0633	8.04495	-0.00328605	0.831547	0.990789
ENST00000420509.1	3.19333	5.44397	0.7696	0.0750114	0.990729
ENST00000420522.1	4.67539	4.96242	0.0859572	0.929047	0.990789
ENST00000420537.1	3.99164	2.35569	-0.76083	0.1671	0.990729
ENST00000420548.1	3.05746	2.72722	-0.164903	0.870785	0.990789
ENST00000420549.1	3.8474	5.01856	0.383391	0.310193	0.990729
ENST00000420563.1	3.56223	4.70504	0.401427	0.150674	0.990729
ENST00000420572.2	1.89876	3.93542	1.05146	0.0258258	0.974252
ENST00000420579.1	5.17613	3.66639	-0.497515	0.259653	0.990729
ENST00000420585.1	5.43379	5.94965	0.130846	0.885796	0.990789
ENST00000420594.1	5.10288	5.3454	0.0669876	0.85785	0.990789
ENST00000420595.2	4.35112	3.42993	-0.343207	0.352287	0.990729
ENST00000420597.1	22.8965	24.8193	0.116337	0.824557	0.990789
ENST00000420598.1	3.50076	3.96158	0.178405	0.85785	0.990789
ENST00000420601.1	10.2372	9.1369	-0.164047	0.641253	0.990729
ENST00000420615.1	3.26902	1.97591	-0.72634	0.490551	0.990729
ENST00000420644.1	2.79217	4.26789	0.612134	0.256712	0.990729
ENST00000420648.2	2.15758	2.94065	0.446724	0.682101	0.990729
ENST00000420659.1	7.44045	5.50613	-0.43435	0.283269	0.990729
ENST00000420672.1	4.91084	4.94109	0.00885952	0.870785	0.990789
ENST00000420693.1	1.62187	3.16812	0.965968	0.310801	0.990729
ENST00000420695.1	10.5927	7.67781	-0.464306	0.165859	0.990729
ENST00000420701.1	2.43229	3.64042	0.581789	0.421924	0.990729
ENST00000420705.1	10.19	7.45554	-0.450773	0.364984	0.990729
ENST00000420710.1	9.64852	5.64236	-0.77401	0.0420799	0.990729
ENST00000420721.2	2.93829	3.63564	0.307237	0.68913	0.990729
ENST00000420724.1	11.6959	12.4203	0.0867036	0.593881	0.990729
ENST00000420726.1	4.32155	4.92546	0.188708	0.628451	0.990729
ENST00000420748.1	6.99008	3.8393	-0.864465	0.0385736	0.990729
ENST00000420758.1	3.05748	4.00006	0.38768	0.58795	0.990729
ENST00000420759.1	1.89006	3.76403	0.993845	0.310801	0.990729
ENST00000420760.1	4.07432	4.80409	0.237706	0.733924	0.990729
ENST00000420762.1	4.44085	6.38106	0.522959	0.427207	0.990729
ENST00000420766.1	2.17874	3.27107	0.58627	0.247953	0.990729
ENST00000420774.1	4.17128	5.98508	0.520882	0.28003	0.990729
ENST00000420776.1	4.80246	5.44435	0.180983	0.604513	0.990729
ENST00000420801.1	7.67582	4.34507	-0.820941	0.139034	0.990729
ENST00000420803.1	6.98216	6.62649	-0.075428	0.895831	0.990789
ENST00000420811.2	7.45038	4.39708	-0.760768	0.0477372	0.990729
ENST00000420819.2	4.63159	4.09615	-0.17724	0.600914	0.990729
ENST00000420823.1	2.7237	3.36046	0.303087	0.17762	0.990729
ENST00000420825.1	4.93685	5.84636	0.243949	0.578452	0.990729
ENST00000420828.1	2.18659	2.92418	0.41935	0.58795	0.990729
ENST00000420830.1	2.69836	4.0133	0.572706	0.398656	0.990729
ENST00000420845.1	3.22148	3.88443	0.269976	0.650599	0.990729
ENST00000420852.1	7.29791	7.64249	0.0665609	0.878938	0.990789
ENST00000420856.2	9.06179	10.6189	0.228771	0.338152	0.990729
ENST00000420867.1	6.18945	4.31392	-0.520812	0.121752	0.990729
ENST00000420870.1	7.25014	7.1048	-0.0292138	0.829791	0.990789
ENST00000420876.1	5.30734	5.89788	0.152209	0.772512	0.990789
ENST00000420877.1	5.40009	4.66502	-0.211099	0.347103	0.990729
ENST00000420883.1	7.92009	6.03678	-0.391737	0.163674	0.990729
ENST00000420901.1	2.79539	4.79262	0.777768	0.192416	0.990729
ENST00000420902.1	5.42622	4.61134	-0.234763	0.287243	0.990729
ENST00000420905.1	26.0342	37.5501	0.528411	2.22e-16	1.3e-12
ENST00000420912.1	5.45929	4.91005	-0.152974	0.316812	0.990729
ENST00000420918.2	4.1094	4.81435	0.228415	0.385838	0.990729
ENST00000420941.2	7.30777	5.74396	-0.347386	0.248408	0.990729
ENST00000420945.1	4.27014	3.13103	-0.447644	0.350927	0.990729
ENST00000420946.1	5.54622	6.67753	0.267812	0.578452	0.990729
ENST00000420947.1	3.46422	4.70193	0.440719	0.372747	0.990729
ENST00000420964.1	4.31892	7.58709	0.812875	0.17785	0.990729
ENST00000420981.2	7.40443	8.6047	0.216737	0.424541	0.990729
ENST00000420988.1	2.31174	1.75787	-0.395147	0.412641	0.990729
ENST00000421003.1	6.38636	7.00785	0.133976	0.504479	0.990729
ENST00000421004.3	6.18936	6.22014	0.00715739	0.879963	0.990789
ENST00000421006.1	3.07464	4.8492	0.657329	0.163408	0.990729
ENST00000421019.1	7.59417	5.99517	-0.34109	0.29341	0.990729
ENST00000421020.1	2.72282	3.55008	0.382746	0.518346	0.990729
ENST00000421034.1	5.71734	4.00001	-0.515343	0.350927	0.990729
ENST00000421041.1	6.90301	6.5004	-0.086697	0.851754	0.990789
ENST00000421051.1	5.5861	5.4139	-0.0451738	0.84882	0.990789
ENST00000421055.1	6.73292	6.98596	0.0532261	0.984718	0.996967
ENST00000421064.1	6.03127	6.33842	0.0716638	0.668498	0.990729
ENST00000421067.1	12.1388	8.55524	-0.504752	0.102399	0.990729
ENST00000421071.1	7.88497	5.92255	-0.412887	0.244901	0.990729
ENST00000421077.1	3.88984	3.69591	-0.0737784	0.63036	0.990729
ENST00000421112.1	5.05289	6.45286	0.35283	0.422855	0.990729
ENST00000421114.1	7.6666	6.40182	-0.260105	0.525248	0.990729
ENST00000421121.1	1.88224	3.40177	0.853833	0.0110597	0.848141
ENST00000421122.2	1.88985	1.63843	-0.205955	0.885283	0.990789
ENST00000421132.1	5.91262	5.79671	-0.028562	0.953143	0.992716
ENST00000421142.1	3.60698	5.04723	0.484701	0.313623	0.990729
ENST00000421147.1	6.07733	5.18892	-0.228003	0.626583	0.990729
ENST00000421157.1	4.25868	4.37323	0.0382929	0.896409	0.990789
ENST00000421161.1	6.28458	7.23678	0.203532	0.55071	0.990729
ENST00000421166.1	9.58511	7.59035	-0.336628	0.611888	0.990729
ENST00000421167.1	2.13057	4.64563	1.12463	0.0505223	0.990729
ENST00000421181.1	3.37349	3.73855	0.148241	0.847172	0.990789
ENST00000421185.1	8.51951	5.8483	-0.542752	0.137525	0.990729
ENST00000421190.2	4.77708	4.88889	0.0333757	0.924424	0.990789
ENST00000421202.1	4.15657	4.17823	0.00750013	0.996837	0.999364
ENST00000421206.1	3.32423	4.01916	0.273873	0.774102	0.990789
ENST00000421207.1	4.03702	5.12221	0.343473	0.390474	0.990729
ENST00000421212.1	4.53087	3.84162	-0.238072	0.743108	0.990729
ENST00000421237.1	4.25394	5.09014	0.258907	0.68913	0.990729
ENST00000421252.2	7.82693	4.45957	-0.811542	0.0884953	0.990729
ENST00000421253.1	4.87766	4.32698	-0.17283	0.743547	0.990729
ENST00000421254.1	6.06229	5.26454	-0.203556	0.545995	0.990729
ENST00000421256.1	3.48809	2.09339	-0.7366	0.280065	0.990729
ENST00000421257.1	5.89163	7.09075	0.267272	0.392278	0.990729
ENST00000421261.1	4.75535	3.5051	-0.440097	0.444948	0.990729
ENST00000421273.1	6.85133	6.22118	-0.139197	0.513035	0.990729
ENST00000421275.1	7.23131	7.21408	-0.0034411	0.931145	0.990789
ENST00000421297.1	4.28441	4.49758	0.0700508	0.671105	0.990729
ENST00000421298.1	8.79611	5.94296	-0.565684	0.195947	0.990729
ENST00000421310.1	8.02149	8.82635	0.137947	0.661406	0.990729
ENST00000421315.1	6.0118	6.7721	0.171807	0.270454	0.990729
ENST00000421318.1	4.97261	3.96056	-0.328298	0.606791	0.990729
ENST00000421323.1	4.01806	4.1974	0.0629951	0.997658	0.999364
ENST00000421326.1	6.27827	4.30549	-0.544189	0.259653	0.990729
ENST00000421330.2	3.28316	1.89205	-0.795135	0.3384	0.990729
ENST00000421380.1	10.9108	8.8979	-0.294214	0.409015	0.990729
ENST00000421411.1	3.93002	4.25181	0.113542	0.905674	0.990789
ENST00000421437.1	3.01085	3.47561	0.207098	0.650599	0.990729
ENST00000421447.1	7.11411	9.24673	0.378261	0.209508	0.990729
ENST00000421455.1	5.58813	5.05935	-0.143414	0.643137	0.990729
ENST00000421463.1	5.25583	5.17152	-0.0233316	0.956939	0.992716
ENST00000421465.2	2.48866	3.43443	0.464703	0.453826	0.990729
ENST00000421480.2	6.77194	6.21189	-0.124538	0.732045	0.990729
ENST00000421481.1	8.31057	7.05703	-0.235885	0.465023	0.990729
ENST00000421482.1	6.53491	5.96126	-0.132551	0.870785	0.990789
ENST00000421498.1	2.76059	6.10541	1.14511	0.0712958	0.990729
ENST00000421500.1	4.91042	7.13429	0.538924	0.0746422	0.990729
ENST00000421507.2	3.58436	3.3651	-0.0910651	0.885283	0.990789
ENST00000421509.2	4.03137	6.57628	0.706003	0.125604	0.990729
ENST00000421513.1	5.73399	5.76648	0.00815092	0.840374	0.990789
ENST00000421534.1	7.06454	7.54835	0.0955657	0.677683	0.990729
ENST00000421563.1	6.71929	7.13943	0.0875002	0.849046	0.990789
ENST00000421575.1	2.75634	2.61465	-0.076136	0.901967	0.990789
ENST00000421581.1	4.85077	4.99284	0.0416455	0.943043	0.990789
ENST00000421595.1	2.77802	3.3332	0.262852	0.506004	0.990729
ENST00000421597.1	2.50981	6.29083	1.32567	0.023704	0.974252
ENST00000421604.1	3.38145	4.05879	0.263404	0.56451	0.990729
ENST00000421614.1	5.622	8.13084	0.53232	0.13435	0.990729
ENST00000421616.1	6.69529	8.57606	0.357167	0.196539	0.990729
ENST00000421617.1	4.37455	6.99211	0.676594	0.175549	0.990729
ENST00000421619.1	8.5372	10.6094	0.313513	0.485728	0.990729
ENST00000421624.1	4.39668	4.12179	-0.0931434	0.743911	0.990729
ENST00000421629.2	7.63075	6.33766	-0.267874	0.364939	0.990729
ENST00000421637.1	5.79948	6.65165	0.197787	0.690268	0.990729
ENST00000421640.1	3.38853	2.90606	-0.221596	0.743853	0.990729
ENST00000421642.1	7.40821	5.73677	-0.368885	0.448716	0.990729
ENST00000421645.2	5.20662	5.77834	0.150309	0.642912	0.990729
ENST00000421650.2	11.4771	6.77982	-0.759433	0.233318	0.990729
ENST00000421657.1	5.2207	5.04635	-0.0490009	0.872096	0.990789
ENST00000421692.1	2.72126	1.9711	-0.465277	0.149778	0.990729
ENST00000421696.2	4.46675	7.18605	0.685976	0.0972557	0.990729
ENST00000421730.1	5.74304	6.62546	0.206205	0.508197	0.990729
ENST00000421734.3	3.00411	4.19334	0.481164	0.237258	0.990729
ENST00000421737.1	2.97947	4.95665	0.73431	0.213886	0.990729
ENST00000421759.1	7.13075	7.01956	-0.0226732	0.956514	0.992716
ENST00000421764.1	5.19775	4.19814	-0.308138	0.735079	0.990729
ENST00000421771.1	2.90113	5.1136	0.817723	0.0358768	0.990729
ENST00000421796.2	6.84265	7.44534	0.121783	0.733177	0.990729
ENST00000421806.1	5.60184	4.59808	-0.284871	0.112308	0.990729
ENST00000421820.1	11.6999	9.74127	-0.26432	0.420603	0.990729
ENST00000421825.1	3.75035	3.51388	-0.0939593	0.743168	0.990729
ENST00000421829.1	7.86688	5.58606	-0.493961	0.238644	0.990729
ENST00000421848.1	3.5833	2.40103	-0.577638	0.336323	0.990729
ENST00000421851.1	4.95044	3.74208	-0.403714	0.488187	0.990729
ENST00000421862.1	8.86366	8.94266	0.0128019	0.978377	0.996332
ENST00000421866.1	9.71688	7.09043	-0.45462	0.345245	0.990729
ENST00000421878.2	6.33692	6.85351	0.113059	0.990412	0.996967
ENST00000421891.2	3.41116	3.1582	-0.111159	0.743547	0.990729
ENST00000421894.1	10.8382	8.38886	-0.369576	0.457457	0.990729
ENST00000421907.1	5.07687	4.38648	-0.210876	0.743108	0.990729
ENST00000421931.1	5.39736	4.29779	-0.328656	0.296542	0.990729
ENST00000421933.1	7.72803	5.98834	-0.367945	0.0818531	0.990729
ENST00000421937.3	3.13734	2.62103	-0.259407	0.737714	0.990729
ENST00000421943.1	4.90996	8.01934	0.707773	0.105608	0.990729
ENST00000421964.1	2.81748	4.11174	0.545344	0.398656	0.990729
ENST00000421965.1	1.79001	1.94202	0.117592	0.733924	0.990729
ENST00000421976.2	7.24732	6.71051	-0.111026	0.386495	0.990729
ENST00000421998.1	3.02429	2.67087	-0.179289	0.638189	0.990729
ENST00000422010.1	3.61418	3.26233	-0.147768	0.743108	0.990729
ENST00000422013.2	5.09997	5.49837	0.108516	0.83235	0.990789
ENST00000422017.1	1.27869	1.5111	0.240935	0.86933	0.990789
ENST00000422022.1	8.62359	7.82939	-0.139388	0.643137	0.990729
ENST00000422023.1	3.70812	2.91529	-0.347049	0.586161	0.990729
ENST00000422038.1	2.39195	3.93155	0.71691	0.123367	0.990729
ENST00000422040.2	10.7194	7.47417	-0.520239	0.0799856	0.990729
ENST00000422042.1	2.09183	4.40332	1.07383	0.214214	0.990729
ENST00000422045.1	8.3705	5.1715	-0.694732	0.0728515	0.990729
ENST00000422047.1	3.65454	5.05673	0.468516	0.379564	0.990729
ENST00000422048.1	4.15088	2.63863	-0.653625	0.0215806	0.974252
ENST00000422049.1	3.27339	4.36306	0.414553	0.379564	0.990729
ENST00000422082.2	3.83528	3.43649	-0.158397	0.743547	0.990729
ENST00000422084.1	5.00581	4.87987	-0.0367608	0.848825	0.990789
ENST00000422107.1	0.977065	1.29989	0.41186	0.785385	0.990789
ENST00000422116.1	4.17802	4.72604	0.177813	0.722848	0.990729
ENST00000422117.1	5.43624	6.24774	0.200726	0.383147	0.990729
ENST00000422118.1	8.06655	4.85342	-0.73295	0.0233412	0.974252
ENST00000422124.1	7.61742	9.60228	0.334073	0.378059	0.990729
ENST00000422128.1	4.68959	5.37307	0.196285	0.591769	0.990729
ENST00000422129.2	6.65177	6.50874	-0.0313605	0.902724	0.990789
ENST00000422145.3	2.65361	2.49173	-0.0908072	0.79311	0.990789
ENST00000422148.2	4.06005	2.23665	-0.860156	0.233318	0.990729
ENST00000422150.1	5.88709	4.72123	-0.318391	0.731655	0.990729
ENST00000422153.1	4.20385	3.94791	-0.0906244	0.735079	0.990729
ENST00000422160.1	10.895	6.67596	-0.706614	0.181823	0.990729
ENST00000422162.1	6.4706	5.22502	-0.308463	0.333531	0.990729
ENST00000422175.1	6.8781	4.61641	-0.575238	0.000862296	0.314932
ENST00000422178.1	4.9354	4.30682	-0.196546	0.620206	0.990729
ENST00000422194.1	6.18824	5.6306	-0.13624	0.735241	0.990729
ENST00000422198.1	1.43145	4.68365	1.71016	0.207242	0.990729
ENST00000422201.1	4.66946	5.81804	0.317277	0.549889	0.990729
ENST00000422203.2	5.60215	7.48983	0.418951	0.372441	0.990729
ENST00000422204.1	7.08498	4.66298	-0.603511	0.19339	0.990729
ENST00000422206.1	3.70718	3.9997	0.109569	0.720594	0.990729
ENST00000422216.1	7.09518	6.6753	-0.0880045	0.51968	0.990729
ENST00000422224.1	3.75908	3.40378	-0.14324	0.631499	0.990729
ENST00000422227.1	3.53133	3.62477	0.0376738	0.972924	0.994747
ENST00000422230.1	3.81147	4.0833	0.0993899	0.987974	0.996967
ENST00000422238.1	4.46793	3.44255	-0.376132	0.426675	0.990729
ENST00000422239.1	5.43747	5.25931	-0.0480614	0.999938	0.999938
ENST00000422250.1	4.41521	4.62209	0.0660624	0.878612	0.990789
ENST00000422253.1	3.86852	3.08564	-0.326212	0.606791	0.990729
ENST00000422260.1	3.50097	1.78043	-0.97553	0.227318	0.990729
ENST00000422271.1	5.26949	5.15752	-0.0309831	0.978692	0.996332
ENST00000422284.2	5.10133	3.94723	-0.370035	0.457925	0.990729
ENST00000422305.1	6.66362	5.44039	-0.292595	0.448716	0.990729
ENST00000422306.2	3.88176	3.43303	-0.17723	0.893291	0.990789
ENST00000422310.2	5.62263	4.53541	-0.310013	0.486788	0.990729
ENST00000422343.1	8.28152	4.89868	-0.757502	0.082445	0.990729
ENST00000422345.1	3.28518	3.50809	0.0947145	0.878612	0.990789
ENST00000422353.1	5.00788	5.31007	0.0845288	0.904196	0.990789
ENST00000422357.1	11.4501	7.7315	-0.566535	0.0421738	0.990729
ENST00000422374.1	5.26394	4.60379	-0.19332	0.226671	0.990729
ENST00000422401.1	2.94464	2.72109	-0.113905	0.727211	0.990729
ENST00000422408.2	6.15744	5.53185	-0.154567	0.79311	0.990789
ENST00000422410.1	4.3918	4.73634	0.108962	0.733924	0.990729
ENST00000422414.1	6.87789	6.05797	-0.183131	0.385615	0.990729
ENST00000422415.2	7.76595	6.82426	-0.186491	0.641996	0.990729
ENST00000422417.1	6.28887	6.70312	0.0920326	0.942643	0.990789
ENST00000422438.1	3.6494	4.2788	0.22955	0.63149	0.990729
ENST00000422459.1	7.15624	5.9823	-0.258502	0.342162	0.990729
ENST00000422473.1	6.37107	6.1531	-0.0502228	0.692614	0.990729
ENST00000422480.1	5.39128	5.57622	0.0486603	0.892439	0.990789
ENST00000422510.1	7.30101	5.26931	-0.470483	0.176013	0.990729
ENST00000422519.1	6.41976	6.04596	-0.0865456	0.608494	0.990729
ENST00000422527.1	3.98109	3.85275	-0.0472768	0.877812	0.990789
ENST00000422528.1	3.24976	4.19552	0.368518	0.550033	0.990729
ENST00000422542.2	5.92286	3.72622	-0.668581	0.043395	0.990729
ENST00000422548.1	5.19534	3.24819	-0.67758	0.264129	0.990729
ENST00000422554.2	7.56455	5.66364	-0.417523	0.337678	0.990729
ENST00000422558.1	3.11802	3.66627	0.233684	0.550033	0.990729
ENST00000422574.1	5.53125	6.50902	0.234836	0.423458	0.990729
ENST00000422600.1	5.01504	7.39898	0.561064	0.144442	0.990729
ENST00000422609.1	4.54625	3.07494	-0.564119	0.19548	0.990729
ENST00000422631.1	0.541427	0.469299	-0.206258	0.941948	0.990789
ENST00000422638.1	10.295	8.07573	-0.350272	0.289495	0.990729
ENST00000422649.1	5.06079	3.59665	-0.492711	0.350927	0.990729
ENST00000422657.1	9.42273	7.46713	-0.33559	0.120966	0.990729
ENST00000422665.1	8.61175	8.26975	-0.0584614	0.933733	0.990789
ENST00000422666.1	3.98865	4.45364	0.159085	0.791198	0.990789
ENST00000422675.1	1.57626	1.61107	0.0315179	0.922229	0.990789
ENST00000422683.1	4.12158	5.24308	0.347217	0.474493	0.990729
ENST00000422697.1	4.93942	3.49602	-0.498628	0.375719	0.990729
ENST00000422703.1	3.83672	3.73688	-0.0380411	0.953143	0.992716
ENST00000422716.1	7.35432	8.56684	0.220171	0.478486	0.990729
ENST00000422723.1	4.34164	3.60323	-0.26895	0.426675	0.990729
ENST00000422736.1	1.45582	2.01398	0.468214	0.521933	0.990729
ENST00000422740.1	5.53684	6.20003	0.163213	0.722848	0.990729
ENST00000422744.2	4.92608	2.92898	-0.750043	0.19548	0.990729
ENST00000422761.1	7.93222	8.88869	0.164247	0.604399	0.990729
ENST00000422763.1	3.93138	5.08683	0.371731	0.427207	0.990729
ENST00000422764.1	4.81232	6.41788	0.415365	0.391809	0.990729
ENST00000422776.1	4.93926	6.42665	0.379771	0.372441	0.990729
ENST00000422780.3	10.1999	10.4663	0.0372028	0.993374	0.998913
ENST00000422793.1	5.88254	5.5007	-0.0968227	0.643886	0.990729
ENST00000422799.1	4.12352	4.92077	0.255008	0.4137	0.990729
ENST00000422807.1	5.12541	8.26603	0.689526	0.122634	0.990729
ENST00000422831.1	4.58404	5.17153	0.173972	0.734815	0.990729
ENST00000422833.1	3.12065	7.99448	1.35716	0.129322	0.990729
ENST00000422837.1	6.12643	5.93016	-0.0469756	0.942578	0.990789
ENST00000422841.1	3.66211	3.81176	0.0577812	0.997658	0.999364
ENST00000422844.1	2.51009	5.4414	1.11624	0.310801	0.990729
ENST00000422848.1	6.25631	6.61001	0.0793427	0.943043	0.990789
ENST00000422858.1	10.3738	7.09193	-0.548689	0.171088	0.990729
ENST00000422876.1	3.68315	2.61972	-0.491526	0.444948	0.990729
ENST00000422894.1	6.41242	5.83404	-0.136374	0.885283	0.990789
ENST00000422899.1	5.41094	6.8635	0.343064	0.550033	0.990729
ENST00000422909.1	3.4931	3.71537	0.0889989	0.846437	0.990789
ENST00000422914.1	6.63266	4.24812	-0.642763	0.078392	0.990729
ENST00000422917.1	4.13523	4.69789	0.184047	0.603444	0.990729
ENST00000422931.2	5.12397	5.19672	0.0203407	0.885796	0.990789
ENST00000422938.1	9.50515	7.80989	-0.283406	0.515325	0.990729
ENST00000422956.2	6.46886	6.12281	-0.079317	0.325945	0.990729
ENST00000422961.1	5.75607	5.95754	0.0496345	0.898881	0.990789
ENST00000422963.1	2.51187	4.26418	0.763505	0.309119	0.990729
ENST00000422966.1	8.86597	7.49255	-0.242822	0.471603	0.990729
ENST00000422971.1	6.60319	6.97418	0.0788604	0.742962	0.990729
ENST00000422972.1	4.60971	5.69772	0.305707	0.58795	0.990729
ENST00000422977.1	8.73336	6.57755	-0.408988	0.13096	0.990729
ENST00000422996.1	5.8708	6.95048	0.243555	0.553129	0.990729
ENST00000423008.1	6.31443	5.94937	-0.0859168	0.570676	0.990729
ENST00000423020.1	9.11139	7.32742	-0.314366	0.345569	0.990729
ENST00000423023.2	2.66543	2.25488	-0.24132	0.713788	0.990729
ENST00000423028.1	5.0003	5.12941	0.0367796	0.834205	0.990789
ENST00000423060.1	7.83781	4.1512	-0.916925	0.0202601	0.974252
ENST00000423074.1	6.39084	7.20279	0.17255	0.604513	0.990729
ENST00000423075.1	3.12631	4.38854	0.489276	0.352671	0.990729
ENST00000423086.1	1.60119	2.62742	0.714497	0.310801	0.990729
ENST00000423099.1	3.07518	2.44705	-0.329626	0.721418	0.990729
ENST00000423112.2	4.10464	3.91446	-0.0684451	0.874247	0.990789
ENST00000423120.1	3.3917	3.72883	0.136713	0.931145	0.990789
ENST00000423121.1	4.80767	5.63931	0.230181	0.343045	0.990729
ENST00000423122.1	6.26032	7.37336	0.236086	0.650566	0.990729
ENST00000423149.1	6.17409	4.62578	-0.41653	0.314262	0.990729
ENST00000423153.1	2.59705	2.8162	0.116875	0.806759	0.990789
ENST00000423162.1	2.75712	2.49893	-0.141846	0.743108	0.990729
ENST00000423165.1	6.55605	8.0805	0.301619	0.508197	0.990729
ENST00000423168.1	6.47225	7.4814	0.20904	0.564609	0.990729
ENST00000423171.1	2.95403	3.82028	0.370995	0.443665	0.990729
ENST00000423175.1	3.29274	4.28261	0.379201	0.58795	0.990729
ENST00000423178.2	5.4443	6.13798	0.173017	0.435025	0.990729
ENST00000423187.1	5.53956	4.98399	-0.15247	0.620206	0.990729
ENST00000423193.1	3.98654	6.41043	0.685285	0.208471	0.990729
ENST00000423194.1	8.30672	6.13375	-0.437509	0.103232	0.990729
ENST00000423197.1	6.91634	6.9986	0.0170581	0.954231	0.992716
ENST00000423233.1	2.53588	4.37667	0.787343	0.20572	0.990729
ENST00000423249.1	6.48586	4.74203	-0.451792	0.0494853	0.990729
ENST00000423255.1	2.46241	2.15771	-0.19057	0.713788	0.990729
ENST00000423256.1	4.72532	5.38266	0.187905	0.931145	0.990789
ENST00000423260.1	5.8979	6.12702	0.054986	0.913822	0.990789
ENST00000423268.1	2.77059	5.47226	0.981944	0.145455	0.990729
ENST00000423272.1	3.96048	3.13634	-0.336593	0.490551	0.990729
ENST00000423276.1	7.72389	8.35504	0.113319	0.742962	0.990729
ENST00000423283.1	3.97297	5.36245	0.432674	0.352671	0.990729
ENST00000423310.1	10.8378	8.10576	-0.41905	0.186667	0.990729
ENST00000423326.1	2.72182	2.28203	-0.254259	0.727211	0.990729
ENST00000423329.1	6.07228	4.38669	-0.469105	0.227436	0.990729
ENST00000423346.1	3.78768	6.71805	0.826727	0.163408	0.990729
ENST00000423349.1	5.86764	4.10587	-0.515093	0.350927	0.990729
ENST00000423354.1	3.81459	5.54394	0.539382	0.331493	0.990729
ENST00000423367.1	4.85246	5.36432	0.144676	0.85785	0.990789
ENST00000423380.1	5.17868	4.76643	-0.119675	0.643137	0.990729
ENST00000423385.1	11.7638	10.8379	-0.118267	0.454511	0.990729
ENST00000423390.1	3.63914	3.10295	-0.229955	0.251322	0.990729
ENST00000423394.1	3.68025	5.21083	0.501707	0.310193	0.990729
ENST00000423408.1	4.15438	3.48836	-0.252082	0.484653	0.990729
ENST00000423414.1	7.87998	5.73385	-0.458688	0.149778	0.990729
ENST00000423425.1	7.99704	8.73953	0.128089	0.802776	0.990789
ENST00000423428.1	1.6747	2.67693	0.676679	0.286055	0.990729
ENST00000423433.1	8.61624	8.99381	0.0618735	0.823479	0.990789
ENST00000423440.2	4.90602	5.21496	0.0881023	0.778507	0.990789
ENST00000423466.2	5.98423	3.10377	-0.947145	0.0399897	0.990729
ENST00000423473.2	6.68833	7.8699	0.2347	0.443235	0.990729
ENST00000423474.1	3.61803	3.46988	-0.0603196	0.897535	0.990789
ENST00000423486.1	8.428	7.0505	-0.257464	0.631499	0.990729
ENST00000423489.1	5.32646	3.88904	-0.453765	0.426675	0.990729
ENST00000423499.3	0.528234	0.852105	0.689853	0.441076	0.990729
ENST00000423500.1	2.87511	3.37718	0.232201	0.774102	0.990789
ENST00000423504.1	5.38082	3.13168	-0.780887	0.36789	0.990729
ENST00000423515.2	3.09999	3.32832	0.102535	0.728805	0.990729
ENST00000423519.2	3.8992	3.62479	-0.105282	0.824753	0.990789
ENST00000423523.1	4.83583	5.1625	0.0943063	0.834205	0.990789
ENST00000423539.1	3.03744	2.70565	-0.166883	0.594104	0.990729
ENST00000423551.1	3.331	4.37358	0.392861	0.36403	0.990729
ENST00000423568.1	6.31147	6.31117	-6.91e-05	0.962066	0.99464
ENST00000423580.2	1.50453	2.40615	0.677413	0.17785	0.990729
ENST00000423581.1	3.09008	3.32605	0.106166	0.953143	0.992716
ENST00000423600.1	13.1149	16.0509	0.291443	0.0678626	0.990729
ENST00000423617.1	5.67682	4.54013	-0.322349	0.525248	0.990729
ENST00000423632.1	7.36268	9.1872	0.319394	0.390474	0.990729
ENST00000423643.1	4.55959	3.84492	-0.245948	0.741235	0.990729
ENST00000423663.1	7.17905	6.79329	-0.0796815	0.7031	0.990729
ENST00000423667.1	3.45327	5.1349	0.572372	0.346751	0.990729
ENST00000423689.2	2.87641	4.60442	0.678754	0.0334235	0.990729
ENST00000423704.1	8.46184	8.81223	0.0585353	0.922865	0.990789
ENST00000423706.1	11.3722	9.95612	-0.191853	0.49844	0.990729
ENST00000423708.3	3.2474	3.33269	0.0374031	0.864132	0.990789
ENST00000423712.1	6.10065	6.37526	0.0635223	0.810252	0.990789
ENST00000423715.1	4.40998	4.36499	-0.0147954	0.992367	0.998106
ENST00000423716.1	6.71078	4.61374	-0.540544	0.0933494	0.990729
ENST00000423727.1	7.00247	5.23395	-0.419965	0.565749	0.990729
ENST00000423728.1	11.987	13.9783	0.221715	0.376895	0.990729
ENST00000423733.1	4.90172	5.23147	0.0939305	0.878612	0.990789
ENST00000423747.2	2.73623	2.50245	-0.128844	0.911508	0.990789
ENST00000423781.1	3.57474	5.61176	0.650616	0.13472	0.990729
ENST00000423793.1	5.47199	5.57056	0.0257555	0.806759	0.990789
ENST00000423796.1	1.66474	3.50613	1.07459	0.140084	0.990729
ENST00000423808.1	5.81607	5.28186	-0.138997	0.626583	0.990729
ENST00000423838.1	5.60172	5.04443	-0.151178	0.642971	0.990729
ENST00000423842.1	0.816952	2.79861	1.77639	0.129322	0.990729
ENST00000423846.1	4.03137	3.7418	-0.107538	0.889213	0.990789
ENST00000423864.1	7.1812	7.14089	-0.00812054	0.943043	0.990789
ENST00000423869.1	5.10238	8.63102	0.758362	0.0642066	0.990729
ENST00000423879.1	5.83711	4.52892	-0.366088	0.352287	0.990729
ENST00000423907.1	3.44972	4.61568	0.420062	0.550033	0.990729
ENST00000423913.1	6.73426	5.80206	-0.214954	0.548501	0.990729
ENST00000423914.1	3.85792	4.49515	0.220546	0.734815	0.990729
ENST00000423919.1	4.94135	3.78968	-0.382826	0.43856	0.990729
ENST00000423921.1	4.90402	4.09469	-0.260207	0.520528	0.990729
ENST00000423922.1	5.30941	6.10599	0.201674	0.516096	0.990729
ENST00000423923.1	6.14409	5.28855	-0.216326	0.742339	0.990729
ENST00000423924.1	7.16402	6.59965	-0.118379	0.857803	0.990789
ENST00000423925.1	8.33667	3.02889	-1.46068	0.000474988	0.225343
ENST00000423942.1	3.54695	4.47777	0.336201	0.422855	0.990729
ENST00000423943.1	6.79959	4.67977	-0.539009	0.0589424	0.990729
ENST00000423963.1	4.08568	5.65137	0.468026	0.352671	0.990729
ENST00000423967.1	7.41553	5.71779	-0.375092	0.364984	0.990729
ENST00000423979.1	1.51242	3.4306	1.1816	0.262637	0.990729
ENST00000423988.1	6.18232	6.41144	0.0525007	0.834205	0.990789
ENST00000423999.2	6.86724	7.36396	0.100751	0.809384	0.990789
ENST00000424017.1	5.29644	2.91558	-0.861241	0.112005	0.990729
ENST00000424036.1	0.986158	0.606467	-0.701388	0.456941	0.990729
ENST00000424068.1	15.0213	14.2037	-0.0807373	0.716669	0.990729
ENST00000424075.2	3.7844	4.56503	0.270561	0.501271	0.990729
ENST00000424083.1	4.95364	2.52863	-0.970132	0.227318	0.990729
ENST00000424084.1	7.04398	6.89452	-0.0309397	0.951991	0.992716
ENST00000424101.1	2.12245	2.03668	-0.059512	0.922229	0.990789
ENST00000424111.2	4.59513	4.45589	-0.0443913	0.890917	0.990789
ENST00000424116.2	8.39821	6.32952	-0.407986	0.32441	0.990729
ENST00000424119.1	4.74445	7.31478	0.624574	0.193729	0.990729
ENST00000424126.1	3.5722	2.90438	-0.298583	0.626583	0.990729
ENST00000424154.1	5.88494	11.3137	0.942972	0.0213943	0.974252
ENST00000424162.1	4.64574	3.92316	-0.243895	0.600914	0.990729
ENST00000424170.1	3.93449	3.75163	-0.0686581	0.864132	0.990789
ENST00000424177.1	2.1431	3.31547	0.629512	0.285451	0.990729
ENST00000424181.1	6.35865	9.53077	0.583872	0.222909	0.990729
ENST00000424194.1	3.83091	4.40749	0.202271	0.720625	0.990729
ENST00000424208.1	6.26956	6.82768	0.12303	0.518729	0.990729
ENST00000424215.1	6.64445	4.79674	-0.470095	0.160694	0.990729
ENST00000424219.1	4.71826	4.54807	-0.0529989	0.874247	0.990789
ENST00000424241.1	5.91096	4.1155	-0.522326	0.116044	0.990729
ENST00000424242.1	3.48196	5.97415	0.778837	0.163408	0.990729
ENST00000424244.1	7.50593	6.67098	-0.170131	0.571575	0.990729
ENST00000424246.1	4.38823	4.95194	0.174355	0.700978	0.990729
ENST00000424251.1	2.08778	1.36632	-0.611668	0.36789	0.990729
ENST00000424257.1	1.81274	1.3299	-0.446858	0.490551	0.990729
ENST00000424274.1	1.22539	3.06267	1.32155	0.0629833	0.990729
ENST00000424283.1	7.13819	6.63841	-0.104721	0.743911	0.990729
ENST00000424306.1	8.10551	7.74742	-0.0651871	0.575287	0.990729
ENST00000424308.1	2.18699	3.81422	0.802443	0.497841	0.990729
ENST00000424313.2	8.65925	8.05621	-0.10414	0.834992	0.990789
ENST00000424321.1	7.84555	6.9015	-0.184965	0.234569	0.990729
ENST00000424322.1	12.8327	8.45849	-0.601352	0.0456684	0.990729
ENST00000424332.1	3.50726	3.57594	0.0279762	0.906613	0.990789
ENST00000424333.1	6.81724	6.60372	-0.0459094	0.904279	0.990789
ENST00000424342.1	7.97084	4.9798	-0.678645	0.124642	0.990729
ENST00000424357.1	4.99224	4.60539	-0.116362	0.742103	0.990729
ENST00000424359.1	10.0608	6.27598	-0.680837	0.0944069	0.990729
ENST00000424391.2	3.6534	5.08981	0.478372	0.213158	0.990729
ENST00000424395.1	3.7857	5.44541	0.524482	0.247953	0.990729
ENST00000424415.1	1.32368	0.900448	-0.555839	0.139034	0.990729
ENST00000424417.2	7.7466	6.15892	-0.330885	0.32909	0.990729
ENST00000424418.1	7.62719	10.2781	0.430345	0.36403	0.990729
ENST00000424421.1	2.91921	4.67623	0.679768	0.213886	0.990729
ENST00000424422.1	5.63685	3.37588	-0.739624	0.103584	0.990729
ENST00000424434.1	4.05129	5.88516	0.538703	0.443665	0.990729
ENST00000424435.1	5.52756	6.36871	0.204359	0.395373	0.990729
ENST00000424450.1	9.00886	8.83202	-0.0286011	0.939245	0.990789
ENST00000424451.1	6.33501	3.92301	-0.691385	0.0362887	0.990729
ENST00000424453.1	3.4784	3.02766	-0.200221	0.606791	0.990729
ENST00000424460.1	3.33621	3.98595	0.256714	0.411802	0.990729
ENST00000424474.2	17.5226	16.1336	-0.119152	0.620532	0.990729
ENST00000424487.1	5.28374	7.78005	0.55822	0.200807	0.990729
ENST00000424493.1	16.5048	16.4945	-0.000900613	0.917104	0.990789
ENST00000424496.1	5.72093	3.93803	-0.538777	0.0897175	0.990729
ENST00000424506.1	1.71627	1.5205	-0.174733	0.669281	0.990729
ENST00000424515.2	3.17906	2.6638	-0.255114	0.477346	0.990729
ENST00000424516.1	5.14548	3.28112	-0.649117	0.169994	0.990729
ENST00000424517.3	2.46239	3.24873	0.399819	0.649516	0.990729
ENST00000424521.1	8.46107	6.62518	-0.352882	0.55245	0.990729
ENST00000424523.1	5.97987	5.95155	-0.00684867	0.870785	0.990789
ENST00000424535.1	0.731322	0.242998	-1.58956	0.410722	0.990729
ENST00000424539.1	5.17485	5.35273	0.0487592	0.870785	0.990789
ENST00000424566.1	8.04444	8.89948	0.145728	0.611576	0.990729
ENST00000424569.1	7.02828	7.45132	0.0843234	0.707909	0.990729
ENST00000424580.1	8.14263	7.49926	-0.118746	0.556973	0.990729
ENST00000424587.2	11.7684	12.0683	0.0363046	0.727521	0.990729
ENST00000424592.1	3.39979	3.94877	0.21596	0.774102	0.990789
ENST00000424605.1	2.6448	2.43828	-0.117296	0.885283	0.990789
ENST00000424612.1	9.15362	5.24939	-0.802193	0.0339296	0.990729
ENST00000424613.1	6.99104	5.51006	-0.343439	0.448716	0.990729
ENST00000424615.2	13.8811	11.2423	-0.304184	0.25918	0.990729
ENST00000424628.1	6.59621	4.6585	-0.501772	0.283269	0.990729
ENST00000424630.1	2.78912	5.09649	0.86969	0.0647954	0.990729
ENST00000424640.2	14.5291	15.1202	0.0575271	0.888898	0.990789
ENST00000424655.1	4.79706	4.14798	-0.209742	0.737714	0.990729
ENST00000424657.1	9.69779	7.21433	-0.426791	0.2178	0.990729
ENST00000424662.1	8.29149	7.49519	-0.145667	0.730935	0.990729
ENST00000424664.1	1.96615	2.62487	0.416868	0.554361	0.990729
ENST00000424678.1	0.433955	2.23825	2.36675	0.0793296	0.990729
ENST00000424684.1	17.3115	16.6933	-0.0524531	0.699409	0.990729
ENST00000424689.1	5.33603	5.53502	0.0528231	0.864132	0.990789
ENST00000424696.2	8.55274	6.2013	-0.463816	0.138627	0.990729
ENST00000424701.1	6.21615	5.20488	-0.256155	0.448716	0.990729
ENST00000424705.1	8.74861	7.4108	-0.239425	0.477346	0.990729
ENST00000424725.1	3.58281	3.4193	-0.0673885	0.885283	0.990789
ENST00000424735.1	3.88309	3.03149	-0.357177	0.375719	0.990729
ENST00000424748.1	7.10966	5.92622	-0.262668	0.425522	0.990729
ENST00000424761.1	4.90637	6.14844	0.325564	0.379564	0.990729
ENST00000424769.1	6.42495	5.16556	-0.314761	0.395922	0.990729
ENST00000424770.1	10.0698	10.3398	0.0381736	0.954473	0.992716
ENST00000424774.1	7.18067	5.57158	-0.36603	0.22665	0.990729
ENST00000424786.1	4.71354	2.85447	-0.723587	0.0707562	0.990729
ENST00000424788.1	2.90972	2.99943	0.0438056	0.956939	0.992716
ENST00000424812.1	1.35025	1.4508	0.103623	0.928195	0.990789
ENST00000424819.1	5.08306	5.29631	0.059291	0.911508	0.990789
ENST00000424820.1	2.61777	1.94401	-0.429302	0.565749	0.990729
ENST00000424850.1	6.08272	5.55968	-0.129715	0.819865	0.990789
ENST00000424852.1	7.12647	5.07136	-0.490815	0.121952	0.990729
ENST00000424868.1	5.36787	6.14784	0.195729	0.650599	0.990729
ENST00000424887.1	3.30769	3.2437	-0.0281814	0.906613	0.990789
ENST00000424888.2	4.81965	6.92008	0.521862	0.0868518	0.990729
ENST00000424890.1	7.4822	6.40494	-0.224279	0.225943	0.990729
ENST00000424895.1	2.0764	2.46131	0.245342	0.606878	0.990729
ENST00000424915.1	8.17616	5.61578	-0.541938	0.0845202	0.990729
ENST00000424921.1	4.74219	5.18496	0.128782	0.74813	0.990789
ENST00000424931.1	5.50176	4.54916	-0.274294	0.741235	0.990729
ENST00000424941.2	4.97323	4.13685	-0.265649	0.626583	0.990729
ENST00000424948.1	7.45852	5.64759	-0.401252	0.281127	0.990729
ENST00000424953.1	4.20141	7.16707	0.770511	0.124992	0.990729
ENST00000424980.1	2.64204	2.87768	0.123255	0.86933	0.990789
ENST00000424982.1	3.04371	4.98154	0.710761	0.214697	0.990729
ENST00000424989.1	8.19092	8.18775	-0.000558451	0.919099	0.990789
ENST00000424995.1	4.07228	4.27576	0.0703458	0.914324	0.990789
ENST00000425005.1	3.58109	4.46805	0.319246	0.427207	0.990729
ENST00000425008.3	4.85184	5.69291	0.230636	0.300846	0.990729
ENST00000425010.1	4.40231	5.72647	0.379384	0.350362	0.990729
ENST00000425033.1	96.1516	117.052	0.283772	2.98e-14	8.69e-11
ENST00000425050.1	4.1506	5.1103	0.300087	0.436286	0.990729
ENST00000425057.1	5.01952	4.50554	-0.15585	0.901967	0.990789
ENST00000425058.1	0.447959	1.99182	2.15265	0.0286498	0.990729
ENST00000425076.1	6.50427	6.86754	0.0784062	0.943043	0.990789
ENST00000425077.1	8.2927	8.15686	-0.0238276	0.951991	0.992716
ENST00000425089.1	2.75451	4.65008	0.755461	0.123367	0.990729
ENST00000425104.1	6.55081	6.10816	-0.100937	0.864132	0.990789
ENST00000425109.2	8.83845	9.16925	0.0530104	0.748387	0.990789
ENST00000425110.1	7.06677	6.32485	-0.160021	0.353853	0.990729
ENST00000425124.1	5.58098	6.9328	0.31292	0.502785	0.990729
ENST00000425125.1	4.94149	5.02401	0.0238939	0.905674	0.990789
ENST00000425137.1	4.23506	4.16908	-0.0226542	0.971774	0.994747
ENST00000425150.1	11.1993	11.2662	0.00859176	0.899241	0.990789
ENST00000425153.1	6.26907	8.69763	0.47237	0.28003	0.990729
ENST00000425157.2	3.17968	2.64812	-0.263913	0.488187	0.990729
ENST00000425161.1	4.36102	5.75533	0.400236	0.550033	0.990729
ENST00000425176.1	3.89196	4.85244	0.318212	0.60849	0.990729
ENST00000425183.1	8.94159	6.20333	-0.527489	0.244901	0.990729
ENST00000425185.1	6.12486	4.68589	-0.386353	0.448716	0.990729
ENST00000425192.1	2.87588	1.78544	-0.687724	0.392224	0.990729
ENST00000425194.1	5.38164	6.7538	0.327652	0.409868	0.990729
ENST00000425195.1	3.79604	4.13823	0.124517	0.834205	0.990789
ENST00000425205.1	4.72147	5.18316	0.134599	0.68913	0.990729
ENST00000425211.1	3.40721	4.24132	0.315924	0.0847585	0.990729
ENST00000425212.1	6.7395	7.0703	0.0691304	0.850897	0.990789
ENST00000425228.1	2.43926	2.424	-0.0090568	0.922229	0.990789
ENST00000425233.1	6.76464	7.37354	0.124344	0.700978	0.990729
ENST00000425246.1	7.14957	5.66867	-0.334847	0.32909	0.990729
ENST00000425254.2	4.93307	4.37468	-0.173311	0.641996	0.990729
ENST00000425264.1	7.16214	6.27424	-0.190951	0.644428	0.990729
ENST00000425271.1	4.36334	4.23923	-0.0416323	0.885283	0.990789
ENST00000425275.1	4.01303	6.26787	0.643283	0.213886	0.990729
ENST00000425277.1	8.76145	8.15494	-0.103495	0.639989	0.990729
ENST00000425279.1	3.52923	3.62343	0.0380026	0.904196	0.990789
ENST00000425290.1	3.30043	4.17444	0.338928	0.427207	0.990729
ENST00000425296.1	3.17754	3.28602	0.048431	0.777289	0.990789
ENST00000425309.1	4.96805	3.58841	-0.469335	0.412641	0.990729
ENST00000425322.1	2.06729	2.6269	0.345623	0.847172	0.990789
ENST00000425325.2	6.91535	7.12029	0.0421348	0.985157	0.996967
ENST00000425330.1	3.44441	4.20514	0.2879	0.68913	0.990729
ENST00000425352.1	6.86511	5.4144	-0.342481	0.443833	0.990729
ENST00000425364.1	6.45495	3.98772	-0.694843	0.130404	0.990729
ENST00000425365.1	6.01229	6.06344	0.0122225	0.911209	0.990789
ENST00000425370.1	6.31136	5.53559	-0.189215	0.742103	0.990729
ENST00000425371.2	2.92239	3.76728	0.366375	0.347886	0.990729
ENST00000425384.2	7.00147	6.50671	-0.105729	0.624412	0.990729
ENST00000425385.1	8.07807	6.376	-0.34136	0.453247	0.990729
ENST00000425405.1	9.21381	6.77007	-0.444626	0.252136	0.990729
ENST00000425412.1	8.64887	6.56833	-0.396985	0.358852	0.990729
ENST00000425419.1	9.1112	6.41362	-0.506503	0.116044	0.990729
ENST00000425435.1	5.24075	6.18159	0.238205	0.274282	0.990729
ENST00000425438.1	3.05241	5.03369	0.721667	0.317641	0.990729
ENST00000425449.1	4.8975	4.68421	-0.0642397	0.768693	0.990789
ENST00000425470.1	3.6627	3.82039	0.0608123	0.96281	0.99464
ENST00000425481.1	10.7577	8.34483	-0.366423	0.252136	0.990729
ENST00000425493.1	0.855315	1.54576	0.853789	0.0160953	0.928176
ENST00000425499.2	5.42966	5.22088	-0.0565675	0.942578	0.990789
ENST00000425503.1	4.17408	4.95313	0.246882	0.518346	0.990729
ENST00000425510.1	6.91214	9.97044	0.528523	0.22531	0.990729
ENST00000425517.1	3.05703	2.932	-0.0602481	0.885283	0.990789
ENST00000425541.2	7.59598	5.50772	-0.463781	0.275886	0.990729
ENST00000425554.1	7.51263	7.18623	-0.0640839	0.822291	0.990789
ENST00000425559.1	7.43738	7.52473	0.0168468	0.99198	0.997751
ENST00000425576.1	2.95519	2.56971	-0.20164	0.739725	0.990729
ENST00000425587.1	3.39529	5.06044	0.575727	0.481096	0.990729
ENST00000425588.1	5.79964	5.58124	-0.0553789	0.867415	0.990789
ENST00000425591.1	4.94013	5.32138	0.107252	0.786804	0.990789
ENST00000425604.1	3.6051	2.68837	-0.423306	0.148736	0.990729
ENST00000425624.1	1.42773	4.04915	1.5039	0.0471007	0.990729
ENST00000425631.1	7.38599	7.59426	0.0401171	0.760342	0.990789
ENST00000425632.1	2.38302	2.49896	0.0685308	0.86933	0.990789
ENST00000425645.1	6.07564	5.407	-0.16821	0.735079	0.990729
ENST00000425648.1	5.34731	6.43178	0.266405	0.516096	0.990729
ENST00000425657.1	8.16539	6.152	-0.408465	0.192831	0.990729
ENST00000425666.1	6.1925	5.72899	-0.112239	0.797304	0.990789
ENST00000425669.1	4.57382	2.70467	-0.757946	0.0292551	0.990729
ENST00000425674.1	7.6574	8.50045	0.150686	0.626106	0.990729
ENST00000425678.1	5.30396	5.39476	0.0244902	0.913822	0.990789
ENST00000425688.1	4.25032	4.37706	0.0423923	0.936186	0.990789
ENST00000425698.1	6.45695	9.2372	0.516604	0.237037	0.990729
ENST00000425709.1	3.89464	4.1838	0.103323	0.7561	0.990789
ENST00000425711.1	5.99762	4.23212	-0.503011	0.311231	0.990729
ENST00000425723.2	4.44576	5.51631	0.311274	0.459427	0.990729
ENST00000425727.1	7.57993	9.76875	0.36599	0.281966	0.990729
ENST00000425734.1	4.75922	8.26088	0.795571	0.0611629	0.990729
ENST00000425742.1	11.6024	17.9828	0.632194	0.0703955	0.990729
ENST00000425746.2	4.71364	3.90054	-0.273168	0.600914	0.990729
ENST00000425750.2	2.87578	2.51654	-0.192513	0.743108	0.990729
ENST00000425754.1	1.40598	0.796479	-0.819869	0.3384	0.990729
ENST00000425763.1	5.63551	4.6161	-0.287872	0.600914	0.990729
ENST00000425775.1	4.70728	4.56813	-0.0432892	0.997658	0.999364
ENST00000425776.1	7.69341	5.58552	-0.461931	0.131417	0.990729
ENST00000425779.1	3.01072	3.95398	0.393194	0.459427	0.990729
ENST00000425799.2	4.0249	3.50391	-0.199987	0.743853	0.990729
ENST00000425800.1	3.74811	3.90865	0.060509	0.987974	0.996967
ENST00000425802.1	6.10309	6.42218	0.0735209	0.810252	0.990789
ENST00000425820.1	2.83907	2.67478	-0.0859955	0.864132	0.990789
ENST00000425837.1	6.96793	4.90538	-0.506366	0.195947	0.990729
ENST00000425850.1	3.23036	6.39089	0.984321	0.0359994	0.990729
ENST00000425879.1	5.33866	5.96791	0.160751	0.563477	0.990729
ENST00000425881.1	7.98881	5.56424	-0.521795	0.219947	0.990729
ENST00000425884.1	9.58786	7.95688	-0.269006	0.336225	0.990729
ENST00000425887.2	6.78536	6.16724	-0.1378	0.450917	0.990729
ENST00000425894.1	5.07831	4.80936	-0.0785028	0.874247	0.990789
ENST00000425896.1	7.77037	8.30795	0.0965083	0.741028	0.990729
ENST00000425900.1	2.74341	3.13252	0.191354	0.904196	0.990789
ENST00000425914.2	6.64659	5.20906	-0.351591	0.243615	0.990729
ENST00000425939.1	6.18576	6.23401	0.0112108	0.98636	0.996967
ENST00000425949.1	7.87007	7.11792	-0.14492	0.419962	0.990729
ENST00000425953.1	5.6677	6.20899	0.131595	0.597246	0.990729
ENST00000425963.1	5.56921	4.41506	-0.335039	0.488187	0.990729
ENST00000425966.2	4.22595	5.33372	0.335869	0.256371	0.990729
ENST00000425974.1	3.62446	4.88562	0.430774	0.135	0.990729
ENST00000425979.1	5.42811	4.11613	-0.399161	0.404666	0.990729
ENST00000425983.1	6.83181	6.17371	-0.146128	0.734201	0.990729
ENST00000425991.1	9.15165	9.38011	0.0355722	0.999938	0.999938
ENST00000426012.1	8.27158	6.40778	-0.368338	0.300749	0.990729
[truncated: 21,080 more rows]
