# Supplementary material for: Cross-platform genomic identification and clinical validation of breast cancer diagnostic biomarkers
Source: Aging (Albany NY). 2021 Jan 20;13(3):4258–73. doi: 10.18632/aging.202388 (PMC7906147; doi:10.18632/aging.202388)
Supplement: Supplementary Table 5 [file aging-13-202388-s006.xlsx]

## Sheet: Sheet1
Supplementary Table 5. Differential expression of plasma miRNA by RNA sequencing.
genes	logFC	logCPM	LR	PValue	FDR
hsa-miR-590-3p	-10.5315	3.12778	31.897	1.63e-08	4.21e-05
hsa-miR-374a-5p	-3.97363	8.84407	26.9767	2.06e-07	0.000266458
hsa-miR-4492	11.0038	3.59085	25.3712	4.73e-07	0.000407984
hsa-miR-374a-3p	-4.7503	5.23506	24.3063	8.22e-07	0.000531652
hsa-miR-20a-5p	-3.59326	12.5989	23.7207	1.11e-06	0.000576487
hsa-miR-454-3p	-3.3381	7.61024	17.9157	2.31e-05	0.00874414
hsa-miR-126-5p	-3.35579	7.7733	17.8701	2.37e-05	0.00874414
hsa-miR-374b-5p	-3.23791	7.39054	17.1308	3.49e-05	0.0100602
hsa-miR-1246	4.88379	8.16788	17.1257	3.5e-05	0.0100602
hsa-miR-651-5p	-3.65032	4.25118	16.5326	4.78e-05	0.012376
hsa-miR-664a-3p	-3.70379	3.98113	16.3288	5.32e-05	0.0125282
hsa-miR-483-5p	8.91264	1.56801	15.8202	6.97e-05	0.015022
hsa-miR-3150b-3p	8.82122	1.4845	15.0662	0.000103808	0.0206658
hsa-miR-3960	5.09018	5.82718	14.1217	0.000171353	0.0316758
hsa-miR-873-3p	8.69313	1.36572	13.8091	0.000202348	0.0349119
hsa-miR-4665-5p	8.67387	1.34315	13.2836	0.000267744	0.0433076
hsa-miR-1290	4.54034	5.25266	12.9989	0.00031168	0.0461303
hsa-miR-16-5p	-2.27076	13.8013	12.9446	0.000320844	0.0461303
hsa-miR-4488	8.5386	6.25008	12.5775	0.000390419	0.0521239
hsa-miR-92a-3p	-2.20863	13.7381	12.5191	0.000402812	0.0521239
hsa-miR-450b-5p	-4.3404	3.66142	11.9854	0.000536201	0.0660803
hsa-miR-320a	2.50864	14.6087	11.8378	0.00058041	0.0682773
hsa-miR-32-5p	-3.32719	7.1922	11.5117	0.000691611	0.0746779
hsa-let-7f-5p	-2.57443	13.0341	11.5092	0.000692531	0.0746779
hsa-miR-1297	-2.6863	4.68521	11.255	0.000794068	0.0822019
hsa-miR-624-5p	-3.13997	3.24112	11.048	0.000887846	0.0883629
hsa-miR-370-3p	3.1163	7.71498	10.9783	0.00092187	0.0883629
hsa-miR-340-5p	-2.57837	8.70498	10.5147	0.0011843	0.106221
hsa-miR-4516	4.668	4.09965	10.5054	0.00119026	0.106221
hsa-miR-1908-5p	2.75153	3.87104	10.4083	0.00125448	0.10822
hsa-miR-125a-3p	8.2014	0.908818	10.3453	0.00129808	0.108368
hsa-miR-760	8.22928	0.932707	10.2461	0.00136971	0.110775
hsa-miR-374b-3p	-8.12873	0.844236	10.0724	0.00150507	0.118034
hsa-miR-3188	8.05169	0.774945	9.68272	0.00186009	0.141586
hsa-miR-1292-5p	2.7837	4.61597	9.32369	0.0022621	0.167266
hsa-miR-190a-5p	-2.41936	5.6059	8.9415	0.00278764	0.2004
hsa-miR-490-3p	7.89191	0.639349	8.85005	0.0029308	0.202424
hsa-miR-5090	7.93447	0.667424	8.82444	0.00297222	0.202424
hsa-miR-320e	2.38084	4.93821	8.69133	0.00319726	0.206657
hsa-miR-1304-5p	2.33327	4.4567	8.53961	0.00347499	0.206657
hsa-miR-95-3p	-7.79161	0.545493	8.49689	0.00355754	0.206657
hsa-miR-450a-5p	-2.64356	4.62074	8.44932	0.00365179	0.206657
hsa-miR-1228-5p	8.04319	0.760012	8.44545	0.00365958	0.206657
hsa-miR-101-3p	-2.02916	13.8482	8.44181	0.0036669	0.206657
hsa-miR-4489	7.91815	0.650515	8.42298	0.00370509	0.206657
hsa-miR-196a-5p	-2.22444	5.11839	8.38584	0.00378156	0.206657
hsa-miR-6850-5p	7.83053	0.574956	8.32809	0.00390367	0.206657
hsa-miR-576-5p	-2.21207	5.53006	8.31718	0.00392719	0.206657
hsa-miR-3607-3p	-7.82177	0.579143	8.30691	0.00394946	0.206657
hsa-let-7g-5p	-1.89752	13.6378	8.25928	0.00405442	0.206657
hsa-miR-518a-5p	7.74375	0.501994	8.19646	0.00419723	0.206657
hsa-miR-23b-5p	7.7201	0.483434	8.16073	0.00428072	0.206657
hsa-miR-660-5p	-2.11225	7.79711	8.15359	0.00429761	0.206657
hsa-let-7f-1-3p	-2.46182	3.77565	8.12142	0.00437453	0.206657
hsa-miR-548h-5p	-7.75197	0.507767	8.11426	0.00439185	0.206657
hsa-miR-4429	2.42151	3.92389	7.78115	0.00527942	0.243985
hsa-miR-451b	2.92267	3.45439	7.60096	0.00583373	0.262757
hsa-miR-4669	-9.07404	1.72879	7.58405	0.00588869	0.262757
hsa-let-7b-5p	1.81969	14.6315	7.53482	0.00605178	0.265458
hsa-miR-1306-3p	2.60546	3.96797	7.47107	0.00626982	0.270438
hsa-miR-2110	2.15871	7.85378	7.40064	0.00652006	0.274366
hsa-miR-193a-5p	2.54411	5.99681	7.38612	0.00657292	0.274366
hsa-miR-4750-5p	7.55338	0.345796	7.32401	0.00680396	0.279502
hsa-miR-4498	7.58046	0.356378	7.28681	0.00694628	0.28089
hsa-miR-548f-5p	-2.28692	4.35143	7.2317	0.00716274	0.281891
hsa-miR-374c-3p	-7.49402	0.2906	7.22392	0.00719383	0.281891
hsa-miR-15b-5p	-1.94044	8.38677	7.19817	0.00729779	0.281891
hsa-miR-32-3p	-7.39882	0.207846	6.84526	0.00888768	0.325009
hsa-miR-3158-3p	1.92415	8.90242	6.79427	0.00914507	0.325009
hsa-miR-939-5p	2.30743	4.10514	6.78689	0.00918295	0.325009
hsa-miR-139-3p	2.5047	3.04385	6.78541	0.00919059	0.325009
hsa-miR-598-3p	-2.1688	3.97399	6.776	0.00923919	0.325009
hsa-miR-6511b-5p	7.42782	0.225933	6.73157	0.00947212	0.325009
hsa-miR-4508	2.28061	5.69468	6.72741	0.00949421	0.325009
hsa-miR-548e-3p	-2.25696	4.47166	6.71456	0.00956287	0.325009
hsa-miR-320c	1.96748	7.75112	6.69992	0.00964175	0.325009
hsa-miR-1307-3p	1.78639	9.50949	6.69472	0.00966991	0.325009
hsa-miR-144-5p	-1.83599	10.85	6.62913	0.0100324	0.329674
hsa-miR-194-5p	-1.74499	10.2059	6.62363	0.0100635	0.329674
hsa-miR-92b-5p	2.49739	3.76915	6.5663	0.0103928	0.336207
hsa-miR-5582-3p	-7.30778	0.132308	6.50588	0.0107518	0.343528
hsa-miR-6130	-2.52135	2.62208	6.44952	0.0110983	0.350272
hsa-miR-4638-3p	7.29216	0.118462	6.42327	0.0112634	0.351202
hsa-miR-1224-5p	2.30061	4.19654	6.37715	0.0115599	0.356155
hsa-miR-335-3p	-2.58479	2.83929	6.35586	0.0116994	0.356212
hsa-miR-548ak	-7.26001	0.0930602	6.33043	0.0118683	0.357155
hsa-miR-129-5p	7.25403	0.0846278	6.26187	0.0123364	0.366973
hsa-miR-3656	2.33547	5.67391	6.22206	0.0126169	0.369365
hsa-miR-3074-5p	2.45319	4.44179	6.21011	0.0127023	0.369365
hsa-miR-629-5p	1.72273	10.1293	6.16701	0.0130154	0.373453
hsa-miR-664a-5p	2.05726	5.13216	6.15131	0.0131315	0.373453
hsa-miR-3180	7.20255	0.0425863	6.08987	0.0135959	0.382458
hsa-miR-4678	-7.18088	0.0253224	6.04108	0.0139767	0.385884
hsa-miR-26b-5p	-1.64955	10.8427	6.03614	0.0140159	0.385884
hsa-miR-4470	7.17766	0.0280581	5.99688	0.0143312	0.387523
hsa-miR-20b-5p	-1.792	9.75893	5.99151	0.0143749	0.387523
hsa-miR-342-5p	2.52917	5.95501	5.85261	0.0155539	0.414985
hsa-miR-4497	2.56593	3.81793	5.79221	0.0160973	0.416697
hsa-miR-199b-5p	-2.49736	5.91019	5.76513	0.0163473	0.416697
hsa-miR-378a-3p	1.55673	12.508	5.74051	0.016578	0.416697
hsa-miR-744-5p	1.70845	9.01976	5.73519	0.0166283	0.416697
hsa-miR-23a-5p	3.81171	2.81433	5.73081	0.0166698	0.416697
hsa-miR-424-5p	-2.28211	4.61975	5.72983	0.0166791	0.416697
hsa-miR-25-5p	2.01613	5.32292	5.72289	0.0167452	0.416697
hsa-miR-148b-3p	-1.6276	9.41425	5.65333	0.0174222	0.429417
hsa-miR-941	1.90997	9.32517	5.59862	0.0179747	0.438853
hsa-miR-320b	1.93689	5.9193	5.5803	0.0181636	0.439323
hsa-miR-3196	4.4086	2.35901	5.48451	0.0191857	0.458837
hsa-miR-3198	7.07723	-0.0683377	5.47186	0.0193251	0.458837
hsa-miR-1284	-6.99771	-0.120511	5.441	0.0196694	0.462768
hsa-miR-7704	2.02919	4.0271	5.41629	0.0199497	0.465135
hsa-miR-27a-5p	1.85987	5.99745	5.3646	0.0205495	0.467151
hsa-miR-4440	7.04324	-0.0969573	5.3344	0.0209086	0.467151
hsa-miR-4660	7.01885	-0.115339	5.31394	0.0211555	0.467151
hsa-miR-214-5p	6.99406	-0.133911	5.28493	0.0215108	0.467151
hsa-miR-579-3p	-6.9419	-0.167626	5.28476	0.0215129	0.467151
hsa-miR-122-5p	2.83889	8.5376	5.28123	0.0215565	0.467151
hsa-miR-6724-5p	6.95429	-0.160415	5.27015	0.0216942	0.467151
hsa-miR-610	2.38293	2.49318	5.26122	0.0218057	0.467151
hsa-miR-4532	8.23818	0.930104	5.23918	0.0220837	0.467151
hsa-miR-6734-5p	2.05534	3.98346	5.21611	0.0223786	0.467151
hsa-miR-3135b	1.85728	8.548	5.19779	0.0226156	0.467151
hsa-miR-4781-3p	6.89066	-0.210169	5.18723	0.0227534	0.467151
hsa-miR-4525	6.87541	-0.217988	5.1692	0.0229909	0.467151
hsa-miR-15a-5p	-1.70667	10.0286	5.16815	0.0230047	0.467151
hsa-miR-3191-5p	6.86368	-0.22974	5.1566	0.0231582	0.467151
hsa-miR-92b-3p	-1.76413	5.67121	5.12526	0.02358	0.467151
hsa-miR-1277-3p	-6.88757	-0.217173	5.12268	0.0236151	0.467151
hsa-miR-6859-5p	2.28761	2.76037	5.11794	0.0236797	0.467151
hsa-miR-6862-5p	6.83621	-0.24952	5.11704	0.023692	0.467151
hsa-miR-3613-5p	-6.90968	-0.20099	5.1124	0.0237554	0.467151
hsa-miR-1287-5p	2.55822	5.96077	5.10567	0.0238478	0.467151
hsa-miR-134-5p	2.3569	6.65654	5.08306	0.0241607	0.467151
hsa-miR-7113-5p	6.92097	-0.194494	5.08111	0.0241879	0.467151
hsa-miR-4443	2.93266	3.49789	5.06384	0.0244301	0.468334
hsa-miR-1254	1.88955	3.71686	5.00164	0.0253233	0.476177
hsa-miR-3122	6.77089	-0.306842	4.99986	0.0253494	0.476177
hsa-miR-196b-5p	-1.81685	3.67948	4.99701	0.0253912	0.476177
hsa-miR-548at-5p	-6.73136	-0.336755	4.96682	0.0258381	0.481072
hsa-miR-99a-5p	1.66199	6.08635	4.95317	0.0260429	0.481421
hsa-miR-6847-5p	6.81585	-0.278255	4.93036	0.0263889	0.484358
hsa-miR-454-5p	-2.15989	3.27678	4.89306	0.0269649	0.487911
hsa-miR-4317	-6.65956	-0.391168	4.87986	0.0271719	0.487911
hsa-miR-5584-5p	6.71556	-0.353829	4.86258	0.0274453	0.487911
hsa-miR-3173-3p	6.7455	-0.332574	4.85757	0.0275251	0.487911
hsa-miR-5096	6.7455	-0.332574	4.85757	0.0275251	0.487911
hsa-miR-320d	1.79435	5.16035	4.83916	0.0278204	0.48979
hsa-miR-627-3p	-6.56083	-0.468043	4.72669	0.029698	0.513226
hsa-miR-6726-3p	-6.56083	-0.468043	4.72669	0.029698	0.513226
hsa-miR-423-5p	1.6718	12.4117	4.72388	0.0297465	0.513226
hsa-miR-6772-3p	6.59372	-0.447464	4.69822	0.0301938	0.515697
hsa-miR-5585-3p	6.56056	-0.470235	4.69286	0.0302882	0.515697
hsa-miR-643	-6.47979	-0.527656	4.63316	0.0313598	0.525684
hsa-miR-548ao-3p	-6.47979	-0.527656	4.63316	0.0313598	0.525684
hsa-miR-29a-3p	-1.62547	9.13288	4.62637	0.0314841	0.525684
hsa-miR-4804-3p	6.47642	-0.531964	4.59865	0.0319972	0.530826
hsa-miR-3687	7.9235	0.644739	4.56761	0.0325821	0.536736
hsa-miR-330-5p	1.6181	5.61683	4.55784	0.0327683	0.536736
hsa-miR-6767-5p	6.4243	-0.571788	4.516	0.0335792	0.545978
hsa-miR-4467	7.89118	0.61578	4.50145	0.033866	0.545978
hsa-miR-30a-3p	-1.53269	7.56755	4.49644	0.0339654	0.545978
hsa-miR-1255b-5p	1.80048	5.13075	4.48198	0.034254	0.547219
hsa-miR-766-5p	2.27286	2.40362	4.37632	0.0364416	0.578594
hsa-miR-148a-5p	1.66146	5.66571	4.35995	0.0367935	0.580619
hsa-miR-20a-3p	-3.61659	1.80024	4.33176	0.0374076	0.586733
hsa-miR-548aj-5p	-2.08805	2.62308	4.27068	0.0387753	0.604522
hsa-miR-339-3p	1.5828	7.5936	4.23966	0.0394901	0.610477
hsa-miR-98-5p	-1.5677	8.27106	4.23219	0.0396642	0.610477
hsa-miR-579-5p	1.67597	3.90091	4.22362	0.039865	0.610477
hsa-miR-548ar-3p	-7.66493	0.418823	4.08896	0.0431642	0.657112
hsa-miR-146b-3p	1.62618	4.93879	4.02977	0.044704	0.66785
hsa-miR-4500	-1.4669	8.42718	4.02861	0.0447348	0.66785
hsa-miR-6780a-5p	3.37759	2.16297	4.02355	0.0448692	0.66785
hsa-miR-548ad-5p	-1.62572	5.06224	4.01427	0.0451168	0.66785
hsa-miR-652-5p	-3.52566	1.81645	4.01266	0.0451599	0.66785
hsa-miR-1255b-2-3p	1.75949	4.02752	3.99404	0.0456614	0.67143
hsa-miR-1-3p	-1.87238	5.22019	3.93104	0.0474026	0.693095
hsa-miR-27a-3p	-1.40866	9.92772	3.92111	0.0476835	0.693286
hsa-miR-3177-3p	2.10752	2.67506	3.8943	0.0484502	0.700498
hsa-miR-1273h-3p	1.54278	4.09212	3.85516	0.0495933	0.710802
hsa-miR-139-5p	1.48218	5.17027	3.85114	0.0497122	0.710802
hsa-miR-7-5p	-1.27821	11.0613	3.79225	0.0514903	0.729805
hsa-miR-4446-3p	1.73733	3.5522	3.78089	0.0518412	0.729805
hsa-miR-17-5p	-1.27542	11.6581	3.76628	0.0522959	0.729805
hsa-miR-106a-5p	-1.41963	11.2306	3.76379	0.0523737	0.729805
hsa-miR-664b-5p	3.31231	2.03305	3.76132	0.0524512	0.729805
hsa-miR-3912-3p	-1.74438	3.05412	3.74896	0.0528404	0.731289
hsa-miR-221-5p	-1.57646	4.6412	3.70686	0.0541891	0.745965
hsa-miR-382-3p	-7.32718	0.168124	3.65396	0.055936	0.763277
hsa-miR-29b-3p	-1.4931	7.60466	3.65097	0.0560366	0.763277
hsa-miR-642a-3p	7.43353	0.213986	3.62205	0.0570185	0.768562
hsa-miR-6807-5p	7.43353	0.213986	3.62205	0.0570185	0.768562
hsa-miR-199a-3p	-1.33485	8.4561	3.59659	0.0578983	0.776378
hsa-miR-424-3p	1.49015	5.42035	3.54049	0.0598876	0.798913
hsa-miR-1180-3p	1.48011	8.66112	3.50172	0.0613053	0.803847
hsa-miR-140-5p	-1.58678	7.35299	3.49871	0.0614166	0.803847
hsa-miR-3688-3p	-1.65358	4.28808	3.49342	0.061613	0.803847
hsa-miR-889-3p	-7.23475	0.0918717	3.48782	0.0618219	0.803847
hsa-miR-7706	1.46058	4.82442	3.48685	0.0618582	0.803847
hsa-miR-22-3p	1.43725	14.8246	3.47983	0.0621211	0.803847
hsa-miR-3184-3p	1.58169	11.7102	3.43942	0.0636581	0.819638
hsa-miR-6852-5p	1.53373	3.45281	3.32971	0.0680391	0.871708
hsa-miR-6884-5p	2.07849	2.38468	3.30208	0.0691923	0.882116
hsa-miR-301a-3p	-1.93172	2.24789	3.26037	0.070973	0.900383
hsa-miR-378f	1.54	3.67416	3.22748	0.0724121	0.914158
hsa-miR-155-5p	-1.36613	6.55252	3.18915	0.0741287	0.930024
hsa-miR-3184-5p	1.30209	10.3842	3.18345	0.0743876	0.930024
hsa-miR-2355-3p	1.46177	4.04062	3.1529	0.075792	0.943027
hsa-let-7a-5p	-1.17012	14.9995	3.1154	0.0775553	0.960349
hsa-miR-708-5p	-6.9928	-0.103678	3.07507	0.079501	0.975606
hsa-miR-548ay-3p	-2.23797	1.81664	3.07425	0.0795413	0.975606
hsa-miR-6842-3p	1.30551	4.8451	3.04679	0.0808971	0.987555
hsa-miR-6855-5p	3.5238	1.43269	3.02204	0.0821402	0.993676
hsa-miR-6877-5p	1.71406	2.61937	3.02152	0.0821664	0.993676
hsa-miR-378i	3.29428	1.36542	2.96976	0.0848345	1
hsa-miR-664b-3p	-3.14117	1.56959	2.95027	0.0858631	1
hsa-miR-1273h-5p	1.70296	2.49863	2.93369	0.086749	1
hsa-miR-330-3p	1.30456	5.64845	2.91341	0.0878461	1
hsa-miR-30c-5p	-1.1682	10.2727	2.8898	0.0891419	1
hsa-miR-551a	6.79121	-0.256873	2.87917	0.0897321	1
hsa-miR-30e-3p	-1.32348	5.59811	2.87095	0.0901917	1
hsa-miR-15a-3p	-6.74752	-0.295694	2.85072	0.091333	1
hsa-miR-4638-5p	6.95987	-0.182412	2.85045	0.0913485	1
hsa-miR-5010-5p	1.77426	2.77983	2.84375	0.0917297	1
hsa-miR-365a-3p	-2.82488	2.51094	2.83156	0.0924284	1
hsa-miR-6515-5p	1.77303	2.33235	2.82568	0.0927673	1
hsa-miR-942-5p	1.38693	5.24797	2.81346	0.0934763	1
hsa-miR-33a-3p	-6.65557	-0.365924	2.79463	0.0945804	1
hsa-miR-582-5p	-3.06372	1.66553	2.78943	0.0948878	1
hsa-miR-30e-5p	-1.0498	12.1961	2.78538	0.0951282	1
hsa-miR-24-3p	1.09698	10.8382	2.77981	0.0954597	1
hsa-miR-107	-1.42292	3.71166	2.77657	0.0956529	1
hsa-miR-4732-5p	1.29677	5.84451	2.77313	0.0958585	1
hsa-miR-378g	1.50456	4.54564	2.76187	0.0965352	1
hsa-miR-4637	-6.77686	-0.323515	2.76026	0.0966326	1
hsa-miR-195-5p	-3.28568	1.17101	2.7563	0.0968721	1
hsa-miR-1270	1.89246	3.07859	2.75578	0.0969038	1
hsa-miR-3605-5p	2.01272	1.92749	2.7518	0.0971448	1
hsa-miR-548o-3p	-1.50072	3.68735	2.75144	0.0971671	1
hsa-miR-3928-3p	1.39552	3.28847	2.74958	0.0972801	1
hsa-miR-1278	-1.83024	2.3379	2.74748	0.0974076	1
hsa-miR-6735-3p	6.57177	-0.423607	2.74552	0.0975276	1
hsa-miR-337-3p	-6.55736	-0.439808	2.73542	0.0981458	1
hsa-miR-7854-3p	1.78453	2.15942	2.7123	0.0995772	1
hsa-miR-1275	1.78646	2.8509	2.70654	0.0999375	1
hsa-miR-18a-5p	-1.55502	7.66821	2.69463	0.100687	1
hsa-miR-21-5p	-0.972677	14.0134	2.69234	0.100832	1
hsa-miR-338-3p	6.47371	-0.49622	2.68694	0.101174	1
hsa-miR-1289	6.68583	-0.4002	2.68492	0.101303	1
hsa-miR-4647	6.68583	-0.4002	2.68492	0.101303	1
hsa-miR-550a-3-5p	1.30455	6.04463	2.65334	0.103333	1
hsa-miR-148b-5p	-1.21156	6.20939	2.65223	0.103405	1
hsa-miR-26a-2-3p	-6.39624	-0.558394	2.63984	0.104214	1
hsa-miR-3682-3p	6.60834	-0.460093	2.63914	0.10426	1
hsa-miR-548ap-3p	-3.02545	1.47084	2.63524	0.104516	1
hsa-miR-3150a-5p	2.8439	1.89973	2.60406	0.10659	1
hsa-miR-542-5p	6.31284	-0.612664	2.59242	0.107376	1
hsa-miR-4642	6.31284	-0.612664	2.59242	0.107376	1
hsa-miR-34c-5p	-6.47423	-0.556095	2.58133	0.108131	1
hsa-miR-6516-3p	-6.47423	-0.556095	2.58133	0.108131	1
hsa-miR-6885-3p	-6.27786	-0.643356	2.57088	0.108847	1
hsa-miR-628-5p	-1.86629	2.38929	2.55379	0.11003	1
hsa-miR-1298-5p	6.43964	-0.587715	2.54112	0.110916	1
hsa-miR-5189-3p	-6.3875	-0.620486	2.53137	0.111603	1
hsa-miR-1268a	2.19878	2.19991	2.51368	0.112862	1
hsa-miR-1587	1.30795	3.52642	2.51279	0.112926	1
hsa-miR-25-3p	-0.960234	14.2387	2.50745	0.113309	1
hsa-miR-4747-5p	6.34727	-0.655914	2.4884	0.114688	1
hsa-miR-6868-3p	6.34727	-0.655914	2.4884	0.114688	1
hsa-miR-943	6.13175	-0.739614	2.48838	0.11469	1
hsa-miR-4507	6.13175	-0.739614	2.48838	0.11469	1
hsa-miR-6855-3p	6.13175	-0.739614	2.48838	0.11469	1
hsa-miR-379-3p	-6.07981	-0.781224	2.45791	0.116934	1
hsa-miR-570-3p	-6.07981	-0.781224	2.45791	0.116934	1
hsa-miR-1538	6.06595	-0.784616	2.4512	0.117435	1
hsa-miR-6806-3p	1.52933	2.57136	2.44689	0.117758	1
hsa-miR-26a-5p	-0.943013	13.055	2.43378	0.118746	1
hsa-miR-335-5p	-1.24568	5.07751	2.43376	0.118748	1
hsa-miR-933	6.24858	-0.727406	2.43284	0.118818	1
hsa-miR-4533	6.24858	-0.727406	2.43284	0.118818	1
hsa-miR-4657	6.24858	-0.727406	2.43284	0.118818	1
hsa-miR-4726-5p	6.24858	-0.727406	2.43284	0.118818	1
hsa-miR-6808-3p	6.24858	-0.727406	2.43284	0.118818	1
hsa-miR-30b-3p	1.52961	2.60679	2.42538	0.119384	1
hsa-miR-548av-5p	-1.22512	5.1465	2.39236	0.121929	1
hsa-miR-487a-3p	-5.93085	-0.881252	2.37494	0.123296	1
hsa-miR-655-3p	-5.93085	-0.881252	2.37494	0.123296	1
hsa-miR-5690	-5.93085	-0.881252	2.37494	0.123296	1
hsa-miR-450a-2-3p	6.14264	-0.802516	2.37407	0.123365	1
hsa-miR-6825-5p	6.14264	-0.802516	2.37407	0.123365	1
hsa-miR-3163	-6.09082	-0.832469	2.36504	0.124081	1
hsa-miR-27b-5p	1.64355	2.14961	2.36056	0.124437	1
hsa-miR-7155-3p	5.84837	-0.929013	2.33062	0.126852	1
hsa-miR-4791	-3.11598	1.14869	2.32981	0.126918	1
hsa-miR-4676-5p	6.02831	-0.88162	2.31167	0.128406	1
hsa-miR-4762-5p	6.02831	-0.88162	2.31167	0.128406	1
hsa-miR-24-1-5p	-5.97662	-0.910462	2.30292	0.129131	1
hsa-miR-34b-5p	-5.97662	-0.910462	2.30292	0.129131	1
hsa-miR-548g-3p	-5.97662	-0.910462	2.30292	0.129131	1
hsa-miR-3680-5p	-5.97662	-0.910462	2.30292	0.129131	1
hsa-miR-106b-5p	-1.2888	11.301	2.30216	0.129194	1
hsa-miR-181d-5p	1.21191	4.80493	2.29697	0.129627	1
hsa-miR-432-3p	-5.7647	-0.98895	2.28442	0.130679	1
hsa-miR-378e	1.26389	4.29196	2.28013	0.131041	1
hsa-miR-1306-5p	-1.42149	2.82031	2.26932	0.131958	1
hsa-miR-4667-5p	5.90414	-0.965152	2.2451	0.134038	1
hsa-miR-4753-5p	5.90414	-0.965152	2.2451	0.134038	1
hsa-miR-6721-5p	5.90414	-0.965152	2.2451	0.134038	1
hsa-miR-6815-5p	5.90414	-0.965152	2.2451	0.134038	1
hsa-miR-500a-5p	-1.27841	3.87078	2.24443	0.134096	1
hsa-miR-187-3p	5.68262	-1.03431	2.2412	0.134377	1
hsa-miR-885-5p	5.68262	-1.03431	2.2412	0.134377	1
hsa-miR-937-3p	5.68262	-1.03431	2.2412	0.134377	1
hsa-miR-4659a-5p	-5.85262	-0.992779	2.23666	0.134772	1
hsa-miR-1197	-5.67384	-1.04607	2.23582	0.134845	1
hsa-miR-3117-3p	-5.67384	-1.04607	2.23582	0.134845	1
hsa-miR-4448	1.5966	2.52764	2.22463	0.135825	1
hsa-miR-6741-5p	2.63446	2.14036	2.22322	0.135949	1
hsa-miR-410-3p	-2.89226	1.59865	2.20701	0.137385	1
hsa-miR-548y	-1.22903	3.76702	2.19989	0.138021	1
hsa-miR-147b	5.592	-1.0901	2.19319	0.138622	1
hsa-miR-3150a-3p	5.592	-1.0901	2.19319	0.138622	1
hsa-miR-3192-5p	5.592	-1.0901	2.19319	0.138622	1
hsa-miR-129-1-3p	-5.57688	-1.10562	2.18465	0.139393	1
hsa-miR-539-5p	-5.57688	-1.10562	2.18465	0.139393	1
hsa-miR-219b-5p	-5.57688	-1.10562	2.18465	0.139393	1
hsa-miR-3064-3p	-5.57688	-1.10562	2.18465	0.139393	1
hsa-miR-3074-3p	5.76827	-1.05362	2.17371	0.140388	1
hsa-miR-6739-3p	5.76827	-1.05362	2.17371	0.140388	1
hsa-miR-548a-3p	-1.69223	2.08435	2.16682	0.141018	1
hsa-miR-4795-3p	-5.71694	-1.07991	2.1656	0.14113	1
hsa-miR-6505-5p	-5.71694	-1.07991	2.1656	0.14113	1
hsa-miR-4714-5p	5.4953	-1.14824	2.14265	0.143254	1
hsa-miR-6770-5p	5.4953	-1.14824	2.14265	0.143254	1
hsa-miR-301a-5p	-1.89743	1.54524	2.13879	0.143615	1
hsa-miR-9-3p	-5.47292	-1.16783	2.13058	0.144387	1
hsa-miR-431-3p	-5.47292	-1.16783	2.13058	0.144387	1
hsa-miR-5188	-5.47292	-1.16783	2.13058	0.144387	1
hsa-miR-1294	1.25546	4.78125	2.11908	0.145474	1
hsa-miR-340-3p	-1.2961	3.51109	2.0967	0.147617	1
hsa-miR-3190-3p	5.39165	-1.20892	2.08924	0.14834	1
hsa-miR-3620-5p	5.39165	-1.20892	2.08924	0.14834	1
hsa-miR-5006-3p	5.39165	-1.20892	2.08924	0.14834	1
hsa-miR-148a-3p	-0.953793	11.7174	2.07767	0.149469	1
hsa-miR-299-5p	-5.36087	-1.23294	2.0732	0.149906	1
hsa-miR-1228-3p	-5.36087	-1.23294	2.0732	0.149906	1
hsa-miR-5094	-5.36087	-1.23294	2.0732	0.149906	1
hsa-miR-6509-3p	-5.36087	-1.23294	2.0732	0.149906	1
hsa-miR-7111-3p	-5.36087	-1.23294	2.0732	0.149906	1
hsa-miR-362-3p	-2.42238	2.38256	2.04734	0.152473	1
hsa-miR-135a-5p	-2.69839	1.43699	2.04427	0.15278	1
hsa-let-7a-3p	-1.23599	4.23698	2.03391	0.153825	1
hsa-miR-204-5p	5.27996	-1.27239	2.03258	0.153959	1
hsa-miR-122-3p	5.27996	-1.27239	2.03258	0.153959	1
hsa-miR-496	5.27996	-1.27239	2.03258	0.153959	1
hsa-miR-4734	5.27996	-1.27239	2.03258	0.153959	1
hsa-miR-6848-5p	5.27996	-1.27239	2.03258	0.153959	1
hsa-miR-151a-3p	0.944102	11.6481	2.02975	0.154246	1
hsa-miR-382-5p	1.44599	4.28352	2.0264	0.154587	1
hsa-miR-3164	2.84795	1.29838	2.02604	0.154623	1
hsa-miR-181b-2-3p	-5.23938	-1.30125	2.01204	0.156056	1
hsa-miR-548aw	-5.23938	-1.30125	2.01204	0.156056	1
hsa-let-7c-5p	-1.0864	6.71866	2.01197	0.156063	1
hsa-miR-182-3p	5.15888	-1.33893	1.97217	0.160218	1
hsa-miR-193b-5p	5.15888	-1.33893	1.97217	0.160218	1
hsa-miR-455-5p	5.15888	-1.33893	1.97217	0.160218	1
hsa-miR-548j-3p	5.15888	-1.33893	1.97217	0.160218	1
hsa-miR-3661	5.15888	-1.33893	1.97217	0.160218	1
hsa-miR-3944-5p	5.15888	-1.33893	1.97217	0.160218	1
hsa-miR-4526	5.15888	-1.33893	1.97217	0.160218	1
hsa-miR-4747-3p	5.15888	-1.33893	1.97217	0.160218	1
hsa-miR-4767	5.15888	-1.33893	1.97217	0.160218	1
hsa-miR-5581-3p	5.15888	-1.33893	1.97217	0.160218	1
hsa-miR-6770-3p	5.15888	-1.33893	1.97217	0.160218	1
hsa-miR-6881-5p	5.15888	-1.33893	1.97217	0.160218	1
hsa-miR-369-3p	-2.88655	1.17135	1.96184	0.161317	1
hsa-miR-1299	-2.72637	6.38489	1.95257	0.16231	1
hsa-miR-26a-1-3p	-5.10669	-1.3731	1.94645	0.16297	1
hsa-miR-96-3p	-5.10669	-1.3731	1.94645	0.16297	1
hsa-miR-337-5p	-5.10669	-1.3731	1.94645	0.16297	1
hsa-miR-196b-3p	-5.10669	-1.3731	1.94645	0.16297	1
hsa-miR-539-3p	-5.10669	-1.3731	1.94645	0.16297	1
hsa-miR-548p	-5.10669	-1.3731	1.94645	0.16297	1
hsa-miR-6879-3p	-5.10669	-1.3731	1.94645	0.16297	1
hsa-miR-3127-5p	2.812	1.07339	1.93463	0.164253	1
hsa-miR-3064-5p	2.75213	1.22277	1.93254	0.164481	1
hsa-miR-542-3p	-1.23829	4.02678	1.92881	0.164889	1
hsa-miR-514a-3p	5.02668	-1.40886	1.90739	0.167254	1
hsa-miR-455-3p	5.02668	-1.40886	1.90739	0.167254	1
hsa-miR-3190-5p	5.02668	-1.40886	1.90739	0.167254	1
hsa-miR-3195	5.02668	-1.40886	1.90739	0.167254	1
hsa-miR-4639-5p	5.02668	-1.40886	1.90739	0.167254	1
hsa-miR-4664-3p	5.02668	-1.40886	1.90739	0.167254	1
hsa-miR-5192	5.02668	-1.40886	1.90739	0.167254	1
hsa-miR-6131	5.02668	-1.40886	1.90739	0.167254	1
hsa-miR-6781-5p	5.02668	-1.40886	1.90739	0.167254	1
hsa-miR-6826-5p	5.02668	-1.40886	1.90739	0.167254	1
hsa-miR-654-5p	1.53049	3.23128	1.8769	0.170687	1
hsa-miR-331-5p	-1.0908	3.67126	1.85562	0.173131	1
hsa-miR-27b-3p	-1.02879	8.8407	1.83972	0.174984	1
hsa-miR-659-5p	1.25514	2.78089	1.82579	0.176626	1
hsa-miR-345-5p	0.975911	7.96246	1.79681	0.180099	1
hsa-miR-484	-0.980225	9.68523	1.77734	0.182476	1
hsa-miR-223-3p	-1.15806	10.8874	1.7493	0.185965	1
hsa-miR-219a-1-3p	1.66669	1.87508	1.74854	0.18606	1
hsa-miR-548ae-3p	-1.31093	2.71565	1.74755	0.186185	1
hsa-miR-29c-3p	-1.26639	4.49646	1.73507	0.187765	1
hsa-miR-659-3p	1.3896	2.14197	1.7348	0.187799	1
hsa-miR-491-5p	1.42049	3.61837	1.72362	0.189228	1
hsa-miR-342-3p	-1.04518	7.83955	1.72038	0.189644	1
hsa-miR-1976	-1.14409	4.52454	1.71702	0.190077	1
hsa-miR-5787	2.88678	0.894049	1.70702	0.191373	1
hsa-miR-7-1-3p	-1.22815	2.73073	1.70379	0.191793	1
hsa-miR-423-3p	0.937787	10.9008	1.69734	0.192637	1
hsa-miR-191-3p	1.21685	2.70151	1.68813	0.193847	1
hsa-miR-6501-5p	1.02637	4.59367	1.66496	0.196935	1
hsa-miR-421	-0.942919	6.20945	1.65521	0.198252	1
hsa-miR-147a	1.21919	3.12361	1.65077	0.198854	1
hsa-miR-425-5p	0.800598	11.7627	1.63184	0.201449	1
hsa-miR-1260b	1.14523	3.62073	1.59797	0.206192	1
hsa-miR-618	-2.26785	2.73943	1.56205	0.211365	1
hsa-miR-106a-3p	-2.24434	1.83621	1.55917	0.211787	1
hsa-miR-3529-3p	-0.93802	10.3494	1.54679	0.21361	1
hsa-miR-5187-5p	2.35209	1.49678	1.54579	0.213757	1
hsa-miR-378b	1.10162	6.50703	1.54435	0.213972	1
hsa-miR-2278	1.49463	1.79936	1.54328	0.21413	1
hsa-miR-4466	2.58051	0.889368	1.54056	0.214534	1
hsa-miR-548f-3p	-1.32355	3.30172	1.52558	0.216778	1
hsa-miR-96-5p	-0.87794	8.6756	1.51426	0.21849	1
hsa-miR-1301-3p	0.936709	5.11496	1.48639	0.222778	1
hsa-miR-4738-3p	2.34512	1.42771	1.48421	0.223118	1
hsa-miR-143-3p	-0.786717	10.3972	1.47197	0.225035	1
hsa-miR-9-5p	-1.141	2.88208	1.44463	0.229392	1
hsa-miR-671-5p	1.20349	4.04267	1.43587	0.230809	1
hsa-miR-4646-5p	1.46647	1.66839	1.41489	0.234247	1
hsa-miR-2115-5p	2.26981	1.73186	1.38389	0.239439	1
hsa-miR-324-3p	1.08666	8.02109	1.38136	0.239869	1
hsa-miR-652-3p	0.872006	11.5112	1.38067	0.239987	1
hsa-miR-1285-3p	0.843678	6.50362	1.35043	0.245203	1
hsa-miR-1827	-1.29598	1.95501	1.34468	0.246211	1
hsa-miR-409-3p	1.08635	6.26288	1.3135	0.251761	1
hsa-miR-493-3p	1.15707	3.99584	1.30769	0.252814	1
hsa-miR-500b-5p	-1.08171	2.9485	1.307	0.252938	1
hsa-miR-6805-5p	2.53581	0.738011	1.30407	0.253472	1
hsa-miR-3065-5p	1.52451	1.85559	1.29057	0.255943	1
hsa-miR-92a-1-5p	2.22357	1.61264	1.28649	0.256696	1
hsa-miR-3187-3p	1.02835	2.9342	1.28342	0.257265	1
hsa-miR-146a-5p	0.768579	11.4614	1.2742	0.25898	1
hsa-miR-5010-3p	-0.844581	5.81366	1.26401	0.260894	1
hsa-miR-103a-3p	-0.704955	14.2462	1.26302	0.261079	1
hsa-miR-150-5p	-0.924809	10.0596	1.26144	0.261378	1
hsa-miR-103b	-0.880945	5.69237	1.25507	0.262586	1
hsa-miR-425-3p	0.805681	8.26712	1.25418	0.262756	1
hsa-miR-1273g-3p	1.48061	1.5784	1.25395	0.262799	1
hsa-miR-3679-5p	2.27359	1.09406	1.23359	0.26671	1
hsa-miR-3922-5p	1.01257	2.91803	1.2268	0.26803	1
hsa-miR-485-5p	1.95239	2.0226	1.20431	0.272461	1
hsa-miR-451a	-0.642995	18.558	1.20012	0.273297	1
hsa-miR-3200-5p	0.838452	4.72641	1.19439	0.274446	1
hsa-miR-99b-5p	0.772417	7.36503	1.1824	0.276868	1
hsa-miR-30a-5p	-0.667102	11.7434	1.17575	0.278222	1
hsa-miR-3155b	2.33279	0.805615	1.16854	0.279702	1
hsa-miR-93-5p	-0.674658	13.3289	1.15815	0.281849	1
hsa-miR-548ab	-0.928828	3.42261	1.1578	0.281922	1
hsa-miR-1291	1.02867	3.2531	1.13346	0.287038	1
hsa-miR-378d	1.09155	5.34514	1.10701	0.292732	1
hsa-miR-30b-5p	-1.0601	9.71974	1.10075	0.2941	1
hsa-miR-200c-3p	-0.844977	3.92848	1.09898	0.294491	1
hsa-miR-31-5p	-1.22245	2.50787	1.09668	0.294997	1
hsa-miR-636	1.05776	3.04843	1.09398	0.295591	1
hsa-miR-15b-3p	-0.879602	6.99427	1.07001	0.300944	1
hsa-miR-3614-5p	1.08671	2.15316	1.05904	0.303434	1
hsa-miR-874-3p	0.935295	4.38176	1.04724	0.306143	1
hsa-let-7d-3p	-0.760996	7.20478	1.03659	0.308615	1
hsa-miR-192-5p	-0.63308	11.1285	1.02468	0.311412	1
hsa-miR-494-3p	-1.06368	2.63493	1.02154	0.312154	1
hsa-miR-132-5p	1.03022	2.44413	1.01937	0.312668	1
hsa-miR-4742-3p	-1.9298	1.46209	1.01833	0.312915	1
hsa-miR-126-3p	-0.686381	12.8547	1.01151	0.314541	1
hsa-miR-145-5p	-0.72254	6.97701	0.981229	0.321896	1
hsa-miR-580-3p	-0.892339	3.01943	0.974426	0.323579	1
hsa-miR-452-5p	0.822296	3.7357	0.964595	0.326032	1
hsa-miR-3133	-2.11435	0.659937	0.955619	0.328293	1
hsa-miR-17-3p	0.781546	7.37279	0.955098	0.328425	1
hsa-miR-3909	-0.958271	2.35437	0.947688	0.330309	1
hsa-miR-136-3p	-1.93505	2.10898	0.94457	0.331105	1
hsa-miR-361-5p	-0.769122	5.65935	0.941201	0.331969	1
hsa-miR-3691-5p	2.00153	0.96426	0.922295	0.336873	1
hsa-miR-502-5p	-1.95365	1.05941	0.917589	0.338109	1
hsa-miR-4521	-1.03517	2.26305	0.91625	0.338462	1
hsa-miR-6134	-1.16596	1.79547	0.912151	0.339544	1
hsa-miR-6866-5p	1.25647	1.55914	0.896132	0.343821	1
hsa-miR-590-5p	-1.97436	0.876584	0.893794	0.344451	1
hsa-miR-3182	-2.73552	0.940279	0.889188	0.345697	1
hsa-miR-3158-5p	2.00107	0.735807	0.873904	0.349877	1
hsa-miR-197-5p	1.83252	1.32079	0.866197	0.35201	1
hsa-miR-28-3p	0.64778	8.44966	0.855286	0.355061	1
hsa-miR-548as-5p	-1.28451	1.31413	0.835365	0.360726	1
hsa-miR-654-3p	-1.11697	2.62523	0.834935	0.360849	1
hsa-miR-31-3p	2.77883	0.790135	0.830868	0.362022	1
hsa-miR-422a	1.65445	1.95928	0.826495	0.363288	1
hsa-miR-142-5p	-0.802725	10.1062	0.814427	0.366815	1
hsa-miR-4672	-2.04818	0.420535	0.806661	0.369109	1
hsa-miR-627-5p	0.908672	2.77735	0.800078	0.37107	1
hsa-miR-185-5p	0.531841	14.7016	0.79636	0.372184	1
hsa-miR-505-5p	0.904426	2.55754	0.794002	0.372893	1
hsa-miR-34a-5p	-2.07892	0.230056	0.78867	0.374502	1
hsa-miR-199a-5p	-0.686986	8.11354	0.785301	0.375525	1
hsa-miR-877-3p	-1.84097	0.910045	0.760699	0.38311	1
hsa-miR-130b-5p	-0.792097	3.86146	0.759592	0.383456	1
hsa-miR-6842-5p	1.29283	0.990192	0.750396	0.386351	1
hsa-miR-339-5p	-0.747623	6.81585	0.74979	0.386543	1
hsa-miR-1273f	1.86017	0.715454	0.746365	0.38763	1
hsa-miR-6514-5p	1.92693	0.504414	0.745378	0.387944	1
hsa-miR-550b-3p	0.782586	2.80429	0.742875	0.388741	1
hsa-miR-192-3p	-0.810431	3.34019	0.741148	0.389293	1
hsa-miR-4326	0.670828	5.89564	0.73923	0.389908	1
hsa-miR-4746-5p	0.731364	3.22897	0.736925	0.390648	1
hsa-miR-18b-5p	-1.44009	3.39248	0.731385	0.392435	1
hsa-miR-3615	0.607653	9.19994	0.711398	0.39898	1
hsa-miR-550a-3p	-0.805536	5.75367	0.710435	0.3993	1
hsa-miR-619-5p	1.06334	1.79415	0.708632	0.399898	1
hsa-miR-4785	1.51805	2.20195	0.707717	0.400203	1
hsa-miR-548a-5p	-1.18834	1.16407	0.706673	0.400551	1
hsa-miR-24-2-5p	0.63842	5.70887	0.692874	0.405188	1
hsa-miR-296-3p	1.84242	0.536209	0.68674	0.407275	1
hsa-miR-6783-3p	-1.9803	0.156936	0.684849	0.407922	1
hsa-miR-628-3p	-1.10013	1.35674	0.680778	0.409319	1
hsa-miR-6750-5p	1.18482	1.12527	0.67543	0.411165	1
hsa-miR-574-5p	1.57332	1.49279	0.669439	0.413247	1
hsa-miR-30c-2-3p	1.8023	0.512128	0.650139	0.420063	1
hsa-miR-1250-5p	0.809335	2.63188	0.634244	0.425803	1
hsa-miR-4676-3p	-1.90131	0.105196	0.622321	0.430186	1
hsa-miR-409-5p	-0.921696	2.00181	0.618895	0.431458	1
hsa-miR-181c-5p	0.726462	3.57344	0.614105	0.433247	1
hsa-miR-7977	0.899504	2.85234	0.612963	0.433674	1
hsa-miR-411-5p	-0.845385	2.16724	0.606768	0.436007	1
hsa-miR-1303	0.840918	2.2207	0.590717	0.442142	1
hsa-miR-3934-5p	0.700852	2.9712	0.589548	0.442594	1
hsa-miR-1468-5p	1.62285	0.832596	0.585463	0.444179	1
hsa-miR-128-1-5p	1.67909	0.592209	0.580859	0.445976	1
hsa-miR-324-5p	0.687891	7.67481	0.578131	0.447046	1
hsa-miR-5189-5p	2.20207	1.23762	0.575605	0.44804	1
hsa-miR-3124-5p	0.986154	1.47729	0.574275	0.448565	1
hsa-miR-501-3p	0.560414	5.77831	0.573593	0.448835	1
hsa-miR-4772-5p	0.948478	1.86963	0.567787	0.45114	1
hsa-let-7b-3p	-0.581583	4.36516	0.567488	0.451259	1
hsa-let-7e-5p	-0.585152	4.68075	0.560683	0.453985	1
hsa-miR-548q	1.52336	1.10299	0.558911	0.454699	1
hsa-miR-3619-3p	1.73938	0.282681	0.555788	0.455962	1
hsa-miR-361-3p	0.528397	8.98179	0.554021	0.456679	1
hsa-miR-4646-3p	-1.31829	2.04865	0.543474	0.460997	1
hsa-miR-1304-3p	0.549212	4.57194	0.531509	0.465973	1
hsa-miR-2276-3p	1.65087	0.628623	0.525519	0.468497	1
hsa-miR-758-3p	-1.85545	1.93523	0.520205	0.470754	1
hsa-miR-363-3p	-0.43756	12.7578	0.516286	0.47243	1
hsa-miR-1296-5p	-1.34547	1.74844	0.514476	0.473208	1
hsa-miR-4473	-0.925342	1.50512	0.50565	0.477028	1
hsa-miR-99b-3p	0.598519	3.1378	0.500118	0.479448	1
hsa-miR-136-5p	1.41998	1.2222	0.498821	0.480019	1
hsa-miR-589-3p	-1.57973	0.532549	0.498322	0.480238	1
hsa-miR-152-3p	0.502341	7.29288	0.493405	0.482412	1
hsa-miR-1273c	0.633774	2.75746	0.490724	0.483604	1
hsa-miR-3609	1.63008	0.387998	0.489535	0.484135	1
hsa-miR-433-3p	1.34209	1.51543	0.484666	0.486316	1
hsa-miR-127-5p	-1.77861	1.96977	0.482105	0.48747	1
hsa-miR-504-5p	-1.35356	1.54287	0.477169	0.489707	1
hsa-miR-100-5p	0.49857	9.10932	0.471814	0.492154	1
hsa-miR-197-3p	-0.668843	7.24838	0.466786	0.494469	1
hsa-miR-181a-5p	0.432526	12.0275	0.46615	0.494764	1
hsa-miR-23a-3p	-0.512857	9.62249	0.465208	0.4952	1
hsa-miR-3913-3p	0.552176	4.14962	0.454849	0.500041	1
hsa-miR-331-3p	-0.548149	7.49106	0.454065	0.500411	1
hsa-miR-432-5p	0.760267	4.03957	0.434798	0.509644	1
hsa-miR-378a-5p	0.589093	5.2412	0.434794	0.509646	1
hsa-miR-191-5p	0.401153	14.0159	0.434487	0.509795	1
hsa-miR-6799-3p	-1.43712	0.64093	0.424626	0.514638	1
hsa-miR-4999-5p	-0.969366	0.893129	0.417312	0.518281	1
hsa-miR-7641	0.961672	1.10658	0.416693	0.518592	1
hsa-miR-744-3p	1.35725	0.889131	0.414906	0.51949	1
hsa-miR-548ah-3p	-0.911217	1.35191	0.412361	0.520774	1
hsa-miR-576-3p	0.438133	8.09058	0.403367	0.525356	1
hsa-miR-4659a-3p	-0.880651	1.15473	0.394735	0.529821	1
hsa-miR-210-3p	0.552701	9.01247	0.391586	0.531467	1
hsa-miR-1226-3p	-1.26443	1.12623	0.387255	0.533746	1
hsa-miR-3653-3p	1.28262	1.03763	0.381702	0.536694	1
hsa-miR-548av-3p	-0.72332	2.09035	0.379422	0.537913	1
hsa-miR-26b-3p	-0.507228	4.42825	0.374139	0.540757	1
hsa-miR-6503-3p	0.77807	1.44093	0.368505	0.54382	1
hsa-miR-548ac	-0.794027	1.40758	0.365184	0.545641	1
hsa-miR-6749-3p	-1.25328	1.03751	0.364937	0.545777	1
hsa-miR-3140-3p	0.815801	1.28263	0.363824	0.54639	1
hsa-miR-543	1.29664	0.846296	0.361965	0.547417	1
hsa-miR-10a-5p	-0.467219	7.07256	0.35578	0.550859	1
hsa-miR-6818-3p	-1.48709	-0.0483101	0.355428	0.551057	1
hsa-miR-154-5p	-1.92542	0.129493	0.344483	0.557253	1
hsa-miR-1234-3p	1.31334	0.497469	0.339718	0.559992	1
hsa-miR-3913-5p	0.533846	2.9674	0.337825	0.561087	1
hsa-miR-190b	-0.797227	1.32511	0.33753	0.561259	1
hsa-miR-548ap-5p	0.521086	2.96676	0.335953	0.562175	1
hsa-miR-19b-3p	-0.400116	9.99186	0.334247	0.563169	1
hsa-miR-222-3p	0.417386	8.59715	0.331339	0.564872	1
hsa-let-7g-3p	-0.706619	3.31354	0.329764	0.565798	1
hsa-miR-589-5p	0.421378	6.52616	0.325481	0.568332	1
hsa-miR-5100	-0.902961	0.907734	0.325169	0.568518	1
hsa-miR-326	0.568294	7.99389	0.322949	0.569841	1
hsa-miR-4435	1.3381	0.425622	0.320137	0.571525	1
hsa-miR-3617-5p	1.35264	0.131225	0.314929	0.574671	1
hsa-miR-548u	-0.836149	0.960793	0.312016	0.576446	1
hsa-miR-2277-3p	1.13823	1.20407	0.298382	0.584899	1
hsa-miR-6857-3p	0.708671	1.41181	0.294236	0.587518	1
hsa-miR-224-5p	0.528452	2.78198	0.293501	0.587986	1
hsa-miR-877-5p	0.420751	4.6483	0.292175	0.58883	1
hsa-miR-4732-3p	0.408836	5.61186	0.291013	0.589572	1
hsa-miR-10b-5p	0.611551	2.39688	0.287805	0.591631	1
hsa-miR-4511	0.585351	2.57587	0.285684	0.592999	1
hsa-miR-6503-5p	1.27667	0.171948	0.284694	0.593641	1
hsa-miR-671-3p	0.444173	3.41658	0.27812	0.597936	1
hsa-miR-329-3p	-1.5477	0.714876	0.27668	0.598886	1
hsa-miR-501-5p	0.398664	4.36408	0.275158	0.599892	1
hsa-miR-493-5p	-1.04888	1.69796	0.272707	0.601522	1
hsa-miR-30d-5p	-0.350175	12.4477	0.271875	0.602077	1
hsa-miR-125a-5p	-0.393189	6.07691	0.271396	0.602397	1
hsa-miR-4433a-3p	-0.560877	6.47094	0.268924	0.604055	1
hsa-miR-1288-3p	0.774894	0.920363	0.263262	0.607888	1
hsa-miR-6782-3p	-1.20784	0.22225	0.261056	0.609396	1
hsa-miR-487b-3p	-1.01512	1.70845	0.25615	0.612778	1
hsa-miR-186-5p	-0.307887	12.2164	0.255673	0.613108	1
hsa-miR-873-5p	0.621486	1.75658	0.254157	0.614163	1
hsa-miR-378h	1.45573	0.729089	0.24643	0.6196	1
hsa-miR-185-3p	0.343966	8.0106	0.246223	0.619747	1
hsa-miR-1261	-1.12071	0.440487	0.243347	0.621799	1
hsa-miR-4772-3p	0.509738	2.43016	0.238517	0.625279	1
hsa-miR-4474-3p	-1.1743	0.0457481	0.229784	0.631684	1
hsa-miR-4742-5p	-1.48405	0.668052	0.2293	0.632043	1
hsa-miR-30d-3p	0.402401	3.7009	0.228243	0.63283	1
hsa-miR-1285-5p	0.874486	1.92519	0.225255	0.635065	1
hsa-miR-3688-5p	-0.448638	3.06714	0.224081	0.635948	1
hsa-miR-130b-3p	0.371593	6.40896	0.219263	0.639602	1
hsa-miR-181b-5p	0.327699	7.56971	0.218978	0.639819	1
hsa-miR-548am-5p	1.1128	0.157999	0.214266	0.643444	1
hsa-miR-4659b-5p	0.964353	0.972916	0.212086	0.645137	1
hsa-miR-5695	-0.48044	2.43673	0.208238	0.648152	1
hsa-miR-125b-5p	-0.331597	6.11941	0.202579	0.652647	1
hsa-miR-4325	-0.538588	1.71394	0.202512	0.652701	1
hsa-miR-6775-3p	-1.04317	0.267028	0.197228	0.656968	1
hsa-miR-6741-3p	-1.00171	0.429306	0.192175	0.661112	1
hsa-miR-3176	0.399053	3.16417	0.192173	0.661114	1
hsa-miR-130a-3p	-0.317067	7.23584	0.191794	0.661427	1
hsa-miR-376c-3p	-0.820126	2.21683	0.186343	0.665978	1
hsa-miR-485-3p	-0.883567	1.36789	0.185467	0.666716	1
hsa-miR-6777-3p	-0.872283	1.14244	0.180777	0.670707	1
hsa-miR-4685-3p	0.491993	4.15903	0.179542	0.671767	1
hsa-miR-641	-0.39389	2.61518	0.178962	0.672266	1
hsa-miR-550a-5p	0.639865	1.21677	0.176416	0.674472	1
hsa-miR-143-5p	-0.353717	4.28982	0.175957	0.674871	1
hsa-miR-502-3p	0.303432	6.90891	0.16756	0.682289	1
hsa-miR-5009-5p	0.537724	1.50071	0.167196	0.682616	1
hsa-miR-375	0.450846	2.73487	0.163807	0.685676	1
hsa-miR-338-5p	0.367048	3.21664	0.161868	0.687443	1
hsa-miR-16-1-3p	0.381144	7.20342	0.160199	0.688974	1
hsa-miR-6803-3p	-0.733356	1.93475	0.156551	0.692352	1
hsa-miR-4510	1.14842	0.76393	0.156134	0.692741	1
hsa-miR-500a-3p	0.279701	8.83641	0.155452	0.693378	1
hsa-miR-3179	0.541105	1.40185	0.151815	0.696807	1
hsa-miR-33b-5p	1.23351	0.239069	0.150296	0.698253	1
hsa-miR-3940-3p	-0.302053	4.13474	0.147972	0.700481	1
hsa-miR-103a-2-5p	-0.468331	2.91984	0.146049	0.70234	1
hsa-miR-1271-5p	-0.733222	1.7818	0.145576	0.702799	1
hsa-miR-1972	1.2835	-0.0902218	0.141905	0.706395	1
hsa-miR-181a-2-3p	-0.278864	5.92832	0.141333	0.706959	1
hsa-miR-4762-3p	1.24386	0.239652	0.139556	0.708723	1
hsa-miR-184	0.640282	3.13754	0.138859	0.709418	1
hsa-miR-6852-3p	-0.847386	0.456341	0.137834	0.710444	1
hsa-miR-128-3p	-0.276696	8.45799	0.136461	0.711825	1
hsa-miR-377-3p	0.776358	0.983471	0.135235	0.713064	1
hsa-miR-21-3p	-0.343962	6.12904	0.133369	0.714964	1
hsa-miR-7855-5p	0.467164	1.44731	0.133267	0.715069	1
hsa-miR-3620-3p	-0.747049	1.25763	0.132325	0.716034	1
hsa-miR-183-3p	-0.381517	2.53694	0.132121	0.716243	1
hsa-miR-215-5p	-0.727751	1.86352	0.13024	0.718183	1
hsa-miR-127-3p	0.37046	7.23031	0.122886	0.725926	1
hsa-miR-141-3p	-0.547195	0.709487	0.121889	0.726994	1
hsa-miR-146b-5p	0.235361	10.3467	0.121835	0.727053	1
hsa-miR-132-3p	0.294345	3.65983	0.120129	0.728895	1
hsa-miR-381-3p	0.373214	5.39483	0.118958	0.730167	1
hsa-let-7d-5p	-0.22664	9.82013	0.11636	0.733016	1
hsa-miR-6515-3p	-1.17893	-0.215213	0.11633	0.73305	1
hsa-miR-3667-3p	-0.9898	0.741873	0.115566	0.733895	1
hsa-miR-503-5p	-0.287495	6.13485	0.114769	0.734778	1
hsa-miR-29c-5p	-0.310809	5.85242	0.113024	0.736728	1
hsa-miR-3200-3p	-0.265943	5.16005	0.110033	0.740107	1
hsa-miR-4644	0.718217	0.743401	0.108266	0.742127	1
hsa-miR-6733-5p	0.802985	0.0608385	0.106044	0.744693	1
hsa-miR-29b-2-5p	0.244863	4.62019	0.104535	0.746453	1
hsa-miR-328-3p	0.25817	6.88952	0.102657	0.748665	1
hsa-miR-548ad-3p	-0.438655	1.26748	0.101839	0.749634	1
hsa-miR-1307-5p	0.282209	6.17026	0.100811	0.750859	1
hsa-miR-3136-5p	-0.707491	0.623636	0.100699	0.750992	1
hsa-miR-942-3p	0.27932	2.92394	0.0989443	0.7531	1
hsa-miR-19a-3p	-0.20348	10.8976	0.0981238	0.754093	1
hsa-miR-3613-3p	1.05005	-0.0322389	0.0978996	0.754365	1
hsa-miR-16-2-3p	-0.347218	3.08311	0.0968308	0.755667	1
hsa-miR-140-3p	0.183071	13.9269	0.0967164	0.755806	1
hsa-miR-376a-3p	-0.853615	0.993035	0.0927222	0.760745	1
hsa-miR-6514-3p	-0.651154	0.837761	0.09207	0.761562	1
hsa-miR-200b-3p	-0.334705	2.60854	0.0913585	0.762457	1
hsa-miR-151a-5p	-0.242273	7.39258	0.0912989	0.762532	1
hsa-let-7i-3p	-0.255184	5.77907	0.0896965	0.764563	1
hsa-miR-6516-5p	0.412008	1.24537	0.0877994	0.766994	1
hsa-miR-5001-3p	-0.321872	3.06698	0.0877405	0.76707	1
hsa-miR-431-5p	0.537052	2.16593	0.0875058	0.767372	1
hsa-miR-133a-3p	-0.345042	5.05948	0.0857442	0.769659	1
hsa-miR-218-5p	-0.941139	0.332672	0.083317	0.772852	1
hsa-miR-4677-3p	-0.274974	2.49026	0.0832692	0.772915	1
hsa-miR-6818-5p	0.958816	-0.36964	0.077543	0.780655	1
hsa-miR-584-3p	-0.294879	2.92505	0.0769217	0.781513	1
hsa-miR-769-3p	0.321682	1.87997	0.0762422	0.782456	1
hsa-miR-377-5p	0.815001	0.619071	0.0755963	0.783356	1
hsa-miR-181c-3p	0.362128	1.72467	0.0741828	0.785341	1
hsa-miR-101-5p	-0.269516	3.57114	0.0736922	0.786035	1
hsa-miR-499a-5p	-0.355068	1.41269	0.0713656	0.789359	1
hsa-miR-3120-3p	0.921785	-0.427159	0.0679375	0.794364	1
hsa-miR-5003-3p	0.921785	-0.427159	0.0679375	0.794364	1
hsa-miR-6861-3p	-0.627881	0.167599	0.0678389	0.79451	1
hsa-miR-7851-3p	0.891983	-0.301206	0.0670693	0.795653	1
hsa-miR-616-5p	-0.382104	0.855787	0.0654911	0.798019	1
hsa-miR-584-5p	0.174786	8.35704	0.0654252	0.798118	1
hsa-miR-1255a	0.369642	2.17229	0.0648108	0.799048	1
hsa-miR-4504	-0.225576	2.93891	0.0620193	0.803332	1
hsa-miR-188-5p	-0.296181	2.10984	0.0619757	0.8034	1
hsa-miR-769-5p	0.212554	6.9344	0.0617142	0.803807	1
hsa-miR-625-3p	0.207824	5.4861	0.0610766	0.804802	1
hsa-miR-363-5p	0.30847	1.70025	0.0603451	0.805951	1
hsa-miR-379-5p	-0.21763	4.21046	0.0576392	0.810267	1
hsa-miR-548t-5p	0.605578	0.115046	0.0573582	0.810721	1
hsa-miR-574-3p	0.185884	5.15821	0.0552052	0.814241	1
hsa-miR-106b-3p	0.144977	11.4342	0.0542709	0.815792	1
hsa-miR-323b-3p	-0.73021	0.167444	0.0516898	0.820149	1
hsa-miR-19b-1-5p	-0.496783	0.755997	0.0512523	0.820898	1
hsa-miR-144-3p	0.179641	13.5316	0.0508641	0.821566	1
hsa-miR-556-5p	-0.355003	0.874824	0.0501529	0.822797	1
hsa-miR-3667-5p	-0.328664	1.01751	0.0495439	0.823859	1
hsa-miR-6833-3p	-0.28966	1.59597	0.0482605	0.826118	1
hsa-miR-6513-5p	0.230524	2.53331	0.0482308	0.826171	1
hsa-miR-766-3p	0.224138	5.40826	0.0480052	0.826571	1
hsa-miR-223-5p	-0.203414	6.21239	0.0466588	0.828983	1
hsa-miR-505-3p	-0.169624	4.93098	0.0464953	0.829278	1
hsa-miR-4690-3p	0.205098	2.84407	0.0448092	0.832355	1
hsa-miR-4286	-0.18677	5.48797	0.0429837	0.835756	1
hsa-miR-1227-3p	0.255718	1.58225	0.0422902	0.837068	1
hsa-miR-6511b-3p	-0.399722	1.14952	0.0376941	0.846059	1
hsa-miR-299-3p	-0.646867	-0.579905	0.0356709	0.850197	1
hsa-miR-193b-3p	0.346472	2.20479	0.0342282	0.853222	1
hsa-miR-200a-3p	-0.554951	0.701538	0.0330668	0.855706	1
hsa-miR-1229-3p	0.564177	0.152664	0.0307411	0.860819	1
hsa-miR-4318	-0.222214	1.50827	0.030498	0.861365	1
hsa-miR-362-5p	0.134042	7.51847	0.0299813	0.862533	1
hsa-miR-22-5p	0.144052	5.65374	0.0287107	0.865449	1
hsa-miR-3127-3p	0.57563	-0.551409	0.0282475	0.866528	1
hsa-miR-142-3p	-0.125389	11.1022	0.0281955	0.86665	1
hsa-miR-3130-3p	0.542554	0.0785493	0.0275962	0.868062	1
hsa-miR-607	0.261643	0.758308	0.0273178	0.868723	1
hsa-miR-3194-3p	0.547879	-0.0547477	0.0265901	0.870468	1
hsa-miR-29b-1-5p	-0.5582	-0.551383	0.0253049	0.87361	1
hsa-miR-5193	-0.539034	-0.354577	0.0246292	0.875295	1
hsa-miR-532-5p	0.100164	10.6526	0.0243984	0.875875	1
hsa-miR-1185-1-3p	0.196627	1.88235	0.0237578	0.877503	1
hsa-miR-497-5p	0.520613	-0.140825	0.0231089	0.879174	1
hsa-miR-561-3p	0.516495	-0.0138739	0.0230906	0.879222	1
hsa-miR-193a-3p	0.469244	0.22441	0.0218925	0.882373	1
hsa-miR-181a-3p	-0.110639	5.10292	0.021434	0.883603	1
hsa-miR-186-3p	-0.172683	2.13328	0.0207494	0.885464	1
hsa-miR-3173-5p	-0.1856	1.53123	0.020603	0.885866	1
hsa-miR-301b-3p	0.487262	-0.400305	0.0201634	0.887082	1
hsa-miR-28-5p	0.100961	5.27197	0.018393	0.892121	1
hsa-miR-151b	-0.122681	5.52306	0.0175534	0.894597	1
hsa-miR-93-3p	0.0983257	6.63816	0.0175487	0.894611	1
hsa-miR-300	0.161211	3.57323	0.0172394	0.895539	1
hsa-miR-940	0.377811	0.772925	0.0171356	0.895852	1
hsa-miR-23b-3p	-0.0992672	6.69839	0.016518	0.897735	1
hsa-miR-6511a-3p	-0.133606	3.67419	0.0162662	0.898514	1
hsa-miR-7976	-0.0921824	6.04478	0.0158858	0.899701	1
hsa-miR-30c-1-3p	0.105405	3.26274	0.0152145	0.901832	1
hsa-miR-3135a	0.152196	1.97417	0.0151762	0.901955	1
hsa-miR-182-5p	0.079267	12.7357	0.0151713	0.901971	1
hsa-miR-219a-5p	-0.417832	-0.58207	0.0149131	0.902805	1
hsa-miR-6837-3p	-0.417832	-0.58207	0.0149131	0.902805	1
hsa-miR-323a-3p	0.256768	0.780528	0.013719	0.906759	1
hsa-miR-4479	0.275587	0.402407	0.0136516	0.906987	1
hsa-miR-629-3p	-0.232885	7.12178	0.0131423	0.90873	1
hsa-miR-3611	-0.226884	1.4632	0.0129258	0.909482	1
hsa-miR-212-5p	0.388399	-0.631242	0.0129199	0.909503	1
hsa-miR-152-5p	0.388399	-0.631242	0.0129199	0.909503	1
hsa-miR-486-5p	0.0657678	15.9903	0.0119393	0.912991	1
hsa-miR-6513-3p	-0.137688	1.78509	0.0115954	0.914248	1
hsa-miR-145-3p	-0.115839	2.40405	0.0105654	0.918131	1
hsa-miR-581	-0.163847	0.803948	0.0103765	0.918864	1
hsa-miR-660-3p	0.104263	3.03405	0.00983268	0.921011	1
hsa-miR-625-5p	-0.113149	1.81438	0.00964478	0.921767	1
hsa-miR-150-3p	-0.0882407	3.88463	0.00899095	0.924457	1
hsa-miR-2277-5p	0.113674	1.75768	0.00876009	0.925431	1
hsa-let-7i-5p	-0.0599268	15.4305	0.0086198	0.926028	1
hsa-miR-33a-5p	0.212798	0.463305	0.00837264	0.927094	1
hsa-miR-4433a-5p	0.0969136	4.9908	0.00836091	0.927145	1
hsa-miR-4306	0.0680081	7.3418	0.00800233	0.92872	1
hsa-miR-6783-5p	-0.112885	1.49285	0.00779509	0.929646	1
hsa-miR-582-3p	-0.087028	4.05706	0.00763033	0.930392	1
hsa-miR-98-3p	-0.296821	-0.542935	0.00752043	0.930894	1
hsa-miR-194-3p	-0.282119	-0.465775	0.00677804	0.934385	1
hsa-miR-6812-3p	-0.282119	-0.465775	0.00677804	0.934385	1
hsa-miR-6734-3p	-0.258122	-0.32303	0.00565434	0.940059	1
hsa-miR-4707-3p	-0.138431	2.38465	0.00563243	0.940175	1
hsa-miR-1343-3p	-0.0961554	1.21906	0.00501549	0.943541	1
hsa-miR-4433b-3p	-0.124961	3.62554	0.00496331	0.943835	1
hsa-miR-20b-3p	0.0909878	1.35208	0.00461904	0.945815	1
hsa-miR-874-5p	-0.231404	-0.13268	0.0045907	0.945981	1
hsa-miR-532-3p	-0.0481676	6.62685	0.00452945	0.946342	1
hsa-miR-4645-3p	-0.192901	-0.584238	0.00318164	0.955018	1
hsa-miR-5000-3p	0.190878	-0.362092	0.00309752	0.955616	1
hsa-miR-4472	-0.11721	0.98214	0.00303711	0.956051	1
hsa-miR-2115-3p	0.12137	0.897192	0.00295851	0.956623	1
hsa-miR-18a-3p	-0.0405082	6.27344	0.00295223	0.956669	1
hsa-miR-6817-3p	0.173161	-0.715895	0.0025812	0.95948	1
hsa-miR-221-3p	-0.0325657	10.1596	0.00235905	0.961262	1
hsa-miR-3157-3p	-0.162977	-0.225533	0.00225051	0.962163	1
hsa-miR-486-3p	0.0291694	14.9651	0.00201707	0.964178	1
hsa-miR-183-5p	0.027533	10.9121	0.00191951	0.965054	1
hsa-miR-3605-3p	0.0443425	2.4517	0.00178066	0.966341	1
hsa-miR-7975	0.0413425	1.84134	0.00116748	0.972743	1
hsa-miR-4433b-5p	0.0835892	-0.260231	0.000593096	0.980571	1
hsa-miR-133a-5p	-0.082511	-0.195032	0.000576476	0.980845	1
hsa-miR-6881-3p	-0.0818588	-0.394528	0.000569578	0.98096	1
hsa-miR-6743-3p	-0.0812671	-0.54505	0.000563703	0.981058	1
hsa-miR-6894-3p	0.071694	0.296424	0.000526464	0.981694	1
hsa-miR-4755-3p	0.0303036	0.45764	0.000339918	0.98529	1
hsa-miR-548al	-0.024118	1.11509	0.00027366	0.986801	1
hsa-miR-6786-3p	0.0521471	-0.760221	0.000235101	0.987767	1
hsa-miR-6820-3p	0.0521471	-0.760221	0.000235101	0.987767	1
hsa-miR-6747-3p	-0.0201844	0.878005	0.00018138	0.989255	1
hsa-miR-495-3p	0.0153255	3.70354	0.000164658	0.989762	1
hsa-miR-203a-3p	0.0405383	-0.670637	0.000141524	0.990508	1
hsa-miR-6793-3p	-0.031735	0.297652	0.000103075	0.9919	1
hsa-miR-210-5p	0.0244017	0.745618	7.1e-05	0.993276	1
hsa-miR-138-5p	-0.0200655	0.0591931	3.75e-05	0.995115	1
hsa-miR-3677-3p	-0.0200655	0.0591931	3.75e-05	0.995115	1
hsa-miR-3157-5p	-0.00681105	0.663416	5.38e-06	0.99815	1
hsa-miR-146a-3p	0.00241526	1.67147	4.13e-06	0.998378	1
hsa-let-7a-2-3p	0	-2.43338	0	1	1
hsa-let-7c-3p	0	-2.43338	0	1	1
hsa-let-7e-3p	0	-2.43338	0	1	1
hsa-let-7f-2-3p	0	-2.43338	0	1	1
hsa-miR-19a-5p	0	-2.43338	0	1	1
hsa-miR-19b-2-5p	0	-2.43338	0	1	1
hsa-miR-29a-5p	0	-2.43338	0	1	1
hsa-miR-92a-2-5p	0	-2.43338	0	1	1
hsa-miR-95-5p	0	-2.43338	0	1	1
hsa-miR-99a-3p	0	-2.43338	0	1	1
hsa-miR-100-3p	0	-2.43338	0	1	1
hsa-miR-105-5p	0	-2.43338	0	1	1
hsa-miR-105-3p	0	-2.43338	0	1	1
hsa-miR-198	0	-2.43338	0	1	1
hsa-miR-208a-5p	0	-2.43338	0	1	1
hsa-miR-208a-3p	0	-2.43338	0	1	1
hsa-miR-7-2-3p	0	-2.43338	0	1	1
hsa-miR-10a-3p	0	-2.43338	0	1	1
hsa-miR-10b-3p	0	-2.43338	0	1	1
hsa-miR-34a-3p	0	-2.43338	0	1	1
hsa-miR-181b-3p	0	-2.43338	0	1	1
hsa-miR-187-5p	0	-2.43338	0	1	1
hsa-miR-196a-3p	0	-2.43338	0	1	1
hsa-miR-199b-3p	0	-2.43338	0	1	1
hsa-miR-203a-5p	0	-2.43338	0	1	1
hsa-miR-204-3p	0	-2.43338	0	1	1
hsa-miR-205-5p	0	-2.43338	0	1	1
hsa-miR-205-3p	0	-2.43338	0	1	1
hsa-miR-211-5p	0	-2.43338	0	1	1
hsa-miR-211-3p	0	-2.43338	0	1	1
hsa-miR-212-3p	0	-2.43338	0	1	1
hsa-miR-214-3p	0	-2.43338	0	1	1
hsa-miR-215-3p	0	-2.43338	0	1	1
hsa-miR-216a-5p	0	-2.43338	0	1	1
hsa-miR-216a-3p	0	-2.43338	0	1	1
hsa-miR-217	0	-2.43338	0	1	1
hsa-miR-218-1-3p	0	-2.43338	0	1	1
hsa-miR-218-2-3p	0	-2.43338	0	1	1
hsa-miR-222-5p	0	-2.43338	0	1	1
hsa-miR-224-3p	0	-2.43338	0	1	1
hsa-miR-200b-5p	0	-2.43338	0	1	1
hsa-miR-124-5p	0	-2.43338	0	1	1
hsa-miR-124-3p	0	-2.43338	0	1	1
hsa-miR-125b-1-3p	0	-2.43338	0	1	1
hsa-miR-130a-5p	0	-2.43338	0	1	1
hsa-miR-135a-3p	0	-2.43338	0	1	1
hsa-miR-137	0	-2.43338	0	1	1
hsa-miR-138-2-3p	0	-2.43338	0	1	1
hsa-miR-141-5p	0	-2.43338	0	1	1
hsa-miR-153-3p	0	-2.43338	0	1	1
hsa-miR-153-5p	0	-2.43338	0	1	1
hsa-miR-125b-2-3p	0	-2.43338	0	1	1
hsa-miR-129-2-3p	0	-2.43338	0	1	1
hsa-miR-134-3p	0	-2.43338	0	1	1
hsa-miR-138-1-3p	0	-2.43338	0	1	1
hsa-miR-149-5p	0	-2.43338	0	1	1
hsa-miR-149-3p	0	-2.43338	0	1	1
hsa-miR-154-3p	0	-2.43338	0	1	1
hsa-miR-188-3p	0	-2.43338	0	1	1
hsa-miR-190a-3p	0	-2.43338	0	1	1
hsa-miR-195-3p	0	-2.43338	0	1	1
hsa-miR-206	0	-2.43338	0	1	1
hsa-miR-200c-5p	0	-2.43338	0	1	1
hsa-miR-1-5p	0	-2.43338	0	1	1
hsa-miR-155-3p	0	-2.43338	0	1	1
hsa-miR-128-2-5p	0	-2.43338	0	1	1
hsa-miR-200a-5p	0	-2.43338	0	1	1
hsa-miR-302a-5p	0	-2.43338	0	1	1
hsa-miR-302a-3p	0	-2.43338	0	1	1
hsa-miR-219a-2-3p	0	-2.43338	0	1	1
hsa-miR-34b-3p	0	-2.43338	0	1	1
hsa-miR-34c-3p	0	-2.43338	0	1	1
hsa-miR-296-5p	0	-2.43338	0	1	1
hsa-miR-365a-5p	0	-2.43338	0	1	1
hsa-miR-365b-5p	0	-2.43338	0	1	1
hsa-miR-365b-3p	0	-2.43338	0	1	1
hsa-miR-302b-5p	0	-2.43338	0	1	1
hsa-miR-302b-3p	0	-2.43338	0	1	1
hsa-miR-302c-5p	0	-2.43338	0	1	1
hsa-miR-302c-3p	0	-2.43338	0	1	1
hsa-miR-302d-5p	0	-2.43338	0	1	1
hsa-miR-302d-3p	0	-2.43338	0	1	1
hsa-miR-367-5p	0	-2.43338	0	1	1
hsa-miR-367-3p	0	-2.43338	0	1	1
hsa-miR-376c-5p	0	-2.43338	0	1	1
hsa-miR-369-5p	0	-2.43338	0	1	1
hsa-miR-370-5p	0	-2.43338	0	1	1
hsa-miR-371a-5p	0	-2.43338	0	1	1
hsa-miR-371a-3p	0	-2.43338	0	1	1
hsa-miR-372-5p	0	-2.43338	0	1	1
hsa-miR-372-3p	0	-2.43338	0	1	1
hsa-miR-373-5p	0	-2.43338	0	1	1
hsa-miR-373-3p	0	-2.43338	0	1	1
hsa-miR-376a-5p	0	-2.43338	0	1	1
hsa-miR-380-5p	0	-2.43338	0	1	1
hsa-miR-380-3p	0	-2.43338	0	1	1
hsa-miR-381-5p	0	-2.43338	0	1	1
hsa-miR-383-5p	0	-2.43338	0	1	1
hsa-miR-383-3p	0	-2.43338	0	1	1
hsa-miR-328-5p	0	-2.43338	0	1	1
hsa-miR-323a-5p	0	-2.43338	0	1	1
hsa-miR-135b-5p	0	-2.43338	0	1	1
hsa-miR-135b-3p	0	-2.43338	0	1	1
hsa-miR-133b	0	-2.43338	0	1	1
hsa-miR-325	0	-2.43338	0	1	1
hsa-miR-345-3p	0	-2.43338	0	1	1
hsa-miR-346	0	-2.43338	0	1	1
hsa-miR-384	0	-2.43338	0	1	1
hsa-miR-18b-3p	0	-2.43338	0	1	1
hsa-miR-448	0	-2.43338	0	1	1
hsa-miR-429	0	-2.43338	0	1	1
hsa-miR-449a	0	-2.43338	0	1	1
hsa-miR-450a-1-3p	0	-2.43338	0	1	1
hsa-miR-433-5p	0	-2.43338	0	1	1
hsa-miR-329-5p	0	-2.43338	0	1	1
hsa-miR-452-3p	0	-2.43338	0	1	1
hsa-miR-412-5p	0	-2.43338	0	1	1
hsa-miR-412-3p	0	-2.43338	0	1	1
hsa-miR-410-5p	0	-2.43338	0	1	1
hsa-miR-376b-5p	0	-2.43338	0	1	1
hsa-miR-376b-3p	0	-2.43338	0	1	1
hsa-miR-483-3p	0	-2.43338	0	1	1
hsa-miR-487a-5p	0	-2.43338	0	1	1
hsa-miR-488-5p	0	-2.43338	0	1	1
hsa-miR-488-3p	0	-2.43338	0	1	1
hsa-miR-489-5p	0	-2.43338	0	1	1
hsa-miR-489-3p	0	-2.43338	0	1	1
hsa-miR-490-5p	0	-2.43338	0	1	1
hsa-miR-491-3p	0	-2.43338	0	1	1
hsa-miR-511-5p	0	-2.43338	0	1	1
hsa-miR-511-3p	0	-2.43338	0	1	1
hsa-miR-202-5p	0	-2.43338	0	1	1
hsa-miR-202-3p	0	-2.43338	0	1	1
hsa-miR-492	0	-2.43338	0	1	1
hsa-miR-494-5p	0	-2.43338	0	1	1
hsa-miR-495-5p	0	-2.43338	0	1	1
hsa-miR-497-3p	0	-2.43338	0	1	1
hsa-miR-181d-3p	0	-2.43338	0	1	1
hsa-miR-512-5p	0	-2.43338	0	1	1
hsa-miR-512-3p	0	-2.43338	0	1	1
hsa-miR-498	0	-2.43338	0	1	1
hsa-miR-520e	0	-2.43338	0	1	1
hsa-miR-515-5p	0	-2.43338	0	1	1
hsa-miR-515-3p	0	-2.43338	0	1	1
hsa-miR-519e-5p	0	-2.43338	0	1	1
hsa-miR-519e-3p	0	-2.43338	0	1	1
hsa-miR-520f-5p	0	-2.43338	0	1	1
hsa-miR-520f-3p	0	-2.43338	0	1	1
hsa-miR-519c-5p	0	-2.43338	0	1	1
hsa-miR-519c-3p	0	-2.43338	0	1	1
hsa-miR-520a-5p	0	-2.43338	0	1	1
hsa-miR-520a-3p	0	-2.43338	0	1	1
hsa-miR-526b-5p	0	-2.43338	0	1	1
hsa-miR-526b-3p	0	-2.43338	0	1	1
hsa-miR-519b-5p	0	-2.43338	0	1	1
hsa-miR-519b-3p	0	-2.43338	0	1	1
hsa-miR-525-5p	0	-2.43338	0	1	1
hsa-miR-525-3p	0	-2.43338	0	1	1
hsa-miR-523-5p	0	-2.43338	0	1	1
hsa-miR-523-3p	0	-2.43338	0	1	1
hsa-miR-518f-5p	0	-2.43338	0	1	1
hsa-miR-518f-3p	0	-2.43338	0	1	1
hsa-miR-520b	0	-2.43338	0	1	1
hsa-miR-518b	0	-2.43338	0	1	1
hsa-miR-526a	0	-2.43338	0	1	1
hsa-miR-520c-5p	0	-2.43338	0	1	1
hsa-miR-520c-3p	0	-2.43338	0	1	1
hsa-miR-518c-5p	0	-2.43338	0	1	1
hsa-miR-518c-3p	0	-2.43338	0	1	1
hsa-miR-524-5p	0	-2.43338	0	1	1
hsa-miR-524-3p	0	-2.43338	0	1	1
hsa-miR-517-5p	0	-2.43338	0	1	1
hsa-miR-517a-3p	0	-2.43338	0	1	1
hsa-miR-519d-5p	0	-2.43338	0	1	1
hsa-miR-519d-3p	0	-2.43338	0	1	1
hsa-miR-521	0	-2.43338	0	1	1
hsa-miR-520d-5p	0	-2.43338	0	1	1
hsa-miR-520d-3p	0	-2.43338	0	1	1
hsa-miR-517b-3p	0	-2.43338	0	1	1
hsa-miR-520g-5p	0	-2.43338	0	1	1
hsa-miR-520g-3p	0	-2.43338	0	1	1
hsa-miR-516b-5p	0	-2.43338	0	1	1
hsa-miR-516b-3p	0	-2.43338	0	1	1
hsa-miR-518e-5p	0	-2.43338	0	1	1
hsa-miR-518e-3p	0	-2.43338	0	1	1
hsa-miR-518a-3p	0	-2.43338	0	1	1
hsa-miR-518d-5p	0	-2.43338	0	1	1
hsa-miR-518d-3p	0	-2.43338	0	1	1
hsa-miR-517c-3p	0	-2.43338	0	1	1
hsa-miR-520h	0	-2.43338	0	1	1
hsa-miR-522-5p	0	-2.43338	0	1	1
hsa-miR-522-3p	0	-2.43338	0	1	1
hsa-miR-519a-5p	0	-2.43338	0	1	1
hsa-miR-519a-3p	0	-2.43338	0	1	1
hsa-miR-527	0	-2.43338	0	1	1
hsa-miR-516a-5p	0	-2.43338	0	1	1
hsa-miR-516a-3p	0	-2.43338	0	1	1
hsa-miR-499a-3p	0	-2.43338	0	1	1
hsa-miR-503-3p	0	-2.43338	0	1	1
hsa-miR-504-3p	0	-2.43338	0	1	1
hsa-miR-513a-5p	0	-2.43338	0	1	1
hsa-miR-513a-3p	0	-2.43338	0	1	1
hsa-miR-506-5p	0	-2.43338	0	1	1
hsa-miR-506-3p	0	-2.43338	0	1	1
hsa-miR-507	0	-2.43338	0	1	1
hsa-miR-508-5p	0	-2.43338	0	1	1
hsa-miR-508-3p	0	-2.43338	0	1	1
hsa-miR-509-5p	0	-2.43338	0	1	1
hsa-miR-509-3p	0	-2.43338	0	1	1
hsa-miR-510-5p	0	-2.43338	0	1	1
hsa-miR-510-3p	0	-2.43338	0	1	1
hsa-miR-514a-5p	0	-2.43338	0	1	1
hsa-miR-544a	0	-2.43338	0	1	1
hsa-miR-545-5p	0	-2.43338	0	1	1
hsa-miR-545-3p	0	-2.43338	0	1	1
hsa-miR-376a-2-5p	0	-2.43338	0	1	1
hsa-miR-487b-5p	0	-2.43338	0	1	1
hsa-miR-552-5p	0	-2.43338	0	1	1
hsa-miR-552-3p	0	-2.43338	0	1	1
hsa-miR-553	0	-2.43338	0	1	1
hsa-miR-554	0	-2.43338	0	1	1
hsa-miR-555	0	-2.43338	0	1	1
hsa-miR-556-3p	0	-2.43338	0	1	1
hsa-miR-557	0	-2.43338	0	1	1
hsa-miR-558	0	-2.43338	0	1	1
hsa-miR-559	0	-2.43338	0	1	1
hsa-miR-561-5p	0	-2.43338	0	1	1
hsa-miR-562	0	-2.43338	0	1	1
hsa-miR-563	0	-2.43338	0	1	1
hsa-miR-564	0	-2.43338	0	1	1
hsa-miR-566	0	-2.43338	0	1	1
hsa-miR-567	0	-2.43338	0	1	1
hsa-miR-568	0	-2.43338	0	1	1
hsa-miR-551b-5p	0	-2.43338	0	1	1
hsa-miR-551b-3p	0	-2.43338	0	1	1
hsa-miR-569	0	-2.43338	0	1	1
hsa-miR-570-5p	0	-2.43338	0	1	1
hsa-miR-571	0	-2.43338	0	1	1
hsa-miR-572	0	-2.43338	0	1	1
hsa-miR-573	0	-2.43338	0	1	1
hsa-miR-575	0	-2.43338	0	1	1
hsa-miR-577	0	-2.43338	0	1	1
hsa-miR-578	0	-2.43338	0	1	1
hsa-miR-580-5p	0	-2.43338	0	1	1
hsa-miR-583	0	-2.43338	0	1	1
hsa-miR-585-5p	0	-2.43338	0	1	1
hsa-miR-585-3p	0	-2.43338	0	1	1
hsa-miR-586	0	-2.43338	0	1	1
hsa-miR-587	0	-2.43338	0	1	1
hsa-miR-548b-5p	0	-2.43338	0	1	1
hsa-miR-548b-3p	0	-2.43338	0	1	1
hsa-miR-588	0	-2.43338	0	1	1
hsa-miR-591	0	-2.43338	0	1	1
hsa-miR-592	0	-2.43338	0	1	1
hsa-miR-593-5p	0	-2.43338	0	1	1
hsa-miR-593-3p	0	-2.43338	0	1	1
hsa-miR-595	0	-2.43338	0	1	1
hsa-miR-596	0	-2.43338	0	1	1
hsa-miR-597-5p	0	-2.43338	0	1	1
hsa-miR-597-3p	0	-2.43338	0	1	1
hsa-miR-598-5p	0	-2.43338	0	1	1
hsa-miR-599	0	-2.43338	0	1	1
hsa-miR-600	0	-2.43338	0	1	1
hsa-miR-601	0	-2.43338	0	1	1
hsa-miR-602	0	-2.43338	0	1	1
hsa-miR-603	0	-2.43338	0	1	1
hsa-miR-604	0	-2.43338	0	1	1
hsa-miR-605-5p	0	-2.43338	0	1	1
hsa-miR-605-3p	0	-2.43338	0	1	1
hsa-miR-606	0	-2.43338	0	1	1
hsa-miR-608	0	-2.43338	0	1	1
hsa-miR-609	0	-2.43338	0	1	1
hsa-miR-611	0	-2.43338	0	1	1
hsa-miR-612	0	-2.43338	0	1	1
hsa-miR-613	0	-2.43338	0	1	1
hsa-miR-614	0	-2.43338	0	1	1
hsa-miR-615-5p	0	-2.43338	0	1	1
hsa-miR-615-3p	0	-2.43338	0	1	1
hsa-miR-616-3p	0	-2.43338	0	1	1
hsa-miR-548c-5p	0	-2.43338	0	1	1
hsa-miR-548c-3p	0	-2.43338	0	1	1
hsa-miR-617	0	-2.43338	0	1	1
hsa-miR-619-3p	0	-2.43338	0	1	1
hsa-miR-620	0	-2.43338	0	1	1
hsa-miR-621	0	-2.43338	0	1	1
hsa-miR-622	0	-2.43338	0	1	1
hsa-miR-623	0	-2.43338	0	1	1
hsa-miR-624-3p	0	-2.43338	0	1	1
hsa-miR-626	0	-2.43338	0	1	1
hsa-miR-630	0	-2.43338	0	1	1
hsa-miR-631	0	-2.43338	0	1	1
hsa-miR-33b-3p	0	-2.43338	0	1	1
hsa-miR-632	0	-2.43338	0	1	1
hsa-miR-633	0	-2.43338	0	1	1
hsa-miR-634	0	-2.43338	0	1	1
hsa-miR-635	0	-2.43338	0	1	1
hsa-miR-637	0	-2.43338	0	1	1
hsa-miR-638	0	-2.43338	0	1	1
hsa-miR-639	0	-2.43338	0	1	1
hsa-miR-640	0	-2.43338	0	1	1
hsa-miR-642a-5p	0	-2.43338	0	1	1
hsa-miR-644a	0	-2.43338	0	1	1
hsa-miR-645	0	-2.43338	0	1	1
hsa-miR-646	0	-2.43338	0	1	1
hsa-miR-647	0	-2.43338	0	1	1
hsa-miR-648	0	-2.43338	0	1	1
hsa-miR-649	0	-2.43338	0	1	1
hsa-miR-650	0	-2.43338	0	1	1
hsa-miR-651-3p	0	-2.43338	0	1	1
hsa-miR-548d-5p	0	-2.43338	0	1	1
hsa-miR-548d-3p	0	-2.43338	0	1	1
hsa-miR-661	0	-2.43338	0	1	1
hsa-miR-662	0	-2.43338	0	1	1
hsa-miR-663a	0	-2.43338	0	1	1
hsa-miR-449b-5p	0	-2.43338	0	1	1
hsa-miR-449b-3p	0	-2.43338	0	1	1
hsa-miR-653-5p	0	-2.43338	0	1	1
hsa-miR-653-3p	0	-2.43338	0	1	1
hsa-miR-411-3p	0	-2.43338	0	1	1
hsa-miR-655-5p	0	-2.43338	0	1	1
hsa-miR-656-5p	0	-2.43338	0	1	1
hsa-miR-656-3p	0	-2.43338	0	1	1
hsa-miR-549a	0	-2.43338	0	1	1
hsa-miR-657	0	-2.43338	0	1	1
hsa-miR-658	0	-2.43338	0	1	1
hsa-miR-758-5p	0	-2.43338	0	1	1
hsa-miR-1264	0	-2.43338	0	1	1
hsa-miR-668-5p	0	-2.43338	0	1	1
hsa-miR-668-3p	0	-2.43338	0	1	1
hsa-miR-767-5p	0	-2.43338	0	1	1
hsa-miR-767-3p	0	-2.43338	0	1	1
hsa-miR-1224-3p	0	-2.43338	0	1	1
hsa-miR-1296-3p	0	-2.43338	0	1	1
hsa-miR-1468-3p	0	-2.43338	0	1	1
hsa-miR-1323	0	-2.43338	0	1	1
hsa-miR-1271-3p	0	-2.43338	0	1	1
hsa-miR-1301-5p	0	-2.43338	0	1	1
hsa-miR-1185-5p	0	-2.43338	0	1	1
hsa-miR-1185-2-3p	0	-2.43338	0	1	1
hsa-miR-449c-5p	0	-2.43338	0	1	1
hsa-miR-449c-3p	0	-2.43338	0	1	1
hsa-miR-1283	0	-2.43338	0	1	1
hsa-miR-762	0	-2.43338	0	1	1
hsa-miR-802	0	-2.43338	0	1	1
hsa-miR-670-5p	0	-2.43338	0	1	1
hsa-miR-670-3p	0	-2.43338	0	1	1
hsa-miR-1298-3p	0	-2.43338	0	1	1
hsa-miR-2113	0	-2.43338	0	1	1
hsa-miR-761	0	-2.43338	0	1	1
hsa-miR-764	0	-2.43338	0	1	1
hsa-miR-759	0	-2.43338	0	1	1
hsa-miR-765	0	-2.43338	0	1	1
hsa-miR-770-5p	0	-2.43338	0	1	1
hsa-miR-675-5p	0	-2.43338	0	1	1
hsa-miR-675-3p	0	-2.43338	0	1	1
hsa-miR-298	0	-2.43338	0	1	1
hsa-miR-891a-5p	0	-2.43338	0	1	1
hsa-miR-891a-3p	0	-2.43338	0	1	1
hsa-miR-892a	0	-2.43338	0	1	1
hsa-miR-450b-3p	0	-2.43338	0	1	1
hsa-miR-890	0	-2.43338	0	1	1
hsa-miR-891b	0	-2.43338	0	1	1
hsa-miR-888-5p	0	-2.43338	0	1	1
hsa-miR-888-3p	0	-2.43338	0	1	1
hsa-miR-892b	0	-2.43338	0	1	1
hsa-miR-541-5p	0	-2.43338	0	1	1
hsa-miR-541-3p	0	-2.43338	0	1	1
hsa-miR-889-5p	0	-2.43338	0	1	1
hsa-miR-875-5p	0	-2.43338	0	1	1
hsa-miR-875-3p	0	-2.43338	0	1	1
hsa-miR-876-5p	0	-2.43338	0	1	1
hsa-miR-876-3p	0	-2.43338	0	1	1
hsa-miR-708-3p	0	-2.43338	0	1	1
hsa-miR-885-3p	0	-2.43338	0	1	1
hsa-miR-887-5p	0	-2.43338	0	1	1
hsa-miR-887-3p	0	-2.43338	0	1	1
hsa-miR-665	0	-2.43338	0	1	1
hsa-miR-301b-5p	0	-2.43338	0	1	1
hsa-miR-216b-5p	0	-2.43338	0	1	1
hsa-miR-216b-3p	0	-2.43338	0	1	1
hsa-miR-208b-5p	0	-2.43338	0	1	1
hsa-miR-208b-3p	0	-2.43338	0	1	1
hsa-miR-920	0	-2.43338	0	1	1
hsa-miR-921	0	-2.43338	0	1	1
hsa-miR-922	0	-2.43338	0	1	1
hsa-miR-924	0	-2.43338	0	1	1
hsa-miR-509-3-5p	0	-2.43338	0	1	1
hsa-miR-934	0	-2.43338	0	1	1
hsa-miR-935	0	-2.43338	0	1	1
hsa-miR-936	0	-2.43338	0	1	1
hsa-miR-937-5p	0	-2.43338	0	1	1
hsa-miR-938	0	-2.43338	0	1	1
hsa-miR-939-3p	0	-2.43338	0	1	1
hsa-miR-944	0	-2.43338	0	1	1
hsa-miR-297	0	-2.43338	0	1	1
hsa-miR-1178-5p	0	-2.43338	0	1	1
hsa-miR-1178-3p	0	-2.43338	0	1	1
hsa-miR-1179	0	-2.43338	0	1	1
hsa-miR-1180-5p	0	-2.43338	0	1	1
hsa-miR-1181	0	-2.43338	0	1	1
hsa-miR-1182	0	-2.43338	0	1	1
hsa-miR-1183	0	-2.43338	0	1	1
hsa-miR-1184	0	-2.43338	0	1	1
hsa-miR-1225-5p	0	-2.43338	0	1	1
hsa-miR-1225-3p	0	-2.43338	0	1	1
hsa-miR-1226-5p	0	-2.43338	0	1	1
hsa-miR-1227-5p	0	-2.43338	0	1	1
hsa-miR-1229-5p	0	-2.43338	0	1	1
hsa-miR-1231	0	-2.43338	0	1	1
hsa-miR-1233-5p	0	-2.43338	0	1	1
hsa-miR-1233-3p	0	-2.43338	0	1	1
hsa-miR-1236-5p	0	-2.43338	0	1	1
hsa-miR-1236-3p	0	-2.43338	0	1	1
hsa-miR-1237-5p	0	-2.43338	0	1	1
hsa-miR-1237-3p	0	-2.43338	0	1	1
hsa-miR-1238-5p	0	-2.43338	0	1	1
hsa-miR-1238-3p	0	-2.43338	0	1	1
hsa-miR-1200	0	-2.43338	0	1	1
hsa-miR-1202	0	-2.43338	0	1	1
hsa-miR-1203	0	-2.43338	0	1	1
hsa-miR-663b	0	-2.43338	0	1	1
hsa-miR-1204	0	-2.43338	0	1	1
hsa-miR-1205	0	-2.43338	0	1	1
hsa-miR-1206	0	-2.43338	0	1	1
hsa-miR-1207-5p	0	-2.43338	0	1	1
hsa-miR-1207-3p	0	-2.43338	0	1	1
hsa-miR-1208	0	-2.43338	0	1	1
hsa-miR-548e-5p	0	-2.43338	0	1	1
hsa-miR-548j-5p	0	-2.43338	0	1	1
hsa-miR-1286	0	-2.43338	0	1	1
hsa-miR-1287-3p	0	-2.43338	0	1	1
hsa-miR-548k	0	-2.43338	0	1	1
hsa-miR-1293	0	-2.43338	0	1	1
hsa-miR-1295a	0	-2.43338	0	1	1
hsa-miR-548l	0	-2.43338	0	1	1
hsa-miR-1302	0	-2.43338	0	1	1
hsa-miR-1305	0	-2.43338	0	1	1
hsa-miR-1243	0	-2.43338	0	1	1
hsa-miR-1244	0	-2.43338	0	1	1
hsa-miR-1245a	0	-2.43338	0	1	1
hsa-miR-1247-5p	0	-2.43338	0	1	1
hsa-miR-1247-3p	0	-2.43338	0	1	1
hsa-miR-1248	0	-2.43338	0	1	1
hsa-miR-1249-5p	0	-2.43338	0	1	1
hsa-miR-1249-3p	0	-2.43338	0	1	1
hsa-miR-1250-3p	0	-2.43338	0	1	1
hsa-miR-1251-5p	0	-2.43338	0	1	1
hsa-miR-1251-3p	0	-2.43338	0	1	1
hsa-miR-1253	0	-2.43338	0	1	1
hsa-miR-1256	0	-2.43338	0	1	1
hsa-miR-1257	0	-2.43338	0	1	1
hsa-miR-1258	0	-2.43338	0	1	1
hsa-miR-1260a	0	-2.43338	0	1	1
hsa-miR-548g-5p	0	-2.43338	0	1	1
hsa-miR-1262	0	-2.43338	0	1	1
hsa-miR-1263	0	-2.43338	0	1	1
hsa-miR-548n	0	-2.43338	0	1	1
hsa-miR-548m	0	-2.43338	0	1	1
hsa-miR-1265	0	-2.43338	0	1	1
hsa-miR-1266-5p	0	-2.43338	0	1	1
hsa-miR-1266-3p	0	-2.43338	0	1	1
hsa-miR-1267	0	-2.43338	0	1	1
hsa-miR-1269a	0	-2.43338	0	1	1
hsa-miR-1272	0	-2.43338	0	1	1
hsa-miR-1273a	0	-2.43338	0	1	1
hsa-miR-548h-3p	0	-2.43338	0	1	1
hsa-miR-1276	0	-2.43338	0	1	1
hsa-miR-302e	0	-2.43338	0	1	1
hsa-miR-302f	0	-2.43338	0	1	1
hsa-miR-1277-5p	0	-2.43338	0	1	1
hsa-miR-548i	0	-2.43338	0	1	1
hsa-miR-1279	0	-2.43338	0	1	1
hsa-miR-1281	0	-2.43338	0	1	1
hsa-miR-1282	0	-2.43338	0	1	1
hsa-miR-1288-5p	0	-2.43338	0	1	1
hsa-miR-1292-3p	0	-2.43338	0	1	1
hsa-miR-1252-5p	0	-2.43338	0	1	1
hsa-miR-1252-3p	0	-2.43338	0	1	1
hsa-miR-513b-5p	0	-2.43338	0	1	1
hsa-miR-513b-3p	0	-2.43338	0	1	1
hsa-miR-513c-5p	0	-2.43338	0	1	1
hsa-miR-513c-3p	0	-2.43338	0	1	1
hsa-miR-1321	0	-2.43338	0	1	1
hsa-miR-1322	0	-2.43338	0	1	1
hsa-miR-1324	0	-2.43338	0	1	1
hsa-miR-1469	0	-2.43338	0	1	1
hsa-miR-1470	0	-2.43338	0	1	1
hsa-miR-1471	0	-2.43338	0	1	1
hsa-miR-1537-5p	0	-2.43338	0	1	1
hsa-miR-1537-3p	0	-2.43338	0	1	1
hsa-miR-1539	0	-2.43338	0	1	1
hsa-miR-1825	0	-2.43338	0	1	1
hsa-miR-1908-3p	0	-2.43338	0	1	1
hsa-miR-1909-5p	0	-2.43338	0	1	1
hsa-miR-1909-3p	0	-2.43338	0	1	1
hsa-miR-1910-5p	0	-2.43338	0	1	1
hsa-miR-1910-3p	0	-2.43338	0	1	1
hsa-miR-1911-5p	0	-2.43338	0	1	1
hsa-miR-1911-3p	0	-2.43338	0	1	1
hsa-miR-1912	0	-2.43338	0	1	1
hsa-miR-1913	0	-2.43338	0	1	1
hsa-miR-1914-5p	0	-2.43338	0	1	1
hsa-miR-1914-3p	0	-2.43338	0	1	1
hsa-miR-1915-5p	0	-2.43338	0	1	1
hsa-miR-1915-3p	0	-2.43338	0	1	1
hsa-miR-1973	0	-2.43338	0	1	1
hsa-miR-2052	0	-2.43338	0	1	1
hsa-miR-2053	0	-2.43338	0	1	1
hsa-miR-2054	0	-2.43338	0	1	1
hsa-miR-2114-5p	0	-2.43338	0	1	1
hsa-miR-2114-3p	0	-2.43338	0	1	1
hsa-miR-2116-5p	0	-2.43338	0	1	1
hsa-miR-2116-3p	0	-2.43338	0	1	1
hsa-miR-2117	0	-2.43338	0	1	1
hsa-miR-2276-5p	0	-2.43338	0	1	1
hsa-miR-2681-5p	0	-2.43338	0	1	1
hsa-miR-2681-3p	0	-2.43338	0	1	1
hsa-miR-2682-5p	0	-2.43338	0	1	1
hsa-miR-2682-3p	0	-2.43338	0	1	1
hsa-miR-711	0	-2.43338	0	1	1
hsa-miR-718	0	-2.43338	0	1	1
hsa-miR-2861	0	-2.43338	0	1	1
hsa-miR-2909	0	-2.43338	0	1	1
hsa-miR-3115	0	-2.43338	0	1	1
hsa-miR-3116	0	-2.43338	0	1	1
hsa-miR-3117-5p	0	-2.43338	0	1	1
hsa-miR-3118	0	-2.43338	0	1	1
hsa-miR-3119	0	-2.43338	0	1	1
hsa-miR-3120-5p	0	-2.43338	0	1	1
hsa-miR-3121-5p	0	-2.43338	0	1	1
hsa-miR-3121-3p	0	-2.43338	0	1	1
hsa-miR-3123	0	-2.43338	0	1	1
hsa-miR-3124-3p	0	-2.43338	0	1	1
hsa-miR-548s	0	-2.43338	0	1	1
hsa-miR-3125	0	-2.43338	0	1	1
hsa-miR-3126-5p	0	-2.43338	0	1	1
hsa-miR-3126-3p	0	-2.43338	0	1	1
hsa-miR-3128	0	-2.43338	0	1	1
hsa-miR-3129-5p	0	-2.43338	0	1	1
hsa-miR-3129-3p	0	-2.43338	0	1	1
hsa-miR-3130-5p	0	-2.43338	0	1	1
hsa-miR-3131	0	-2.43338	0	1	1
hsa-miR-3132	0	-2.43338	0	1	1
hsa-miR-3134	0	-2.43338	0	1	1
hsa-miR-466	0	-2.43338	0	1	1
hsa-miR-3136-3p	0	-2.43338	0	1	1
hsa-miR-544b	0	-2.43338	0	1	1
hsa-miR-3137	0	-2.43338	0	1	1
hsa-miR-3138	0	-2.43338	0	1	1
hsa-miR-3139	0	-2.43338	0	1	1
hsa-miR-3140-5p	0	-2.43338	0	1	1
hsa-miR-548t-3p	0	-2.43338	0	1	1
hsa-miR-3141	0	-2.43338	0	1	1
hsa-miR-3142	0	-2.43338	0	1	1
hsa-miR-3143	0	-2.43338	0	1	1
hsa-miR-3144-5p	0	-2.43338	0	1	1
hsa-miR-3144-3p	0	-2.43338	0	1	1
hsa-miR-3145-5p	0	-2.43338	0	1	1
hsa-miR-3145-3p	0	-2.43338	0	1	1
hsa-miR-3146	0	-2.43338	0	1	1
hsa-miR-3147	0	-2.43338	0	1	1
hsa-miR-548v	0	-2.43338	0	1	1
hsa-miR-3148	0	-2.43338	0	1	1
hsa-miR-3149	0	-2.43338	0	1	1
hsa-miR-3151-5p	0	-2.43338	0	1	1
hsa-miR-3151-3p	0	-2.43338	0	1	1
hsa-miR-3152-5p	0	-2.43338	0	1	1
hsa-miR-3152-3p	0	-2.43338	0	1	1
hsa-miR-3153	0	-2.43338	0	1	1
hsa-miR-3154	0	-2.43338	0	1	1
hsa-miR-3155a	0	-2.43338	0	1	1
hsa-miR-3156-5p	0	-2.43338	0	1	1
hsa-miR-3156-3p	0	-2.43338	0	1	1
hsa-miR-3159	0	-2.43338	0	1	1
hsa-miR-3160-5p	0	-2.43338	0	1	1
hsa-miR-3160-3p	0	-2.43338	0	1	1
hsa-miR-3161	0	-2.43338	0	1	1
hsa-miR-3162-5p	0	-2.43338	0	1	1
hsa-miR-3162-3p	0	-2.43338	0	1	1
hsa-miR-3165	0	-2.43338	0	1	1
hsa-miR-3166	0	-2.43338	0	1	1
hsa-miR-3167	0	-2.43338	0	1	1
hsa-miR-3168	0	-2.43338	0	1	1
hsa-miR-3169	0	-2.43338	0	1	1
hsa-miR-3170	0	-2.43338	0	1	1
hsa-miR-3171	0	-2.43338	0	1	1
hsa-miR-1193	0	-2.43338	0	1	1
hsa-miR-323b-5p	0	-2.43338	0	1	1
hsa-miR-3174	0	-2.43338	0	1	1
hsa-miR-3175	0	-2.43338	0	1	1
hsa-miR-3177-5p	0	-2.43338	0	1	1
hsa-miR-3178	0	-2.43338	0	1	1
hsa-miR-3180-5p	0	-2.43338	0	1	1
hsa-miR-3180-3p	0	-2.43338	0	1	1
hsa-miR-548w	0	-2.43338	0	1	1
hsa-miR-3181	0	-2.43338	0	1	1
hsa-miR-3183	0	-2.43338	0	1	1
hsa-miR-3185	0	-2.43338	0	1	1
hsa-miR-3065-3p	0	-2.43338	0	1	1
hsa-miR-3186-5p	0	-2.43338	0	1	1
hsa-miR-3186-3p	0	-2.43338	0	1	1
hsa-miR-3187-5p	0	-2.43338	0	1	1
hsa-miR-3189-5p	0	-2.43338	0	1	1
hsa-miR-3189-3p	0	-2.43338	0	1	1
hsa-miR-3191-3p	0	-2.43338	0	1	1
hsa-miR-3192-3p	0	-2.43338	0	1	1
hsa-miR-3193	0	-2.43338	0	1	1
hsa-miR-3194-5p	0	-2.43338	0	1	1
hsa-miR-548x-5p	0	-2.43338	0	1	1
hsa-miR-548x-3p	0	-2.43338	0	1	1
hsa-miR-3197	0	-2.43338	0	1	1
hsa-miR-3199	0	-2.43338	0	1	1
hsa-miR-3201	0	-2.43338	0	1	1
hsa-miR-514b-5p	0	-2.43338	0	1	1
hsa-miR-514b-3p	0	-2.43338	0	1	1
hsa-miR-3202	0	-2.43338	0	1	1
hsa-miR-1273d	0	-2.43338	0	1	1
hsa-miR-4295	0	-2.43338	0	1	1
hsa-miR-4296	0	-2.43338	0	1	1
hsa-miR-4297	0	-2.43338	0	1	1
hsa-miR-378c	0	-2.43338	0	1	1
hsa-miR-4293	0	-2.43338	0	1	1
hsa-miR-4294	0	-2.43338	0	1	1
hsa-miR-4301	0	-2.43338	0	1	1
hsa-miR-4299	0	-2.43338	0	1	1
hsa-miR-4298	0	-2.43338	0	1	1
hsa-miR-4300	0	-2.43338	0	1	1
hsa-miR-4304	0	-2.43338	0	1	1
hsa-miR-4302	0	-2.43338	0	1	1
hsa-miR-4303	0	-2.43338	0	1	1
hsa-miR-4305	0	-2.43338	0	1	1
hsa-miR-4309	0	-2.43338	0	1	1
hsa-miR-4307	0	-2.43338	0	1	1
hsa-miR-4308	0	-2.43338	0	1	1
hsa-miR-4310	0	-2.43338	0	1	1
hsa-miR-4311	0	-2.43338	0	1	1
hsa-miR-4312	0	-2.43338	0	1	1
hsa-miR-4313	0	-2.43338	0	1	1
hsa-miR-4315	0	-2.43338	0	1	1
hsa-miR-4316	0	-2.43338	0	1	1
hsa-miR-4314	0	-2.43338	0	1	1
hsa-miR-4319	0	-2.43338	0	1	1
hsa-miR-4320	0	-2.43338	0	1	1
hsa-miR-4322	0	-2.43338	0	1	1
hsa-miR-4321	0	-2.43338	0	1	1
hsa-miR-4323	0	-2.43338	0	1	1
hsa-miR-4324	0	-2.43338	0	1	1
hsa-miR-4256	0	-2.43338	0	1	1
hsa-miR-4257	0	-2.43338	0	1	1
hsa-miR-4258	0	-2.43338	0	1	1
hsa-miR-4259	0	-2.43338	0	1	1
hsa-miR-4260	0	-2.43338	0	1	1
hsa-miR-4253	0	-2.43338	0	1	1
hsa-miR-4251	0	-2.43338	0	1	1
hsa-miR-4254	0	-2.43338	0	1	1
hsa-miR-4255	0	-2.43338	0	1	1
hsa-miR-4252	0	-2.43338	0	1	1
hsa-miR-4327	0	-2.43338	0	1	1
hsa-miR-4261	0	-2.43338	0	1	1
hsa-miR-4265	0	-2.43338	0	1	1
hsa-miR-4266	0	-2.43338	0	1	1
hsa-miR-4267	0	-2.43338	0	1	1
hsa-miR-4262	0	-2.43338	0	1	1
hsa-miR-2355-5p	0	-2.43338	0	1	1
hsa-miR-4268	0	-2.43338	0	1	1
hsa-miR-4269	0	-2.43338	0	1	1
hsa-miR-4263	0	-2.43338	0	1	1
hsa-miR-4264	0	-2.43338	0	1	1
hsa-miR-4270	0	-2.43338	0	1	1
hsa-miR-4271	0	-2.43338	0	1	1
hsa-miR-4272	0	-2.43338	0	1	1
hsa-miR-4273	0	-2.43338	0	1	1
hsa-miR-4276	0	-2.43338	0	1	1
hsa-miR-4275	0	-2.43338	0	1	1
hsa-miR-4274	0	-2.43338	0	1	1
hsa-miR-4281	0	-2.43338	0	1	1
hsa-miR-4277	0	-2.43338	0	1	1
hsa-miR-4279	0	-2.43338	0	1	1
hsa-miR-4278	0	-2.43338	0	1	1
hsa-miR-4280	0	-2.43338	0	1	1
hsa-miR-4282	0	-2.43338	0	1	1
hsa-miR-4285	0	-2.43338	0	1	1
hsa-miR-4283	0	-2.43338	0	1	1
hsa-miR-4284	0	-2.43338	0	1	1
hsa-miR-4287	0	-2.43338	0	1	1
hsa-miR-4288	0	-2.43338	0	1	1
hsa-miR-4292	0	-2.43338	0	1	1
hsa-miR-4289	0	-2.43338	0	1	1
hsa-miR-4290	0	-2.43338	0	1	1
hsa-miR-4291	0	-2.43338	0	1	1
hsa-miR-4329	0	-2.43338	0	1	1
hsa-miR-4330	0	-2.43338	0	1	1
hsa-miR-500b-3p	0	-2.43338	0	1	1
hsa-miR-4328	0	-2.43338	0	1	1
hsa-miR-3606-5p	0	-2.43338	0	1	1
hsa-miR-3606-3p	0	-2.43338	0	1	1
hsa-miR-3607-5p	0	-2.43338	0	1	1
hsa-miR-3610	0	-2.43338	0	1	1
hsa-miR-3612	0	-2.43338	0	1	1
hsa-miR-3614-3p	0	-2.43338	0	1	1
hsa-miR-3616-5p	0	-2.43338	0	1	1
hsa-miR-3616-3p	0	-2.43338	0	1	1
hsa-miR-3617-3p	0	-2.43338	0	1	1
hsa-miR-3618	0	-2.43338	0	1	1
hsa-miR-3619-5p	0	-2.43338	0	1	1
hsa-miR-23c	0	-2.43338	0	1	1
hsa-miR-3621	0	-2.43338	0	1	1
hsa-miR-3622a-5p	0	-2.43338	0	1	1
hsa-miR-3622a-3p	0	-2.43338	0	1	1
hsa-miR-3622b-5p	0	-2.43338	0	1	1
hsa-miR-3622b-3p	0	-2.43338	0	1	1
hsa-miR-3646	0	-2.43338	0	1	1
hsa-miR-3648	0	-2.43338	0	1	1
hsa-miR-3649	0	-2.43338	0	1	1
hsa-miR-3650	0	-2.43338	0	1	1
hsa-miR-3651	0	-2.43338	0	1	1
hsa-miR-3652	0	-2.43338	0	1	1
hsa-miR-3653-5p	0	-2.43338	0	1	1
hsa-miR-3654	0	-2.43338	0	1	1
hsa-miR-3655	0	-2.43338	0	1	1
hsa-miR-3657	0	-2.43338	0	1	1
hsa-miR-3658	0	-2.43338	0	1	1
hsa-miR-1273e	0	-2.43338	0	1	1
hsa-miR-3659	0	-2.43338	0	1	1
hsa-miR-3660	0	-2.43338	0	1	1
hsa-miR-3662	0	-2.43338	0	1	1
hsa-miR-3663-5p	0	-2.43338	0	1	1
hsa-miR-3663-3p	0	-2.43338	0	1	1
hsa-miR-3664-5p	0	-2.43338	0	1	1
hsa-miR-3664-3p	0	-2.43338	0	1	1
hsa-miR-3665	0	-2.43338	0	1	1
hsa-miR-3666	0	-2.43338	0	1	1
hsa-miR-3668	0	-2.43338	0	1	1
hsa-miR-3670	0	-2.43338	0	1	1
hsa-miR-3671	0	-2.43338	0	1	1
hsa-miR-3672	0	-2.43338	0	1	1
hsa-miR-3674	0	-2.43338	0	1	1
hsa-miR-3675-5p	0	-2.43338	0	1	1
hsa-miR-3675-3p	0	-2.43338	0	1	1
hsa-miR-3677-5p	0	-2.43338	0	1	1
hsa-miR-3678-5p	0	-2.43338	0	1	1
hsa-miR-3678-3p	0	-2.43338	0	1	1
hsa-miR-3679-3p	0	-2.43338	0	1	1
hsa-miR-3680-3p	0	-2.43338	0	1	1
hsa-miR-3681-5p	0	-2.43338	0	1	1
hsa-miR-3681-3p	0	-2.43338	0	1	1
hsa-miR-3682-5p	0	-2.43338	0	1	1
hsa-miR-3683	0	-2.43338	0	1	1
hsa-miR-3684	0	-2.43338	0	1	1
hsa-miR-3685	0	-2.43338	0	1	1
hsa-miR-3686	0	-2.43338	0	1	1
hsa-miR-3689a-5p	0	-2.43338	0	1	1
hsa-miR-3689a-3p	0	-2.43338	0	1	1
hsa-miR-3690	0	-2.43338	0	1	1
hsa-miR-3691-3p	0	-2.43338	0	1	1
hsa-miR-3692-5p	0	-2.43338	0	1	1
hsa-miR-3692-3p	0	-2.43338	0	1	1
hsa-miR-3713	0	-2.43338	0	1	1
hsa-miR-3714	0	-2.43338	0	1	1
hsa-miR-3907	0	-2.43338	0	1	1
hsa-miR-3689b-5p	0	-2.43338	0	1	1
hsa-miR-3689b-3p	0	-2.43338	0	1	1
hsa-miR-3908	0	-2.43338	0	1	1
hsa-miR-3910	0	-2.43338	0	1	1
hsa-miR-3911	0	-2.43338	0	1	1
hsa-miR-3912-5p	0	-2.43338	0	1	1
hsa-miR-3914	0	-2.43338	0	1	1
hsa-miR-3915	0	-2.43338	0	1	1
hsa-miR-3916	0	-2.43338	0	1	1
hsa-miR-3917	0	-2.43338	0	1	1
hsa-miR-3918	0	-2.43338	0	1	1
hsa-miR-3919	0	-2.43338	0	1	1
hsa-miR-3150b-5p	0	-2.43338	0	1	1
hsa-miR-3920	0	-2.43338	0	1	1
hsa-miR-3921	0	-2.43338	0	1	1
hsa-miR-3922-3p	0	-2.43338	0	1	1
hsa-miR-3923	0	-2.43338	0	1	1
hsa-miR-3924	0	-2.43338	0	1	1
hsa-miR-3925-5p	0	-2.43338	0	1	1
hsa-miR-3925-3p	0	-2.43338	0	1	1
hsa-miR-3926	0	-2.43338	0	1	1
hsa-miR-3927-5p	0	-2.43338	0	1	1
hsa-miR-3927-3p	0	-2.43338	0	1	1
hsa-miR-676-5p	0	-2.43338	0	1	1
hsa-miR-676-3p	0	-2.43338	0	1	1
hsa-miR-3928-5p	0	-2.43338	0	1	1
hsa-miR-3929	0	-2.43338	0	1	1
hsa-miR-3934-3p	0	-2.43338	0	1	1
hsa-miR-3935	0	-2.43338	0	1	1
hsa-miR-3936	0	-2.43338	0	1	1
hsa-miR-3937	0	-2.43338	0	1	1
hsa-miR-3938	0	-2.43338	0	1	1
hsa-miR-3939	0	-2.43338	0	1	1
hsa-miR-3940-5p	0	-2.43338	0	1	1
hsa-miR-3941	0	-2.43338	0	1	1
hsa-miR-3942-5p	0	-2.43338	0	1	1
hsa-miR-3942-3p	0	-2.43338	0	1	1
hsa-miR-3943	0	-2.43338	0	1	1
hsa-miR-3944-3p	0	-2.43338	0	1	1
hsa-miR-3945	0	-2.43338	0	1	1
hsa-miR-374c-5p	0	-2.43338	0	1	1
hsa-miR-642b-5p	0	-2.43338	0	1	1
hsa-miR-642b-3p	0	-2.43338	0	1	1
hsa-miR-550b-2-5p	0	-2.43338	0	1	1
hsa-miR-548z	0	-2.43338	0	1	1
hsa-miR-548aa	0	-2.43338	0	1	1
hsa-miR-548o-5p	0	-2.43338	0	1	1
hsa-miR-1268b	0	-2.43338	0	1	1
hsa-miR-4417	0	-2.43338	0	1	1
hsa-miR-4418	0	-2.43338	0	1	1
hsa-miR-4419a	0	-2.43338	0	1	1
hsa-miR-4420	0	-2.43338	0	1	1
hsa-miR-4421	0	-2.43338	0	1	1
hsa-miR-4422	0	-2.43338	0	1	1
hsa-miR-4423-5p	0	-2.43338	0	1	1
hsa-miR-4423-3p	0	-2.43338	0	1	1
hsa-miR-4424	0	-2.43338	0	1	1
hsa-miR-4425	0	-2.43338	0	1	1
hsa-miR-4426	0	-2.43338	0	1	1
hsa-miR-4427	0	-2.43338	0	1	1
hsa-miR-4428	0	-2.43338	0	1	1
hsa-miR-4430	0	-2.43338	0	1	1
hsa-miR-4431	0	-2.43338	0	1	1
hsa-miR-4432	0	-2.43338	0	1	1
hsa-miR-4434	0	-2.43338	0	1	1
hsa-miR-4436a	0	-2.43338	0	1	1
hsa-miR-4437	0	-2.43338	0	1	1
hsa-miR-548ae-5p	0	-2.43338	0	1	1
hsa-miR-4438	0	-2.43338	0	1	1
hsa-miR-4439	0	-2.43338	0	1	1
hsa-miR-4441	0	-2.43338	0	1	1
hsa-miR-4442	0	-2.43338	0	1	1
hsa-miR-4444	0	-2.43338	0	1	1
hsa-miR-4445-5p	0	-2.43338	0	1	1
hsa-miR-4445-3p	0	-2.43338	0	1	1
hsa-miR-4446-5p	0	-2.43338	0	1	1
hsa-miR-4447	0	-2.43338	0	1	1
hsa-miR-4449	0	-2.43338	0	1	1
hsa-miR-548ag	0	-2.43338	0	1	1
hsa-miR-4450	0	-2.43338	0	1	1
hsa-miR-548ah-5p	0	-2.43338	0	1	1
hsa-miR-4451	0	-2.43338	0	1	1
hsa-miR-4452	0	-2.43338	0	1	1
hsa-miR-4453	0	-2.43338	0	1	1
hsa-miR-4454	0	-2.43338	0	1	1
hsa-miR-4455	0	-2.43338	0	1	1
hsa-miR-4456	0	-2.43338	0	1	1
hsa-miR-4457	0	-2.43338	0	1	1
hsa-miR-4458	0	-2.43338	0	1	1
hsa-miR-4459	0	-2.43338	0	1	1
hsa-miR-4460	0	-2.43338	0	1	1
hsa-miR-4461	0	-2.43338	0	1	1
hsa-miR-4462	0	-2.43338	0	1	1
hsa-miR-4463	0	-2.43338	0	1	1
hsa-miR-4464	0	-2.43338	0	1	1
hsa-miR-548ai	0	-2.43338	0	1	1
hsa-miR-548aj-3p	0	-2.43338	0	1	1
hsa-miR-4465	0	-2.43338	0	1	1
hsa-miR-4468	0	-2.43338	0	1	1
hsa-miR-4469	0	-2.43338	0	1	1
hsa-miR-4471	0	-2.43338	0	1	1
hsa-miR-4474-5p	0	-2.43338	0	1	1
hsa-miR-4475	0	-2.43338	0	1	1
hsa-miR-4476	0	-2.43338	0	1	1
hsa-miR-4477a	0	-2.43338	0	1	1
hsa-miR-4477b	0	-2.43338	0	1	1
hsa-miR-4478	0	-2.43338	0	1	1
hsa-miR-3689c	0	-2.43338	0	1	1
hsa-miR-3689d	0	-2.43338	0	1	1
hsa-miR-3689e	0	-2.43338	0	1	1
hsa-miR-3689f	0	-2.43338	0	1	1
hsa-miR-4480	0	-2.43338	0	1	1
hsa-miR-4481	0	-2.43338	0	1	1
hsa-miR-4482-5p	0	-2.43338	0	1	1
hsa-miR-4482-3p	0	-2.43338	0	1	1
hsa-miR-4483	0	-2.43338	0	1	1
hsa-miR-4484	0	-2.43338	0	1	1
hsa-miR-4485-5p	0	-2.43338	0	1	1
hsa-miR-4485-3p	0	-2.43338	0	1	1
hsa-miR-4486	0	-2.43338	0	1	1
hsa-miR-4487	0	-2.43338	0	1	1
hsa-miR-4490	0	-2.43338	0	1	1
hsa-miR-4491	0	-2.43338	0	1	1
hsa-miR-4493	0	-2.43338	0	1	1
hsa-miR-4494	0	-2.43338	0	1	1
hsa-miR-4495	0	-2.43338	0	1	1
hsa-miR-4496	0	-2.43338	0	1	1
hsa-miR-4419b	0	-2.43338	0	1	1
hsa-miR-4499	0	-2.43338	0	1	1
hsa-miR-4501	0	-2.43338	0	1	1
hsa-miR-4502	0	-2.43338	0	1	1
hsa-miR-4503	0	-2.43338	0	1	1
hsa-miR-4505	0	-2.43338	0	1	1
hsa-miR-4506	0	-2.43338	0	1	1
hsa-miR-2392	0	-2.43338	0	1	1
hsa-miR-4509	0	-2.43338	0	1	1
hsa-miR-4512	0	-2.43338	0	1	1
hsa-miR-4513	0	-2.43338	0	1	1
hsa-miR-4514	0	-2.43338	0	1	1
hsa-miR-4515	0	-2.43338	0	1	1
hsa-miR-4517	0	-2.43338	0	1	1
hsa-miR-4518	0	-2.43338	0	1	1
hsa-miR-4519	0	-2.43338	0	1	1
hsa-miR-4520-5p	0	-2.43338	0	1	1
hsa-miR-4520-3p	0	-2.43338	0	1	1
hsa-miR-1269b	0	-2.43338	0	1	1
hsa-miR-4522	0	-2.43338	0	1	1
hsa-miR-4523	0	-2.43338	0	1	1
hsa-miR-4524a-5p	0	-2.43338	0	1	1
hsa-miR-4524a-3p	0	-2.43338	0	1	1
hsa-miR-4527	0	-2.43338	0	1	1
hsa-miR-4528	0	-2.43338	0	1	1
hsa-miR-4529-5p	0	-2.43338	0	1	1
hsa-miR-4529-3p	0	-2.43338	0	1	1
hsa-miR-4530	0	-2.43338	0	1	1
hsa-miR-4531	0	-2.43338	0	1	1
hsa-miR-4534	0	-2.43338	0	1	1
hsa-miR-4535	0	-2.43338	0	1	1
hsa-miR-548am-3p	0	-2.43338	0	1	1
hsa-miR-4536-5p	0	-2.43338	0	1	1
hsa-miR-4536-3p	0	-2.43338	0	1	1
hsa-miR-548an	0	-2.43338	0	1	1
hsa-miR-4537	0	-2.43338	0	1	1
hsa-miR-4538	0	-2.43338	0	1	1
hsa-miR-4539	0	-2.43338	0	1	1
hsa-miR-4540	0	-2.43338	0	1	1
hsa-miR-3972	0	-2.43338	0	1	1
hsa-miR-3973	0	-2.43338	0	1	1
hsa-miR-3974	0	-2.43338	0	1	1
hsa-miR-3975	0	-2.43338	0	1	1
hsa-miR-3976	0	-2.43338	0	1	1
hsa-miR-3977	0	-2.43338	0	1	1
hsa-miR-3978	0	-2.43338	0	1	1
hsa-miR-4632-5p	0	-2.43338	0	1	1
hsa-miR-4632-3p	0	-2.43338	0	1	1
hsa-miR-4633-5p	0	-2.43338	0	1	1
hsa-miR-4633-3p	0	-2.43338	0	1	1
hsa-miR-4634	0	-2.43338	0	1	1
hsa-miR-4635	0	-2.43338	0	1	1
hsa-miR-4636	0	-2.43338	0	1	1
hsa-miR-4639-3p	0	-2.43338	0	1	1
hsa-miR-4640-5p	0	-2.43338	0	1	1
hsa-miR-4640-3p	0	-2.43338	0	1	1
hsa-miR-4641	0	-2.43338	0	1	1
hsa-miR-4643	0	-2.43338	0	1	1
hsa-miR-4645-5p	0	-2.43338	0	1	1
hsa-miR-4648	0	-2.43338	0	1	1
hsa-miR-4649-5p	0	-2.43338	0	1	1
hsa-miR-4649-3p	0	-2.43338	0	1	1
hsa-miR-4650-5p	0	-2.43338	0	1	1
hsa-miR-4650-3p	0	-2.43338	0	1	1
hsa-miR-4651	0	-2.43338	0	1	1
hsa-miR-4652-5p	0	-2.43338	0	1	1
hsa-miR-4652-3p	0	-2.43338	0	1	1
hsa-miR-4653-5p	0	-2.43338	0	1	1
hsa-miR-4653-3p	0	-2.43338	0	1	1
hsa-miR-4654	0	-2.43338	0	1	1
hsa-miR-4655-5p	0	-2.43338	0	1	1
hsa-miR-4655-3p	0	-2.43338	0	1	1
hsa-miR-4656	0	-2.43338	0	1	1
hsa-miR-4658	0	-2.43338	0	1	1
hsa-miR-4661-5p	0	-2.43338	0	1	1
hsa-miR-4661-3p	0	-2.43338	0	1	1
hsa-miR-4662a-5p	0	-2.43338	0	1	1
hsa-miR-4662a-3p	0	-2.43338	0	1	1
hsa-miR-4659b-3p	0	-2.43338	0	1	1
hsa-miR-4663	0	-2.43338	0	1	1
hsa-miR-4662b	0	-2.43338	0	1	1
hsa-miR-4664-5p	0	-2.43338	0	1	1
hsa-miR-4665-3p	0	-2.43338	0	1	1
hsa-miR-4666a-5p	0	-2.43338	0	1	1
hsa-miR-4666a-3p	0	-2.43338	0	1	1
hsa-miR-4667-3p	0	-2.43338	0	1	1
hsa-miR-4668-5p	0	-2.43338	0	1	1
hsa-miR-4668-3p	0	-2.43338	0	1	1
hsa-miR-219b-3p	0	-2.43338	0	1	1
hsa-miR-4670-5p	0	-2.43338	0	1	1
hsa-miR-4670-3p	0	-2.43338	0	1	1
hsa-miR-4671-5p	0	-2.43338	0	1	1
hsa-miR-4671-3p	0	-2.43338	0	1	1
hsa-miR-4673	0	-2.43338	0	1	1
hsa-miR-4674	0	-2.43338	0	1	1
hsa-miR-4675	0	-2.43338	0	1	1
hsa-miR-4677-5p	0	-2.43338	0	1	1
hsa-miR-4679	0	-2.43338	0	1	1
hsa-miR-4680-5p	0	-2.43338	0	1	1
hsa-miR-4680-3p	0	-2.43338	0	1	1
hsa-miR-4681	0	-2.43338	0	1	1
hsa-miR-4682	0	-2.43338	0	1	1
hsa-miR-4683	0	-2.43338	0	1	1
hsa-miR-4684-5p	0	-2.43338	0	1	1
hsa-miR-4684-3p	0	-2.43338	0	1	1
hsa-miR-4685-5p	0	-2.43338	0	1	1
hsa-miR-4686	0	-2.43338	0	1	1
hsa-miR-4687-5p	0	-2.43338	0	1	1
hsa-miR-4687-3p	0	-2.43338	0	1	1
hsa-miR-1343-5p	0	-2.43338	0	1	1
hsa-miR-4688	0	-2.43338	0	1	1
hsa-miR-4689	0	-2.43338	0	1	1
hsa-miR-4690-5p	0	-2.43338	0	1	1
hsa-miR-4691-5p	0	-2.43338	0	1	1
hsa-miR-4691-3p	0	-2.43338	0	1	1
hsa-miR-4692	0	-2.43338	0	1	1
hsa-miR-4693-5p	0	-2.43338	0	1	1
hsa-miR-4693-3p	0	-2.43338	0	1	1
hsa-miR-4694-5p	0	-2.43338	0	1	1
hsa-miR-4694-3p	0	-2.43338	0	1	1
hsa-miR-4695-5p	0	-2.43338	0	1	1
hsa-miR-4695-3p	0	-2.43338	0	1	1
hsa-miR-4696	0	-2.43338	0	1	1
hsa-miR-4697-5p	0	-2.43338	0	1	1
hsa-miR-4697-3p	0	-2.43338	0	1	1
hsa-miR-4698	0	-2.43338	0	1	1
hsa-miR-4699-5p	0	-2.43338	0	1	1
hsa-miR-4699-3p	0	-2.43338	0	1	1
hsa-miR-4700-5p	0	-2.43338	0	1	1
hsa-miR-4700-3p	0	-2.43338	0	1	1
hsa-miR-4701-5p	0	-2.43338	0	1	1
hsa-miR-4701-3p	0	-2.43338	0	1	1
hsa-miR-4703-5p	0	-2.43338	0	1	1
hsa-miR-4703-3p	0	-2.43338	0	1	1
hsa-miR-4704-5p	0	-2.43338	0	1	1
hsa-miR-4704-3p	0	-2.43338	0	1	1
hsa-miR-4705	0	-2.43338	0	1	1
hsa-miR-4706	0	-2.43338	0	1	1
hsa-miR-4707-5p	0	-2.43338	0	1	1
hsa-miR-4708-5p	0	-2.43338	0	1	1
hsa-miR-4708-3p	0	-2.43338	0	1	1
hsa-miR-4709-5p	0	-2.43338	0	1	1
hsa-miR-4709-3p	0	-2.43338	0	1	1
hsa-miR-203b-5p	0	-2.43338	0	1	1
hsa-miR-203b-3p	0	-2.43338	0	1	1
hsa-miR-4710	0	-2.43338	0	1	1
hsa-miR-4711-5p	0	-2.43338	0	1	1
hsa-miR-4711-3p	0	-2.43338	0	1	1
hsa-miR-4712-5p	0	-2.43338	0	1	1
hsa-miR-4712-3p	0	-2.43338	0	1	1
hsa-miR-4713-5p	0	-2.43338	0	1	1
hsa-miR-4713-3p	0	-2.43338	0	1	1
hsa-miR-4714-3p	0	-2.43338	0	1	1
hsa-miR-4715-5p	0	-2.43338	0	1	1
hsa-miR-4715-3p	0	-2.43338	0	1	1
hsa-miR-4716-5p	0	-2.43338	0	1	1
hsa-miR-4716-3p	0	-2.43338	0	1	1
hsa-miR-3529-5p	0	-2.43338	0	1	1
hsa-miR-4717-5p	0	-2.43338	0	1	1
hsa-miR-4717-3p	0	-2.43338	0	1	1
hsa-miR-4718	0	-2.43338	0	1	1
hsa-miR-4719	0	-2.43338	0	1	1
hsa-miR-4720-5p	0	-2.43338	0	1	1
hsa-miR-4720-3p	0	-2.43338	0	1	1
hsa-miR-4721	0	-2.43338	0	1	1
hsa-miR-4722-5p	0	-2.43338	0	1	1
hsa-miR-4722-3p	0	-2.43338	0	1	1
hsa-miR-4520-2-3p	0	-2.43338	0	1	1
hsa-miR-4723-5p	0	-2.43338	0	1	1
hsa-miR-4723-3p	0	-2.43338	0	1	1
hsa-miR-4724-5p	0	-2.43338	0	1	1
hsa-miR-4724-3p	0	-2.43338	0	1	1
hsa-miR-4725-5p	0	-2.43338	0	1	1
hsa-miR-4725-3p	0	-2.43338	0	1	1
hsa-miR-4726-3p	0	-2.43338	0	1	1
hsa-miR-4727-5p	0	-2.43338	0	1	1
hsa-miR-4727-3p	0	-2.43338	0	1	1
hsa-miR-4728-5p	0	-2.43338	0	1	1
hsa-miR-4728-3p	0	-2.43338	0	1	1
hsa-miR-4729	0	-2.43338	0	1	1
hsa-miR-4730	0	-2.43338	0	1	1
hsa-miR-4731-5p	0	-2.43338	0	1	1
hsa-miR-4731-3p	0	-2.43338	0	1	1
hsa-miR-4733-5p	0	-2.43338	0	1	1
hsa-miR-4733-3p	0	-2.43338	0	1	1
hsa-miR-4735-5p	0	-2.43338	0	1	1
hsa-miR-4735-3p	0	-2.43338	0	1	1
hsa-miR-4736	0	-2.43338	0	1	1
hsa-miR-4737	0	-2.43338	0	1	1
hsa-miR-4738-5p	0	-2.43338	0	1	1
hsa-miR-4739	0	-2.43338	0	1	1
hsa-miR-4740-5p	0	-2.43338	0	1	1
hsa-miR-4740-3p	0	-2.43338	0	1	1
hsa-miR-4741	0	-2.43338	0	1	1
hsa-miR-4743-5p	0	-2.43338	0	1	1
hsa-miR-4743-3p	0	-2.43338	0	1	1
hsa-miR-4744	0	-2.43338	0	1	1
hsa-miR-3591-5p	0	-2.43338	0	1	1
hsa-miR-3591-3p	0	-2.43338	0	1	1
hsa-miR-4745-5p	0	-2.43338	0	1	1
hsa-miR-4745-3p	0	-2.43338	0	1	1
hsa-miR-4746-3p	0	-2.43338	0	1	1
hsa-miR-4748	0	-2.43338	0	1	1
hsa-miR-4749-5p	0	-2.43338	0	1	1
hsa-miR-4749-3p	0	-2.43338	0	1	1
hsa-miR-4750-3p	0	-2.43338	0	1	1
hsa-miR-4751	0	-2.43338	0	1	1
hsa-miR-4752	0	-2.43338	0	1	1
hsa-miR-4753-3p	0	-2.43338	0	1	1
hsa-miR-371b-5p	0	-2.43338	0	1	1
hsa-miR-371b-3p	0	-2.43338	0	1	1
hsa-miR-4754	0	-2.43338	0	1	1
hsa-miR-4755-5p	0	-2.43338	0	1	1
hsa-miR-499b-5p	0	-2.43338	0	1	1
hsa-miR-499b-3p	0	-2.43338	0	1	1
hsa-miR-4756-5p	0	-2.43338	0	1	1
hsa-miR-4756-3p	0	-2.43338	0	1	1
hsa-miR-4757-5p	0	-2.43338	0	1	1
hsa-miR-4757-3p	0	-2.43338	0	1	1
hsa-miR-4758-5p	0	-2.43338	0	1	1
hsa-miR-4758-3p	0	-2.43338	0	1	1
hsa-miR-4759	0	-2.43338	0	1	1
hsa-miR-4760-5p	0	-2.43338	0	1	1
hsa-miR-4760-3p	0	-2.43338	0	1	1
hsa-miR-4761-5p	0	-2.43338	0	1	1
hsa-miR-4761-3p	0	-2.43338	0	1	1
hsa-miR-4763-5p	0	-2.43338	0	1	1
hsa-miR-4763-3p	0	-2.43338	0	1	1
hsa-miR-4764-5p	0	-2.43338	0	1	1
hsa-miR-4764-3p	0	-2.43338	0	1	1
hsa-miR-4765	0	-2.43338	0	1	1
hsa-miR-4766-5p	0	-2.43338	0	1	1
hsa-miR-4766-3p	0	-2.43338	0	1	1
hsa-miR-4768-5p	0	-2.43338	0	1	1
hsa-miR-4768-3p	0	-2.43338	0	1	1
hsa-miR-4769-5p	0	-2.43338	0	1	1
hsa-miR-4769-3p	0	-2.43338	0	1	1
hsa-miR-4770	0	-2.43338	0	1	1
hsa-miR-4771	0	-2.43338	0	1	1
hsa-miR-4773	0	-2.43338	0	1	1
hsa-miR-4774-5p	0	-2.43338	0	1	1
hsa-miR-4774-3p	0	-2.43338	0	1	1
hsa-miR-4775	0	-2.43338	0	1	1
hsa-miR-4776-5p	0	-2.43338	0	1	1
hsa-miR-4776-3p	0	-2.43338	0	1	1
hsa-miR-4777-5p	0	-2.43338	0	1	1
hsa-miR-4777-3p	0	-2.43338	0	1	1
hsa-miR-4778-5p	0	-2.43338	0	1	1
hsa-miR-4778-3p	0	-2.43338	0	1	1
hsa-miR-4779	0	-2.43338	0	1	1
hsa-miR-4780	0	-2.43338	0	1	1
hsa-miR-4436b-5p	0	-2.43338	0	1	1
hsa-miR-4436b-3p	0	-2.43338	0	1	1
hsa-miR-4781-5p	0	-2.43338	0	1	1
hsa-miR-4782-5p	0	-2.43338	0	1	1
hsa-miR-4782-3p	0	-2.43338	0	1	1
hsa-miR-4783-5p	0	-2.43338	0	1	1
hsa-miR-4783-3p	0	-2.43338	0	1	1
hsa-miR-4784	0	-2.43338	0	1	1
hsa-miR-1245b-5p	0	-2.43338	0	1	1
hsa-miR-1245b-3p	0	-2.43338	0	1	1
hsa-miR-2467-5p	0	-2.43338	0	1	1
hsa-miR-2467-3p	0	-2.43338	0	1	1
[truncated: 590 more rows]
